# Supplementary material for: Expression of Calcification and Extracellular Matrix Genes in the Cardiovascular System of the Healthy Domestic Sheep (Ovis aries)
Source: Front Genet. 2020 Sep 8;11:919. doi: 10.3389/fgene.2020.00919 (PMC7506100; doi:10.3389/fgene.2020.00919)
Supplement: DATASET S1 — Gene expression estimates as transcripts per million (TPM) for seven cardiovascular tissues and skeletal muscle (bicep) generated for the sheep gene expression atlas using Kallisto. [file Table_1.XLS]

## Sheet: Supplemental Dataset 1.txt
Supplemental Dataset 1: Gene expression estimates as transcripts per million (TPM) for seven cardiovascular tissues and skeletal muscle bicep generated for the sheep gene expression atlas using Kallisto.
Gene name	Synonyms	Ensembl gene ID	Entrez gene ID	Location (chr:start-end:strand)	Gene type	Description	GO term (molecular function)	GO term (biological process)	GO term (cellular component)	aortic valve (TxBF adult)	left atrioventricular valve (TxBF adult)	right atrioventricular valve (TxBF adult)	left auricle (TxBF adult)	right auricle (TxBF adult)	left ventricle (TxBF adult)	right ventricle (TxBF adult)	skeletal muscle bicep (TxBF adult)
Breed										TxBF	TxBF	TxBF	TxBF	TxBF	TxBF	TxBF	TxBF
Age										adult	adult	adult	adult	adult	adult	adult	adult
Organ system										cardiovascular system	cardiovascular system	cardiovascular system	cardiovascular system	cardiovascular system	cardiovascular system	cardiovascular system	muscular system
COX1	Atax.mt.05 | BmR1_mt00005 | BniMp038 | CO I | CO1 | COI | COX-I | CoxI | DidioMp25 | GbM_p06 | Gchil_036 | GhM_p34 | KC05Mt_p0002 | LOBIN_mt001 | MOGBL43 | MT-CO1 | MTCO1 | MtOm_00004 | OXI3 | Ordi2M_p01 | OrmaM_p01 | OxteM_p01 | PlpuMp57 | SfiM_p01 | Smar.m61 | SunM_p01 | TefuM_p01 | TuorMp24 | VN03_05 | co1 | cox-1 | cox1 | cox1-i3 | cox1-i4 | cox1-i5 | cox1-i7 | cox1-i9 | coxI | mt-co1 | mtco1	ENSOARG00000000016	808251	MT:5332-6876:+1	protein-coding	Cytochrome c oxidase subunit 1	iron ion binding (GO:0005506) | protein binding (GO:0005515) | heme binding (GO:0020037) | metal ion binding (GO:0046872) | electron carrier activity (GO:0009055) | oxidoreductase activity (GO:0016491) | cytochrome-c oxidase activity (GO:0004129)	hydrogen ion transmembrane transport (GO:1902600) | aerobic respiration (GO:0009060) | oxidative phosphorylation (GO:0006119) | oxidation-reduction process (GO:0055114)	integral component of membrane (GO:0016021) | respiratory chain (GO:0070469) | membrane (GO:0016020) | respiratory chain complex IV (GO:0045277) | mitochondrion (GO:0005739) | mitochondrial inner membrane (GO:0005743) | mitochondrial respiratory chain complex IV (GO:0005751)	8365.73	8286.15	15561.2	72970.9	71057.8	86642.6	75246.9	45800
ATP6	ATPase 6 | ATPase6 | Atax.mt.34 | BniMp060 | DidioMp23 | GbM_p27 | Gchil_007 | GhM_p22 | GhM_p24 | KC05Mt_p0006 | LOBIN_mt049 | MOGBL40 | MT-ATP6 | MTATP6 | MtOm_00023 | OLI2 | OLI4 | Ordi2M_p21 | OrmaM_p21 | OxteM_p21 | PHO1 | PlpuMp07 | SfiM_p21 | Smar.m03 | SunM_p21 | TefuM_p22 | TuorMp22 | VN03_10 | mtatp6	ENSOARG00000000022	808254	MT:7936-8614:+1	protein-coding	ATP synthase subunit a	ATPase activity (GO:0016887) | hydrogen ion transmembrane transporter activity (GO:0015078)	ATP synthesis coupled proton transport (GO:0015986) | ATP biosynthetic process (GO:0006754) | transport (GO:0006810) | ion transport (GO:0006811) | proton transport (GO:0015992)	integral component of membrane (GO:0016021) | mitochondrial proton-transporting ATP synthase complex (GO:0005753) | membrane (GO:0016020) | mitochondrion (GO:0005739) | proton-transporting ATP synthase complex, coupling factor F(o) (GO:0045263) | extracellular exosome (GO:0070062) | mitochondrial inner membrane (GO:0005743)	8732.09	8298.63	12564.6	43365.2	42326.7	58211.8	50226.3	30855
COIII	BB253_3603 | BPP5_4373 | cox3	ENSOARG00000000023	808261	MT:8616-9399:+1	protein-coding	Cytochrome c oxidase subunit 3	protein binding (GO:0005515) | heme-copper terminal oxidase activity (GO:0015002) | cytochrome-c oxidase activity (GO:0004129)	hydrogen ion transmembrane transport (GO:1902600) | aerobic electron transport chain (GO:0019646) | respiratory electron transport chain (GO:0022904) | respiratory chain complex IV assembly (GO:0008535)	integral component of membrane (GO:0016021) | membrane (GO:0016020) | respiratory chain complex IV (GO:0045277) | mitochondrion (GO:0005739) | mitochondrial inner membrane (GO:0005743)	7413.04	7081.07	11618.4	40624.4	39515.8	53343.3	49110.6	30555.7
ENSOARG00000007815	.	ENSOARG00000007815	.	6:89459978-89460052:-1	protein-coding	Uncharacterized protein	structural constituent of ribosome (GO:0003735)	translation (GO:0006412)	ribosome (GO:0005840)	49640.4	49248.7	40036.6	17240	18114.2	12985	14837.9	13123.5
COX2	Atax.mt.06 | CO II | CO2 | COII | COX-II | CoxII | DidioMp30 | GbM_p22 | Gchil_035 | GhM_p15 | GhM_p16 | KC05Mt_p0013 | LOBIN_mt045 | MOGBL48 | MT-CO2 | MTCO2 | MtOm_00015 | OXI1 | OXII | Ordi2M_p23 | OrmaM_p23 | OxteM_p23 | PlpuMp43 | SfiM_p23 | Smar.m60 | SunM_p23 | TefuM_p24 | TuorMp27 | VN03_06 | cCOII | co2 | cox2 | coxII | mtco2	ENSOARG00000000019	808252	MT:7019-7702:+1	protein-coding	Cytochrome c oxidase subunit 2	protein binding (GO:0005515) | metal ion binding (GO:0046872) | copper ion binding (GO:0005507) | oxidoreductase activity (GO:0016491) | cytochrome-c oxidase activity (GO:0004129)	hydrogen ion transmembrane transport (GO:1902600) | electron transport chain (GO:0022900) | oxidation-reduction process (GO:0055114)	integral component of membrane (GO:0016021) | respiratory chain (GO:0070469) | membrane (GO:0016020) | respiratory chain complex IV (GO:0045277) | mitochondrion (GO:0005739) | extracellular exosome (GO:0070062) | mitochondrial inner membrane (GO:0005743)	6591.85	6520.73	9552.54	32690.8	32255.5	38422.6	36096.2	23824.9
MGP	F21M11.25 | F21M11_25 | GIG36 | MGLAP | MPG | Magpie | Mglap | NTI | mgp-A | xmgp	ENSOARG00000020724	101106925	3:199861166-199864509:+1	protein-coding	matrix Gla protein	protein binding (GO:0005515) | calcium ion binding (GO:0005509)	regulation of bone mineralization (GO:0030500)	extracellular matrix (GO:0031012) | extracellular exosome (GO:0070062) | extracellular region (GO:0005576)	33483.6	10938.2	10917	6087.28	7678.39	1933.13	2292.86	949.708
ATP8	AAP1 | ATPase 8 | ATPase8 | Atax.mt.33 | Atp8 | BniMp028 | DidioMp26 | GbM_p30 | Gchil_008 | GhM_p1 | KC05Mt_p0005 | LOBIN_mt006 | MOGBL55 | MT-ATP8 | MTATP8 | MtOm_00007 | Ordi2M_p03 | OrmaM_p03 | OxteM_p03 | PlpuMp37 | SfiM_p03 | Smar.m22 | SunM_p03 | TefuM_p03 | TuorMp34 | VN03_09 | mtatp8 | orf137 | orf172 | orfB | orfB (angiosperms)	ENSOARG00000000021	808253	MT:7775-7975:+1	protein-coding	ATP synthase protein 8	ATPase activity (GO:0016887) | hydrogen ion transmembrane transporter activity (GO:0015078)	ATP synthesis coupled proton transport (GO:0015986) | ATP biosynthetic process (GO:0006754) | transport (GO:0006810) | ion transport (GO:0006811) | proton transport (GO:0015992)	integral component of membrane (GO:0016021) | mitochondrial proton-transporting ATP synthase complex (GO:0005753) | mitochondrial membrane (GO:0031966) | membrane (GO:0016020) | mitochondrion (GO:0005739) | proton-transporting ATP synthase complex, coupling factor F(o) (GO:0045263) | mitochondrial proton-transporting ATP synthase complex, coupling factor F(o) (GO:0000276)	6565.85	5821.17	7976.07	30213.6	33447.7	29097.5	32263.1	15407.1
ND4	MTND4 | MTND4L | MtOm_00036 | NAD4 | NADH 4 | NADH-4 | NADH4 | VN03_29 | mtnd4 | nad4 | nd4 | ndh-U4	ENSOARG00000000028	808257	MT:10175-11552:+1	protein-coding	NADH-ubiquinone oxidoreductase chain 4	oxidoreductase activity (GO:0016491) | NADH dehydrogenase (ubiquinone) activity (GO:0008137)	ATP synthesis coupled electron transport (GO:0042773) | mitochondrial electron transport, NADH to ubiquinone (GO:0006120) | oxidation-reduction process (GO:0055114)	integral component of membrane (GO:0016021) | respiratory chain (GO:0070469) | mitochondrial membrane (GO:0031966) | mitochondrial respiratory chain complex I (GO:0005747) | membrane (GO:0016020) | mitochondrion (GO:0005739)	6199.44	5568.81	8320.66	26604.6	25880.7	30940.4	28305	13462
CYTB	COB | Cob | Cyt b | CytB | Cytb | Cytochrome b | MTCYB | MtOm_00035 | VN03_34 | cob | cyt-b | cytB | cytb | mtcyb	ENSOARG00000000035	808260	MT:14159-15298:+1	protein-coding	cytochrome b (mitochondrion)	ubiquinol-cytochrome-c reductase activity (GO:0008121) | metal ion binding (GO:0046872) | electron carrier activity (GO:0009055) | oxidoreductase activity (GO:0016491)	mitochondrial electron transport, ubiquinol to cytochrome c (GO:0006122) | hydrogen ion transmembrane transport (GO:1902600) | respiratory electron transport chain (GO:0022904) | oxidation-reduction process (GO:0055114)	integral component of membrane (GO:0016021) | respiratory chain (GO:0070469) | membrane (GO:0016020) | respiratory chain complex III (GO:0045275) | mitochondrion (GO:0005739)	4874.61	4589.19	6955.28	24241.7	24728.2	29856.9	29526.8	13362.2
ND1	MTND1 | MtOm_00030 | NADH 1 | NADH-1 | NADH1 | VN03_19 | mtnd1 | nad1 | nd1	ENSOARG00000000006	808249	MT:2745-3699:+1	protein-coding	NADH-ubiquinone oxidoreductase chain 1	protein binding (GO:0005515) | oxidoreductase activity (GO:0016491) | NADH dehydrogenase (ubiquinone) activity (GO:0008137)	oxidation-reduction process (GO:0055114)	integral component of membrane (GO:0016021) | mitochondrial membrane (GO:0031966) | respiratory chain (GO:0070469) | mitochondrial respiratory chain complex I (GO:0005747) | membrane (GO:0016020) | mitochondrion (GO:0005739) | mitochondrial inner membrane (GO:0005743)	3870.6	3808.47	5183.66	21384.9	18128.5	23493.8	22457.4	10087.3
ND4L	MTND4L | MtOm_00021 | NADH 4L | NADH-4L | NADH4L | VN03_30 | mtnd4l | nad4L | nd4L | ndh-U4L	ENSOARG00000000027	808256	MT:9885-10181:+1	protein-coding	NADH-ubiquinone oxidoreductase chain 4L	oxidoreductase activity, acting on NAD(P)H (GO:0016651) | oxidoreductase activity (GO:0016491) | NADH dehydrogenase (ubiquinone) activity (GO:0008137)	ATP synthesis coupled electron transport (GO:0042773) | oxidation-reduction process (GO:0055114)	integral component of membrane (GO:0016021) | respiratory chain (GO:0070469) | mitochondrial membrane (GO:0031966) | membrane (GO:0016020) | mitochondrion (GO:0005739)	4325.35	3894.64	5692.47	21105.1	19790.6	14497	21465.5	6009.8
ND2	MTND2 | MtOm_00025 | NADH 2 | NADH-2 | NADH2 | VN03_02 | mtnd2 | nad2 | nd2 | ndh-U1	ENSOARG00000000010	808250	MT:3910-4951:+1	protein-coding	NADH-ubiquinone oxidoreductase chain 2	oxidoreductase activity (GO:0016491) | NADH dehydrogenase (ubiquinone) activity (GO:0008137)	reactive oxygen species metabolic process (GO:0072593) | mitochondrial electron transport, NADH to ubiquinone (GO:0006120) | oxidation-reduction process (GO:0055114)	integral component of membrane (GO:0016021) | respiratory chain (GO:0070469) | mitochondrial respiratory chain complex I (GO:0005747) | membrane (GO:0016020) | mitochondrion (GO:0005739) | mitochondrial inner membrane (GO:0005743)	5007.12	4603.11	6084.77	20790.4	20004.6	15006.6	18749.2	4862.36
ENSOARG00000016955	.	ENSOARG00000016955	.	15:16723826-16723918:-1	protein-coding	sarcolipin	enzyme regulator activity (GO:0030234)	regulation of catalytic activity (GO:0050790)	membrane (GO:0016020)	2.876	5.743	812.486	11660.2	12675.1	49.2	135.868	19793.1
TMSB4Y	TB4Y	ENSOARG00000003793	.	23:16654968-16655174:+1	protein-coding	thymosin beta 4, Y-linked	actin binding (GO:0003779) | protein binding (GO:0005515) | actin monomer binding (GO:0003785)	regulation of cell migration (GO:0030334) | actin cytoskeleton organization (GO:0030036) | sequestering of actin monomers (GO:0042989) | actin filament organization (GO:0007015)	nucleus (GO:0005634) | cytosol (GO:0005829) | cytoplasm (GO:0005737)	15392.5	19178.8	13854.2	3823.24	4876.13	2148.08	3071.5	1675.34
ENSOARG00000007617	.	ENSOARG00000007617	.	10:15835603-15837847:-1	protein-coding	Uncharacterized protein	unknown	unknown	unknown	10653.8	10158.8	10083.3	4707.35	4161.9	5524.53	4609.7	18918.6
ND3	MTND3 | MtOm_00019 | NADH 3 | NADH-3 | NADH3 | VN03_13 | mtnd3 | nad3 | nd3 | ndh-U3	ENSOARG00000000025	808255	MT:9469-9814:+1	protein-coding	NADH-ubiquinone oxidoreductase chain 3	protein binding (GO:0005515) | oxidoreductase activity (GO:0016491) | NADH dehydrogenase (ubiquinone) activity (GO:0008137)	oxidation-reduction process (GO:0055114)	integral component of membrane (GO:0016021) | respiratory chain (GO:0070469) | mitochondrial membrane (GO:0031966) | mitochondrial respiratory chain complex I (GO:0005747) | membrane (GO:0016020) | mitochondrion (GO:0005739)	4544.97	3952.94	4556.28	18644.2	16955	13984.7	17813.7	6143.77
MYL4	ALC1 | AMLC | ELC | ELC1a | GT1 | L23 | MLC | MLC1E/A | MLC1a | MLC1av | Myla | PRO1957 | im:7136900 | mlc1av-A | zgc:114164	ENSOARG00000011750	101121691	11:45705716-45718546:+1	protein-coding	myosin light chain 4	calcium ion binding (GO:0005509) | actin monomer binding (GO:0003785) | actin filament binding (GO:0051015)	cardiac muscle contraction (GO:0060048) | regulation of the force of heart contraction (GO:0002026) | positive regulation of ATPase activity (GO:0032781)	A band (GO:0031672)	0.857	5.431	610.218	17872.7	13995.3	904.836	79.978	300.958
MYL7	MLC-2alpha | MLC2a | MLRA | MYL2A | MYLC2A | Mylc2a | RLC-A | cmlc2 | mcmlc2 | mlc2 | myl2a | mylc2a | zgc:92755	ENSOARG00000016077	.	4:77220745-77222489:+1	protein-coding	myosin light chain 7	protein binding (GO:0005515) | calcium ion binding (GO:0005509)	unknown	dendritic spine (GO:0043197) | A band (GO:0031672)	5.466	2.955	684.552	15198.6	13544.5	2594.18	1730.64	0
PLN	CMD1P | CMH18 | PLB | PLB1 | Plb | Plm | cmd1p | plb | si:ch211-260o22.1	ENSOARG00000019971	101102067	8:19475995-19476150:-1	protein-coding	phospholamban	calcium channel regulator activity (GO:0005246) | protein binding (GO:0005515) | ATPase inhibitor activity (GO:0042030)	negative regulation of calcium ion binding (GO:1901877) | negative regulation of calcium ion transport (GO:0051926) | negative regulation of calcium-transporting ATPase activity (GO:1901895) | negative regulation of calcium ion transmembrane transporter activity (GO:1901020) | cellular calcium ion homeostasis (GO:0006874) | regulation of the force of heart contraction (GO:0002026) | calcium ion t…	mitochondrial membrane (GO:0031966) | membrane (GO:0016020) | endoplasmic reticulum (GO:0005783) | sarcoplasmic reticulum (GO:0016529) | sarcoplasmic reticulum membrane (GO:0033017) | endoplasmic reticulum membrane (GO:0005789) | calcium ion-transporting ATPase complex (GO:0090534) | mitochondrion (GO:0005739)	134.233	214.246	2284.26	12229.8	12568.5	9606.37	14896	1923.63
MYL2	CMH10 | G2 | MLC-2 | MLC-2A | MLC-2s/v | MLC-2v | MLC2 | MLC2V | Mlc-2 | Mlc2 | Mlc2v | Mylpc | XMLC2 | cmh10 | mlc2	ENSOARG00000017779	100196904	17:54295568-54303068:-1	protein-coding	myosin light chain 2	protein binding (GO:0005515) | calcium ion binding (GO:0005509) | actin monomer binding (GO:0003785)	post-embryonic development (GO:0009791) | muscle cell fate specification (GO:0042694) | negative regulation of cell growth (GO:0030308) | positive regulation of the force of heart contraction (GO:0098735) | heart development (GO:0007507) | heart morphogenesis (GO:0003007) | ventricular cardiac muscle tissue morphogenesis (GO:0055010) | cardiac muscle contraction (GO:0060048) | muscle fiber develo…	cytoskeleton (GO:0005856) | actin cytoskeleton (GO:0015629) | myofibril (GO:0030016)	38.133	3.866	2531.13	79.788	116.41	2915.24	12477	2591.33
MB	AI325109 | MG | PVALB | myg | myoglobgin | zgc:65819 | zgc:77764	ENSOARG00000018639	780509	3:178866680-178877963:-1	protein-coding	myoglobin	iron ion binding (GO:0005506) | heme binding (GO:0020037) | oxygen transporter activity (GO:0005344) | metal ion binding (GO:0046872) | oxygen binding (GO:0019825)	response to hypoxia (GO:0001666) | transport (GO:0006810) | heart development (GO:0007507) | enucleate erythrocyte differentiation (GO:0043353) | brown fat cell differentiation (GO:0050873) | oxygen transport (GO:0015671)	extracellular exosome (GO:0070062)	14.885	2.882	1576.52	6047.93	6594.82	4621.41	11353.3	7289.07
ND6	MTND6 | MtOm_00037 | NADH 6 | NADH-6 | NADH6 | VN03_33 | mtnd6 | nad6 | nd6 | ndh-U6	ENSOARG00000000033	808259	MT:13558-14085:-1	protein-coding	NADH-ubiquinone oxidoreductase chain 6	oxidoreductase activity (GO:0016491) | NADH dehydrogenase (ubiquinone) activity (GO:0008137)	oxidation-reduction process (GO:0055114)	integral component of membrane (GO:0016021) | respiratory chain (GO:0070469) | mitochondrial membrane (GO:0031966) | membrane (GO:0016020) | mitochondrion (GO:0005739)	1985.72	1791.99	2438.87	8546.23	9833	6341.96	7841.66	1901.41
ENSOARG00000008601	.	ENSOARG00000008601	.	21:49823577-49824875:+1	protein-coding	cytochrome c oxidase, subunit VIIIb	cytochrome-c oxidase activity (GO:0004129)	hydrogen ion transmembrane transport (GO:1902600)	mitochondrion (GO:0005739)	5.02	2.281	1239.49	6234.28	5224.08	7608.03	9714.19	5173.44
TNNI3	CMD1FF | CMD2A | CMH7 | RCM1 | TNNC1 | Tn1 | TnI | TnIc | XTnIc | XcTnI | c-troponin | cTNI | cTNT | cTnI | cmh7 | ctnIc | ctni | tnnc1	ENSOARG00000001811	101121961	14:59539421-59543303:+1	protein-coding	troponin I3, cardiac type	calcium channel inhibitor activity (GO:0019855) | protein binding (GO:0005515) | troponin T binding (GO:0031014) | actin binding (GO:0003779) | troponin C binding (GO:0030172) | protein kinase binding (GO:0019901) | calcium-dependent protein binding (GO:0048306) | protein domain specific binding (GO:0019904)	regulation of systemic arterial blood pressure by ischemic conditions (GO:0001980) | regulation of muscle contraction (GO:0006937) | heart development (GO:0007507) | cellular calcium ion homeostasis (GO:0006874) | ventricular cardiac muscle tissue morphogenesis (GO:0055010) | cardiac muscle contraction (GO:0060048) | vasculogenesis (GO:0001570) | heart contraction (GO:0060047) | striated muscle c…	sarcomere (GO:0030017) | troponin complex (GO:0005861)	9.757	2.929	1328.53	5189.7	4689.54	5364.24	9405.17	5.132
ACTC1	ACTC | ASD5 | Actc-1 | CMD1R | CMH11 | LVNC4 | acta1 | acta1b | actc | actna1 | cmd1r	ENSOARG00000019993	101111554	7:27279050-27284876:-1	protein-coding	actin, alpha, cardiac muscle 1	ATP binding (GO:0005524) | protein binding (GO:0005515) | ATPase activity (GO:0016887) | myosin binding (GO:0017022)	negative regulation of apoptotic process (GO:0043066) | actin-myosin filament sliding (GO:0033275) | actin-mediated cell contraction (GO:0070252) | actomyosin structure organization (GO:0031032) | skeletal muscle thin filament assembly (GO:0030240) | heart contraction (GO:0060047) | actin filament-based movement (GO:0030048) | cardiac muscle tissue morphogenesis (GO:0055008) | cardiac myofibril a…	actomyosin, actin portion (GO:0042643) | extracellular space (GO:0005615) | membrane (GO:0016020) | I band (GO:0031674) | extracellular exosome (GO:0070062) | blood microparticle (GO:0072562) | focal adhesion (GO:0005925) | actin filament (GO:0005884) | cytoplasm (GO:0005737) | sarcomere (GO:0030017)	14.7	3.999	1088.24	7098.68	6776.09	7039.32	8290.42	83.849
B2M	Aotus-B2m | B2MG | IMD43 | Ly-m11 | b-2-m | b2m-W01 | b2m-W03 | b2m-Z01 | b2m-Z02 | b2m-Z03 | beta2-m | beta2m | bwm | wu:fa94c05 | wu:fb10a09	ENSOARG00000003782	443295	7:99939442-99944153:+1	protein-coding	beta-2-microglobulin	identical protein binding (GO:0042802) | protein binding (GO:0005515) | glycoprotein binding (GO:0001948)	antibacterial humoral response (GO:0019731) | negative regulation of neuron projection development (GO:0010977) | antigen processing and presentation of endogenous peptide antigen via MHC class I (GO:0019885) | positive regulation of transferrin receptor binding (GO:1904437) | response to molecule of bacterial origin (GO:0002237) | positive regulation of receptor-mediated endocytosis (GO:0048260)…	extracellular space (GO:0005615) | Golgi apparatus (GO:0005794) | plasma membrane (GO:0005886) | membrane (GO:0016020) | extracellular exosome (GO:0070062) | extracellular region (GO:0005576) | MHC class I protein complex (GO:0042612) | external side of plasma membrane (GO:0009897) | HFE-transferrin receptor complex (GO:1990712) | focal adhesion (GO:0005925) | cytoplasm (GO:0005737)	6585.91	8171.15	7266.5	4049.8	4131.81	3329.69	2851.82	2885.92
ENSOARG00000018666	.	ENSOARG00000018666	101106848	7:16134652-16136798:+1	protein-coding	Uncharacterized protein	structural constituent of ribosome (GO:0003735)	translational elongation (GO:0006414)	intracellular (GO:0005622) | intracellular ribonucleoprotein complex (GO:0030529) | ribosome (GO:0005840)	7971.77	6315.33	6412.28	3117.64	2712.93	2302.33	3374.89	5232.67
ENSOARG00000006149	.	ENSOARG00000006149	101120236	8:82783-84915:-1	protein-coding	Elongation factor 1-alpha	GTPase activity (GO:0003924) | translation elongation factor activity (GO:0003746) | nucleotide binding (GO:0000166) | GTP binding (GO:0005525)	translational elongation (GO:0006414)	cytoplasm (GO:0005737)	7853.85	7120.63	6355.73	1260.61	1344.53	855.681	652.657	727.41
ND5	MTND5 | MtOm_00026 | NAD5 | NADH 5 | NADH-5 | NADH5 | VN03_27 | mtnd5 | nad5 | nd1-i2 | nd5 | ndh-U5	ENSOARG00000000032	808258	MT:11754-13574:+1	protein-coding	NADH-ubiquinone oxidoreductase chain 5	oxidoreductase activity (GO:0016491) | NADH dehydrogenase (ubiquinone) activity (GO:0008137)	ATP synthesis coupled electron transport (GO:0042773) | oxidation-reduction process (GO:0055114)	integral component of membrane (GO:0016021) | respiratory chain (GO:0070469) | mitochondrial respiratory chain complex I (GO:0005747) | membrane (GO:0016020) | mitochondrion (GO:0005739) | mitochondrial inner membrane (GO:0005743)	1847.62	1633.33	2218.72	7241.29	7826.03	5625.04	6452.85	1629.83
ACTA1	AA959943 | ACTA | ACTC1 | ASMA | Acta-2 | Acts | Actsk-1 | CFTD | CFTD1 | CFTDM | MPFD | NEM1 | NEM2 | NEM3 | SHPM | acta | acta2 | asma | cftd | cftd1 | cftdm | mpfd | nem1 | nem2 | nem3	ENSOARG00000003044	101107662	25:773585-776063:-1	protein-coding	actin, alpha 1, skeletal muscle	ATP binding (GO:0005524) | protein binding (GO:0005515) | nucleotide binding (GO:0000166)	skeletal muscle thin filament assembly (GO:0030240) | positive regulation of gene expression (GO:0010628) | skeletal muscle fiber development (GO:0048741) | mesenchyme migration (GO:0090131)	extracellular space (GO:0005615) | filopodium (GO:0030175) | cell body (GO:0044297) | actin cytoskeleton (GO:0015629) | extracellular exosome (GO:0070062) | blood microparticle (GO:0072562) | striated muscle thin filament (GO:0005865) | stress fiber (GO:0001725) | actin filament (GO:0005884) | lamellipodium (GO:0030027) | cytoplasm (GO:0005737) | sarcomere (GO:0030017)	3.576	1.248	321.403	82.532	97.704	347.468	302.546	7771.35
TNNC1	AI874626 | CMD1Z | CMH13 | PCTNC1 | TN-C | TNC | TNNC | TnC | Tncc | cTnC | cTnI | cmd1z | cmh13 | tnc | tncc | tnnc	ENSOARG00000004312	101111132	19:48403558-48406316:+1	protein-coding	troponin C1, slow skeletal and cardiac type	protein binding (GO:0005515) | troponin T binding (GO:0031014) | calcium ion binding (GO:0005509) | protein homodimerization activity (GO:0042803) | calcium-dependent protein binding (GO:0048306) | actin filament binding (GO:0051015) | troponin I binding (GO:0031013)	cardiac muscle contraction (GO:0060048) | regulation of muscle filament sliding speed (GO:0032972) | regulation of muscle contraction (GO:0006937) | transition between fast and slow fiber (GO:0014883) | regulation of ATPase activity (GO:0043462) | ventricular cardiac muscle tissue morphogenesis (GO:0055010)	actin cytoskeleton (GO:0015629) | mitochondrion (GO:0005739) | nucleoplasm (GO:0005654) | troponin complex (GO:0005861)	11.376	3.052	1187.19	3692.89	3070.26	1905.92	7535.95	2365.75
ENSOARG00000018603	.	ENSOARG00000018603	.	JH921762.1:10769-10885:+1	protein-coding	Uncharacterized protein	transporter activity (GO:0005215)	transport (GO:0006810) | lipid metabolic process (GO:0006629)	unknown	7382.65	4485.92	5488.26	1065.36	1775.73	595.032	469.87	84.735
ENSOARG00000019419	.	ENSOARG00000019419	.	2:217646580-217647153:+1	protein-coding	Uncharacterized protein	unknown	unknown	unknown	5674.48	6834.94	7027.32	3286.7	4409.47	1177.53	1414.84	984.9
ENSOARG00000016080	.	ENSOARG00000016080	.	13:56669291-56671144:+1	protein-coding	ATP synthase, H+ transporting, mitochondrial F1 complex, epsilon subunit	proton-transporting ATP synthase activity, rotational mechanism (GO:0046933) | proton-transporting ATPase activity, rotational mechanism (GO:0046961)	ATP synthesis coupled proton transport (GO:0015986)	mitochondrial proton-transporting ATP synthase complex, catalytic core F(1) (GO:0000275) | mitochondrion (GO:0005739) | mitochondrial inner membrane (GO:0005743)	2488.33	2654.03	3048.76	5409.25	4808.16	5662.16	6764.36	4962.11
MYLPF	2410014J02Rik | DTNB | G2 | HUMMLC2B | LC2f | MLC-2 | MLC2 | MRLC2 | MYL11 | Mlc2 | Myl2 | Myolc1 | SkMLC | mlc-2 | myl2 | mylz2	ENSOARG00000006071	100270715	24:26577862-26579570:+1	protein-coding	myosin light chain, phosphorylatable, fast skeletal muscle	calcium ion binding (GO:0005509) | structural constituent of muscle (GO:0008307)	skeletal muscle tissue development (GO:0007519)	lysosomal membrane (GO:0005765)	0.34	0.508	0.544	0.236	0.22	0.047	0.433	6214.7
VIM	CTRCT30 | DESMB | HEL113 | cb28 | vime	ENSOARG00000011328	443105	13:30747528-30755046:+1	protein-coding	vimentin	protein binding (GO:0005515) | structural constituent of eye lens (GO:0005212) | structural constituent of cytoskeleton (GO:0005200) | glycoprotein binding (GO:0001948) | protein C-terminus binding (GO:0008022) | keratin filament binding (GO:1990254) | structural molecule activity (GO:0005198) | identical protein binding (GO:0042802) | scaffold protein binding (GO:0097110) | double-stranded RNA b…	negative regulation of neuron projection development (GO:0010977) | Bergmann glial cell differentiation (GO:0060020) | astrocyte development (GO:0014002) | intermediate filament-based process (GO:0045103) | lens fiber cell development (GO:0070307) | SMAD protein signal transduction (GO:0060395) | positive regulation of gene expression (GO:0010628) | intermediate filament organization (GO:0045109)	intermediate filament (GO:0005882) | cell projection (GO:0042995) | neuron projection (GO:0043005) | cytoskeleton (GO:0005856) | intermediate filament cytoskeleton (GO:0045111) | plasma membrane (GO:0005886) | peroxisome (GO:0005777) | extracellular exosome (GO:0070062) | focal adhesion (GO:0005925) | cytosol (GO:0005829) | cytoplasm (GO:0005737) | cell leading edge (GO:0031252)	4865.09	6070.98	4356.84	716.097	902.924	397.487	361.94	328.134
ENSOARG00000014339	.	ENSOARG00000014339	.	21:39823812-39886786:-1	protein-coding	ferritin heavy chain	metal ion binding (GO:0046872) | ferric iron binding (GO:0008199)	iron ion transport (GO:0006826) | cellular iron ion homeostasis (GO:0006879)	cell (GO:0005623)	5450.95	5158.4	6047.43	2598.93	2688.04	2593	2576.06	2905.45
NPPA	ANF | ANP | ATFB6 | ATRST2 | Anf | CDD | CDD-ANF | CDP | PND | Pnd | RATANF | anf | anp | bnp | hm:zeh1304 | nppb | zeh1304	ENSOARG00000018229	.	12:39969236-39971270:+1	protein-coding	natriuretic peptide A	neuropeptide receptor binding (GO:0071855) | protein binding (GO:0005515) | receptor binding (GO:0005102) | neuropeptide hormone activity (GO:0005184) | hormone activity (GO:0005179)	positive regulation of delayed rectifier potassium channel activity (GO:1902261) | cGMP biosynthetic process (GO:0006182) | cardiac muscle hypertrophy in response to stress (GO:0014898) | positive regulation of cardiac muscle contraction (GO:0060452) | neuropeptide signaling pathway (GO:0007218) | positive regulation of potassium ion export across plasma membrane (GO:1903766) | regulation of atri…	extracellular space (GO:0005615) | cytoplasm (GO:0005737) | extracellular region (GO:0005576)	1.229	0.108	42.524	5982.11	5220.38	522.017	74.677	0
TPM1 (assigned to ENSOARG00000020797)	.	ENSOARG00000020797	100145865	7:44019267-44048143:-1	protein-coding	tropomyosin 1 (alpha)	unknown	unknown	unknown	140.438	127.679	935.462	4854.71	4594.56	4469.75	5955.77	3013.75
CST3	ARMD11 | CYSC | CysC | Cystatin | Cystatin-C | HEL-S-2 | armd11 | fb51d07 | wu:fb24g06 | wu:fb51d07 | wu:fc55f03 | zgc:136227	ENSOARG00000006202	101104079	13:41296119-41299663:-1	protein-coding	cystatin C precursor	cysteine-type endopeptidase inhibitor activity (GO:0004869) | peptidase inhibitor activity (GO:0030414)	negative regulation of endopeptidase activity (GO:0010951) | negative regulation of peptidase activity (GO:0010466)	unknown	3711.3	5918.92	4308.91	831.168	796.625	569.246	500.479	508.056
DCN	CSCD | DC | DSPG2 | PG40 | PGII | PGS2 | SLRR1B | cscd | dspg2 | pg40 | pgii | pgs2 | slrr1b	ENSOARG00000015737	443048	3:127427409-127458485:-1	protein-coding	decorin	glycosaminoglycan binding (GO:0005539) | protein binding (GO:0005515) | extracellular matrix binding (GO:0050840) | poly(A) RNA binding (GO:0044822) | collagen binding (GO:0005518)	negative regulation of vascular endothelial growth factor signaling pathway (GO:1900747) | positive regulation of mitochondrial fission (GO:0090141) | positive regulation of phosphatidylinositol 3-kinase signaling (GO:0014068) | positive regulation of transcription from RNA polymerase II promoter (GO:0045944) | positive regulation of autophagy (GO:0010508) | positive regulation of mitochondrial d…	extracellular space (GO:0005615) | extracellular matrix (GO:0031012)	5826.95	3241.84	3397.58	647.421	909.621	636.122	444.589	516.201
ENSOARG00000020259	.	ENSOARG00000020259	100037664	1:188445366-188448530:-1	protein-coding	Uncharacterized protein	structural constituent of ribosome (GO:0003735)	translation (GO:0006412)	intracellular (GO:0005622) | ribosome (GO:0005840)	5777.7	5236.42	4406.2	1500.58	1599.15	1344.04	1291.46	1726.85
TPM2	AMCD1 | BRT-2 | DA1 | DA2B | HEL-S-273 | NEM4 | TMSB | TPM3 | Tpm-2 | Trop-2 | beta-TMad | beta-TMemb | cb836 | fb68h02 | nem4 | tpm4l | wu:fb68h02 | wu:fj63f03 | zgc:86810	ENSOARG00000011889	101114931	2:52537459-52544952:+1	protein-coding	tropomyosin 2 (beta)	actin binding (GO:0003779) | protein binding (GO:0005515)	regulation of ATPase activity (GO:0043462)	unknown	75.796	51.11	210.364	1478.53	1089.74	566.079	1644.24	5753.21
LUM	LDC | Ldc | SLRR2D | ldc | slrr2d | zgc:86661	ENSOARG00000015727	101112967	3:127384837-127388852:-1	protein-coding	lumican	protein binding (GO:0005515) | collagen binding (GO:0005518)	positive regulation of transcription from RNA polymerase II promoter (GO:0045944) | visual perception (GO:0007601) | positive regulation of transforming growth factor beta1 production (GO:0032914) | collagen fibril organization (GO:0030199)	fibrillar collagen trimer (GO:0005583) | extracellular space (GO:0005615) | extracellular matrix (GO:0031012) | proteinaceous extracellular matrix (GO:0005578) | extracellular exosome (GO:0070062)	5712.09	3645.78	1888.88	381.766	551.794	398.545	209.226	202.979
ENSOARG00000012466	.	ENSOARG00000012466	101119721	5:41370852-41373257:-1	protein-coding	Uncharacterized protein	ubiquinol-cytochrome-c reductase activity (GO:0008121) | electron carrier activity (GO:0009055)	hydrogen ion transmembrane transport (GO:1902600)	unknown	563.375	588.73	1158.72	3870.46	3399.47	4022.31	5407.18	2379.27
ENSOARG00000018822	.	ENSOARG00000018822	.	12:78615346-78619318:+1	protein-coding	.	unknown	regulation of muscle contraction (GO:0006937)	troponin complex (GO:0005861)	6.497	1.762	850.74	4820.98	4470.61	3380.39	5388.17	0.883
COX7A1	COX | COX7A | COX7AH | COX7AM | VIIIC | VIIa-M | cox7a | cox7ah | cox7am | zgc:153177	ENSOARG00000005289	101121285	14:45928308-45929037:-1	protein-coding	cytochrome c oxidase subunit 7A1	electron carrier activity (GO:0009055) | cytochrome-c oxidase activity (GO:0004129)	hydrogen ion transmembrane transport (GO:1902600)	mitochondrial respiratory chain (GO:0005746) | mitochondrion (GO:0005739)	191.524	168.312	848.88	3941.47	3405.82	2706.15	5305.75	2042.14
TCAP	AI503981 | AJ223855 | CMD1N | CMH25 | LGMD2G | T-cap | TELE | Telethonin | telethonin	ENSOARG00000011575	101103739	11:39610875-39611610:+1	protein-coding	titin-cap	titin Z domain binding (GO:0070080) | titin binding (GO:0031432) | protein binding (GO:0005515) | ion channel binding (GO:0044325) | FATZ binding (GO:0051373) | protein binding, bridging (GO:0030674) | structural constituent of muscle (GO:0008307) | BMP binding (GO:0036122)	detection of muscle stretch (GO:0035995) | cardiac muscle hypertrophy in response to stress (GO:0014898) | skeletal muscle contraction (GO:0003009) | cardiac muscle hypertrophy (GO:0003300) | somitogenesis (GO:0001756) | skeletal muscle myosin thick filament assembly (GO:0030241) | otic vesicle formation (GO:0030916) | cardiac muscle fiber development (GO:0048739) | cardiac muscle contraction (GO…	Z disc (GO:0030018) | I band (GO:0031674)	19.514	13.695	677.72	3171.83	2733.06	1370.57	5254.99	1927.2
CRYAB	AACRYA | CMD1II | CRYA2 | CTPP2 | CTRCT16 | Crya-2 | Crya2 | HEL-S-101 | HSPB2 | HSPB5 | HspB5 | MFM2 | P23	ENSOARG00000015194	497274	15:21674873-21677754:-1	protein-coding	crystallin alpha B	identical protein binding (GO:0042802) | protein binding (GO:0005515) | structural constituent of eye lens (GO:0005212) | protein homodimerization activity (GO:0042803) | metal ion binding (GO:0046872) | unfolded protein binding (GO:0051082)	negative regulation of apoptotic process (GO:0043066) | muscle organ development (GO:0007517) | negative regulation of cysteine-type endopeptidase activity involved in apoptotic process (GO:0043154) | lens development in camera-type eye (GO:0002088) | negative regulation of gene expression (GO:0010629) | tubulin complex assembly (GO:0007021) | regulation of cell death (GO:0010941) | camera-type e…	contractile fiber (GO:0043292) | plasma membrane (GO:0005886) | extracellular exosome (GO:0070062) | Z disc (GO:0030018) | myelin sheath (GO:0043209) | nucleus (GO:0005634) | cytosol (GO:0005829) | cytoplasm (GO:0005737) | mitochondrion (GO:0005739)	362.891	272.962	1290.58	3346.26	3526.75	2284.86	4955.32	1863.5
RPL23A/ENSOARG:03480 (assigned to ENSOARG00000003480)	.	ENSOARG00000003480	100415774	11:19771126-19774188:+1	protein-coding	ribosomal protein L23a	nucleotide binding (GO:0000166) | structural constituent of ribosome (GO:0003735)	translation (GO:0006412)	intracellular (GO:0005622) | nucleus (GO:0005634) | intracellular ribonucleoprotein complex (GO:0030529) | ribosome (GO:0005840) | TORC2 complex (GO:0031932)	4849.34	4096.68	4528.19	1519.01	1522.25	1162.71	1314.14	1293.68
GAPDH/ENSOARG:07894	.	ENSOARG00000007894	443005	3:207818504-207822814:-1	protein-coding	glyceraldehyde-3-phosphate dehydrogenase	NADP binding (GO:0050661) | NAD binding (GO:0051287) | oxidoreductase activity (GO:0016491) | glyceraldehyde-3-phosphate dehydrogenase (NAD+) (phosphorylating) activity (GO:0004365) | oxidoreductase activity, acting on the aldehyde or oxo group of donors, NAD or NADP as acceptor (GO:0016620)	glycolytic process (GO:0006096) | oxidation-reduction process (GO:0055114) | glucose metabolic process (GO:0006006)	unknown	371.868	400.433	643.938	2263.74	2131.86	1555.41	2148.82	4841.95
RPS28	DBA15 | DDBDRAFT_0186596 | DDBDRAFT_0231067 | DDB_0186596 | DDB_0231067 | MHJ24.12 | MHJ24_12 | RIBOSOMAL PROTEIN S28 | RS28 | S28 | ribosomal protein S28 | wu:fb07a10 | wu:fb94f01 | zgc:73367	ENSOARG00000003689	.	5:14649840-14650640:+1	protein-coding	ribosomal protein S28	protein binding (GO:0005515) | poly(A) RNA binding (GO:0044822) | structural constituent of ribosome (GO:0003735)	translation (GO:0006412) | ribosomal small subunit biogenesis (GO:0042274) | ribosome biogenesis (GO:0042254) | rRNA processing (GO:0006364)	intracellular (GO:0005622) | small ribosomal subunit (GO:0015935) | cytoplasm (GO:0005737) | ribosome (GO:0005840) | extracellular exosome (GO:0070062) | cytosolic small ribosomal subunit (GO:0022627)	4627.46	4541.81	4840.75	2580.78	2440.43	1815.57	2627.79	1979.24
ENSOARG00000009703	.	ENSOARG00000009703	101104961	25:33587018-33588234:+1	protein-coding	.	nucleotide binding (GO:0000166) | structural constituent of ribosome (GO:0003735)	translation (GO:0006412)	intracellular (GO:0005622) | intracellular ribonucleoprotein complex (GO:0030529) | ribosome (GO:0005840)	4832.88	4605.6	4439.86	1655.29	1646.45	2253.61	1479.12	3365.56
OST4	2310016E02Rik | AGBL5 | DDBDRAFT_0206071 | DDBDRAFT_0233179 | DDB_0206071 | DDB_0233179 | p11f3	ENSOARG00000019491	.	3:34032587-34032697:-1	protein-coding	oligosaccharyltransferase complex subunit 4, non-catalytic	unknown	unknown	unknown	4644.72	4381.89	4137.41	2833.27	2813.93	1873.52	2915.46	1681.23
MYH7	AMHC1 | B-MHC | Bmyo | CMD1S | CMH1 | MPD1 | MYHCB | MyHC-I | MyHC-alpha | MyHC-beta | MyHC-slow | MyHCS | Myhc-b | Myhcb | Myosin-6 | Myosin-7 | OMYHCS | SPMD | SPMM | beta-MHC | cmd1s | cmh1 | mpd1 | myHC-beta | myHC-slow | myh6.2 | myhcb | myosin | myosin-7 | spmd | spmm	ENSOARG00000019316	442995	7:21105366-21157369:+1	protein-coding	myosin, heavy chain 7, cardiac muscle, beta	ATP binding (GO:0005524) | actin binding (GO:0003779) | protein binding (GO:0005515) | actin-dependent ATPase activity (GO:0030898) | motor activity (GO:0003774) | ATPase activity (GO:0016887) | nucleotide binding (GO:0000166) | microfilament motor activity (GO:0000146)	cardiac muscle hypertrophy in response to stress (GO:0014898) | skeletal muscle contraction (GO:0003009) | muscle filament sliding (GO:0030049) | regulation of the force of heart contraction (GO:0002026) | regulation of the force of skeletal muscle contraction (GO:0014728) | ventricular cardiac muscle tissue morphogenesis (GO:0055010) | cardiac muscle contraction (GO:0060048) | metabolic process …	myosin complex (GO:0016459) | stress fiber (GO:0001725) | cytoplasm (GO:0005737) | myofibril (GO:0030016) | myosin filament (GO:0032982) | Z disc (GO:0030018)	18.142	9.055	914.232	3701.37	3438.89	2364.48	4606.49	1423.91
ENSOARG00000014790	.	ENSOARG00000014790	101113728	2:100824898-100842211:-1	protein-coding	Clusterin	unknown	cell death (GO:0008219)	unknown	3938	4523.28	3017.48	177.147	161.42	50.577	55.197	94.545
ENSOARG00000006367	.	ENSOARG00000006367	101122593	4:19024265-19031348:-1	protein-coding	Uncharacterized protein	unknown	unknown	unknown	633.794	626.971	1171.01	3374.08	3292.05	3058.84	4519.87	2710.09
ENSOARG00000014536	.	ENSOARG00000014536	100037667	8:58022581-58025684:+1	protein-coding	.	structural constituent of ribosome (GO:0003735)	translation (GO:0006412)	intracellular (GO:0005622) | intracellular ribonucleoprotein complex (GO:0030529) | ribosome (GO:0005840)	4503.33	4280.93	3942.44	1258.7	1284.78	1746.81	1066.94	2179.61
CKM	CK | CKMM | Ckmm | M-CK | MCK | ckmm | m-ck	ENSOARG00000009785	101112841	14:52023707-52032525:-1	protein-coding	creatine kinase, M-type	protein binding (GO:0005515) | transferase activity, transferring phosphorus-containing groups (GO:0016772) | kinase activity (GO:0016301) | nucleotide binding (GO:0000166) | catalytic activity (GO:0003824) | ATP binding (GO:0005524) | transferase activity (GO:0016740) | creatine kinase activity (GO:0004111)	phosphocreatine biosynthetic process (GO:0046314) | phosphorylation (GO:0016310) | response to heat (GO:0009408)	extracellular space (GO:0005615)	1.176	0.425	447.139	1356.31	1227.16	1101.69	3449.95	4437.19
ENSOARG00000020353	.	ENSOARG00000020353	.	3:207627772-207627843:-1	protein-coding	Uncharacterized protein	unknown	unknown	unknown	3724.73	4175.49	2770.56	1159.14	1361.82	537.002	712.31	443.974
ENSOARG00000017031	.	ENSOARG00000017031	.	15:29117660-29117848:+1	protein-coding	Uncharacterized protein	cytochrome-c oxidase activity (GO:0004129)	hydrogen ion transmembrane transport (GO:1902600)	unknown	973.916	1214.38	1405.66	2831.42	2841.74	3092.97	4027.66	2609.22
RPS11	AKKNA01_0067 | AMQ82_0053 | AchyCp074 | AdReCp019 | AktrCp055 | AmbrCp074 | AmmaCp074 | AnodCp074 | AsterspCp054 | AstnaC_p053 | Atax.mt.25 | AvhoCp074 | AvsaCp074 | BaarC_p052 | BabaC_p052 | Bocu_g54 | BosaCp055 | Br_inPt0776 | BrmaCp074 | BrvuCp056 | BubaC_p053 | CG8857 | COESC_p055 | Cegl_g54 | ChliC_p052 | CqCP_p028 | DDBDRAFT_0204861 | DDBDRAFT_0230027 | DDB_0204861 | DDB_0230027 | DEOF_Cp05…	ENSOARG00000013191	100037666	14:54981354-54983763:+1	protein-coding	ribosomal protein S11	protein binding (GO:0005515) | poly(A) RNA binding (GO:0044822) | structural constituent of ribosome (GO:0003735)	translation (GO:0006412)	nucleolus (GO:0005730) | membrane (GO:0016020) | ribosome (GO:0005840) | extracellular exosome (GO:0070062) | intracellular (GO:0005622) | intracellular ribonucleoprotein complex (GO:0030529) | focal adhesion (GO:0005925) | cytoplasm (GO:0005737) | cytosolic small ribosomal subunit (GO:0022627)	3882.28	3662.6	3581.36	1751.27	1570.52	1756.67	1627.87	2349.62
USMG5	2010301L15Rik | AGP | DAPIT | Dapit | HCVFTP2 | bA792D24.4	ENSOARG00000005290	.	13:64548116-64548289:-1	protein-coding	up-regulated during skeletal muscle growth 5 homolog (mouse)	unknown	unknown	mitochondrion (GO:0005739) | extracellular exosome (GO:0070062) | mitochondrial inner membrane (GO:0005743)	881.186	1019.48	1185.28	3376.18	3155.48	3166.16	3807.93	3011.09
ENSOARG00000013272	.	ENSOARG00000013272	101104219	3:100399789-100404375:-1	protein-coding	Uncharacterized protein	structural constituent of ribosome (GO:0003735)	translation (GO:0006412)	intracellular (GO:0005622) | ribosome (GO:0005840)	3770.61	3424.84	3401.05	1266.83	1231.24	1214.5	1158.17	1914.96
ENSOARG00000005761	.	ENSOARG00000005761	.	6:72423581-72437525:-1	protein-coding	.	protein binding (GO:0005515) | insulin-like growth factor binding (GO:0005520)	cell adhesion (GO:0007155) | regulation of cell growth (GO:0001558)	extracellular space (GO:0005615) | extracellular matrix (GO:0031012) | extracellular exosome (GO:0070062) | extracellular region (GO:0005576)	3721.48	2463.2	1880.16	717.626	1042.01	502.188	466.248	315.038
ENSOARG00000018812	.	ENSOARG00000018812	.	2:248877792-248877971:-1	protein-coding	.	filamin binding (GO:0031005) | protein binding (GO:0005515)	unknown	nucleus (GO:0005634) | actin cytoskeleton (GO:0015629) | cytoplasm (GO:0005737) | nucleoplasm (GO:0005654) | aggresome (GO:0016235) | mitochondrion (GO:0005739)	13.783	7.149	704.587	1961.47	2260.47	1922.76	3592.07	679.805
S100A4	18A2 | 42A | 42a | CAPL | Capl | FSP1 | FSp1 | MTS1 | Mts1 | P9KA | P9ka | PEL98 | PeL98 | RNP9KA | metastasin | pk9a	ENSOARG00000000641	.	1:102575035-102577340:-1	protein-coding	S100 calcium binding protein A4	identical protein binding (GO:0042802) | protein binding (GO:0005515) | calcium ion binding (GO:0005509) | metal ion binding (GO:0046872) | poly(A) RNA binding (GO:0044822) | RAGE receptor binding (GO:0050786)	positive regulation of I-kappaB kinase/NF-kappaB signaling (GO:0043123)	nucleus (GO:0005634) | extracellular space (GO:0005615) | perinuclear region of cytoplasm (GO:0048471) | extracellular exosome (GO:0070062)	3426.38	3299.08	2097.09	287.158	217.071	14.856	31.687	114.976
COX6B1	2010000G05Rik | COX6B | COXG | COXVIb1 | Cox6b | GB18028 | RGD1565270 | cox6b | coxg | coxvib1 | fa92g05 | si:dkey-161j23.2 | wu:fa92g05 | zgc:92631	ENSOARG00000004946	101121538	14:45499174-45505755:+1	protein-coding	cytochrome c oxidase subunit 6B1	cytochrome-c oxidase activity (GO:0004129)	substantia nigra development (GO:0021762) | hydrogen ion transmembrane transport (GO:1902600)	mitochondrion (GO:0005739) | mitochondrial inner membrane (GO:0005743)	707.106	727.049	1046.08	2304.53	2063.75	2560.35	3390.11	2369.26
TNNC2	STNC | TNCC2 | TPCS | Tncs | tnnc | wu:fb39a12	ENSOARG00000006566	.	13:74136455-74137506:-1	protein-coding	troponin C2, fast skeletal type	actin binding (GO:0003779) | protein binding (GO:0005515) | calcium ion binding (GO:0005509)	skeletal muscle contraction (GO:0003009)	troponin complex (GO:0005861)	1.401	0.949	1.22	0.751	0.776	0.173	1.141	3378.52
RPS8	AKKNA01_0070 | AMQ82_0056 | AchyCp077 | AdReCp016 | AktrCp058 | AmbrCp077 | AmmaCp077 | AnodCp077 | AsterspCp057 | AstnaC_p055 | AvhoCp077 | AvsaCp077 | BaarC_p055 | BabaC_p055 | BcDNA:RH06886 | BcDNA:SD17528 | Bocu_g57 | BosaCp058 | Br_inPt0787 | BrmaCp077 | BrvuCp059 | BubaC_p056 | CG7808 | COESC_p057 | Cegl_g57 | ChliC_p055 | CqCP_p026 | DDBDRAFT_0184097 | DDBDRAFT_0230025 | DDB_0184097 | DDB_…	ENSOARG00000001136	101117800	1:19227521-19230058:+1	protein-coding	ribosomal protein S8	poly(A) RNA binding (GO:0044822) | structural constituent of ribosome (GO:0003735)	translation (GO:0006412)	membrane (GO:0016020) | ribosome (GO:0005840) | extracellular exosome (GO:0070062) | intracellular (GO:0005622) | intracellular ribonucleoprotein complex (GO:0030529) | nucleus (GO:0005634) | focal adhesion (GO:0005925) | cytoplasm (GO:0005737) | cytosolic small ribosomal subunit (GO:0022627)	3259.36	3366.03	3101.36	1283.52	1258.91	1186.05	1139.26	1294.74
ENSOARG00000010029	.	ENSOARG00000010029	101121360	11:39016458-39020292:-1	protein-coding	.	structural constituent of ribosome (GO:0003735)	translation (GO:0006412)	intracellular ribonucleoprotein complex (GO:0030529) | ribosome (GO:0005840)	2983.3	3317.07	2815.57	963.231	1028.8	1222.9	929.287	1715.63
ENSOARG00000020185	.	ENSOARG00000020185	101117308	2:220325615-220332415:+1	protein-coding	.	structural molecule activity (GO:0005198)	unknown	intermediate filament (GO:0005882)	13.841	5.97	326.655	1500.06	1277.46	928.472	1324.44	3091.54
RPS21	1810049N11Rik | 2410030A14Rik | CG2986 | DDBDRAFT_0219871 | DDBDRAFT_0231061 | DDB_0219871 | DDB_0231061 | Dmel\CG2986 | HLDF | M(2)23B | S21 | l(2)03575 | l(2)168/14 | l(2)k16814 | oho23 | oho23B | rpS21 | zgc:56642 | zgc:86816	ENSOARG00000013126	101112152	13:54178685-54179573:-1	protein-coding	ribosomal protein S21	protein N-terminus binding (GO:0047485) | poly(A) RNA binding (GO:0044822) | structural constituent of ribosome (GO:0003735)	translation (GO:0006412)	intracellular (GO:0005622) | small ribosomal subunit (GO:0015935) | intracellular ribonucleoprotein complex (GO:0030529) | cytoplasm (GO:0005737) | ribosome (GO:0005840) | cytosolic small ribosomal subunit (GO:0022627)	3076.36	3081.72	2985.24	1092.4	1091.44	904.858	1034.56	1255.23
ENSOARG00000010582	.	ENSOARG00000010582	100270789	11:39269259-39272121:+1	protein-coding	.	structural constituent of ribosome (GO:0003735)	translation (GO:0006412)	intracellular (GO:0005622) | intracellular ribonucleoprotein complex (GO:0030529) | ribosome (GO:0005840)	3080.91	2777.07	2878.81	1129.69	1099.1	1016.51	953.249	1256.72
ENSOARG00000007855	.	ENSOARG00000007855	780467	6:16785400-16790036:-1	protein-coding	Uncharacterized protein	structural constituent of ribosome (GO:0003735)	translation (GO:0006412)	intracellular (GO:0005622) | ribosome (GO:0005840)	3053.31	2771.54	2646.18	842.768	873.33	892.023	744.779	1367.1
RPS27A	0610006J14Rik | CEP80 | CG5271 | DUb80 | Dmel\CG5271 | Dub80 | GB11227 | HEL112 | S27A | UB3-D | UBA80 | UBC | UBCEP1 | UBCEP80 | UBI2 | Uba52 | Ubb | Ubc | Ubi-f80 | Ubi-m | Ubiq | Ubiz | Uerps27a | hm:zeh0386 | ik:tdsubc_1f2 | l(2)04820 | l(2)31Ei | mfs(2)31 | mfs(2)48 | mfs48 | tdsubc_1f2 | xx:tdsubc_1f2 | zgc:66168	ENSOARG00000002624	.	3:68703907-68706233:-1	protein-coding	ribosomal protein S27a	protein binding (GO:0005515) | poly(A) RNA binding (GO:0044822) | structural constituent of ribosome (GO:0003735)	translation (GO:0006412)	extracellular space (GO:0005615) | nucleolus (GO:0005730) | membrane (GO:0016020) | ribosome (GO:0005840) | extracellular exosome (GO:0070062) | myelin sheath (GO:0043209) | small ribosomal subunit (GO:0015935) | nucleus (GO:0005634) | cytoplasm (GO:0005737) | cytosolic small ribosomal subunit (GO:0022627)	2966.8	2837.64	2572.68	929.079	940.924	961.036	799.531	1346.92
ENSOARG00000001275	.	ENSOARG00000001275	.	JH922463.1:28272-30805:+1	protein-coding	.	protein binding (GO:0005515) | metal ion binding (GO:0046872) | zinc ion binding (GO:0008270)	hemopoiesis (GO:0030097) | positive regulation of cell proliferation (GO:0008284)	extracellular matrix (GO:0031012) | cell cortex (GO:0005938)	1218.74	1806.26	1772.68	2953.16	2496.48	1400.2	2549.74	109.902
RPS3A/ENSOARG:20231 (assigned to ENSOARG00000020231)	C3 | CG2168 | DDBDRAFT_0217947 | DDBDRAFT_0230021 | DDB_0217947 | DDB_0230021 | Dmel\CG2168 | FTE1 | GB16500 | M(4)101 | M(4)57g | M(4)[57g] | M57g | MFTL | M[57g] | RPS3A | RPS3AE | RPS3a | RS3A | RpS3a | Rps3A | Rps3ae | Rsp3A | S3A | anon-EST:Liang-2.29 | chr4:86830..87021 | chr4:87101..87234 | chr4:87503..87595 | clone 2.29 | fb02h01 | fte-1 | fte1 | l(4)102ABa | mftl | rpS3Ae | wu:fb02h01 | …	ENSOARG00000020231	101116132	3:192371692-192372486:+1	protein-coding	ribosomal protein S3A	protein binding (GO:0005515) | poly(A) RNA binding (GO:0044822) | structural constituent of ribosome (GO:0003735)	negative regulation of apoptotic process (GO:0043066) | cell differentiation (GO:0030154) | translation (GO:0006412)	nucleolus (GO:0005730) | ribosome (GO:0005840) | extracellular exosome (GO:0070062) | intracellular (GO:0005622) | intracellular ribonucleoprotein complex (GO:0030529) | nucleus (GO:0005634) | focal adhesion (GO:0005925) | cytoplasm (GO:0005737) | cytosolic small ribosomal subunit (GO:0022627)	2923.52	2296.67	2465.39	795.693	746.387	818.011	671.317	922.392
SLC25A4	AAC1 | ANT | ANT 1 | ANT1 | AU019225 | Ant1 | MTDPS12 | PEO2 | PEO3 | PEOA2 | SLC25A5 | T1 | ant | ant1 | ants254 | fa22e07 | peo2 | peo3 | wu:fa22e07 | zgc:77591	ENSOARG00000007666	100147787	26:14223802-14227499:+1	protein-coding	Ovis aries solute carrier family 25 (mitochondrial carrier; adenine nucleotide translocator), member 4 (SLC25A4), mRNA.	protein binding (GO:0005515) | transporter activity (GO:0005215)	negative regulation of necroptotic process (GO:0060546) | transport (GO:0006810) | apoptotic mitochondrial changes (GO:0008637) | transmembrane transport (GO:0055085)	myelin sheath (GO:0043209) | integral component of membrane (GO:0016021) | nucleus (GO:0005634) | membrane (GO:0016020) | mitochondrion (GO:0005739) | mitochondrial inner membrane (GO:0005743)	64.876	56.767	405.321	2119.81	2037.52	1790.35	2854.28	1530.67
UQCR10	1110020P15Rik | AA960494 | HSPC051 | HSPC119 | HSPC151 | QCR9 | UCCR7.2 | UCRC | Ucrc | qcr9 | ucrc	ENSOARG00000005560	101108778	17:68430407-68432223:+1	protein-coding	ubiquinol-cytochrome c reductase, complex III subunit X	unknown	mitochondrial electron transport, ubiquinol to cytochrome c (GO:0006122)	mitochondrion (GO:0005739) | extracellular exosome (GO:0070062) | mitochondrial inner membrane (GO:0005743) | mitochondrial respiratory chain complex III (GO:0005750)	598.948	656.288	876.658	1932.61	1729.6	2297.42	2758.54	2755.28
RPS19	AKKNA01_0075 | AMQ82_0061 | AMQ82_0092 | AchyCp082 | AchyCp131 | AdReCp011 | AktrCp063 | AktrCp087 | AmbrCp082 | AmbrCp131 | AmmaCp082 | AmmaCp131 | AnodCp082 | AnodCp131 | AsterspCp062 | AstnaC_p059 | AvhoCp082 | AvhoCp131 | AvsaCp082 | AvsaCp131 | BaarC_p060 | BaarC_p082 | BabaC_p060 | BabaC_p082 | Bocu_g62 | Bocu_g87 | BosaCp063 | BosaCp095 | Br_inPt0827 | BrmaCp082 | BrmaCp131 | BrvuCp064 | B…	ENSOARG00000008365	101106101	14:50414657-50422495:-1	protein-coding	ribosomal protein S19	protein binding (GO:0005515) | fibroblast growth factor binding (GO:0017134) | protein homodimerization activity (GO:0042803) | poly(A) RNA binding (GO:0044822) | protein kinase binding (GO:0019901) | structural constituent of ribosome (GO:0003735)	ribosomal small subunit assembly (GO:0000028) | negative regulation of respiratory burst involved in inflammatory response (GO:0060266) | erythrocyte differentiation (GO:0030218) | rRNA processing (GO:0006364) | protein tetramerization (GO:0051262) | monocyte chemotaxis (GO:0002548) | maturation of SSU-rRNA (GO:0030490) | positive regulation of respiratory burst involved in inflammatory response …	nucleolus (GO:0005730) | membrane (GO:0016020) | ribosome (GO:0005840) | extracellular exosome (GO:0070062) | intracellular (GO:0005622) | focal adhesion (GO:0005925) | cytosol (GO:0005829) | cytoplasm (GO:0005737) | cytosolic small ribosomal subunit (GO:0022627)	2740.22	2655.21	2626.84	873.3	845.264	918.788	870.128	840.295
RPL32	143250_at | AKKNA01_0114 | AMQ82_0074 | AU020185 | AchyCp103 | AdReCp080 | AktrCp071 | AmbrCp103 | AmmaCp103 | AnodCp103 | AsterspCp079 | AstnaC_p075 | AvhoCp103 | AvsaCp103 | BabaC_p068 | BcDNA:RH03940 | Bocu_g70 | BosaCp075 | Br_inPt1238 | BrmaCp103 | BrvuCp072 | BubaC_p070 | CG7939 | COESC_p070 | Cegl_g70 | ChliC_p068 | CqCP_p015 | DDBDRAFT_0168588 | DDBDRAFT_0231150 | DDB_0168588 | DDB_023115…	ENSOARG00000014949	443070	19:56202795-56206018:+1	protein-coding	ribosomal protein L32	poly(A) RNA binding (GO:0044822) | structural constituent of ribosome (GO:0003735)	translation (GO:0006412)	cytosolic large ribosomal subunit (GO:0022625) | intracellular (GO:0005622) | membrane (GO:0016020) | ribosome (GO:0005840)	2736.46	2567.94	2590.01	862.706	896.573	902.551	742.064	1337.06
ATP5I	ATP5K | Atp5k | GB12090 | RBF | RPF-1 | atp5k	ENSOARG00000008425	.	2:64326807-64327019:+1	protein-coding	ATP synthase, H+ transporting, mitochondrial Fo complex subunit E	ATPase activity (GO:0016887) | hydrogen ion transmembrane transporter activity (GO:0015078)	ATP synthesis coupled proton transport (GO:0015986)	mitochondrial proton-transporting ATP synthase complex (GO:0005753) | mitochondrion (GO:0005739) | mitochondrial proton-transporting ATP synthase complex, coupling factor F(o) (GO:0000276)	910.156	953.697	1208.43	2333.59	1953.26	1890.26	2732.06	1845.1
ENSOARG00000019826	.	ENSOARG00000019826	101123533	2:237679017-237679295:+1	protein-coding	.	structural constituent of ribosome (GO:0003735)	translation (GO:0006412)	intracellular (GO:0005622) | ribosome (GO:0005840)	2731.76	2634.36	2503.01	1155.66	1167.5	855.001	1135.29	1249.66
ENSOARG00000013275	.	ENSOARG00000013275	.	3:10979613-10983240:+1	protein-coding	Uncharacterized protein	structural constituent of ribosome (GO:0003735)	translation (GO:0006412)	intracellular (GO:0005622) | ribosome (GO:0005840)	2640.23	2586.19	2504.82	1153.56	1063.95	1051.22	1075.51	1500.33
KERA	CNA2 | KTN | Lumican | SLRR2B | si:dkeyp-38g8.3 | zgc:136259	ENSOARG00000015715	101112715	3:127342096-127348559:-1	protein-coding	keratocan	protein binding (GO:0005515)	cornea development in camera-type eye (GO:0061303)	unknown	2639.69	1330.86	1773.55	100.33	159.162	151.86	15.196	527.582
UQCRH	2210416J04Rik | 2310021J10Rik | 2610041P16Rik | DDBDRAFT_0203632 | DDBDRAFT_0233077 | DDB_0203632 | DDB_0233077 | QCR6 | UQCR8 | im:7141026 | qcr6 | uqcr8 | zgc:123330	ENSOARG00000014747	100270719	22:3348127-3348402:-1	protein-coding	cytochrome b-c1 complex subunit 6, mitochondrial	ubiquinol-cytochrome-c reductase activity (GO:0008121)	mitochondrial electron transport, ubiquinol to cytochrome c (GO:0006122) | hydrogen ion transmembrane transport (GO:1902600) | oxidation-reduction process (GO:0055114)	respiratory chain (GO:0070469) | membrane (GO:0016020) | mitochondrion (GO:0005739) | mitochondrial inner membrane (GO:0005743)	1233.88	1160.01	1382.39	2142.22	1979.58	1677.11	2604.59	1400.94
ADIRF	AFRO | APM2 | C10H10orf116 | C10orf116 | C12H10orf116 | C18H10orf116 | C1H10orf116 | C28H10orf116 | C4H10orf116 | CD2H10orf116 | apM-2	ENSOARG00000000741	.	25:41183169-41183539:+1	protein-coding	adipogenesis regulatory factor	unknown	positive regulation of transcription from RNA polymerase II promoter (GO:0045944) | cellular response to radiation (GO:0071478) | cellular response to cisplatin (GO:0072719) | regulation of response to drug (GO:2001023) | positive regulation of fat cell differentiation (GO:0045600)	nucleus (GO:0005634) | cytoplasm (GO:0005737) | nucleoplasm (GO:0005654) | extracellular exosome (GO:0070062)	1771.12	2598.92	1720.4	228.08	275.302	32.573	112.099	66.114
COX6A2	COX6AH | COXVIAH | CoxVIaH | VIaH | zgc:103594	ENSOARG00000009432	101106131	24:27474854-27475391:-1	protein-coding	cytochrome c oxidase subunit 6A2	cytochrome-c oxidase activity (GO:0004129)	hydrogen ion transmembrane transport (GO:1902600)	membrane (GO:0016020) | mitochondrion (GO:0005739) | mitochondrial inner membrane (GO:0005743) | mitochondrial respiratory chain complex IV (GO:0005751)	1.933	1.708	295.914	1628.61	1255.85	933.142	2577.24	812.096
RPL37/ENSOARG:04877 (assigned to ENSOARG00000004877)	.	ENSOARG00000004877	101115154	15:34964574-34965966:+1	protein-coding	ribosomal protein L37	RNA binding (GO:0003723) | rRNA binding (GO:0019843) | metal ion binding (GO:0046872) | structural constituent of ribosome (GO:0003735)	translation (GO:0006412)	intracellular (GO:0005622) | intracellular ribonucleoprotein complex (GO:0030529) | ribosome (GO:0005840)	2558.82	2416.92	2205.96	774.946	805.92	741.766	704.484	1175.24
RPL37/ENSOARG:05925 (assigned to ENSOARG00000005925)	.	ENSOARG00000005925	101115154	X:62098998-62099291:-1	protein-coding	ribosomal protein L37	RNA binding (GO:0003723) | rRNA binding (GO:0019843) | metal ion binding (GO:0046872) | structural constituent of ribosome (GO:0003735)	translation (GO:0006412)	intracellular (GO:0005622) | intracellular ribonucleoprotein complex (GO:0030529) | ribosome (GO:0005840)	2558.82	2416.92	2205.96	774.946	805.92	741.766	704.484	1175.24
ENSOARG00000009101	.	ENSOARG00000009101	100036761	20:7544827-7548988:+1	protein-coding	.	RNA binding (GO:0003723) | nucleic acid binding (GO:0003676) | structural constituent of ribosome (GO:0003735)	translation (GO:0006412)	intracellular (GO:0005622) | intracellular ribonucleoprotein complex (GO:0030529) | ribosome (GO:0005840)	2503.6	2404.49	2365.44	980.812	951.98	738.882	846.878	1240.44
PLAC9	PLAC9L	ENSOARG00000009984	.	25:35043612-35045484:-1	protein-coding	placenta specific 9	protein binding (GO:0005515)	unknown	unknown	2403.58	1929.35	2496.34	181.556	166.148	203.175	101.797	97.951
TPM3	CAPM1 | CFTD | HEL-189 | HEL-S-82p | NEM1 | OK/SW-cl.5 | TM-5 | TM3 | TM30 | TM30nm | TM5 | TMnm | TPMsk3 | TRK | Tm5NM | Tpm-5 | Tpm5 | Trop-5 | aTROP | cb674 | fa17b11 | fb83b01 | fk41e01 | gamma-TM | hTM30nm | hTMnm | hm:zeh0298 | hscp30 | tm3 | wu:fa17b11 | wu:fb83b01 | wu:fk41e01 | zeh0298 | zgc:77592	ENSOARG00000001845	101108973	1:103049267-103067657:-1	protein-coding	tropomyosin 3	protein binding (GO:0005515)	unknown	stress fiber (GO:0001725) | extracellular exosome (GO:0070062)	192.28	260.469	215.8	40.742	57.107	211.305	191.696	2479.75
ATP5A1	AI035633 | AL022851 | AL023067 | ATP5A | ATP5A1W | ATP5A1Z | ATP5A2 | ATP5AL2 | ATP5AP2 | ATPM | Atpa | Atpm | COXPD22 | D18Ertd206e | GB14791 | HEL-S-123m | MC5DN4 | MOM2 | Mom2 | OMR | ORM | atp5a | hATP1 | zgc:154103	ENSOARG00000002910	101111413	23:46071788-46080230:-1	protein-coding	ATP synthase, H+ transporting, mitochondrial F1 complex, alpha subunit 1, cardiac muscle	protein binding (GO:0005515) | hydrolase activity, acting on acid anhydrides, catalyzing transmembrane movement of substances (GO:0016820) | nucleotide binding (GO:0000166) | ATP binding (GO:0005524) | proton-transporting ATP synthase activity, rotational mechanism (GO:0046933) | poly(A) RNA binding (GO:0044822) | ATPase activity (GO:0016887) | proton-transporting ATPase activity, rotational mech…	negative regulation of endothelial cell proliferation (GO:0001937) | transport (GO:0006810) | ion transport (GO:0006811) | lipid metabolic process (GO:0006629) | ATP hydrolysis coupled proton transport (GO:0015991) | ATP synthesis coupled proton transport (GO:0015986) | ATP biosynthetic process (GO:0006754) | proton transport (GO:0015992) | ATP metabolic process (GO:0046034)	proton-transporting ATP synthase complex, catalytic core F(1) (GO:0045261) | plasma membrane (GO:0005886) | membrane (GO:0016020) | extracellular exosome (GO:0070062) | mitochondrial inner membrane (GO:0005743) | myelin sheath (GO:0043209) | mitochondrial proton-transporting ATP synthase complex (GO:0005753) | proton-transporting two-sector ATPase complex, catalytic domain (GO:0033178) | COP9 sig…	263.471	282.34	461.786	1638.94	1699.34	2464.92	1743.11	1753.18
COX5A	AA959768 | CG14724 | COX | COX-VA | COXA | COXA_DROME | CcOX | CoVa | Dmel\CG14724 | GB15816 | VA | Va | cova | tend	ENSOARG00000002812	.	18:32680496-32684177:+1	protein-coding	cytochrome c oxidase subunit 5A	protein binding (GO:0005515) | cytochrome-c oxidase activity (GO:0004129)	hydrogen ion transmembrane transport (GO:1902600)	myelin sheath (GO:0043209) | mitochondrion (GO:0005739) | extracellular exosome (GO:0070062) | mitochondrial inner membrane (GO:0005743)	157.831	189.199	416.462	1585.85	1488.65	2458.71	2179.25	2127.19
ENSOARG00000011605	.	ENSOARG00000011605	101120489	6:58537867-58541272:-1	protein-coding	Uncharacterized protein	rRNA binding (GO:0019843) | structural constituent of ribosome (GO:0003735)	translation (GO:0006412)	intracellular (GO:0005622) | ribosome (GO:0005840)	2435.01	2324.4	2198.46	892.237	922.161	970.834	884.789	1010.36
S100A10	42C | 42c | AA409961 | AL024248 | ANX2L | ANX2LG | CAL12 | CAL1L | CLP11 | Ca[1] | Cal1l | GP11 | P11 | anx2l | anx2lg | cal1l | calpactin | clp11 | gp11 | p10 | p11	ENSOARG00000021077	101120208	1:100863640-100867559:-1	protein-coding	S100 calcium binding protein A10	protein binding (GO:0005515) | ion channel binding (GO:0044325) | calcium ion binding (GO:0005509) | protein homodimerization activity (GO:0042803)	protein heterotetramerization (GO:0051290) | membrane budding (GO:0006900) | positive regulation of stress fiber assembly (GO:0051496) | membrane raft assembly (GO:0001765) | positive regulation of GTPase activity (GO:0043547) | establishment of protein localization to plasma membrane (GO:0090002) | positive regulation of substrate adhesion-dependent cell spreading (GO:1900026) | positive regulat…	membrane raft (GO:0045121) | extrinsic component of plasma membrane (GO:0019897) | extracellular exosome (GO:0070062)	1764.95	2430.95	1751.33	793.508	832.474	210.245	176.267	355.618
MYL1	AI325107 | MLC | MLC-1 | MLC-3 | MLC1F | MLC1f | MLC1f/3f | MLC3-f | MLC3F | MLC3f | MLCf | MYL1b | Mcl3 | Mlc1 | Mlc3 | Mylf | XMLC1f | XMLC3f | fj53a11 | mlc1f | mlc3f | wu:fj53a11 | zgc:65785 | zgc:77231	ENSOARG00000019190	101101869	2:210934024-210957923:-1	protein-coding	myosin light chain 1	calcium ion binding (GO:0005509)	muscle contraction (GO:0006936)	myofibril (GO:0030016)	0.184	0.167	0.118	0.017	0.167	0.046	0.287	2424.4
ENSOARG00000019935	.	ENSOARG00000019935	101121859	14:62565220-62565387:+1	protein-coding	Uncharacterized protein	structural constituent of ribosome (GO:0003735)	translation (GO:0006412)	intracellular (GO:0005622) | ribosome (GO:0005840)	2377.67	2194.38	1888.3	855.056	844.666	1137.17	694.121	1598.73
GNG11	0610037B21Rik | GNGT11	ENSOARG00000001101	100192421	4:11124376-11128973:+1	protein-coding	guanine nucleotide-binding protein G(I)/G(S)/G(O) subunit gamma-11	signal transducer activity (GO:0004871)	G-protein coupled receptor signaling pathway (GO:0007186) | signal transduction (GO:0007165)	heterotrimeric G-protein complex (GO:0005834) | membrane (GO:0016020) | plasma membrane (GO:0005886)	2009.67	2273.55	2366.4	507.654	698.996	390.844	422.414	265.262
RPL22	2700038K18Rik | AKKNA01_0074 | AMQ82_0060 | AchyCp081 | AdReCp012 | AktrCp062 | AmbrCp081 | AmmaCp081 | AnodCp081 | AsterspCp061 | AvhoCp081 | AvsaCp081 | BaarC_p059 | BabaC_p059 | Bocu_g61 | BosaCp062 | BosaCp096 | Br_inPt0821 | BrmaCp081 | BrvuCp063 | BubaC_p060 | CG7434 | COESC_p061 | Cegl_g61 | ChliC_p059 | CqCP_p022 | DDBDRAFT_0187786 | DDBDRAFT_0230146 | DDB_0187786 | DDB_0230146 | DEOF_Cp0…	ENSOARG00000013041	.	12:45246240-45251689:+1	protein-coding	ribosomal protein L22	protein binding (GO:0005515) | heparin binding (GO:0008201) | poly(A) RNA binding (GO:0044822) | structural constituent of ribosome (GO:0003735)	alpha-beta T cell differentiation (GO:0046632) | translation (GO:0006412)	cytosolic large ribosomal subunit (GO:0022625) | intracellular (GO:0005622) | nucleus (GO:0005634) | intracellular ribonucleoprotein complex (GO:0030529) | focal adhesion (GO:0005925) | cytoplasm (GO:0005737) | ribosome (GO:0005840) | extracellular exosome (GO:0070062)	2361.69	2253.03	2099.09	843.112	825.766	797.066	768.478	1133.15
UQCRB	2210415M14Rik | DDBDRAFT_0218791 | DDBDRAFT_0267110 | DDB_0218791 | DDB_0267110 | MC3DN3 | QCR7 | QP-C | QPC | UQBC | UQBP | UQCR6 | UQPC | Uqcrbl | im:6900881 | zgc:109893	ENSOARG00000005495	.	9:80589147-80590955:+1	protein-coding	ubiquinol-cytochrome c reductase binding protein	protein binding (GO:0005515)	mitochondrial electron transport, ubiquinol to cytochrome c (GO:0006122)	mitochondrial respiratory chain complex III (GO:0005750)	257.165	291.827	510.175	1681.22	1712.08	1856.33	2351.91	1703.98
FHL1	DKFZP468L0125 | FHL-1 | FHL1A | FHL1B | FHL1C | FLH1A | KYOT | KyoT | RAM14-1 | RBMX1A | RBMX1B | SLIM | SLIM-1 | SLIM1 | SLIMMER | SPAC8C9.01 | SPP42 | XMPMA	ENSOARG00000011424	100307044	X:93880470-93883714:-1	protein-coding	four and a half LIM domains 1	protein binding (GO:0005515) | ion channel binding (GO:0044325) | metal ion binding (GO:0046872) | zinc ion binding (GO:0008270)	negative regulation of cell growth (GO:0030308) | positive regulation of potassium ion transport (GO:0043268) | regulation of potassium ion transmembrane transporter activity (GO:1901016) | regulation of membrane depolarization (GO:0003254) | negative regulation of G1/S transition of mitotic cell cycle (GO:2000134) | negative regulation of G2/M transition of mitotic cell cycle (GO:0010972)	nucleus (GO:0005634) | focal adhesion (GO:0005925) | cytoplasm (GO:0005737) | plasma membrane (GO:0005886)	863.758	810.616	853.469	265.933	259.871	80.254	132.201	2338.12
ENSOARG00000007328	.	ENSOARG00000007328	101102145	5:59281058-59284719:-1	protein-coding	.	structural constituent of ribosome (GO:0003735)	translation (GO:0006412)	intracellular ribonucleoprotein complex (GO:0030529) | ribosome (GO:0005840)	2331.93	2157.2	2148.57	897.997	877.28	599.997	782.266	824.83
ENSOARG00000017111	.	ENSOARG00000017111	101121371	15:39762740-39763018:-1	protein-coding	Uncharacterized protein	structural constituent of ribosome (GO:0003735)	translation (GO:0006412)	intracellular (GO:0005622) | ribosome (GO:0005840)	2329.91	2174.87	2097.84	1017.76	949.077	1480.42	1012.42	2018.63
GPX3	AA960521 | ATGPX3 | EGPx | GPx | GPx-3 | GPx-P | GSHPx-3 | GSHPx-P | Gpxp | T1O24.9 | glutathione peroxidase 3 | gpx-p | gshpx-3 | gshpx-p	ENSOARG00000007929	.	5:59813035-59815552:+1	protein-coding	glutathione peroxidase 3	peroxidase activity (GO:0004601) | protein binding (GO:0005515) | glutathione peroxidase activity (GO:0004602) | selenium binding (GO:0008430) | oxidoreductase activity (GO:0016491)	hydrogen peroxide catabolic process (GO:0042744) | protein homotetramerization (GO:0051289) | oxidation-reduction process (GO:0055114) | response to oxidative stress (GO:0006979)	extracellular space (GO:0005615) | extracellular exosome (GO:0070062)	2326.82	1507.41	832.405	1140.49	916.923	328.331	452.231	134.509
FAU	Asr1 | BcDNA:HL07933 | CG45077 | CG6544 | Dmel\CG45077 | Dmel_CG6544 | ECK2907 | FAU1 | Fau | Fub1 | Fubi | JW2879 | MNSFbeta | RPS30 | S30 | UBIM | asr1 | rps30 | ygfA	ENSOARG00000012691	101106472	21:42643882-42645089:-1	protein-coding	Finkel-Biskis-Reilly murine sarcoma virus (FBR-MuSV) ubiquitously expressed	protein binding (GO:0005515) | poly(A) RNA binding (GO:0044822) | structural constituent of ribosome (GO:0003735)	translation (GO:0006412)	intracellular (GO:0005622) | ribosome (GO:0005840)	2301.03	2171.09	2211.03	960.722	919.705	987.283	903.043	1275.33
COX4I1	AL024441 | COX | COX IV-1 | COX4 | COX4-1 | COXIV | COXIV-1 | Cox4 | Cox4a | GB20012 | IV-1 | cox4 | coxiv | mg:bb02d03 | zgc:110058	ENSOARG00000011503	101105179	14:11250064-11255630:+1	protein-coding	cytochrome c oxidase subunit 4I1	protein binding (GO:0005515) | cytochrome-c oxidase activity (GO:0004129)	hydrogen ion transmembrane transport (GO:1902600)	nucleus (GO:0005634) | mitochondrial membrane (GO:0031966) | membrane (GO:0016020) | mitochondrion (GO:0005739) | extracellular exosome (GO:0070062) | mitochondrial inner membrane (GO:0005743)	512.624	517.286	807.496	1809.66	1692.03	2225.37	2298.89	1858.99
UBB	AL033289 | Chub1 | HEL-S-50 | Rps27a | UBC | UBIQ | Uba52 | Ubb2 | Ubc | Ubi-p63E | Ubiquitin | im:6892314 | rps27a | si:ch211-202a12.3 | uba52 | ubc | ubd | zUBC | zgc:172187	ENSOARG00000004399	.	11:32806436-32807122:-1	protein-coding	ubiquitin B	protein binding (GO:0005515)	neuron projection morphogenesis (GO:0048812) | positive regulation of protein monoubiquitination (GO:1902527) | positive regulation of protein ubiquitination (GO:0031398) | mitochondrion transport along microtubule (GO:0047497) | regulation of proteasomal protein catabolic process (GO:0061136) | regulation of mitochondrial membrane potential (GO:0051881) | regulation of neuron death (GO:1901214) …	nucleus (GO:0005634) | extracellular space (GO:0005615) | neuron projection (GO:0043005) | cytoplasm (GO:0005737) | mitochondrion (GO:0005739) | extracellular exosome (GO:0070062) | neuronal cell body (GO:0043025)	2223.13	2298.16	2141.26	1379.84	1332.93	1250.09	1241.84	1933.55
ENSOARG00000000822	.	ENSOARG00000000822	101122112	7:39748861-39749181:-1	protein-coding	.	structural constituent of ribosome (GO:0003735)	translation (GO:0006412)	intracellular (GO:0005622) | intracellular ribonucleoprotein complex (GO:0030529) | ribosome (GO:0005840)	2208.84	1942.48	1791.57	680.899	653.114	562.933	570.601	511.357
BGN	BG | BSPG1 | DSPG1 | PG-S1 | PGI | SLRR1A | dspg1 | pg-s1 | slrr1a | xbgn	ENSOARG00000007656	443011	X:77881463-77894344:-1	protein-coding	biglycan	glycosaminoglycan binding (GO:0005539) | protein binding (GO:0005515) | extracellular matrix binding (GO:0050840)	peptide cross-linking via chondroitin 4-sulfate glycosaminoglycan (GO:0019800)	intracellular (GO:0005622) | transport vesicle (GO:0030133) | sarcolemma (GO:0042383) | proteinaceous extracellular matrix (GO:0005578) | extracellular matrix (GO:0031012) | cell surface (GO:0009986) | extracellular exosome (GO:0070062)	2191.05	1612.86	1316.93	153.92	163.932	90.826	51.497	56.876
TNNI2	AMCD2B | DA2B | FSSV | SYT8 | TNI | TnI | TnI-F4 | amcd2b | da2b | fsTnI | fssv | fstni	ENSOARG00000003852	101121135	21:48802868-48805457:-1	protein-coding	troponin I2, fast skeletal type	actin binding (GO:0003779) | protein binding (GO:0005515) | troponin T binding (GO:0031014)	skeletal muscle contraction (GO:0003009) | positive regulation of transcription, DNA-templated (GO:0045893)	nucleus (GO:0005634) | troponin complex (GO:0005861)	3.218	3.403	3.87	2.083	4.019	0.821	3.08	2171.08
ATP5J	ATP5 | ATP5A | ATPM | CF6 | F6 | wu:fa66e04 | zgc:77541	ENSOARG00000015187	101113030	1:128879497-128883134:+1	protein-coding	ATP synthase, H+ transporting, mitochondrial Fo complex subunit F6	ATPase activity (GO:0016887) | hydrogen ion transmembrane transporter activity (GO:0015078)	substantia nigra development (GO:0021762) | ATP synthesis coupled proton transport (GO:0015986)	mitochondrial proton-transporting ATP synthase complex (GO:0005753) | mitochondrion (GO:0005739) | mitochondrial inner membrane (GO:0005743) | mitochondrial proton-transporting ATP synthase complex, coupling factor F(o) (GO:0000276)	435.293	517.981	634.058	1648.93	1767.27	2170.75	2060.18	1507.67
ATP5G3	6030447M23 | AT5G3 | P3 | atp5g1 | cg1746	ENSOARG00000000170	101108285	2:133814093-133816722:+1	protein-coding	ATP synthase, H+ transporting, mitochondrial Fo complex subunit C3 (subunit 9)	hydrogen ion transmembrane transporter activity (GO:0015078)	ATP synthesis coupled proton transport (GO:0015986) | transport (GO:0006810) | ion transport (GO:0006811) | proton transport (GO:0015992) | ATP hydrolysis coupled proton transport (GO:0015991)	integral component of membrane (GO:0016021) | membrane (GO:0016020) | proton-transporting two-sector ATPase complex, proton-transporting domain (GO:0033177) | mitochondrion (GO:0005739) | proton-transporting ATP synthase complex, coupling factor F(o) (GO:0045263)	369.991	393.632	590.341	1736.85	1721.98	2169.28	2012.57	1660.21
CSRP3	CLP | CMD1M | CMH12 | CRP3 | LMO4 | MLP | MMLP | csrp2 | csrp3-a | csrp3b | zgc:103468	ENSOARG00000008913	101115999	21:25087067-25097260:+1	protein-coding	cysteine and glycine rich protein 3	actinin binding (GO:0042805) | protein binding (GO:0005515) | telethonin binding (GO:0031433) | metal ion binding (GO:0046872) | structural constituent of muscle (GO:0008307) | zinc ion binding (GO:0008270)	detection of muscle stretch (GO:0035995) | protein localization to organelle (GO:0033365) | cellular calcium ion homeostasis (GO:0006874) | cardiac muscle hypertrophy (GO:0003300) | regulation of the force of heart contraction (GO:0002026) | positive regulation of transcription from RNA polymerase II promoter (GO:0045944) | cardiac muscle contraction (GO:0060048) | cardiac muscle tissue developme…	Z disc (GO:0030018)	2.948	2.018	323.648	2135.02	1182.17	760.131	944.573	853.487
NR4A1	GFRP1 | Gfrp | HMR | Hbr-1 | Hbr1 | Hmr | N10 | NAK-1 | NGFI-B | NGFIB | NP10 | NUR77 | Ngfi-b | Nur77 | TIS1 | TR3 | gfrp1 | hmr | n10 | nak-1 | ngf1b | ngfib | np10 | nr4a1-A | nr4a2 | nur77 | tr3 | zgc:92434	ENSOARG00000017214	.	3:134111451-134116506:-1	protein-coding	nuclear receptor subfamily 4 group A member 1	transcriptional activator activity, RNA polymerase II core promoter proximal region sequence-specific binding (GO:0001077) | protein binding (GO:0005515) | steroid hormone receptor activity (GO:0003707) | sequence-specific DNA binding (GO:0043565) | protein homodimerization activity (GO:0042803) | metal ion binding (GO:0046872) | DNA binding (GO:0003677) | RNA polymerase II transcription factor a…	fat cell differentiation (GO:0045444) | steroid hormone mediated signaling pathway (GO:0043401) | skeletal muscle cell differentiation (GO:0035914) | positive regulation of apoptotic process (GO:0043065) | negative regulation of cysteine-type endopeptidase activity involved in apoptotic process (GO:0043154) | apoptotic process (GO:0006915) | regulation of transcription, DNA-templated (GO:0006355)…	nucleus (GO:0005634) | transcription factor complex (GO:0005667)	1428.47	2082.76	1802.12	149.744	173.363	99.057	29.287	274.804
RPS17	BcDNA:RE44119 | CG3922 | CS17 | D9 | DBA4 | DDBDRAFT_0188745 | DDBDRAFT_0191513 | DDB_0188745 | DDB_0191513 | Dmel\CG3922 | F19K16.19 | F19K16_19 | GB10913 | Gi1 | LEIZ116 | M | M(3)67 | M(3)67C | M(3)RpS17 | M(3)S33 | M(3)i | M(3)i(55) | M(3)i[55] | M(3)q | M(3L)i | M(3L)i[55] | MOGBL116 | Minute | PLASTID RIBOSOMAL SMALL SUBUNIT PROTEIN 17 | PRPS17 | RPS17 | RPS17L | RPS17L1 | RPS17L2 | RS17 | …	ENSOARG00000013571	101109830	18:21944717-21947821:-1	protein-coding	40S ribosomal protein S17	structural constituent of ribosome (GO:0003735)	translation (GO:0006412)	intracellular (GO:0005622) | ribosome (GO:0005840)	2073.24	2041.14	1897.06	864.077	844.625	822.953	783.032	1341.88
ENSOARG00000016963	.	ENSOARG00000016963	.	24:1506251-1508642:-1	protein-coding	Uncharacterized protein	RNA binding (GO:0003723) | structural constituent of ribosome (GO:0003735)	translation (GO:0006412)	small ribosomal subunit (GO:0015935) | intracellular ribonucleoprotein complex (GO:0030529) | ribosome (GO:0005840)	1602.37	1640.82	1581	1340.47	1252.91	1832.77	1567.66	2066.47
RPL14 (assigned to ENSOARG00000007439)	.	ENSOARG00000007439	.	4:20548800-20549483:+1	protein-coding	60S ribosomal protein L14	unknown	unknown	unknown	2032.28	1885.28	1859.54	756.553	735.144	853.583	706.336	790.45
CD9	BTCC-1 | DRAP-27 | MIC3 | MRP-1 | Mamu-MIC1 | TSPAN-29 | TSPAN29 | Tspan29	ENSOARG00000008605	100141299	3:208069062-208082480:-1	protein-coding	CD9 antigen	protein binding (GO:0005515)	paranodal junction assembly (GO:0030913) | receptor internalization (GO:0031623) | negative regulation of cell proliferation (GO:0008285) | cell adhesion (GO:0007155) | movement of cell or subcellular component (GO:0006928) | cellular response to low-density lipoprotein particle stimulus (GO:0071404) | fusion of sperm to egg plasma membrane (GO:0007342)	integral component of membrane (GO:0016021) | external side of plasma membrane (GO:0009897) | extracellular space (GO:0005615) | focal adhesion (GO:0005925) | extracellular vesicle (GO:1903561) | membrane (GO:0016020) | extracellular exosome (GO:0070062)	1110.56	2014.38	1136.09	148.21	116.036	111.199	101.234	68.817
ENSOARG00000017679	.	ENSOARG00000017679	.	3:31523808-31524626:+1	protein-coding	Ferritin	metal ion binding (GO:0046872) | ferric iron binding (GO:0008199)	iron ion transport (GO:0006826) | cellular iron ion homeostasis (GO:0006879)	cell (GO:0005623)	1733.44	1768.2	2007.35	775.698	850.49	528.818	754.626	846.662
MYL12A	2900073G15Rik | AI838292 | C80200 | DTNB | G1 | HEL-S-24 | MLC-2 | MLC-2B | MLCB | MRCL3 | MRLC2 | MRLC3 | MYL12B | MYL2B | MYL9 | RGD1309537 | Rlc-a	ENSOARG00000010362	100270714	23:37747768-37751509:+1	protein-coding	myosin light chain 12A	glutamate receptor binding (GO:0035254) | protein binding (GO:0005515) | calcium ion binding (GO:0005509)	regulation of cell shape (GO:0008360) | protein targeting to plasma membrane (GO:0072661)	myosin II complex (GO:0016460) | stress fiber (GO:0001725) | Z disc (GO:0030018)	1156.96	1207.8	1050.19	728.679	798.339	906.363	643.227	1984.78
ENSOARG00000018519	.	ENSOARG00000018519	101112181	1:164474247-164479484:-1	protein-coding	Uncharacterized protein	unknown	unknown	unknown	1984.56	1908.5	1918.15	860.526	855.767	870.776	882.351	1504.07
ATP5L (assigned to ENSOARG00000016841)	.	ENSOARG00000016841	101123491	3:135472970-135473278:+1	protein-coding	ATP synthase, H+ transporting, mitochondrial Fo complex subunit G	hydrogen ion transmembrane transporter activity (GO:0015078)	ATP synthesis coupled proton transport (GO:0015986)	mitochondrial proton-transporting ATP synthase complex, coupling factor F(o) (GO:0000276)	672.866	692.927	817.833	1525.89	1522.26	1771.34	1976.2	1885.7
ENSOARG00000005681	.	ENSOARG00000005681	101106854	9:49443212-49445803:-1	protein-coding	.	unknown	unknown	intracellular ribonucleoprotein complex (GO:0030529) | ribosome (GO:0005840)	1974.63	1897.99	1710.37	630.327	645.891	717.615	559.01	978.326
COL1A2	AA960264 | AI325291 | COL1A1 | COLA | Col1a-2 | Cola-2 | Cola2 | OI4 | alpha2(I) | hm:zehn2357 | oi4 | oim | wu:fa98d05 | wu:fa99g10 | wu:fb04c08 | wu:fb11d06 | zehn2357	ENSOARG00000001508	443512	4:11656770-11692712:+1	protein-coding	collagen type I alpha 2 chain	identical protein binding (GO:0042802) | protein binding (GO:0005515) | protein binding, bridging (GO:0030674) | platelet-derived growth factor binding (GO:0048407) | extracellular matrix structural constituent (GO:0005201) | SMAD binding (GO:0046332)	protein heterotrimerization (GO:0070208) | Rho protein signal transduction (GO:0007266) | transforming growth factor beta receptor signaling pathway (GO:0007179) | blood vessel development (GO:0001568) | skeletal system development (GO:0001501) | collagen fibril organization (GO:0030199) | cellular response to amino acid stimulus (GO:0071230) | skin morphogenesis (GO:0043589) | regulation of bloo…	extracellular space (GO:0005615) | extracellular matrix (GO:0031012) | collagen trimer (GO:0005581) | collagen type I trimer (GO:0005584) | extracellular exosome (GO:0070062)	1973.79	1484.66	1310.31	222.28	300.371	132.129	79.864	333.239
ENSOARG00000006118	.	ENSOARG00000006118	.	14:48287581-48290565:-1	protein-coding	.	structural constituent of ribosome (GO:0003735)	translation (GO:0006412)	intracellular ribonucleoprotein complex (GO:0030529) | ribosome (GO:0005840)	1948.43	1695.07	1755.83	692.596	654.17	556.893	587.037	763.15
UQCRQ	1100001F06Rik | 1500040F11Rik | 5830407L17Rik | 9.5kDa | AA959903 | DDBDRAFT_0206048 | DDBDRAFT_0267111 | DDB_0206048 | DDB_0267111 | MC3DN4 | NV16 | QCR8 | QP-C | QPC | Qpc | UQCR7 | Uqcrb | c1502 | mg:bb03b10 | zgc:92848	ENSOARG00000013236	101121420	5:41845444-41846327:+1	protein-coding	ubiquinol-cytochrome c reductase complex III subunit VII	ubiquinol-cytochrome-c reductase activity (GO:0008121)	thalamus development (GO:0021794) | hydrogen ion transmembrane transport (GO:1902600) | cerebellar Purkinje cell layer development (GO:0021680) | subthalamus development (GO:0021539) | pons development (GO:0021548) | hypothalamus development (GO:0021854) | hippocampus development (GO:0021766) | midbrain development (GO:0030901) | pyramidal neuron development (GO:0021860)	mitochondrion (GO:0005739) | mitochondrial inner membrane (GO:0005743)	310	332.916	498.347	1407.83	1385.55	1608.2	1918.99	1372.41
ENSOARG00000008775	.	ENSOARG00000008775	.	16:31726375-31731753:+1	protein-coding	.	selenium binding (GO:0008430)	post-embryonic development (GO:0009791) | growth (GO:0040007) | locomotory behavior (GO:0007626) | selenium compound metabolic process (GO:0001887) | sexual reproduction (GO:0019953) | brain development (GO:0007420)	extracellular space (GO:0005615) | extracellular exosome (GO:0070062)	1916.33	1492.1	1356.11	395.239	513.756	245.29	280.799	141.923
CRIP1	CRHP | CRIP | CRP-1 | CRP1 | Crip | Crp-1 | crhp | crip | crp1 | zgc:103738	novel transcript reconstruction	.	undetermined	protein-coding	cysteine-rich protein 1 (intestinal)	unknown	unknown	unknown	1105.32	1909.68	1098.33	354.983	197.263	142.576	153.156	153.613
ENSOARG00000015714	.	ENSOARG00000015714	.	21:49020553-49020597:-1	protein-coding	Uncharacterized protein	unknown	unknown	unknown	1468.15	1170.03	1908.36	304.985	551.947	460.787	398.38	332.523
ACTG1	ACT | ACTA1 | ACTB | ACTG | AL023024 | Actg | Actl | BRWS2 | DFNA20 | DFNA26 | E51 | HEL-176 | act | actg | actg1a | beta-actin | dfna20 | dfna26	ENSOARG00000018506	443340	11:50420600-50422985:+1	protein-coding	actin gamma 1	identical protein binding (GO:0042802) | protein binding (GO:0005515) | ubiquitin protein ligase binding (GO:0031625)	retina homeostasis (GO:0001895) | platelet aggregation (GO:0070527)	blood microparticle (GO:0072562) | nucleus (GO:0005634) | extracellular space (GO:0005615) | membrane (GO:0016020) | plasma membrane (GO:0005886) | extracellular exosome (GO:0070062)	1433.82	1894.9	1368.15	327.367	464.913	310.073	253.173	274.811
ENSOARG00000011540	.	ENSOARG00000011540	443296	5:4381459-4382819:-1	protein-coding	.	protein binding (GO:0005515) | structural constituent of ribosome (GO:0003735)	translation (GO:0006412)	myelin sheath (GO:0043209) | intracellular (GO:0005622) | nucleus (GO:0005634) | intracellular ribonucleoprotein complex (GO:0030529) | cytoplasm (GO:0005737) | ribosome (GO:0005840)	1874.33	1862.55	1822.48	910.34	887.787	978.975	867.309	1572.27
ATP2A2	9530097L16Rik | ATP2 | ATP2B | D5Wsu150e | DAR | DD | SERCA2 | SERCA2A | SERCA2B | Serca2 | Serca2a | SercaII | atp2a | atp2a1 | atp2b | dar | mKIAA4195 | serca1 | serca2	ENSOARG00000016226	101104344	17:53803322-53859050:+1	protein-coding	ATPase sarcoplasmic/endoplasmic reticulum Ca2+ transporting 2	protein binding (GO:0005515) | S100 protein binding (GO:0044548) | hydrolase activity (GO:0016787) | calcium-transporting ATPase activity (GO:0005388) | protein C-terminus binding (GO:0008022) | nucleotide binding (GO:0000166) | enzyme binding (GO:0019899) | ATP binding (GO:0005524) | calcium ion binding (GO:0005509) | metal ion binding (GO:0046872)	cardiac muscle hypertrophy in response to stress (GO:0014898) | cellular calcium ion homeostasis (GO:0006874) | regulation of the force of heart contraction (GO:0002026) | ion transport (GO:0006811) | endoplasmic reticulum calcium ion homeostasis (GO:0032469) | calcium ion transport (GO:0006816) | positive regulation of endoplasmic reticulum calcium ion concentration (GO:0032470) | ER-nucleus sig…	integral component of membrane (GO:0016021) | sarcoplasmic reticulum membrane (GO:0033017) | endoplasmic reticulum membrane (GO:0005789) | ribbon synapse (GO:0097470) | membrane (GO:0016020) | endoplasmic reticulum (GO:0005783) | sarcoplasmic reticulum (GO:0016529)	33.872	41.389	200.802	1862.95	1620.81	1055.7	1233.61	846.077
ENSOARG00000010977	.	ENSOARG00000010977	101120721	1:80442394-80442645:-1	protein-coding	ribosomal protein S27	structural constituent of ribosome (GO:0003735)	translation (GO:0006412)	intracellular (GO:0005622) | ribosome (GO:0005840)	1856.01	1560.36	1410.15	604.205	600.586	919.194	527.061	978.376
RPL11	2010203J19Rik | BcDNA:LD17235 | CG7726 | DBA7 | DDBDRAFT_0205652 | DDBDRAFT_0214853 | DDB_0205652 | DDB_0214853 | DL11 | Dmel\CG7726 | EST A | GB16473 | GIG34 | L11 | LEIZ145 | MOGBL145 | RPL11 | Rp L11 | TampPt_p004 | chr2R:14957112..14957299 | l(2)k16914 | rplK | zgc:86748	ENSOARG00000007306	.	2:242082527-242085453:-1	protein-coding	ribosomal protein L11	protein binding (GO:0005515) | poly(A) RNA binding (GO:0044822) | structural constituent of ribosome (GO:0003735)	protein targeting (GO:0006605) | translation (GO:0006412) | rRNA processing (GO:0006364) | ribosomal large subunit biogenesis (GO:0042273)	cytosolic large ribosomal subunit (GO:0022625) | nucleolus (GO:0005730) | membrane (GO:0016020) | ribosome (GO:0005840) | extracellular exosome (GO:0070062) | intracellular (GO:0005622) | intracellular ribonucleoprotein complex (GO:0030529) | cytoplasm (GO:0005737)	1853.29	1831.51	1760.92	611.363	615.726	566.621	524.957	666.661
SPARC	BM-40 | BM-40 Sparc | BM-40-SPARC | BM-40/SPARC | BM40 | CG6378 | CT19876 | Dmel\CG6378 | OI17 | ON | Sparc | anon-EST:Posey291 | dSPARC | dsparc | hm:zeh0062 | sparc	ENSOARG00000009032	.	5:60405206-60427607:-1	protein-coding	secreted protein acidic and cysteine rich	protein binding (GO:0005515) | calcium ion binding (GO:0005509) | extracellular matrix binding (GO:0050840) | collagen binding (GO:0005518)	regulation of cell proliferation (GO:0042127) | regulation of cell morphogenesis (GO:0022604) | negative regulation of endothelial cell proliferation (GO:0001937) | positive regulation of endothelial cell migration (GO:0010595) | bone development (GO:0060348) | negative regulation of angiogenesis (GO:0016525) | signal transduction (GO:0007165) | cellular response to growth factor stimulus (GO:007…	platelet alpha granule (GO:0031091) | nuclear matrix (GO:0016363) | extracellular space (GO:0005615) | proteinaceous extracellular matrix (GO:0005578) | cytoplasm (GO:0005737) | cell surface (GO:0009986) | platelet alpha granule membrane (GO:0031092)	1838.43	1478.64	1264.66	444.837	601.891	384.452	256.481	430.301
HSPB1	27kDa | CMT2F | HEL-S-102 | HMN2B | HS.76067 | HSP27 | HSP28 | Hsp25 | Hsp27 | Hsp27alpha | SRP27 | cb153 | cb660 | cmt2f | hs.76067 | hsp1 | hsp25 | hsp27 | hsp28 | id:ibd2821 | sb:cb660 | zgc:103437	ENSOARG00000013748	.	24:34256246-34257717:+1	protein-coding	heat shock protein family B (small) member 1	identical protein binding (GO:0042802) | protein binding (GO:0005515) | protein kinase C inhibitor activity (GO:0008426) | poly(A) RNA binding (GO:0044822) | protein kinase binding (GO:0019901) | protein kinase C binding (GO:0005080)	positive regulation of angiogenesis (GO:0045766) | positive regulation of tumor necrosis factor biosynthetic process (GO:0042535) | platelet aggregation (GO:0070527) | negative regulation of protein kinase activity (GO:0006469) | positive regulation of endothelial cell chemotaxis by VEGF-activated vascular endothelial growth factor receptor signaling pathway (GO:0038033) | cellular response to va…	extracellular space (GO:0005615) | contractile fiber (GO:0043292) | plasma membrane (GO:0005886) | extracellular exosome (GO:0070062) | Z disc (GO:0030018) | intracellular (GO:0005622) | nucleus (GO:0005634) | focal adhesion (GO:0005925) | cytoplasm (GO:0005737)	729.146	664.313	861.624	841.967	792.812	967.243	1115.03	1835.72
PTMA	TMSA | Thym | VF0148 | tmsa	ENSOARG00000020723	.	2:232491778-232495973:+1	protein-coding	prothymosin, alpha	protein binding (GO:0005515) | histone binding (GO:0042393)	histone exchange (GO:0043486)	cytoplasm (GO:0005737) | nucleoplasm (GO:0005654) | extracellular exosome (GO:0070062)	1349.54	1835.12	1554.26	392.587	472.438	233.01	251.122	168.994
COX5B	BcDNA:RH49324 | CG11015 | COXB | COXVB | CcO Vb | CoVb | Dmel\CG11015 | GB16568 | Vb | anon-EST:Posey143 | anon-WO0118547.187	ENSOARG00000013670	101110664	3:103447213-103449202:+1	protein-coding	cytochrome c oxidase subunit 5B	protein binding (GO:0005515) | cytochrome-c oxidase activity (GO:0004129)	hydrogen ion transmembrane transport (GO:1902600)	mitochondrial envelope (GO:0005740) | mitochondrion (GO:0005739) | extracellular exosome (GO:0070062)	325.333	346.815	520.851	1475.58	1368.09	1550.26	1829.23	1265.53
RPLP0 (assigned to ENSOARG00000011805)	.	ENSOARG00000011805	100036764	17:62187055-62190676:-1	protein-coding	ribosomal protein lateral stalk subunit P0	unknown	ribosome biogenesis (GO:0042254)	intracellular (GO:0005622) | intracellular ribonucleoprotein complex (GO:0030529) | ribosome (GO:0005840)	1823.23	1811.2	1699.59	656.512	625.704	704.252	597.403	1260.07
EIF1	A121 | DDBDRAFT_0167763 | DDBDRAFT_0234173 | DDB_0167763 | DDB_0234173 | EIF-1 | EIF1A | ISO1 | SUI1 | SUI1ISO1 | Sui1-rs1 | a121 | eif-1 | eif1a | iso1 | sui1 | sui1-rs1	ENSOARG00000017410	101118968	11:41390956-41392541:+1	protein-coding	eukaryotic translation initiation factor 1	translation initiation factor activity (GO:0003743) | poly(A) RNA binding (GO:0044822)	translational initiation (GO:0006413) | dosage compensation by inactivation of X chromosome (GO:0009048) | regulation of translational initiation (GO:0006446)	nucleus (GO:0005634) | cytoplasm (GO:0005737)	1793.68	1790.47	1821.68	1097.77	1135.22	1390.62	1281.73	1646.23
POSTN	A630052E07Rik | AI747096 | OSF-2 | OSF2 | Osf2 | PDLPOSTN | PLF | PN | Periostin | Plf | TRPC4 | osf-2 | pdlpostn | periostin | postnb	ENSOARG00000010041	101103329	10:24474862-24508794:+1	protein-coding	periostin	protein binding (GO:0005515) | metal ion binding (GO:0046872) | heparin binding (GO:0008201)	extracellular matrix organization (GO:0030198) | cell adhesion (GO:0007155) | cellular response to vitamin K (GO:0071307) | tissue development (GO:0009888) | regulation of Notch signaling pathway (GO:0008593)	proteinaceous extracellular matrix (GO:0005578) | extracellular matrix (GO:0031012) | trans-Golgi network (GO:0005802)	691.252	1776.36	1536.66	14.223	11.22	332.898	151.744	8.679
SEPW1	SELW | SEPW | SelW | cb694 | fe37b06 | selW | selw1 | wu:fe37b06 | wu:fk70h03 | zgc:109781	ENSOARG00000011453	101119329	14:53728199-53730860:+1	protein-coding	selenoprotein W, 1	selenium binding (GO:0008430)	cell redox homeostasis (GO:0045454)	cell (GO:0005623)	428.381	431.93	652.6	1152.54	1126.65	1288.34	1774.79	971.232
ATPIF1	ATIF1 | ATPI | ATPIP | Atpi | IF(1) | IF1 | IF1PA | IP | If1 | atpi | atpip	ENSOARG00000003022	.	2:238013417-238015214:-1	protein-coding	ATPase inhibitory factor 1	protein binding (GO:0005515) | angiostatin binding (GO:0043532) | enzyme inhibitor activity (GO:0004857) | ATPase binding (GO:0051117) | ATPase inhibitor activity (GO:0042030)	regulation of protein targeting to mitochondrion (GO:1903214) | erythrocyte differentiation (GO:0030218) | negative regulation of endothelial cell proliferation (GO:0001937) | mitophagy in response to mitochondrial depolarization (GO:0098779) | heme biosynthetic process (GO:0006783) | negative regulation of nucleotide metabolic process (GO:0045980) | positive regulation of mitochondrial outer mem…	mitochondrial proton-transporting ATP synthase complex (GO:0005753) | cell surface (GO:0009986) | mitochondrion (GO:0005739)	331.305	327.83	504.256	1251.18	1173.06	1260.65	1742.42	1103.2
ENSOARG00000012610	.	ENSOARG00000012610	101115288	10:32843693-32845526:-1	protein-coding	Uncharacterized protein	structural constituent of ribosome (GO:0003735)	translation (GO:0006412)	intracellular (GO:0005622) | ribosome (GO:0005840)	1736.92	1687.54	1550.11	625.97	630.431	914.485	579.396	1149.3
ENSOARG00000015502	.	ENSOARG00000015502	.	5:79515550-79517316:-1	protein-coding	.	structural constituent of ribosome (GO:0003735)	translation (GO:0006412)	intracellular (GO:0005622) | small ribosomal subunit (GO:0015935) | intracellular ribonucleoprotein complex (GO:0030529) | ribosome (GO:0005840)	1736.36	1674.63	1404.57	471.484	497.453	378.816	431.165	558.555
LGALS1	AA410090 | GAL-1 | GAL1 | GBP | Gal-1 | Galaptin | Galbp | Galectin-1 | Galectin-Ia | L-14.5 | L14 | LGAS1 | Lect14 | OPG-1 | galectin | galectin-1	ENSOARG00000013956	.	3:213501954-213503025:+1	protein-coding	galectin 1	protein binding (GO:0005515) | galactoside binding (GO:0016936) | poly(A) RNA binding (GO:0044822) | carbohydrate binding (GO:0030246) | signal transducer activity (GO:0004871)	T cell costimulation (GO:0031295) | plasma cell differentiation (GO:0002317) | positive regulation of viral entry into host cell (GO:0046598) | myoblast differentiation (GO:0045445) | positive regulation of I-kappaB kinase/NF-kappaB signaling (GO:0043123)	intracellular (GO:0005622) | extracellular space (GO:0005615) | extracellular matrix (GO:0031012) | extracellular exosome (GO:0070062)	1715.18	1730.67	1516.78	319.37	307.256	126.844	224.018	419.502
ENSOARG00000020197	.	ENSOARG00000020197	101113437	9:41066742-41066915:-1	protein-coding	.	NADH dehydrogenase activity (GO:0003954)	oxidation-reduction process (GO:0055114)	mitochondrial respiratory chain complex I (GO:0005747) | mitochondrion (GO:0005739) | extracellular exosome (GO:0070062)	243.024	280.578	396.524	1132.23	1133.69	1530.34	1712.37	1018.52
ENSOARG00000008765	.	ENSOARG00000008765	101112018	20:25939960-25940307:-1	protein-coding	Uncharacterized protein	structural constituent of ribosome (GO:0003735)	translation (GO:0006412)	intracellular (GO:0005622) | ribosome (GO:0005840)	1703.39	1562.74	1573.05	633.535	613.214	589.45	556.431	964.306
ENSOARG00000010819	.	ENSOARG00000010819	101112018	24:30242995-30243342:+1	protein-coding	.	structural constituent of ribosome (GO:0003735)	translation (GO:0006412)	intracellular (GO:0005622) | ribosome (GO:0005840)	1703.39	1562.74	1573.05	633.535	613.214	589.45	556.431	964.306
ENSOARG00000002458	.	ENSOARG00000002458	.	19:12610248-12622050:+1	protein-coding	Uncharacterized protein	structural constituent of ribosome (GO:0003735)	translation (GO:0006412)	intracellular (GO:0005622) | small ribosomal subunit (GO:0015935) | intracellular ribonucleoprotein complex (GO:0030529) | cytoplasm (GO:0005737) | ribosome (GO:0005840)	1698.11	1561.01	1563.34	645.248	619.869	666.101	610.806	860.206
ENSOARG00000002058	.	ENSOARG00000002058	.	AMGL01123277.1:21-2753:-1	protein-coding	.	motor activity (GO:0003774)	metabolic process (GO:0008152)	myosin complex (GO:0016459)	0.701	1.056	57.57	1662.2	1503.76	567.802	141.115	200.601
FXYD1	0610012C17Rik | 1110006M24Rik | PLM | Plm | Pml | im:6894873 | plm | si:dkey-33i11.5	ENSOARG00000004709	101115476	14:44969591-44972469:+1	protein-coding	FXYD domain containing ion transport regulator 1	ion channel activity (GO:0005216) | sodium channel regulator activity (GO:0017080)	ion transmembrane transport (GO:0034220) | regulation of cardiac muscle cell membrane potential (GO:0086036) | positive regulation of sodium ion export from cell (GO:1903278) | ion transport (GO:0006811) | regulation of sodium ion transmembrane transporter activity (GO:2000649)	sarcolemma (GO:0042383) | membrane (GO:0016020)	879.776	607.955	880.394	1579.51	1396.86	726.974	1661.1	513.51
ENSOARG00000007383	.	ENSOARG00000007383	101109011	5:16217374-16218384:-1	protein-coding	60S ribosomal protein L36	structural constituent of ribosome (GO:0003735)	translation (GO:0006412)	intracellular (GO:0005622) | intracellular ribonucleoprotein complex (GO:0030529) | ribosome (GO:0005840)	1531.22	1477.08	1656.84	880.944	813.117	737.557	836.692	1199.95
ENSOARG00000014242	.	ENSOARG00000014242	100037665	2:87299183-87303568:-1	protein-coding	.	structural constituent of ribosome (GO:0003735)	translation (GO:0006412)	intracellular (GO:0005622) | intracellular ribonucleoprotein complex (GO:0030529) | ribosome (GO:0005840)	1650.77	1568.67	1557.77	659.541	638.719	684.443	584.453	791.224
APP	AAA | ABETA | ABPP | AD1 | APPI | Abeta | Abpp | Adap | Ag | CG17144 | CG42318 | CG5620 | CR32097 | CTFgamma | CVAP | Cvap | Dmel\CG42318 | Dmel_CG17144 | Dmel_CG5620 | E030013M08Rik | PN-II | PN2 | aaa | abeta | abpp | ad1 | appi | betaApp | ctfgamma | cvap | pn2	ENSOARG00000015056	101111593	1:128412485-128723883:+1	protein-coding	amyloid beta precursor protein	protein binding (GO:0005515) | PTB domain binding (GO:0051425) | receptor binding (GO:0005102) | enzyme binding (GO:0019899) | identical protein binding (GO:0042802) | transition metal ion binding (GO:0046914) | DNA binding (GO:0003677) | heparin binding (GO:0008201) | serine-type endopeptidase inhibitor activity (GO:0004867)	negative regulation of neuron differentiation (GO:0045665) | regulation of multicellular organism growth (GO:0040014) | neuron remodeling (GO:0016322) | cellular copper ion homeostasis (GO:0006878) | regulation of protein binding (GO:0043393) | axo-dendritic transport (GO:0008088) | axon midline choice point recognition (GO:0016199) | neuron apoptotic process (GO:0051402) | amyloid fibril formati…	nuclear envelope lumen (GO:0005641) | extracellular space (GO:0005615) | Golgi apparatus (GO:0005794) | cell surface (GO:0009986) | dendritic spine (GO:0043197) | plasma membrane (GO:0005886) | extracellular exosome (GO:0070062) | intracellular membrane-bounded organelle (GO:0043231) | endosome (GO:0005768) | synapse (GO:0045202) | cytoplasmic vesicle (GO:0031410) | cytoplasm (GO:0005737) | membr…	934.8	1470.53	1649.07	295.691	338.943	294.606	193.631	80.054
ENSOARG00000004976	.	ENSOARG00000004976	105601845	X:77229599-77232358:-1	protein-coding	60S ribosomal protein L10	structural constituent of ribosome (GO:0003735)	translation (GO:0006412)	intracellular (GO:0005622) | intracellular ribonucleoprotein complex (GO:0030529) | ribosome (GO:0005840)	1619.62	1466.69	1409.43	505.204	466.853	399.882	394.076	484.629
COL3A1	AW550625 | Col3a-1 | EDS4A | Tsk-2 | Tsk2 | collagen	ENSOARG00000016476	100101231	2:119229422-119270385:-1	protein-coding	collagen type III alpha 1 chain	protein binding (GO:0005515) | integrin binding (GO:0005178) | platelet-derived growth factor binding (GO:0048407) | extracellular matrix structural constituent (GO:0005201) | SMAD binding (GO:0046332)	peptide cross-linking (GO:0018149) | cerebral cortex development (GO:0021987) | skin development (GO:0043588) | integrin-mediated signaling pathway (GO:0007229) | aorta smooth muscle tissue morphogenesis (GO:0060414) | wound healing (GO:0042060) | negative regulation of immune response (GO:0050777) | positive regulation of Rho protein signal transduction (GO:0035025) | cell-matrix adhesion (GO:00…	extracellular space (GO:0005615) | proteinaceous extracellular matrix (GO:0005578) | extracellular matrix (GO:0031012) | collagen trimer (GO:0005581) | collagen type III trimer (GO:0005586)	1600.41	1236.47	1359.36	263.076	349.934	219.064	124.53	340.215
ENSOARG00000015719	.	ENSOARG00000015719	.	21:49302735-49302839:+1	protein-coding	.	DNA-directed RNA polymerase activity (GO:0003899) | protein binding (GO:0005515) | DNA binding (GO:0003677)	transcription, DNA-templated (GO:0006351) | transcription from RNA polymerase II promoter (GO:0006366)	DNA-directed RNA polymerase II, core complex (GO:0005665) | nucleus (GO:0005634)	1086.05	1213.41	1153.93	1284.07	1166.59	1450.13	1502.29	1594.59
MYL6	ESMLC | LC17 | LC17-GI | LC17-NM | LC17A | LC17B | MLC-3 | MLC1SM | MLC3NM | MLC3SM | MYL6B | Myln | zgc:103624	ENSOARG00000010069	.	3:163096468-163101729:-1	protein-coding	myosin light chain 6	protein binding (GO:0005515) | calcium ion binding (GO:0005509) | structural constituent of muscle (GO:0008307)	unknown	unconventional myosin complex (GO:0016461) | membrane (GO:0016020) | vesicle (GO:0031982) | extracellular exosome (GO:0070062) | brush border (GO:0005903)	1033.62	992.891	816.448	466.227	472.928	221.525	300.71	1560.2
PPDPF/ENSOARG:02849 (assigned to ENSOARG00000002849)	.	ENSOARG00000002849	.	JH922943.1:1749-2349:+1	protein-coding	pancreatic progenitor cell differentiation and proliferation factor	unknown	cell differentiation (GO:0030154) | multicellular organism development (GO:0007275)	unknown	379.502	342.848	511.015	419.388	351.289	380.052	534.65	1554.1
ENSOARG00000001198	.	ENSOARG00000001198	101123186	11:27540713-27544548:-1	protein-coding	.	structural constituent of ribosome (GO:0003735)	translation (GO:0006412)	intracellular (GO:0005622) | large ribosomal subunit (GO:0015934) | ribosome (GO:0005840)	1539.81	1505.93	1414.24	478.002	503.15	405.354	391.734	526.174
RPL26	CG6846 | DBA11 | DDBDRAFT_0185662 | DDBDRAFT_0230152 | DDB_0185662 | DDB_0230152 | Dmel\CG6846 | GB13731 | L26 | RPL26 | Rp L26 | SIG-20 | hm:zehn2026 | lincRNA.S5499 | wu:fa92f05 | zgc:66190	ENSOARG00000019688	101123186	2:165042588-165043025:-1	protein-coding	ribosomal protein L26	protein binding (GO:0005515) | poly(A) RNA binding (GO:0044822) | structural constituent of ribosome (GO:0003735)	translation (GO:0006412) | rRNA processing (GO:0006364) | ribosomal large subunit biogenesis (GO:0042273)	cytosolic large ribosomal subunit (GO:0022625) | intracellular (GO:0005622) | large ribosomal subunit (GO:0015934) | membrane (GO:0016020) | ribosome (GO:0005840) | extracellular exosome (GO:0070062)	1539.81	1505.93	1414.24	478.002	503.15	405.354	391.734	526.174
ENSOARG00000017744	.	ENSOARG00000017744	.	X:61479501-61482814:-1	protein-coding	Uncharacterized protein	RNA binding (GO:0003723) | structural constituent of ribosome (GO:0003735)	translation (GO:0006412)	intracellular (GO:0005622) | ribosome (GO:0005840)	1536.03	1485.94	1378.22	477.91	495.149	518.25	353.989	469.12
RPL18A	2510019J09Rik | CG6510 | DDBDRAFT_0186729 | DDBDRAFT_0233692 | DDB_0186729 | DDB_0233692 | Dmel\CG6510 | GB12795 | L18 | L18A | L18a | RP28A | RPL18a | RpL18a | anon-EST:Posey75 | rpl-20Co | zgc:56546	ENSOARG00000014457	101112566	5:5009157-5012267:-1	protein-coding	ribosomal protein L18a	protein binding (GO:0005515) | poly(A) RNA binding (GO:0044822) | structural constituent of ribosome (GO:0003735)	translation (GO:0006412)	cytosolic large ribosomal subunit (GO:0022625) | membrane (GO:0016020) | ribosome (GO:0005840)	1529.62	1412.21	1425.72	586.521	573.398	573.555	523.993	814.789
ENSOARG00000012773	.	ENSOARG00000012773	100305130	1:119867566-119874405:+1	protein-coding	ATP synthase, H+ transporting, mitochondrial F1 complex, O subunit	proton-transporting ATP synthase activity, rotational mechanism (GO:0046933)	ATP synthesis coupled proton transport (GO:0015986)	myelin sheath (GO:0043209) | membrane (GO:0016020) | mitochondrion (GO:0005739)	313.711	316.885	441.477	1106.38	1086.64	1519.97	1354.91	995.578
RPS3	6779 | AKKNA01_0073 | AMQ82_0059 | AchyCp080 | AdReCp013 | AktrCp061 | AmbrCp080 | AmmaCp080 | AnodCp080 | AsterspCp060 | AstnaC_p058 | Atax.mt.02 | AvhoCp080 | AvsaCp080 | BaarC_p058 | BabaC_p058 | BniMp001 | Bocu_g60 | BosaCp061 | Br_inPt0815 | BrmaCp080 | BrvuCp062 | BubaC_p059 | CG6779 | COESC_p060 | Cegl_g60 | ChliC_p058 | CqCP_p023 | D7Ertd795e | DDBDRAFT_0201667 | DDBDRAFT_0219830 | DDB_02…	ENSOARG00000011523	101108684	15:52780811-52785187:+1	protein-coding	ribosomal protein S3	RNA binding (GO:0003723) | transcription factor binding (GO:0008134) | DNA-(apurinic or apyrimidinic site) lyase activity (GO:0003906) | kinase binding (GO:0019900) | SUMO binding (GO:0032183) | protein kinase binding (GO:0019901) | damaged DNA binding (GO:0003684) | protein kinase A binding (GO:0051018) | protein binding (GO:0005515) | nucleic acid binding (GO:0003676) | endodeoxyribonuclease ac…	positive regulation of apoptotic signaling pathway (GO:2001235) | positive regulation of DNA repair (GO:0045739) | positive regulation of cysteine-type endopeptidase activity involved in execution phase of apoptosis (GO:2001272) | DNA damage response, detection of DNA damage (GO:0042769) | chromosome segregation (GO:0007059) | negative regulation of DNA repair (GO:0045738) | negative regulation o…	plasma membrane (GO:0005886) | mitotic spindle (GO:0072686) | ribosome (GO:0005840) | extracellular exosome (GO:0070062) | nucleus (GO:0005634) | intracellular ribonucleoprotein complex (GO:0030529) | cytosol (GO:0005829) | cytoplasm (GO:0005737) | mitochondrial matrix (GO:0005759) | cytosolic small ribosomal subunit (GO:0022627) | polysome (GO:0005844) | ruffle membrane (GO:0032587) | nucleolus …	1512.47	1404.88	1427.64	585.533	578.796	573.962	538.448	737.594
SMPX	1010001C09Rik | Csl | DFN6 | DFNX4 | chisel | csl | zgc:91881	ENSOARG00000016068	101112026	X:19010527-19029590:-1	protein-coding	small muscle protein, X-linked	unknown	unknown	nucleus (GO:0005634) | contractile fiber (GO:0043292) | costamere (GO:0043034) | muscle tendon junction (GO:0005927) | cytoplasm (GO:0005737) | M band (GO:0031430)	3.03	0.518	185.527	929.562	995.678	633.692	1278.34	1504.61
ANKRD1	ALRP | Alrp | C-193 | CARP | CVARP | Carp | Crap | MARP | MARP1 | MCARP | bA320F15.2	ENSOARG00000015908	100820746	22:12267085-12276113:-1	protein-coding	ankyrin repeat domain 1	protein binding (GO:0005515) | R-SMAD binding (GO:0070412) | histone deacetylase binding (GO:0042826) | RNA polymerase II transcription coactivator activity (GO:0001105) | titin binding (GO:0031432) | transcription corepressor activity (GO:0003714) | RNA polymerase II transcription factor binding (GO:0001085) | DNA binding (GO:0003677) | p53 binding (GO:0002039)	positive regulation of DNA damage response, signal transduction by p53 class mediator (GO:0043517) | skeletal muscle cell differentiation (GO:0035914) | positive regulation of apoptotic process (GO:0043065) | cellular response to interleukin-1 (GO:0071347) | cellular response to lipopolysaccharide (GO:0071222) | positive regulation of protein secretion (GO:0050714) | cellular response to tumor ne…	transcription factor complex (GO:0005667) | nucleus (GO:0005634) | cytosol (GO:0005829) | cytoplasm (GO:0005737) | nucleolus (GO:0005730) | myofibril (GO:0030016) | I band (GO:0031674)	51.253	64.942	254.931	1092.95	1476.21	812.968	631.363	41.266
ITM2B	ABRI | AI256040 | BRI | BRI2 | BRICD2B | Bri | Bri2 | Bricd2b | D14Sel6 | E25B | E25BMM | E3-16 | FBD | QflA-12336 | QtsA-11432 | RDGCA | imBRI2	ENSOARG00000008230	100174988	10:18364311-18388321:+1	protein-coding	integral membrane protein 2B	ATP binding (GO:0005524) | protein binding (GO:0005515) | beta-amyloid binding (GO:0001540)	negative regulation of amyloid precursor protein biosynthetic process (GO:0042985)	extracellular space (GO:0005615) | Golgi apparatus (GO:0005794) | plasma membrane (GO:0005886) | membrane (GO:0016020) | extracellular exosome (GO:0070062) | intracellular membrane-bounded organelle (GO:0043231) | Golgi-associated vesicle membrane (GO:0030660) | integral component of organelle membrane (GO:0031301)	1464.48	1270.92	1278.28	352.129	457.136	338.85	243.116	222.064
SPARCL1	Ecm2 | MAST 9 | MAST9 | PIG33 | SC1 | SPARC | SPARCL-1 | Sc1 | hevin | mast9 | sparcl	ENSOARG00000005006	101123041	6:101989024-102039415:-1	protein-coding	SPARC like 1	protein binding (GO:0005515) | calcium ion binding (GO:0005509)	signal transduction (GO:0007165)	extracellular space (GO:0005615) | proteinaceous extracellular matrix (GO:0005578) | extracellular exosome (GO:0070062)	1413.94	1435.79	1344.97	318.453	537.6	139.046	188.058	86.838
ALDOA	ALDA | Aldo-1 | Aldo1 | GSD12 | HEL-S-87p | RNALDOG5 | aldolase	ENSOARG00000004143	443085	24:26218820-26227471:-1	protein-coding	aldolase, fructose-bisphosphate A	protein binding (GO:0005515) | fructose binding (GO:0070061) | cytoskeletal protein binding (GO:0008092) | poly(A) RNA binding (GO:0044822) | fructose-bisphosphate aldolase activity (GO:0004332) | lyase activity (GO:0016829) | catalytic activity (GO:0003824)	muscle cell cellular homeostasis (GO:0046716) | regulation of cell shape (GO:0008360) | ATP biosynthetic process (GO:0006754) | glycolytic process (GO:0006096) | fructose metabolic process (GO:0006000) | striated muscle contraction (GO:0006941) | fructose 1,6-bisphosphate metabolic process (GO:0030388)	nucleus (GO:0005634) | extracellular space (GO:0005615) | actin cytoskeleton (GO:0015629) | membrane (GO:0016020) | extracellular exosome (GO:0070062)	93.23	87.126	135.035	334.706	369.815	284.973	408.555	1415.29
RPS25/ENSOARG:12211	.	ENSOARG00000012211	101110758	15:29075802-29077550:-1	protein-coding	40S ribosomal protein S25	unknown	unknown	unknown	1389.41	1246.64	1197.93	512.984	514.836	605.271	483.51	856.302
RPS25/ENSOARG:13423	.	ENSOARG00000013423	101110758	5:47127272-47127685:+1	protein-coding	40S ribosomal protein S25	unknown	unknown	unknown	1389.41	1246.64	1197.93	512.984	514.836	605.271	483.51	856.302
ATP5J2 (assigned to ENSOARG00000018577)	.	ENSOARG00000018577	.	24:36839514-36844078:+1	protein-coding	ATP synthase, H+ transporting, mitochondrial Fo complex subunit F2	unknown	unknown	unknown	344.236	374.612	458.492	1302.61	1127.85	1112.97	1385.08	848.203
ATP5G1	AT5G1 | ATP5A | ATP5G | atp5a | atp5g | wu:fb13h01 | wu:fb14d03 | zgc:73293 | zgc:86684	ENSOARG00000006653	443410	11:37173130-37175267:-1	protein-coding	ATP synthase, H+ transporting, mitochondrial Fo complex subunit C1 (subunit 9)	lipid binding (GO:0008289) | protein binding (GO:0005515) | hydrogen ion transmembrane transporter activity (GO:0015078)	ATP synthesis coupled proton transport (GO:0015986) | transport (GO:0006810) | ion transport (GO:0006811) | proton transport (GO:0015992) | ATP hydrolysis coupled proton transport (GO:0015991)	integral component of membrane (GO:0016021) | mitochondrial membrane (GO:0031966) | membrane (GO:0016020) | mitochondrial inner membrane (GO:0005743) | mitochondrial proton-transporting ATP synthase complex (GO:0005753) | proton-transporting two-sector ATPase complex, proton-transporting domain (GO:0033177) | mitochondrion (GO:0005739) | proton-transporting ATP synthase complex, coupling factor F…	92.469	103.439	236.185	981.758	1000.67	1279.74	1371.08	884.957
ENSOARG00000020280	.	ENSOARG00000020280	101118261	3:193310974-193326566:+1	protein-coding	L-lactate dehydrogenase	oxidoreductase activity, acting on the CH-OH group of donors, NAD or NADP as acceptor (GO:0016616) | L-lactate dehydrogenase activity (GO:0004459) | oxidoreductase activity (GO:0016491) | catalytic activity (GO:0003824)	carbohydrate metabolic process (GO:0005975) | carboxylic acid metabolic process (GO:0019752) | oxidation-reduction process (GO:0055114)	cytoplasm (GO:0005737)	274.405	256.319	392.86	1018.31	1143.53	1237.04	1366.2	368.153
PTGDS	21kDa | L-PGDS | LCN2 | LCNL1 | LPGDS | Lipocalin | PDS | PGD2 | PGDS | PGDS2 | PH2DISO | Ptgs3 | lipocalin | obp	novel transcript reconstruction	.	undetermined	protein-coding	prostaglandin D2 synthase 21kDa (brain)	unknown	unknown	unknown	1359.51	822.031	982.691	205.339	320.697	72.75	75.93	10.534
ENSOARG00000016489	.	ENSOARG00000016489	101118481	1:69228056-69234901:+1	protein-coding	Uncharacterized protein	5S rRNA binding (GO:0008097) | structural constituent of ribosome (GO:0003735)	translation (GO:0006412)	intracellular (GO:0005622) | ribosome (GO:0005840)	1358.28	1182.4	1159.67	408.626	450.766	487.4	363.788	563.449
ENSOARG00000003677	.	ENSOARG00000003677	.	3:2557530-2560126:-1	protein-coding	.	unknown	ribosome biogenesis (GO:0042254)	intracellular ribonucleoprotein complex (GO:0030529)	1353.12	1317.71	1348.81	494.161	494.64	447.23	414.802	517.416
ENSOARG00000015204	.	ENSOARG00000015204	.	9:85064840-85065013:-1	processed pseudogene	.	unknown	unknown	unknown	1182.71	1346.29	1270.6	415.738	511.758	395.18	411.615	373.19
ATP5G2	1810041M08Rik | AT5G3 | ATP5A | GB16842	ENSOARG00000016393	443542	3:132715794-132719269:+1	protein-coding	ATP synthase, H+ transporting, mitochondrial Fo complex subunit C2 (subunit 9)	hydrogen ion transmembrane transporter activity (GO:0015078)	ATP synthesis coupled proton transport (GO:0015986) | transport (GO:0006810) | ion transport (GO:0006811) | proton transport (GO:0015992) | ATP hydrolysis coupled proton transport (GO:0015991)	integral component of membrane (GO:0016021) | membrane (GO:0016020) | proton-transporting two-sector ATPase complex, proton-transporting domain (GO:0033177) | mitochondrion (GO:0005739) | proton-transporting ATP synthase complex, coupling factor F(o) (GO:0045263)	419.389	449.928	575.639	873.636	817.396	1066.4	1131.67	1343.73
SLC25A3	5730556H19Rik | D1S155E | OK/SW-cl.48 | PHC | PTP | Phc | ok/sw-cl.48 | phc	ENSOARG00000012970	100217412	3:167803323-167808856:+1	protein-coding	phosphate carrier protein, mitochondrial	protein complex binding (GO:0032403)	transport (GO:0006810)	integral component of membrane (GO:0016021) | nucleolus (GO:0005730) | membrane (GO:0016020) | mitochondrial inner membrane (GO:0005743) | extracellular exosome (GO:0070062) | myelin sheath (GO:0043209) | nucleus (GO:0005634) | mitochondrion (GO:0005739)	209.226	244.619	312.934	825.312	846.249	1326.29	1043.7	1002.2
MYL3	CMH8 | MLC | MLC-lV/sb | MLC1SB | MLC1V | MLC1c/1s | MLC1s | MLC1v | MLClV | Mylc | Mylc1v | VLC1 | VLCl | cmh8 | rVMLC1 | vlc1	ENSOARG00000006996	101115408	19:52560400-52569198:+1	protein-coding	myosin light chain 3	calcium ion binding (GO:0005509) | actin monomer binding (GO:0003785)	cardiac muscle contraction (GO:0060048) | regulation of striated muscle contraction (GO:0006942) | regulation of the force of heart contraction (GO:0002026) | ventricular cardiac muscle tissue morphogenesis (GO:0055010)	A band (GO:0031672) | I band (GO:0031674)	2.569	1.061	145.211	0.96	0.91	544.974	1316.46	58.161
COL1A1	COLIA1 | Col1a-1 | Cola-1 | Cola1 | EDSC | Mov-13 | Mov13 | OI1 | OI2 | OI3 | OI4	ENSOARG00000004871	443483	11:35993829-36010034:+1	protein-coding	collagen type I alpha 1	identical protein binding (GO:0042802) | protein binding (GO:0005515) | platelet-derived growth factor binding (GO:0048407) | extracellular matrix structural constituent (GO:0005201)	osteoblast differentiation (GO:0001649) | protein heterotrimerization (GO:0070208) | visual perception (GO:0007601) | skin development (GO:0043588) | positive regulation of canonical Wnt signaling pathway (GO:0090263) | sensory perception of sound (GO:0007605) | cellular response to mechanical stimulus (GO:0071260) | protein transport (GO:0015031) | embryonic skeletal system development (GO:00487…	extracellular space (GO:0005615) | proteinaceous extracellular matrix (GO:0005578) | extracellular matrix (GO:0031012) | cytoplasm (GO:0005737) | collagen trimer (GO:0005581) | collagen type I trimer (GO:0005584)	1291.43	1049.66	1017.74	167.974	222.813	109.281	65.849	224.062
RNASE4	ANG | C730049F20Rik | RAB1 | RNS4 | Rab1	ENSOARG00000012938	101114275	7:23574214-23574657:-1	protein-coding	ribonuclease A family member 4	nucleic acid binding (GO:0003676) | endonuclease activity (GO:0004519) | hydrolase activity (GO:0016787) | nuclease activity (GO:0004518)	metabolic process (GO:0008152) | nucleic acid phosphodiester bond hydrolysis (GO:0090305)	extracellular region (GO:0005576) | extracellular exosome (GO:0070062)	1278.94	1067.78	1253.65	168.442	199.792	33.682	60.351	32.705
ENSOARG00000025169	.	ENSOARG00000025169	101107954	4:70703241-70703668:+1	protein-coding	Cytochrome c	heme binding (GO:0020037) | metal ion binding (GO:0046872) | electron carrier activity (GO:0009055)	apoptotic process (GO:0006915) | oxidation-reduction process (GO:0055114)	mitochondrial intermembrane space (GO:0005758) | respiratory chain (GO:0070469) | mitochondrion (GO:0005739)	129.171	167.889	243.172	1240.28	1273.67	1208.93	1249.84	1152.7
DPT	143443_at | 1810032B19Rik | 5033416F05Rik | CG12763 | DIM 27 | DIPT | DPT | Dep | Dip | Dipt | DiptA | Dit | Dmel\CG12763 | DptA | EQ-1 | Eq1 | TRAMP | dip | dipt | dpt | si:dkey-98p3.2 | zgc:136613	ENSOARG00000009230	101122371	12:34444488-34479754:-1	protein-coding	dermatopontin	unknown	negative regulation of cell proliferation (GO:0008285) | collagen fibril organization (GO:0030199)	extracellular space (GO:0005615) | extracellular matrix (GO:0031012) | extracellular exosome (GO:0070062)	1271.45	758.248	613.989	361.804	444.831	224.458	177.401	93.116
ENSOARG00000014104	.	ENSOARG00000014104	101114033	19:40014389-40014949:-1	protein-coding	Uncharacterized protein	structural constituent of ribosome (GO:0003735)	translation (GO:0006412)	intracellular (GO:0005622) | large ribosomal subunit (GO:0015934) | intracellular ribonucleoprotein complex (GO:0030529) | ribosome (GO:0005840)	1271.29	1129.52	1118.02	367.014	379.012	369.025	294.363	461.87
ENSOARG00000014665	.	ENSOARG00000014665	101114033	1:215183248-215183808:+1	protein-coding	Uncharacterized protein	structural constituent of ribosome (GO:0003735)	translation (GO:0006412)	intracellular (GO:0005622) | large ribosomal subunit (GO:0015934) | intracellular ribonucleoprotein complex (GO:0030529) | ribosome (GO:0005840)	1271.29	1129.52	1118.02	367.014	379.012	369.025	294.363	461.87
ENSOARG00000004721	.	ENSOARG00000004721	.	11:14021615-14026742:+1	protein-coding	regakine 1-like protein precursor	chemokine activity (GO:0008009) | cytokine activity (GO:0005125)	chemotaxis (GO:0006935) | cell chemotaxis (GO:0060326) | immune response (GO:0006955)	extracellular space (GO:0005615) | extracellular region (GO:0005576)	1192.66	1265.93	707.529	98.858	189.426	102.343	107.487	82.159
RPS20	4632426K06Rik | CG15693 | DDBDRAFT_0205449 | DDBDRAFT_0231060 | DDB_0205449 | DDB_0231060 | Dmel\CG15693 | Dsk4 | GB17488 | GRMZM2G067303 | LEIZ23 | MOGBL23 | PsRPS20 | RS20 | Rps20 | S20 | S22 | TampPt_p080 | URP2 | anon-EST:Posey111 | anon-EST:Posey122 | anon-EST:Posey147 | rps22 | rpsT | rs20 | wu:fb81b03 | zgc:77758	ENSOARG00000014889	100135683	9:36111034-36112627:-1	protein-coding	ribosomal protein S20	RNA binding (GO:0003723) | protein binding (GO:0005515) | poly(A) RNA binding (GO:0044822) | structural constituent of ribosome (GO:0003735)	translation (GO:0006412)	intracellular (GO:0005622) | small ribosomal subunit (GO:0015935) | cytoplasm (GO:0005737) | membrane (GO:0016020) | ribosome (GO:0005840) | extracellular exosome (GO:0070062) | cytosolic small ribosomal subunit (GO:0022627)	1264.82	1225.96	1155.17	462.312	469.927	521.456	414.241	605.271
ENSOARG00000004546	.	ENSOARG00000004546	.	1:235641706-235643016:+1	protein-coding	.	protein binding (GO:0005515)	post-embryonic development (GO:0009791) | positive regulation of organ growth (GO:0046622) | muscle organ morphogenesis (GO:0048644) | skeletal system development (GO:0001501) | endoplasmic reticulum unfolded protein response (GO:0030968) | positive regulation of translation (GO:0045727) | positive regulation of insulin secretion (GO:0032024) | multicellular organism aging (GO:0010259) | positive…	endoplasmic reticulum (GO:0005783) | cytoplasmic microtubule (GO:0005881)	1120.95	1262.59	1077.13	285.272	294.013	332.138	246.986	272.685
ENSOARG00000004920	.	ENSOARG00000004920	101115399	15:34991675-34994265:+1	protein-coding	.	structural constituent of ribosome (GO:0003735)	translation (GO:0006412)	intracellular (GO:0005622) | ribosome (GO:0005840)	1261.14	1152.84	1117.81	503.525	493.261	755.407	485.075	1059.21
PRELP	7330409J17Rik | MST161 | MSTP161 | Prolargin | SLRR2A | sc:d0375	ENSOARG00000001660	101111470	12:649402-652454:+1	protein-coding	proline and arginine rich end leucine rich repeat protein	protein binding (GO:0005515) | extracellular matrix structural constituent (GO:0005201)	cell aging (GO:0007569)	extracellular matrix (GO:0031012) | proteinaceous extracellular matrix (GO:0005578) | extracellular vesicle (GO:1903561) | extracellular exosome (GO:0070062)	1239.97	859.024	645.619	44.251	60.654	31.635	14.881	24.239
TFPI2	AV000670 | PP5 | PP5/TFPI-2 | REF1 | TFPI-2 | si:ch211-262k23.2	ENSOARG00000000918	101113838	4:11085935-11089573:-1	protein-coding	tissue factor pathway inhibitor 2	peptidase inhibitor activity (GO:0030414) | serine-type endopeptidase inhibitor activity (GO:0004867)	negative regulation of endopeptidase activity (GO:0010951) | negative regulation of peptidase activity (GO:0010466)	nucleus (GO:0005634) | extracellular region (GO:0005576)	1228.82	1140.62	946.771	176.862	270.922	104.583	75.361	59.667
MYOZ2	1110012I24Rik | C4orf5 | CMH16 | CS-1 | Fatz-2 | Myozenin-2 | Myozl2 | SYNPO2 | cs-1 | myozenin-2	ENSOARG00000016717	100526817	6:6265305-6302669:-1	protein-coding	myozenin 2	actin binding (GO:0003779) | protein binding (GO:0005515) | telethonin binding (GO:0031433)	unknown	actin cytoskeleton (GO:0015629) | Z disc (GO:0030018)	4.61	1.908	240.516	1007.79	849.59	599.317	1219.08	457.534
PPDPF/ENSOARG:10995 (assigned to ENSOARG00000010995)	.	ENSOARG00000010995	.	13:53465401-53465913:+1	protein-coding	pancreatic progenitor cell differentiation and proliferation factor	unknown	cell differentiation (GO:0030154) | multicellular organism development (GO:0007275)	unknown	244.45	206.954	312.207	300.127	214.921	319.829	381.177	1209.28
RPL3 (assigned to ENSOARG00000016495)	.	ENSOARG00000016495	101106836	3:214727161-214733292:-1	protein-coding	ribosomal protein L3	structural constituent of ribosome (GO:0003735)	translation (GO:0006412)	intracellular (GO:0005622) | intracellular ribonucleoprotein complex (GO:0030529) | ribosome (GO:0005840)	1206.83	1208.61	1134.2	267.828	301.102	208.293	162.018	150.025
TIMP3	HSMRK222 | IMP-3 | K222 | K222TA2 | SFD | TIMP-3 | Timp-3 | fgtimp-3 | timp-3 | timp3-A	ENSOARG00000018210	100217407	3:176462578-176519533:+1	protein-coding	TIMP metallopeptidase inhibitor 3	protein binding (GO:0005515) | metalloendopeptidase inhibitor activity (GO:0008191)	cellular response to organic substance (GO:0071310) | positive regulation of TRAIL-activated apoptotic signaling pathway (GO:1903984) | negative regulation of metalloendopeptidase activity (GO:1904684) | negative regulation of ERK1 and ERK2 cascade (GO:0070373) | negative regulation of endopeptidase activity (GO:0010951) | negative regulation of membrane protein ectodomain proteolysis (GO:0051045)	basement membrane (GO:0005604) | nucleus (GO:0005634) | extracellular matrix (GO:0031012) | extracellular exosome (GO:0070062) | extracellular region (GO:0005576)	1203.82	675.371	495.856	117.103	130.776	58.362	61.085	51.396
RPL29	BcDNA:RH58777 | CG10071 | DDBDRAFT_0205604 | DDBDRAFT_0230154 | DDB_0205604 | DDB_0230154 | DL43 | Dmel\CG10071 | GB11397 | GRMZM2G028216 | HIP | HUMRPL29 | L29 | LEIZ115 | MOGBL115 | RL29 | RPL29/HIP | RPL29P10 | RPL29_3_370 | RpL43 | Rpl43 | TampPt_p114 | anon-EST:Posey204 | anon-EST:Posey73 | rpmC	ENSOARG00000006456	101113539	19:48912278-48913928:+1	protein-coding	ribosomal protein L29	poly(A) RNA binding (GO:0044822) | structural constituent of ribosome (GO:0003735)	translation (GO:0006412)	cytosolic large ribosomal subunit (GO:0022625) | intracellular (GO:0005622) | membrane (GO:0016020) | ribosome (GO:0005840)	1148.22	1200.53	1168.01	476.707	478.877	434.192	430.634	612.068
RPL8	CG1263 | DDBDRAFT_0167638 | DDBDRAFT_0185202 | DDB_0167638 | DDB_0185202 | Dmel\CG1263 | GB17629 | GekBS074P | L2 | L8 | M(3)62F | M(3)LS2 | RPL8 | Rp L8 | anon-EST:Posey5 | rpL8 | rpl2 | zgc:73105 | zgc:77641	ENSOARG00000012645	101111556	9:13276130-13278418:-1	protein-coding	ribosomal protein L8	RNA binding (GO:0003723) | protein binding (GO:0005515) | poly(A) RNA binding (GO:0044822) | structural constituent of ribosome (GO:0003735)	translation (GO:0006412)	cytosolic large ribosomal subunit (GO:0022625) | nucleolus (GO:0005730) | membrane (GO:0016020) | ribosome (GO:0005840) | large ribosomal subunit (GO:0015934) | intracellular (GO:0005622) | focal adhesion (GO:0005925) | cytoplasm (GO:0005737)	1200.16	1176.33	1177.41	556.491	538.664	691.243	549.763	731.535
ENSOARG00000014113	.	ENSOARG00000014113	.	19:41134087-41134308:+1	protein-coding	Uncharacterized protein	cytochrome-c oxidase activity (GO:0004129)	hydrogen ion transmembrane transport (GO:1902600)	unknown	436.863	477.451	561.633	948.087	897.309	905.454	1197.88	688.85
ENSOARG00000015305	.	ENSOARG00000015305	.	21:23993303-23993524:-1	protein-coding	Uncharacterized protein	cytochrome-c oxidase activity (GO:0004129)	hydrogen ion transmembrane transport (GO:1902600)	unknown	436.863	477.451	561.633	948.087	897.309	905.454	1197.88	688.85
MYBPC3	CMD1MM | CMH4 | FHC | LVNC10 | MYBP-C | MYPC1 | SPI1 | cmh4 | fhc | hm:zehn0716 | im:6900815 | mybp-c | zgc:152717 | zgc:158442	ENSOARG00000006257	.	15:75411873-75428798:-1	protein-coding	myosin binding protein C, cardiac	identical protein binding (GO:0042802) | protein binding (GO:0005515) | myosin binding (GO:0017022) | structural constituent of muscle (GO:0008307) | myosin heavy chain binding (GO:0032036)	heart morphogenesis (GO:0003007) | ventricular cardiac muscle tissue morphogenesis (GO:0055010)	striated muscle myosin thick filament (GO:0005863) | A band (GO:0031672) | sarcomere (GO:0030017)	1.955	0.533	207.935	1122.73	1021.15	833.405	1193.31	0.041
ENSOARG00000010581	.	ENSOARG00000010581	.	24:2001073-2001207:+1	protein-coding	.	hydrogen ion transmembrane transporter activity (GO:0015078)	ATP hydrolysis coupled proton transport (GO:0015991)	proton-transporting two-sector ATPase complex, proton-transporting domain (GO:0033177) | proton-transporting V-type ATPase, V0 domain (GO:0033179)	959.353	1106.87	1187.49	884.554	851.068	860.997	920.216	499.95
ENSOARG00000011060	.	ENSOARG00000011060	.	5:40986460-40987643:+1	protein-coding	Uncharacterized protein	glutathione peroxidase activity (GO:0004602)	oxidation-reduction process (GO:0055114) | response to oxidative stress (GO:0006979)	unknown	236.745	254.074	348.804	840.092	790.805	1066.67	1159.23	253.982
LDHA	AGR_L_1952 | DDBDRAFT_0204015 | DDBDRAFT_0238140 | DDB_0204015 | DDB_0238140 | ECK1377 | GSD11 | HEL-S-133P | JW1375 | LDH-A | LDH-M | LDHC | LDHM | Ldh1 | Ldhm | PIG19 | QccE-13248 | QflA-14835 | VF1055 | gsd11 | hslF | hslI | htpH | l7R2 | ldh-m | ldh1 | ldhm | pig19	ENSOARG00000009602	443089	21:25632801-25641210:-1	protein-coding	lactate dehydrogenase A	oxidoreductase activity, acting on the CH-OH group of donors, NAD or NADP as acceptor (GO:0016616) | protein binding (GO:0005515) | L-lactate dehydrogenase activity (GO:0004459) | oxidoreductase activity (GO:0016491) | catalytic activity (GO:0003824)	carbohydrate metabolic process (GO:0005975) | carboxylic acid metabolic process (GO:0019752) | oxidation-reduction process (GO:0055114)	nucleus (GO:0005634) | cytoplasm (GO:0005737) | membrane (GO:0016020) | extracellular exosome (GO:0070062)	128.032	106.775	81.318	30.657	34.12	44.215	32.505	1157.27
RPL36A	CG7424 | DDBDRAFT_0216719 | DDBDRAFT_0231154 | DDB_0216719 | DDB_0231154 | Dmel\CG7424 | GB15143 | L36A | L44L | MIG6 | RPL36AL | RPL39B | RPL44 | Rpl44 | anon-EST:fe1B2 | bbr | rl44	ENSOARG00000001638	101105982	X:125613554-125616789:+1	protein-coding	Uncharacterized protein	structural constituent of ribosome (GO:0003735)	translation (GO:0006412)	intracellular (GO:0005622) | intracellular ribonucleoprotein complex (GO:0030529) | ribosome (GO:0005840)	1078.42	1149.93	1003.56	469.047	457.139	440.918	428.105	748.256
RPL18	CG8615 | CYTOPLASMIC RIBOSOMAL PROTEIN L18 | DBP | DDBDRAFT_0205924 | DDBDRAFT_0229960 | DDB_0205924 | DDB_0229960 | Dmel\CG8615 | F18C1.14 | F18C1_14 | GB11029 | L18 | LEIZ122 | MOGBL122 | RL18 | Rp L18 | RpL18e | Rpl18a | TampPt_p121 | fa98d03 | ribosomal protein L18 | rplR | wu:fa98d03 | zgc:92872	ENSOARG00000011932	101122808	14:54305627-54309280:-1	protein-coding	ribosomal protein L18	structural constituent of ribosome (GO:0003735)	translation (GO:0006412)	cytosolic large ribosomal subunit (GO:0022625) | nucleolus (GO:0005730) | membrane (GO:0016020) | ribosome (GO:0005840) | intracellular (GO:0005622) | intracellular ribonucleoprotein complex (GO:0030529) | nucleus (GO:0005634) | focal adhesion (GO:0005925) | cytoplasm (GO:0005737)	1145.65	1136.44	1096.64	481.72	456.091	471.667	442.112	564.538
MYH2	IBM3 | MHC2A | MYH2A | MYHC-2A | MYHSA2 | MYHas8 | MYPOP | MyHC-2A | MyHC-2a | MyHC-IIA | MyHC-IIa | Myh1 | Myh2a | Myhs-f | Myhs-f1 | Myhsf1 | myh13 | myh2a | myhas8 | myhc-2a | myhc-iia | myhe19 | myhsa2	ENSOARG00000012656	443471	11:29058035-29083938:-1	protein-coding	myosin, heavy chain 2, skeletal muscle, adult	ATP binding (GO:0005524) | actin binding (GO:0003779) | protein binding (GO:0005515) | motor activity (GO:0003774) | nucleotide binding (GO:0000166)	metabolic process (GO:0008152) | muscle contraction (GO:0006936) | plasma membrane repair (GO:0001778) | response to activity (GO:0014823) | actin-mediated cell contraction (GO:0070252)	protein complex (GO:0043234) | myosin complex (GO:0016459) | Golgi apparatus (GO:0005794) | actomyosin contractile ring (GO:0005826) | cell-cell junction (GO:0005911) | myofibril (GO:0030016) | A band (GO:0031672)	0.069	0.05	1.257	48.392	50.341	0.429	1.697	1144.53
ENSOARG00000011763	.	ENSOARG00000011763	541599	5:41244744-41246108:+1	protein-coding	ribosomal protein S15	RNA binding (GO:0003723) | protein binding (GO:0005515) | structural constituent of ribosome (GO:0003735)	translation (GO:0006412)	small ribosomal subunit (GO:0015935) | intracellular ribonucleoprotein complex (GO:0030529) | ribosome (GO:0005840)	1130.49	1135.54	1036.25	447.879	465.824	498.347	406.788	690.487
RPL12	CG3195 | DDBDRAFT_0187878 | DDBDRAFT_0229950 | DDB_0187878 | DDB_0229950 | Dmel\CG3195 | E430018F03 | GB19465 | L12 | LEIZ143 | MOGBL143 | NeohC_p001 | NeohC_p100 | Q9W1B9_DROME | RPL12 | Rp L12 | Rpl12 | TampPt_p006 | VT30_34 | VU20_6 | VU21_104 | VU22_53 | VU24_52 | VU81_52 | VU95_104 | VU99_50 | VU99_96 | VV00_52 | anon-EST:Posey236 | fj18a12 | rl12 | rplL | wu:fa27c04 | wu:fa91d03 | wu:fb14g0…	ENSOARG00000011320	.	14:46881856-46882431:+1	protein-coding	ribosomal protein L12	protein binding (GO:0005515) | poly(A) RNA binding (GO:0044822) | structural constituent of ribosome (GO:0003735)	translation (GO:0006412)	cytosolic large ribosomal subunit (GO:0022625) | nucleolus (GO:0005730) | membrane (GO:0016020) | ribosome (GO:0005840) | extracellular exosome (GO:0070062) | nucleus (GO:0005634) | intracellular ribonucleoprotein complex (GO:0030529) | focal adhesion (GO:0005925) | cytoplasm (GO:0005737)	1104.05	1134.7	853.995	407.256	405.84	313.524	348.503	481.123
ENSOARG00000020821	.	ENSOARG00000020821	100048993	7:46840046-46885147:+1	protein-coding	Annexin A2	calcium ion binding (GO:0005509) | cytoskeletal protein binding (GO:0008092) | phospholipase inhibitor activity (GO:0004859) | calcium-dependent phospholipid binding (GO:0005544)	negative regulation of catalytic activity (GO:0043086)	basement membrane (GO:0005604) | proteinaceous extracellular matrix (GO:0005578) | extracellular region (GO:0005576)	826.246	1117.18	748.896	136.982	175.675	95.664	77.268	108.855
ENSOARG00000011986	.	ENSOARG00000011986	101118057	20:9537073-9539148:+1	protein-coding	.	RNA binding (GO:0003723) | structural constituent of ribosome (GO:0003735)	translation (GO:0006412)	large ribosomal subunit (GO:0015934) | intracellular ribonucleoprotein complex (GO:0030529) | ribosome (GO:0005840)	1110.16	1054.72	1056.37	448.884	411.485	355.946	395.907	481.731
ENSOARG00000006571	.	ENSOARG00000006571	.	21:17310181-17310609:-1	protein-coding	Uncharacterized protein	GTPase activity (GO:0003924) | structural constituent of cytoskeleton (GO:0005200) | nucleotide binding (GO:0000166) | GTP binding (GO:0005525)	metabolic process (GO:0008152) | microtubule-based process (GO:0007017)	microtubule (GO:0005874)	891.957	1106.02	1047.43	490.276	543.11	349.249	386.216	199.586
ENO3	BBE | ENO1 | Eno-3 | GSD13 | MSE | cb883 | fj24f12 | gsd13 | mse | wu:fj24f12	ENSOARG00000005506	443086	11:26055427-26059849:-1	protein-coding	enolase 3	magnesium ion binding (GO:0000287) | phosphopyruvate hydratase activity (GO:0004634)	glycolytic process (GO:0006096)	extracellular space (GO:0005615) | cytoplasm (GO:0005737) | plasma membrane (GO:0005886) | phosphopyruvate hydratase complex (GO:0000015) | extracellular exosome (GO:0070062)	6.403	5.579	155.147	462.839	522.714	521.844	1058.03	1104.32
LUZP6	MPD6 | MTPNUT	ENSOARG00000001200	.	4:99506310-99506435:-1	protein-coding	Uncharacterized protein	unknown	unknown	unknown	957.695	1098.15	952.442	290.524	307.587	270.607	242.464	179.359
ENSOARG00000001097	.	ENSOARG00000001097	.	1:124860372-124860566:-1	protein-coding	.	unknown	unknown	unknown	1094.17	1075.01	1029.1	538.52	532.449	505.211	550.639	463.203
MDH1	B230377B03Rik | CG5362 | CT17038 | D17921 | Dmel\CG5362 | HEL-S-32 | MDH | MDH-1 | MDH-s | MDHA | MDL1 | MGC:1375 | MOR2 | Mdh | Mdh-1 | Mdh2 | MdhD | Mdhl | Mor-2 | Mor2 | cMdh | mdh-s | mdha | mor2 | sMdh	ENSOARG00000020069	101116035	3:44557106-44580716:-1	protein-coding	malate dehydrogenase 1	oxidoreductase activity, acting on the CH-OH group of donors, NAD or NADP as acceptor (GO:0016616) | protein binding (GO:0005515) | L-malate dehydrogenase activity (GO:0030060) | malate dehydrogenase activity (GO:0016615) | oxidoreductase activity (GO:0016491) | catalytic activity (GO:0003824)	carbohydrate metabolic process (GO:0005975) | xenophagy (GO:0098792) | tricarboxylic acid cycle (GO:0006099) | mitophagy in response to mitochondrial depolarization (GO:0098779) | malate metabolic process (GO:0006108) | carboxylic acid metabolic process (GO:0019752) | positive regulation of defense response to virus by host (GO:0002230) | oxidation-reduction process (GO:0055114)	myelin sheath (GO:0043209) | centrosome (GO:0005813) | extracellular space (GO:0005615) | cytoplasm (GO:0005737) | mitochondrion (GO:0005739) | extracellular exosome (GO:0070062)	146.239	138.676	241.117	735.915	798.864	1092.82	1038.21	595.199
S100A1	AI266795 | S100 | S100-alpha | S100A | S100a	ENSOARG00000000707	.	1:102635347-102639148:+1	protein-coding	S100 calcium binding protein A1	identical protein binding (GO:0042802) | protein binding (GO:0005515) | calcium ion binding (GO:0005509) | protein homodimerization activity (GO:0042803) | S100 protein binding (GO:0044548) | metal ion binding (GO:0046872) | ATPase binding (GO:0051117)	substantia nigra development (GO:0021762) | regulation of heart contraction (GO:0008016)	nucleus (GO:0005634) | sarcoplasmic reticulum (GO:0016529)	10.56	8.41	163.795	1091.83	1050.62	307.217	336.482	171.546
S100A11	EMAPI | Emap1 | HEL-S-43 | MLN70 | PCALG | S100C | S100a14 | S100c | cal | dicalcin | mln70 | p26olf | s100c | si:dkey-105n5.1	ENSOARG00000021079	101120456	1:100903646-100905119:-1	protein-coding	S100 calcium binding protein A11	protein binding (GO:0005515) | calcium ion binding (GO:0005509) | protein homodimerization activity (GO:0042803) | S100 protein binding (GO:0044548) | metal ion binding (GO:0046872) | calcium-dependent protein binding (GO:0048306)	regulation of cell proliferation (GO:0042127)	nucleus (GO:0005634) | extracellular space (GO:0005615) | cytoplasm (GO:0005737) | ruffle (GO:0001726) | extracellular exosome (GO:0070062)	952.826	1090.14	803.103	186.253	233.747	129.234	131.416	109.712
SEC61G	DDBDRAFT_0187628 | DDBDRAFT_0235195 | DDB_0187628 | DDB_0235195 | SSS1 | sec61 | sss1 | zgc:92840	ENSOARG00000011378	.	14:49457592-49457795:-1	protein-coding	Sec61 translocon gamma subunit	protein binding (GO:0005515) | P-P-bond-hydrolysis-driven protein transmembrane transporter activity (GO:0015450)	protein targeting (GO:0006605) | protein transport (GO:0015031) | intracellular protein transport (GO:0006886) | protein transmembrane transport (GO:0071806)	intracellular (GO:0005622) | membrane (GO:0016020)	1058.61	1087.96	845.771	475.091	479.717	344.884	447.226	480.559
ENSOARG00000018177	.	ENSOARG00000018177	.	17:50485203-50487474:+1	protein-coding	.	protein binding (GO:0005515)	unknown	cytoplasm (GO:0005737)	910.042	1076.85	1074.55	488.477	623.438	580.476	420.691	807.722
ACTB	ACT-5 | ACTA1 | Actx | B-actin | BRWS1 | Bact | Beta-actin | E430023M04Rik | PS1TP5BP1 | act-2 | actba | actin | beta-actin | ps1tp5bp1	ENSOARG00000003021	.	24:38675524-38677778:+1	protein-coding	actin beta	identical protein binding (GO:0042802) | protein binding (GO:0005515) | RNA polymerase II distal enhancer sequence-specific DNA binding (GO:0000980) | nitric-oxide synthase binding (GO:0050998) | nucleosomal DNA binding (GO:0031492) | kinesin binding (GO:0019894) | RNA polymerase II core promoter proximal region sequence-specific DNA binding (GO:0000978) | Tat protein binding (GO:0030957)	ATP-dependent chromatin remodeling (GO:0043044) | substantia nigra development (GO:0021762) | retina homeostasis (GO:0001895) | platelet aggregation (GO:0070527)	protein complex (GO:0043234) | cortical cytoskeleton (GO:0030863) | extracellular space (GO:0005615) | membrane (GO:0016020) | MLL5-L complex (GO:0070688) | plasma membrane (GO:0005886) | extracellular exosome (GO:0070062) | myelin sheath (GO:0043209) | blood microparticle (GO:0072562) | cytoplasmic ribonucleoprotein granule (GO:0036464) | NuA4 histone acetyltransferase complex (GO:0035267) | int…	744.694	1071.7	839.352	273.814	418.908	219.604	254.734	188.623
ENSOARG00000003492	.	ENSOARG00000003492	.	7:98883684-98887966:+1	protein-coding	.	calcium ion binding (GO:0005509)	unknown	unknown	843.075	1070.9	864.757	359.579	399.801	257.243	241.29	499.477
ENSOARG00000009555	.	ENSOARG00000009555	105601841	11:54829754-54830376:+1	protein-coding	.	DNA binding (GO:0003677) | protein heterodimerization activity (GO:0046982)	unknown	chromosome (GO:0005694) | nucleus (GO:0005634) | nucleosome (GO:0000786)	880.22	1062.41	913.951	232.953	252.011	171.3	172.028	155.641
RACK1	AL033335 | CG7111 | Dmel\CG7111 | GB-like | GB11076 | GNB2L1 | Gnb2-rs1 | Gnb2l1 | H12.3 | HLC-7 | PIG21 | RACK1 | dRack1 | i173 | p205 | rack | rack1	ENSOARG00000012019	.	X:95200485-95201341:-1	protein-coding	receptor for activated C kinase 1	protein binding (GO:0005515) | cysteine-type endopeptidase activator activity involved in apoptotic process (GO:0008656) | protein tyrosine kinase inhibitor activity (GO:0030292) | protein kinase C binding (GO:0005080) | enzyme binding (GO:0019899) | SH2 domain binding (GO:0042169) | protein homodimerization activity (GO:0042803) | poly(A) RNA binding (GO:0044822) | receptor tyrosine kinase bindi…	positive regulation of proteasomal ubiquitin-dependent protein catabolic process (GO:0032436) | negative regulation of gene expression (GO:0010629) | negative regulation of phagocytosis (GO:0050765) | positive regulation of GTPase activity (GO:0043547) | negative regulation of peptidyl-serine phosphorylation (GO:0033137) | negative regulation of hydrogen peroxide-induced neuron death (GO:1903208)…	IRE1-RACK1-PP2A complex (GO:1990630) | cell body (GO:0044297) | neuron projection (GO:0043005) | midbody (GO:0030496) | dendrite (GO:0030425) | extracellular exosome (GO:0070062) | nucleus (GO:0005634) | cytosol (GO:0005829) | cytoplasm (GO:0005737) | perinuclear region of cytoplasm (GO:0048471) | mitochondrion (GO:0005739) | neuronal cell body (GO:0043025) | phagocytic cup (GO:0001891)	1012.8	1061.69	989.843	491.236	448.235	531.933	475.317	741.917
GABARAP	ATG8A | GABARAP-a | GBRAP | MM46	ENSOARG00000011016	101118285	11:26584745-26586216:-1	protein-coding	GABA type A receptor-associated protein	protein binding (GO:0005515) | microtubule binding (GO:0008017)	autophagosome assembly (GO:0000045) | autophagy (GO:0006914) | microtubule cytoskeleton organization (GO:0000226)	smooth endoplasmic reticulum (GO:0005790) | Golgi apparatus (GO:0005794) | actin cytoskeleton (GO:0015629) | microtubule associated complex (GO:0005875) | axoneme (GO:0005930) | cytoplasm (GO:0005737) | plasma membrane (GO:0005886) | lysosome (GO:0005764) | sperm midpiece (GO:0097225)	1059.4	1050.3	1025.86	469.793	490.868	382.714	444.009	347.702
FMOD	AI131919 | AU041740 | FM | SLRR2E	ENSOARG00000001637	101111037	12:522962-529101:-1	protein-coding	fibromodulin	protein binding (GO:0005515)	collagen fibril organization (GO:0030199)	extracellular space (GO:0005615) | extracellular matrix (GO:0031012) | proteinaceous extracellular matrix (GO:0005578)	1056.88	801.361	533.176	5.769	2.636	1.94	0.655	178.798
ENSOARG00000001909	.	ENSOARG00000001909	.	1:182745303-182745410:-1	protein-coding	Uncharacterized protein	copper ion binding (GO:0005507) | copper chaperone activity (GO:0016531)	copper ion transport (GO:0006825)	mitochondrial intermembrane space (GO:0005758)	416.842	543.252	522.943	946.502	911.965	761.117	1052.09	1030.77
MUSTN1 (assigned to ENSOARG00000000606)	.	ENSOARG00000000606	101108693	19:48034454-48034918:+1	protein-coding	musculoskeletal, embryonic nuclear protein 1	unknown	unknown	unknown	528.564	659.048	510.063	206.426	219.001	25.653	161.048	1051.41
ENSOARG00000004138	.	ENSOARG00000004138	.	21:41613641-41615042:+1	protein-coding	cytochrome c oxidase subunit 8A	cytochrome-c oxidase activity (GO:0004129)	hydrogen ion transmembrane transport (GO:1902600)	mitochondrion (GO:0005739)	895.77	922.863	1042.83	801.263	752.179	574.217	771.925	321.243
ENSOARG00000002753	.	ENSOARG00000002753	101102330	14:60263227-60268704:-1	protein-coding	Uncharacterized protein	RNA binding (GO:0003723) | rRNA binding (GO:0019843) | structural constituent of ribosome (GO:0003735)	translation (GO:0006412)	intracellular (GO:0005622) | small ribosomal subunit (GO:0015935) | intracellular ribonucleoprotein complex (GO:0030529) | ribosome (GO:0005840)	1033.72	1036.87	1004.46	477.528	434.341	544.271	463.946	692.312
ENSOARG00000000311	.	ENSOARG00000000311	.	JH921894.1:28009-28273:+1	protein-coding	.	unknown	unknown	integral component of membrane (GO:0016021)	1035.16	1001.68	1033.09	315.6	346.997	273.573	207.108	220.309
ENSOARG00000010592	.	ENSOARG00000010592	101115487	20:8597217-8603003:-1	protein-coding	Uncharacterized protein	unknown	unknown	unknown	1025.06	1033.4	985.897	443.306	428.092	393.894	349.959	511.835
ENSOARG00000003744	.	ENSOARG00000003744	101102413	14:38339927-38344098:-1	protein-coding	haptoglobin	serine-type endopeptidase activity (GO:0004252)	Notch signaling pathway (GO:0007219) | proteolysis (GO:0006508)	unknown	1029.85	730.71	424.006	7.379	27.846	0.37	1.731	0.484
EEF1B2 (assigned to ENSOARG00000018622)	.	ENSOARG00000018622	101115859	2:207198404-207201274:+1	protein-coding	eukaryotic translation elongation factor 1 beta 2	translation elongation factor activity (GO:0003746)	translation (GO:0006412) | translational elongation (GO:0006414)	eukaryotic translation elongation factor 1 complex (GO:0005853)	1026.39	834.806	791.575	329.897	314.59	326.717	280.082	502.555
ENSOARG00000005549	.	ENSOARG00000005549	101106110	17:6548267-6553023:-1	protein-coding	.	structural constituent of ribosome (GO:0003735)	cell differentiation (GO:0030154) | translation (GO:0006412)	intracellular (GO:0005622) | nucleus (GO:0005634) | intracellular ribonucleoprotein complex (GO:0030529) | cytoplasm (GO:0005737) | ribosome (GO:0005840) | cytosolic small ribosomal subunit (GO:0022627)	756.284	1021.31	670.161	280.673	357.529	540.812	252.448	598.427
ATP5B	ATPMB | ATPSB | ATPsyn-beta | Atpsyn-beta | DDBDRAFT_0190669 | DDBDRAFT_0233951 | DDB_0190669 | DDB_0233951 | GB13596 | HEL-S-271 | atpmb | atpsb | fj13e04 | fj55c09 | hm:zehn0534 | im:6793121 | wu:fj13e04 | wu:fj38d01 | wu:fj55c09 | zgc:111961	ENSOARG00000008306	101106318	3:162719098-162726698:+1	protein-coding	ATP synthase, H+ transporting, mitochondrial F1 complex, beta polypeptide	protein binding (GO:0005515) | hydrolase activity, acting on acid anhydrides, catalyzing transmembrane movement of substances (GO:0016820) | nucleotide binding (GO:0000166) | ATP binding (GO:0005524) | proton-transporting ATP synthase activity, rotational mechanism (GO:0046933) | ATPase activity (GO:0016887) | proton-transporting ATPase activity, rotational mechanism (GO:0046961) | MHC class I pr…	osteoblast differentiation (GO:0001649) | transport (GO:0006810) | negative regulation of cell adhesion involved in substrate-bound cell migration (GO:0006933) | lipid metabolic process (GO:0006629) | ion transport (GO:0006811) | ATP hydrolysis coupled proton transport (GO:0015991) | ATP synthesis coupled proton transport (GO:0015986) | ATP biosynthetic process (GO:0006754) | angiogenesis (GO:000…	mitochondrial membrane (GO:0031966) | proton-transporting ATP synthase complex, catalytic core F(1) (GO:0045261) | mitochondrial nucleoid (GO:0042645) | cell surface (GO:0009986) | plasma membrane (GO:0005886) | membrane (GO:0016020) | extracellular exosome (GO:0070062) | mitochondrial inner membrane (GO:0005743) | myelin sheath (GO:0043209) | mitochondrial proton-transporting ATP synthase comple…	114.274	130.024	200.963	623.255	632.804	1018.46	733.495	773.232
RPL4 (assigned to ENSOARG00000018207)	.	ENSOARG00000018207	780462	7:13131998-13136564:-1	protein-coding	ribosomal protein L4	structural constituent of ribosome (GO:0003735)	translation (GO:0006412)	ribosome (GO:0005840)	1009.71	871.435	831.7	330.195	324.326	449.619	293.807	573.201
GSN	ADF | AGEL | SCIN | scin	ENSOARG00000005473	100579169	2:2156199-2187147:-1	protein-coding	gelsolin	actin binding (GO:0003779) | protein binding (GO:0005515) | calcium ion binding (GO:0005509)	actin nucleation (GO:0045010) | actin filament polymerization (GO:0030041) | vesicle-mediated transport (GO:0016192) | actin filament capping (GO:0051693) | phagocytosis, engulfment (GO:0006911) | actin filament severing (GO:0051014) | positive regulation of protein processing in phagocytic vesicle (GO:1903923) | barbed-end actin filament capping (GO:0051016)	focal adhesion (GO:0005925) | lamellipodium (GO:0030027)	900.846	766.225	1009.15	397.671	463.34	452.013	288.371	420.546
FOS	AP-1 | C-FOS | D12Rfj1 | c-fos | cFos | p55 | xfos	ENSOARG00000001783	443218	7:83397872-83400138:+1	protein-coding	Fos proto-oncogene, AP-1 transcription factor subunit	chromatin binding (GO:0003682) | transcriptional activator activity, RNA polymerase II core promoter proximal region sequence-specific binding (GO:0001077) | protein binding (GO:0005515) | R-SMAD binding (GO:0070412) | RNA polymerase II core promoter proximal region sequence-specific DNA binding (GO:0000978) | transcription factor binding (GO:0008134) | sequence-specific DNA binding (GO:0043565) …	cellular response to reactive oxygen species (GO:0034614) | skeletal muscle cell differentiation (GO:0035914) | nervous system development (GO:0007399) | transforming growth factor beta receptor signaling pathway (GO:0007179) | regulation of transcription, DNA-templated (GO:0006355) | positive regulation of osteoclast differentiation (GO:0045672) | positive regulation of transcription from RNA po…	nucleus (GO:0005634) | transcription factor complex (GO:0005667) | nucleoplasm (GO:0005654)	512.042	635.303	1006.24	164.404	245.947	14.979	22.061	166.967
TXNIP	1200008J08Rik | AA682105 | EST01027 | HHCPA78 | Hyplip1 | THIF | Tbp-2 | VDUP1 | Vdup1	ENSOARG00000020658	654403	1:98336652-98340541:-1	protein-coding	thioredoxin interacting protein	protein binding (GO:0005515) | ubiquitin protein ligase binding (GO:0031625) | enzyme inhibitor activity (GO:0004857)	negative regulation of transcription from RNA polymerase II promoter (GO:0000122) | platelet-derived growth factor receptor signaling pathway (GO:0048008) | keratinocyte differentiation (GO:0030216) | negative regulation of cell division (GO:0051782) | cellular response to tumor cell (GO:0071228) | protein import into nucleus (GO:0006606) | response to oxidative stress (GO:0006979)	cytoplasm (GO:0005737)	1005.29	497.536	890.047	536.478	661.33	618.065	463.53	405.957
PDLIM3	AI463105 | ALP | Actn2lp | Alp | LIM | alp	ENSOARG00000007924	101113652	26:14450228-14478567:-1	protein-coding	PDZ and LIM domain 3	protein binding (GO:0005515) | metal ion binding (GO:0046872) | cytoskeletal protein binding (GO:0008092) | structural constituent of muscle (GO:0008307) | zinc ion binding (GO:0008270)	heart development (GO:0007507) | actin filament organization (GO:0007015)	actin cytoskeleton (GO:0015629) | cytoplasm (GO:0005737)	233.858	412.411	314.302	28.077	81.748	11.339	28.933	1004.82
CA3	CAIII | Car3 | GB11589 | car3	ENSOARG00000013116	101118196	9:89665649-89675609:-1	protein-coding	carbonic anhydrase 3	metal ion binding (GO:0046872) | nickel cation binding (GO:0016151) | carbonate dehydratase activity (GO:0004089) | zinc ion binding (GO:0008270)	one-carbon metabolic process (GO:0006730)	cytosol (GO:0005829) | cytoplasm (GO:0005737)	130.146	76.75	131.864	1.952	2.498	0.117	0.138	1004.14
CCNG1	AI314029 | CCNG | CYCG | Ccng | Cyclin-G1 | Cyclin-g1 | cb138 | ccng | cyclin-G1 | fd08g04 | sb:cb138 | wu:fb07e04 | wu:fd08g04 | zgc:56595	ENSOARG00000014048	101119213	5:72437264-72442474:+1	protein-coding	cyclin G1	protein binding (GO:0005515)	regulation of cell cycle (GO:0051726)	unknown	195.897	137.67	248.112	637.376	548.443	801.986	641.549	997.883
FN1	CIG | E330027I09 | ED-B | FIBNEC | FINC | FN | FNZ | Fn | Fn-1 | GFND | GFND2 | LETS | MSF | cig | fibronectin | finc | fn-1 | lets | msf	ENSOARG00000019329	100216462	2:216309354-216378137:-1	protein-coding	fibronectin 1	identical protein binding (GO:0042802) | protein binding (GO:0005515) | peptidase activator activity (GO:0016504) | protease binding (GO:0002020) | integrin binding (GO:0005178)	regulation of ERK1 and ERK2 cascade (GO:0070372) | peptide cross-linking (GO:0018149) | positive regulation of substrate-dependent cell migration, cell attachment to substrate (GO:1904237) | integrin activation (GO:0033622) | wound healing (GO:0042060) | endodermal cell differentiation (GO:0035987) | calcium-independent cell-matrix adhesion (GO:0007161) | cell-substrate junction assembly (GO:0007…	basement membrane (GO:0005604) | basal lamina (GO:0005605) | extracellular space (GO:0005615) | proteinaceous extracellular matrix (GO:0005578) | extracellular matrix (GO:0031012) | fibrinogen complex (GO:0005577) | extracellular exosome (GO:0070062) | extracellular region (GO:0005576) | endoplasmic reticulum-Golgi intermediate compartment (GO:0005793) | blood microparticle (GO:0072562) | apical …	712.246	996.465	674.85	68.754	83.113	35.244	20.248	39.908
PLAT	AU020998 | AW212668 | D8Ertd2e | PATISS | T-PA | TPA | si:ch211-220d9.5 | si:dkeyp-117b11.4 | t-pa | tPA | tpa	ENSOARG00000003130	101118332	26:35536329-35547219:-1	protein-coding	plasminogen activator, tissue type	protein binding (GO:0005515) | serine-type peptidase activity (GO:0008236) | hydrolase activity (GO:0016787) | receptor binding (GO:0005102) | serine-type endopeptidase activity (GO:0004252) | phosphoprotein binding (GO:0051219) | peptidase activity (GO:0008233)	platelet-derived growth factor receptor signaling pathway (GO:0048008) | response to hypoxia (GO:0001666) | negative regulation of proteolysis (GO:0045861) | proteolysis (GO:0006508) | plasminogen activation (GO:0031639) | smooth muscle cell migration (GO:0014909)	apical part of cell (GO:0045177) | extracellular space (GO:0005615) | cell surface (GO:0009986) | cytoplasm (GO:0005737) | secretory granule (GO:0030141) | extracellular exosome (GO:0070062) | extracellular region (GO:0005576)	560.129	996.364	577.846	9.709	8.563	5.86	4.748	3.435
TIMP2	CSC-21K | D11Bwg1104e | DDC8 | TIMP-2 | Timp-2 | fgtimp-2a | timp-2a	ENSOARG00000003264	.	11:52490463-52504223:+1	protein-coding	TIMP metallopeptidase inhibitor 2	protein binding (GO:0005515) | metalloendopeptidase inhibitor activity (GO:0008191)	negative regulation of endopeptidase activity (GO:0010951)	extracellular exosome (GO:0070062) | extracellular region (GO:0005576)	995.819	593.743	478.571	140.905	119.4	110.879	59.714	117.71
ENSOARG00000018343	.	ENSOARG00000018343	101117955	14:23525089-23525821:-1	protein-coding	.	metal ion binding (GO:0046872) | copper ion binding (GO:0005507) | zinc ion binding (GO:0008270)	negative regulation of growth (GO:0045926) | cellular zinc ion homeostasis (GO:0006882) | cellular metal ion homeostasis (GO:0006875) | nitric oxide mediated signal transduction (GO:0007263) | cellular response to zinc ion (GO:0071294) | negative regulation of neuron apoptotic process (GO:0043524) | detoxification of copper ion (GO:0010273) | cellular response to chromate (GO:0071247)	nucleus (GO:0005634) | cytosol (GO:0005829) | cytoplasm (GO:0005737) | perinuclear region of cytoplasm (GO:0048471) | lysosome (GO:0005764)	992.616	831.372	648.871	50.608	91.723	17.08	55.082	47.058
BANF1	BAF | BCRP1 | Baf | Bcrp1 | D14S1460 | L2bp1 | L2bp1/Baf | NGPS | baf | bcrp1 | fa01c01 | wu:fa01c01 | zgc:77767	ENSOARG00000001278	105616542	21:43400156-43400896:+1	protein-coding	barrier to autointegration factor 1	protein binding (GO:0005515) | DNA binding (GO:0003677)	DNA integration (GO:0015074)	nucleus (GO:0005634) | cytoplasm (GO:0005737) | nucleoplasm (GO:0005654) | extracellular exosome (GO:0070062)	703.288	728.128	850.295	921.505	802.932	516.07	989.747	620.77
HSBP1	0610007A03Rik | AA408769 | GRMZM2G085924 | Hsp25 | NPC-A-13 | SBP1 | npc-a-13	ENSOARG00000019602	105608906	2:125821052-125821255:-1	protein-coding	heat shock factor binding protein 1	protein binding (GO:0005515)	endodermal cell differentiation (GO:0035987)	unknown	957.275	935.981	985.661	523.387	590.19	398.441	570.307	321.358
CFL1	AA959946 | CFL | CFL2 | COFILIN | Cof | Cofilin-1 | HEL-S-15 | cfl | cfl2l | cofilin | cofilin-1 | wu:fb17d06 | wu:fb18d11 | wu:fd59f08 | wu:fj34b08 | xac1 | xac2	ENSOARG00000018107	494432	21:43277409-43278376:-1	protein-coding	cofilin-1	actin binding (GO:0003779) | protein binding (GO:0005515)	regulation of cell morphogenesis (GO:0022604) | positive regulation by host of viral process (GO:0044794) | regulation of dendritic spine morphogenesis (GO:0061001) | response to virus (GO:0009615) | cytoskeleton organization (GO:0007010) | actin filament depolymerization (GO:0030042)	intracellular (GO:0005622) | extracellular space (GO:0005615) | focal adhesion (GO:0005925) | actin cytoskeleton (GO:0015629) | cytoplasm (GO:0005737) | membrane (GO:0016020) | vesicle (GO:0031982) | extracellular exosome (GO:0070062)	821.086	983.53	759.224	235.521	292.587	218.649	192.031	140.078
PGAM2	D14Mgh1 | GSD10 | PGAM-M | PGAMM | Pgmut | pgam1 | zgc:63876	ENSOARG00000013633	101123502	19:294570-296796:-1	protein-coding	phosphoglycerate mutase 2	protein binding (GO:0005515) | isomerase activity (GO:0016853) | intramolecular transferase activity, phosphotransferases (GO:0016868) | catalytic activity (GO:0003824) | phosphoglycerate mutase activity (GO:0004619)	metabolic process (GO:0008152) | glycolytic process (GO:0006096) | striated muscle contraction (GO:0006941) | Notch signaling pathway (GO:0007219)	nucleus (GO:0005634) | extracellular exosome (GO:0070062)	5.586	4.39	97.519	442.269	299.088	269.257	976.486	940.555
MDH2	CG 7998 | CG7998 | Dmel\CG7998 | M-MDH | MDH | MDH-2 | MGC:3559 | MMDH | MOR1 | Mdh | Mdh-2 | Mor-1 | Mor1 | l(3)psg7 | m-mdh | mMDH | mMdh | mdh2 | mor1 | psg7 | wu:fj48c08 | wu:fj55d06 | zgc:64133	ENSOARG00000013650	443091	24:34164879-34177170:+1	protein-coding	malate dehydrogenase 2	oxidoreductase activity, acting on the CH-OH group of donors, NAD or NADP as acceptor (GO:0016616) | L-malate dehydrogenase activity (GO:0030060) | poly(A) RNA binding (GO:0044822) | malate dehydrogenase activity (GO:0016615) | oxidoreductase activity (GO:0016491) | catalytic activity (GO:0003824)	carbohydrate metabolic process (GO:0005975) | internal protein amino acid acetylation (GO:0006475) | malate metabolic process (GO:0006108) | carboxylic acid metabolic process (GO:0019752) | oxidation-reduction process (GO:0055114)	membrane (GO:0016020) | plasma membrane (GO:0005886) | mitochondrial inner membrane (GO:0005743) | extracellular exosome (GO:0070062) | myelin sheath (GO:0043209) | nucleus (GO:0005634) | nucleoplasm (GO:0005654) | mitochondrion (GO:0005739)	62.566	68.786	164.034	615.552	595.94	957.048	804.693	598.6
NDUFS5	AI256693 | CI-15k | CI15K | GB18086 | NDUS5 | NV30853 | Ndufs5b | zgc:111955	ENSOARG00000019983	101118232	1:13507108-13510324:+1	protein-coding	NADH:ubiquinone oxidoreductase subunit S5	unknown	mitochondrial respiratory chain complex I assembly (GO:0032981)	mitochondrial respiratory chain complex I (GO:0005747) | mitochondrion (GO:0005739)	587.586	534.209	607.169	799.433	775.073	929.278	953.893	813.809
ENSOARG00000000374	.	ENSOARG00000000374	.	AMGL01125976.1:246-4574:-1	protein-coding	ribosomal protein L27a	structural constituent of ribosome (GO:0003735)	translation (GO:0006412)	large ribosomal subunit (GO:0015934) | intracellular ribonucleoprotein complex (GO:0030529) | ribosome (GO:0005840)	952.275	871.032	855.206	329.642	346.773	346.977	304.681	462.628
ENSOARG00000016318	.	ENSOARG00000016318	.	3:82753378-82753683:+1	protein-coding	Uncharacterized protein	structural constituent of ribosome (GO:0003735)	translation (GO:0006412)	ribosome (GO:0005840)	927.474	874.271	764.854	350.77	323.892	819.887	321.138	951.274
PAM	PAL | PHM | pal | phm | si:dkeyp-35f12.2	ENSOARG00000018405	101112815	5:99119457-99319778:+1	protein-coding	peptidylglycine alpha-amidating monooxygenase	oxidoreductase activity, acting on paired donors, with incorporation or reduction of molecular oxygen, reduced ascorbate as one donor, and incorporation of one atom of oxygen (GO:0016715) | protein binding (GO:0005515) | monooxygenase activity (GO:0004497) | copper ion binding (GO:0005507) | catalytic activity (GO:0003824) | peptidylglycine monooxygenase activity (GO:0004504) | peptidylamidoglyco…	peptide metabolic process (GO:0006518) | peptide amidation (GO:0001519) | oxidation-reduction process (GO:0055114)	membrane (GO:0016020) | extracellular exosome (GO:0070062)	225.837	229.395	177.173	949.253	871.542	138.289	39.673	34.576
TXN	TRDX | TRX | TRX1 | Trx | Txn1 | trx | trx1 | zgc:92903	ENSOARG00000006916	443439	2:13016557-13028295:+1	protein-coding	thioredoxin	peptide disulfide oxidoreductase activity (GO:0015037) | protein binding (GO:0005515) | poly(A) RNA binding (GO:0044822) | protein disulfide oxidoreductase activity (GO:0015035)	mitotic nuclear division (GO:0007067) | glycerol ether metabolic process (GO:0006662) | regulation of transcription, DNA-templated (GO:0006355) | positive regulation of peptidyl-serine phosphorylation (GO:0033138) | cell redox homeostasis (GO:0045454) | negative regulation of transcription from RNA polymerase II promoter (GO:0000122) | negative regulation of protein export from nucleus (GO:004682…	spliceosomal complex (GO:0005681) | nucleus (GO:0005634) | cytosol (GO:0005829) | cytoplasm (GO:0005737) | mitochondrion (GO:0005739) | extracellular exosome (GO:0070062) | extracellular region (GO:0005576)	703.513	941.87	623.753	229.195	247.345	224.413	230.201	212.664
RPL28	BcDNA:GH04183 | CG12740 | CYH2 | D7Wsu21e | DDBDRAFT_0204893 | DDBDRAFT_0214936 | DDB_0204893 | DDB_0214936 | Dmel\CG12740 | GB13975 | GH04183p | L28 | RL28 | anon-WO0118547.321 | chr3L:3205394..3205484 | l28 | rpl28l | zgc:66289	ENSOARG00000001428	101120598	14:59371966-59374232:-1	protein-coding	ribosomal protein L28	protein binding (GO:0005515) | poly(A) RNA binding (GO:0044822) | structural constituent of ribosome (GO:0003735)	regulation of mitophagy (GO:1903146) | positive regulation of protein targeting to mitochondrion (GO:1903955) | translation (GO:0006412)	cytosolic large ribosomal subunit (GO:0022625) | cell body (GO:0044297) | dendrite (GO:0030425) | membrane (GO:0016020) | ribosome (GO:0005840) | extracellular exosome (GO:0070062) | intracellular (GO:0005622) | cytoplasmic ribonucleoprotein granule (GO:0036464) | cytoplasm (GO:0005737)	941.225	926.843	930.689	361.695	344.837	356.166	365.151	550.994
GNG5	G(y)5 | GBG5 | ik:tdsubc_2c12 | xx:tdsubc_2c12 | zgc:100880	ENSOARG00000013925	.	1:60900356-60904692:-1	protein-coding	G protein subunit gamma 5	PDZ domain binding (GO:0030165) | protein binding (GO:0005515) | signal transducer activity (GO:0004871)	G-protein coupled receptor signaling pathway (GO:0007186) | positive regulation of neural precursor cell proliferation (GO:2000179) | signal transduction (GO:0007165) | positive regulation of secondary heart field cardioblast proliferation (GO:0072513)	heterotrimeric G-protein complex (GO:0005834) | membrane (GO:0016020) | plasma membrane (GO:0005886) | mitochondrion (GO:0005739) | extracellular exosome (GO:0070062)	788.139	844.863	891.141	569.624	599.204	781.709	938.525	422.638
ENSOARG00000008800	.	ENSOARG00000008800	494436	20:26649266-26651197:-1	protein-coding	Uncharacterized protein	ATP binding (GO:0005524) | nucleotide binding (GO:0000166)	cell morphogenesis (GO:0000902)	unknown	694.66	560.248	935.471	174.308	307.781	70.478	66.399	529.186
ENSOARG00000011123	.	ENSOARG00000011123	.	11:55286750-55294990:+1	protein-coding	Small ubiquitin-related modifier	protein binding (GO:0005515)	protein sumoylation (GO:0016925)	nucleus (GO:0005634)	866.871	932.674	873.244	350.976	381.72	253.575	283.132	229.582
CCDC80	2610001E17Rik | CL2 | DRO1 | Dro1 | SSG-1 | SSG1 | Ssg1 | URB | Urb | cequarin | dro1 | equarin-S | okuribin | si:bz20i5.2 | ssg1 | urb | zgc:113236	ENSOARG00000019332	101122067	1:175729335-175762809:-1	protein-coding	coiled-coil domain containing 80	fibronectin binding (GO:0001968) | glycosaminoglycan binding (GO:0005539) | heparin binding (GO:0008201)	positive regulation of cell-substrate adhesion (GO:0010811) | extracellular matrix organization (GO:0030198)	basement membrane (GO:0005604) | proteinaceous extracellular matrix (GO:0005578) | interstitial matrix (GO:0005614)	930.33	896.581	615.342	143.728	100.634	70.013	42.772	77.166
ENSOARG00000002722	.	ENSOARG00000002722	101112891	JH922753.1:21-3142:+1	protein-coding	Uncharacterized protein	unknown	unknown	extracellular space (GO:0005615)	929.232	495.548	431.975	96.95	122.752	15.863	18.247	3.49
JUNB	AP-1	ENSOARG00000010854	443117	5:10817372-10818283:-1	protein-coding	JunB proto-oncogene, AP-1 transcription factor subunit	sequence-specific DNA binding (GO:0043565) | transcriptional activator activity, RNA polymerase II core promoter proximal region sequence-specific binding (GO:0001077) | protein binding (GO:0005515) | DNA binding (GO:0003677) | RNA polymerase II core promoter proximal region sequence-specific DNA binding (GO:0000978) | RNA polymerase II regulatory region sequence-specific DNA binding (GO:0000977)…	osteoblast differentiation (GO:0001649) | positive regulation of cell differentiation (GO:0045597) | regulation of transcription, DNA-templated (GO:0006355) | embryonic process involved in female pregnancy (GO:0060136) | trophectodermal cell differentiation (GO:0001829) | positive regulation of transcription from RNA polymerase II promoter (GO:0045944) | cellular response to calcium ion (GO:00712…	nucleoplasm (GO:0005654)	756.065	921.194	718.456	48.248	71.092	21.026	12.668	46.081
CAV1	BSCL3 | CGL3 | Cav | Cav-1 | Caveolin-1 | LCCNS | MSTP085 | PPH3 | VIP21 | bscl3 | cav | cav-1 | caveolin 1 | caveolin-1 | cgl3 | fc07c04 | mstp085 | vip21 | wu:fc07c04	ENSOARG00000001337	445468	4:51786039-51820791:-1	protein-coding	caveolin 1	protein binding (GO:0005515) | nitric-oxide synthase binding (GO:0050998) | peptidase activator activity (GO:0016504) | receptor binding (GO:0005102) | protein binding, bridging (GO:0030674) | enzyme binding (GO:0019899) | structural molecule activity (GO:0005198) | identical protein binding (GO:0042802) | Rac GTPase binding (GO:0048365) | protein complex scaffold (GO:0032947) | ion channel bindi…	vasoconstriction (GO:0042310) | positive regulation of gap junction assembly (GO:1903598) | negative regulation of transforming growth factor beta receptor signaling pathway (GO:0030512) | triglyceride metabolic process (GO:0006641) | positive regulation of peptidyl-serine phosphorylation (GO:0033138) | negative regulation of pinocytosis (GO:0048550) | regulation of membrane repolarization during…	protein complex (GO:0043234) | Golgi apparatus (GO:0005794) | acrosomal membrane (GO:0002080) | plasma membrane (GO:0005886) | endoplasmic reticulum (GO:0005783) | intracellular (GO:0005622) | endosome (GO:0005768) | cytoplasmic vesicle (GO:0031410) | cell cortex (GO:0005938) | membrane raft (GO:0045121) | perinuclear region of cytoplasm (GO:0048471) | integral component of plasma membrane (GO:00…	561.677	919.543	675.176	339.996	399.257	249.117	271.126	133.078
ATP5C1	1700094F02Rik | ATP5C | ATP5CL1 | ATPG | DDBDRAFT_0184316 | DDBDRAFT_0237782 | DDB_0184316 | DDB_0237782 | GB15291 | wu:fk34c05 | zgc:73209	novel transcript reconstruction	.	undetermined	protein-coding	ATP synthase, H+ transporting, mitochondrial F1 complex, gamma polypeptide 1	unknown	unknown	unknown	171.775	184.455	268.209	652.558	673.891	913.282	792.697	604.032
TPI1	AI255506 | HEL-S-49 | TIM | TPI | TPID | TPIS | Tpi | Tpi-1 | tpi | tpi-b	ENSOARG00000005428	.	3:207527997-207529618:-1	protein-coding	triosephosphate isomerase 1	protein binding (GO:0005515) | ubiquitin protein ligase binding (GO:0031625) | isomerase activity (GO:0016853) | triose-phosphate isomerase activity (GO:0004807) | catalytic activity (GO:0003824)	metabolic process (GO:0008152) | glyceraldehyde-3-phosphate metabolic process (GO:0019682) | glycolytic process (GO:0006096) | gluconeogenesis (GO:0006094) | multicellular organism development (GO:0007275) | glucose metabolic process (GO:0006006)	nucleus (GO:0005634) | extracellular space (GO:0005615) | extracellular exosome (GO:0070062)	167.447	174.387	226.736	373.356	429.522	338.825	443.03	911.323
TAGLN2	2700094C18Rik | HA1756 | SM22beta | Sm22B | Sm22a | cb223 | fa92e03 | fi27b02 | sm22-a | sm22-alpha | sm22[a] | tagln3 | wu:fa92e03 | wu:fb11g09 | wu:fi27b02	ENSOARG00000008078	.	1:109259091-109265735:-1	protein-coding	transgelin 2	protein binding (GO:0005515) | actin filament binding (GO:0051015)	epithelial cell differentiation (GO:0030855)	vesicle (GO:0031982) | extracellular exosome (GO:0070062)	549.269	908.563	698.162	162.349	156.44	103.855	90.683	85.767
SAT1	AA617398 | Ab2-402 | DC21 | GIP3 | GRMZM2G069203 | KFSD | KFSDX | SAT | SSAT | SSAT-1 | Sat | dc21 | kfsd | kfsdx | sat | ssat | ssat-1	ENSOARG00000016798	101113463	X:21149594-21152140:+1	protein-coding	spermidine/spermine N1-acetyltransferase 1	protein binding (GO:0005515) | N-acetyltransferase activity (GO:0008080)	metabolic process (GO:0008152) | regulation of cell proliferation (GO:0042127) | angiogenesis (GO:0001525)	intracellular (GO:0005622)	907.283	692.254	640.731	197.066	259.165	107.053	162.366	76.534
EEF1A2	EEF1A-2 | EEF1AL | EF-1-alpha-2 | EF1A | EIEE33 | Eef1a | HS1 | MRD38 | Ps10 | RATPS10 | S1 | STN | STNL | Stnl | eef1al | ef1a | stnl | wasted | wst | zgc:92085	ENSOARG00000011052	.	13:53482080-53488365:+1	protein-coding	eukaryotic translation elongation factor 1 alpha 2	protein binding (GO:0005515) | protein kinase binding (GO:0019901) | GTPase activity (GO:0003924) | translation elongation factor activity (GO:0003746) | nucleotide binding (GO:0000166) | GTP binding (GO:0005525)	positive regulation of apoptotic process (GO:0043065) | positive regulation of lipid kinase activity (GO:0090218) | translational elongation (GO:0006414)	myelin sheath (GO:0043209) | cytoplasm (GO:0005737) | eukaryotic translation elongation factor 1 complex (GO:0005853)	1.48	0.5	159.95	587.559	514.469	454.629	885.209	768.651
ENSOARG00000019122	.	ENSOARG00000019122	101118186	5:6432303-6433157:-1	protein-coding	.	protein binding (GO:0005515) | nucleic acid binding (GO:0003676) | metal ion binding (GO:0046872) | transcription factor activity, sequence-specific DNA binding (GO:0003700)	positive regulation of nitric oxide biosynthetic process (GO:0045429) | positive regulation of transcription from RNA polymerase II promoter in response to stress (GO:0036003) | positive regulation of protein metabolic process (GO:0051247) | multicellular organism growth (GO:0035264) | positive regulation of transcription from RNA polymerase II promoter (GO:0045944) | regulation of gene expressio…	nucleus (GO:0005634)	447.179	631.563	883.816	144.503	161.589	121.238	48.876	86.75
S100A13	S100A1 | S100A16	ENSOARG00000002404	101111171	AMGL01123244.1:2225-7923:+1	protein-coding	S100 calcium binding protein A13	protein binding (GO:0005515) | fibroblast growth factor binding (GO:0017134) | calcium ion binding (GO:0005509) | protein homodimerization activity (GO:0042803) | copper ion binding (GO:0005507) | RAGE receptor binding (GO:0050786) | zinc ion binding (GO:0008270)	cytokine secretion (GO:0050663) | interleukin-1 alpha secretion (GO:0050703) | positive regulation of I-kappaB kinase/NF-kappaB signaling (GO:0043123)	nucleus (GO:0005634) | extracellular space (GO:0005615) | cytosol (GO:0005829) | cytoplasm (GO:0005737) | perinuclear region of cytoplasm (GO:0048471) | extracellular exosome (GO:0070062)	883.337	745.465	850.816	190.252	198.57	119.601	113.992	73.057
ENSOARG00000013155	.	ENSOARG00000013155	.	11:56151620-56152593:-1	protein-coding	.	structural constituent of ribosome (GO:0003735)	translation (GO:0006412)	intracellular (GO:0005622) | intracellular ribonucleoprotein complex (GO:0030529) | ribosome (GO:0005840)	694.122	607.827	609.106	272.844	283.871	411.834	242.007	882.555
ENSOARG00000005262	.	ENSOARG00000005262	.	16:12181214-12181456:-1	protein-coding	Uncharacterized protein	cytochrome-c oxidase activity (GO:0004129)	hydrogen ion transmembrane transport (GO:1902600)	mitochondrial respiratory chain (GO:0005746)	171.566	217.952	303.844	674.698	685.03	648.354	881.85	706.19
NMRK2	2310015C21Rik | ITGB1BP3 | Itgb1bp3 | MIBP | Mibp | NRK2 | itgb1bp3 | zgc:103408	ENSOARG00000011323	101114607	5:17629206-17633291:-1	protein-coding	nicotinamide riboside kinase 2	protein binding (GO:0005515)	negative regulation of myoblast differentiation (GO:0045662)	intracellular (GO:0005622)	0.407	0.03	105.032	505.005	536.971	410.981	863.301	280.977
MYH1	A530084A17Rik | E19 | HEL71 | IId | IId/x | MHC | MHC-2X/D | MHC2X/D | MYH4 | MYHC | MYHC-2X | MYHC-2d | MYHC-IIX | MYHSA1 | MYHa | MdMs | MyHC-2X/D | MyHC-2x | MyHC-IId/x | MyHC-IIx/d | MyHC2x | Myhs-f | Myhs-f2 | Myhsf2 | myh	ENSOARG00000011486	442994	11:29027985-29055065:-1	protein-coding	myosin, heavy chain 1, skeletal muscle, adult	ATP binding (GO:0005524) | actin binding (GO:0003779) | protein binding (GO:0005515) | motor activity (GO:0003774) | nucleotide binding (GO:0000166)	metabolic process (GO:0008152)	cytoplasmic ribonucleoprotein granule (GO:0036464) | myosin complex (GO:0016459) | intercalated disc (GO:0014704) | A band (GO:0031672) | muscle myosin complex (GO:0005859)	0.316	0.258	0.251	0.162	0.196	0.199	0.19	856.824
GYPC	0610037F22Rik | CD236 | CD236R | Cd236r | GE | GPC | GPD | GYPD | PAS-2 | PAS-2' | cd236 | cd236r | fj41h10 | gpc | gpcb | gpd | gypd | wu:fj41h10	ENSOARG00000013621	.	2:191572516-191575538:+1	protein-coding	glycophorin C (Gerbich blood group)	protein binding (GO:0005515)	unknown	cortical cytoskeleton (GO:0030863) | membrane (GO:0016020)	59.526	75.923	210.374	796.33	583.804	517.233	856.586	191.915
ENSOARG00000025176	.	ENSOARG00000025176	105614854	3:207312560-207312997:+1	protein-coding	.	calcium ion binding (GO:0005509)	unknown	unknown	746.003	853.075	649.214	270.824	268.292	272.002	260.855	270.583
DDX5	2600009A06Rik | DDBDRAFT_0191737 | DDBDRAFT_0266367 | DDB_0191737 | DDB_0266367 | G17P1 | HLR1 | HUMP68 | Hlr1 | p68 | wu:fa56a07 | wu:fb11e01 | wu:fb16c10 | wu:fb53b05	ENSOARG00000015045	101106186	11:48096623-48102912:-1	protein-coding	DEAD-box helicase 5	transcription cofactor activity (GO:0003712) | protein binding (GO:0005515) | estrogen receptor binding (GO:0030331) | nucleic acid binding (GO:0003676) | RNA helicase activity (GO:0003724) | hydrolase activity (GO:0016787) | androgen receptor binding (GO:0050681) | nucleotide binding (GO:0000166) | hydrolase activity, acting on acid anhydrides, in phosphorus-containing anhydrides (GO:0016818) | …	positive regulation of DNA damage response, signal transduction by p53 class mediator (GO:0043517) | regulation of alternative mRNA splicing, via spliceosome (GO:0000381) | mRNA transcription (GO:0009299) | regulation of nucleic acid-templated transcription (GO:1903506) | negative regulation of transcription from RNA polymerase II promoter (GO:0000122) | positive regulation of transcription from …	catalytic step 2 spliceosome (GO:0071013) | intracellular ribonucleoprotein complex (GO:0030529) | nucleus (GO:0005634) | nucleolus (GO:0005730) | membrane (GO:0016020) | nucleoplasm (GO:0005654) | extracellular exosome (GO:0070062)	634.425	837.991	611.429	202.168	231.279	248.727	181.464	152.297
GNG10	AV006524 | GBG10	ENSOARG00000002977	.	2:11798814-11798951:-1	protein-coding	G protein subunit gamma 10	protein binding (GO:0005515) | signal transducer activity (GO:0004871)	G-protein coupled receptor signaling pathway (GO:0007186) | signal transduction (GO:0007165)	heterotrimeric G-protein complex (GO:0005834) | membrane (GO:0016020) | plasma membrane (GO:0005886) | extracellular exosome (GO:0070062)	657.781	836.324	723.508	153.403	190.365	180.524	147.069	401.836
ENSOARG00000018341	.	ENSOARG00000018341	101117691	14:23505870-23518073:-1	protein-coding	Metallothionein-1A	metal ion binding (GO:0046872) | zinc ion binding (GO:0008270)	negative regulation of growth (GO:0045926) | cellular response to zinc ion (GO:0071294)	nucleus (GO:0005634) | cytoplasm (GO:0005737) | perinuclear region of cytoplasm (GO:0048471)	662.321	830.619	468.191	28.031	35.324	14.974	26.705	36.794
DUSP1	3CH134 | CL100 | HVH1 | MKP-1 | MKP1 | Mkp1 | PTPN10 | Ptpn16 | U19515 | XCL100 | cb269 | cl100 | dusp1-a | erp | hvh1 | id:ibd2586 | mkp-1 | mkp1 | ptpn10 | sb:cb269 | wu:fd19g02 | wu:fe50g09 | zgc:55920	ENSOARG00000003963	101107632	16:4579276-4581446:-1	protein-coding	dual specificity phosphatase 1	protein binding (GO:0005515) | hydrolase activity (GO:0016787) | phosphatase activity (GO:0016791) | phosphoprotein phosphatase activity (GO:0004721) | protein tyrosine/serine/threonine phosphatase activity (GO:0008138) | protein tyrosine phosphatase activity (GO:0004725) | MAP kinase tyrosine/serine/threonine phosphatase activity (GO:0017017)	negative regulation of MAP kinase activity (GO:0043407) | protein dephosphorylation (GO:0006470) | inactivation of MAPK activity (GO:0000188) | dephosphorylation (GO:0016311) | peptidyl-tyrosine dephosphorylation (GO:0035335)	nucleus (GO:0005634) | cytoplasm (GO:0005737)	563.179	579.459	818.481	162.017	200.552	61.986	39.785	282.128
IER3	AI663993 | DIF-2 | DIF2 | Dif2 | GLY96 | IEX-1 | IEX-1L | IEX1 | Iex1 | Ler3 | PRG1 | Prg1 | cI-3 | gly96	ENSOARG00000011463	101108867	20:27350693-27351260:+1	protein-coding	immediate early response 3	protein binding (GO:0005515)	negative regulation of apoptotic process (GO:0043066) | regulation of response to DNA damage stimulus (GO:2001020)	nucleus (GO:0005634)	377.635	814.341	686.167	53.708	47.48	58.834	41.516	57.154
PF4 (assigned to ENSOARG00000014766)	.	ENSOARG00000014766	101104401	6:88584559-88585388:+1	protein-coding	platelet factor 4 (C-X-C motif chemokine ligand 4)	chemokine activity (GO:0008009) | cytokine activity (GO:0005125) | heparin binding (GO:0008201)	chemotaxis (GO:0006935) | leukocyte chemotaxis (GO:0030595) | immune response (GO:0006955) | platelet activation (GO:0030168)	extracellular space (GO:0005615) | extracellular region (GO:0005576)	153.651	559.475	813.26	4.488	8.37	2.187	0.87	1.093
ITM2C	3110038L02Rik | BRI3 | BRICD2C | Bricd2c | E25 | E25C | ITM3	ENSOARG00000020673	.	2:231740173-231752466:+1	protein-coding	integral membrane protein 2C	ATP binding (GO:0005524) | protein binding (GO:0005515) | beta-amyloid binding (GO:0001540)	neuron differentiation (GO:0030182) | positive regulation of extrinsic apoptotic signaling pathway (GO:2001238) | negative regulation of neuron projection development (GO:0010977)	Golgi apparatus (GO:0005794) | plasma membrane (GO:0005886) | perinuclear region of cytoplasm (GO:0048471) | lysosome (GO:0005764) | extracellular exosome (GO:0070062)	617.675	594.611	812.344	64.484	82.254	29.95	27.545	23.732
MINOS1	2310028O11Rik | C1orf151 | MIO10 | Mic10 | RAB11FIP4 | RGD1560187 | si:ch211-286f9.4 | wu:fj49a01 | zgc:153623	ENSOARG00000014483	101102990	9:44712827-44713063:+1	protein-coding	mitochondrial inner membrane organizing system 1	protein binding (GO:0005515)	unknown	mitochondrion (GO:0005739)	471.007	467.839	521.674	547.966	583.875	614.459	811.893	532.909
PPP1R1A	0610038N18Rik | I-1 | I1 | IPP-1 | IPP1 | pil	ENSOARG00000016096	.	3:131849883-131853136:+1	protein-coding	protein phosphatase 1 regulatory inhibitor subunit 1A	protein binding (GO:0005515) | protein phosphatase inhibitor activity (GO:0004864)	signal transduction (GO:0007165) | negative regulation of catalytic activity (GO:0043086)	unknown	6.023	16.182	52.207	57.243	51.353	50.962	101.353	811.451
ENSOARG00000019570	.	ENSOARG00000019570	101116886	2:116520635-116520889:+1	protein-coding	Uncharacterized protein	cytochrome-c oxidase activity (GO:0004129)	hydrogen ion transmembrane transport (GO:1902600)	mitochondrial respiratory chain (GO:0005746)	141.383	163.146	217.061	528.87	527.484	788.215	710.458	811.32
YBX1	1700102N10Rik | BP-8 | Byb1 | C79409 | CBF-A | CSDA2 | CSDB | Cbfa | DBPB | Dbpb | EF1A | EFI-A | Ef1a | MDR-NF1 | MSY1 | Msy1 | NSEP-1 | NSEP1 | Nsep1 | YB-1 | YB1 | Yb1 | bp-8 | csda2 | csdb | dbpB | dbpb | frgy1 | fruYP1 | hm:zeh0308 | mYB-1a | mdr-nf1 | nsep-1 | nsep1 | pYBalpha | wu:fb01g10 | wu:fb08c05 | wu:fb16e10 | wu:fj26c09 | yb-1 | yb1 | zfY1 | zgc:85599	ENSOARG00000020447	.	1:16961480-16979580:+1	protein-coding	Y-box binding protein 1	chromatin binding (GO:0003682) | RNA binding (GO:0003723) | transcriptional activator activity, RNA polymerase II core promoter proximal region sequence-specific binding (GO:0001077) | protein binding (GO:0005515) | nucleic acid binding (GO:0003676) | RNA polymerase II core promoter proximal region sequence-specific DNA binding (GO:0000978) | GTPase binding (GO:0051020) | single-stranded DNA bind…	negative regulation of transcription from RNA polymerase II promoter (GO:0000122) | positive regulation of transcription from RNA polymerase II promoter (GO:0045944) | regulation of transcription, DNA-templated (GO:0006355) | CRD-mediated mRNA stabilization (GO:0070934) | negative regulation of striated muscle cell differentiation (GO:0051154) | protein localization to cytoplasmic stress granule …	CRD-mediated mRNA stability complex (GO:0070937) | cytoplasmic stress granule (GO:0010494) | nuclear membrane (GO:0031965) | U12-type spliceosomal complex (GO:0005689) | extracellular exosome (GO:0070062) | intracellular membrane-bounded organelle (GO:0043231) | nucleus (GO:0005634) | intracellular ribonucleoprotein complex (GO:0030529) | cytoplasm (GO:0005737) | histone pre-mRNA 3'end processing…	385.338	398.68	417.916	607.242	582.69	810.167	676.953	722.787
PYGM	AI115133 | Muscpho | PG | pygb	ENSOARG00000008997	442998	21:42295599-42307126:-1	protein-coding	phosphorylase, glycogen, muscle	protein binding (GO:0005515) | transferase activity (GO:0016740) | phosphorylase activity (GO:0004645) | pyridoxal phosphate binding (GO:0030170) | transferase activity, transferring glycosyl groups (GO:0016757) | glycogen phosphorylase activity (GO:0008184) | catalytic activity (GO:0003824)	metabolic process (GO:0008152) | carbohydrate metabolic process (GO:0005975) | glycogen catabolic process (GO:0005980) | glycogen metabolic process (GO:0005977)	extracellular exosome (GO:0070062)	2.285	1.222	22.916	159.089	173.984	108.717	217.077	809.138
OAZ1	AZ-1 | AZ1 | AZI | Antizyme | OAZ | ODC-Az | ODCAC | Oaz | YPL052W-A | az | azi | azs | oaz | oaz1a | oaz1s	ENSOARG00000014083	.	5:18847027-18848494:-1	protein-coding	ornithine decarboxylase antizyme 1	protein binding (GO:0005515) | enzyme inhibitor activity (GO:0004857) | ornithine decarboxylase inhibitor activity (GO:0008073)	polyamine metabolic process (GO:0006595) | negative regulation of catalytic activity (GO:0043086) | positive regulation of intracellular protein transport (GO:0090316) | positive regulation of protein catabolic process (GO:0045732) | negative regulation of polyamine transmembrane transport (GO:1902268)	cytosol (GO:0005829)	801.635	775.037	750.744	553.989	521.842	490.901	490.705	637.878
ENSOARG00000007775	.	ENSOARG00000007775	.	4:65387133-65430981:-1	protein-coding	Uncharacterized protein	water transmembrane transporter activity (GO:0005372) | transporter activity (GO:0005215) | ephrin receptor binding (GO:0046875) | potassium ion transmembrane transporter activity (GO:0015079)	maintenance of symbiont-containing vacuole by host (GO:0085018) | lateral ventricle development (GO:0021670) | corticotropin secretion (GO:0051458) | camera-type eye morphogenesis (GO:0048593) | potassium ion transport (GO:0006813) | wound healing (GO:0042060) | water transport (GO:0006833) | metanephric glomerulus vasculature development (GO:0072239) | glomerular filtration (GO:0003094) | water …	integral component of membrane (GO:0016021) | basolateral plasma membrane (GO:0016323) | plasma membrane (GO:0005886) | membrane (GO:0016020) | extracellular exosome (GO:0070062) | brush border (GO:0005903) | axon (GO:0030424) | symbiont-containing vacuole (GO:0020003) | apical plasma membrane (GO:0016324)	343.141	790.696	456.222	86.911	93.458	39.375	50.469	23.028
YBX3	CSDA | CSDA1 | Csda | DBPA | Dbpa | Dpba | MSY3 | MSY4 | YB-A | Yb2 | ZONAB | csda | csda1 | dbpA | dbpa | dpbA | oxyR | zonab	ENSOARG00000020919	.	3:203756536-203779296:+1	protein-coding	Y-box binding protein 3	protein binding (GO:0005515) | nucleic acid binding (GO:0003676) | mRNA 3'-UTR binding (GO:0003730) | single-stranded DNA binding (GO:0003697) | DNA binding (GO:0003677) | poly(A) RNA binding (GO:0044822) | RNA polymerase II regulatory region sequence-specific DNA binding (GO:0000977) | transcriptional repressor activity, RNA polymerase II transcription regulatory region sequence-specific binding…	cellular hyperosmotic response (GO:0071474) | negative regulation of apoptotic process (GO:0043066) | negative regulation of necroptotic process (GO:0060546) | regulation of transcription, DNA-templated (GO:0006355) | positive regulation of organ growth (GO:0046622) | fertilization (GO:0009566) | cellular response to tumor necrosis factor (GO:0071356) | negative regulation of transcription from R…	polysome (GO:0005844) | intracellular ribonucleoprotein complex (GO:0030529) | nucleus (GO:0005634) | cytoplasm (GO:0005737)	120.138	136.308	133.543	104.497	112.5	98.803	132.754	786.883
ATP5D	0610008F14Rik | 1500000I11Rik | AA960090 | AI876556 | AU020773 | C85518 | DDBDRAFT_0216607 | DDBDRAFT_0238330 | DDB_0216607 | DDB_0238330 | GB17255 | fk58f09 | wu:fk58f09 | zgc:73303	ENSOARG00000011366	101117502	5:41079969-41081578:+1	protein-coding	ATP synthase, H+ transporting, mitochondrial F1 complex, delta subunit	proton-transporting ATP synthase activity, rotational mechanism (GO:0046933) | ATPase activity (GO:0016887) | proton-transporting ATPase activity, rotational mechanism (GO:0046961)	ATP synthesis coupled proton transport (GO:0015986)	mitochondrial proton-transporting ATP synthase complex (GO:0005753) | proton-transporting ATP synthase complex, catalytic core F(1) (GO:0045261) | mitochondrion (GO:0005739) | mitochondrial inner membrane (GO:0005743)	150.247	159.07	255.627	623.763	571.244	695.373	778.011	390.226
ENSOARG00000004432	.	ENSOARG00000004432	.	13:17485244-17485453:+1	protein-coding	Uncharacterized protein	structural constituent of ribosome (GO:0003735)	translation (GO:0006412)	intracellular (GO:0005622) | intracellular ribonucleoprotein complex (GO:0030529) | ribosome (GO:0005840)	777.546	689.458	750.627	288.627	323.779	348.962	285.631	654.441
SRGN	PPG | PRG | PRG1 | Pgsg | Prg | Prg1 | Sgc | fk86b08 | si:dkey-226b20.6 | wu:fk86b08	ENSOARG00000005322	101107327	25:25281233-25295563:+1	protein-coding	serglycin	protein binding (GO:0005515)	T cell secretory granule organization (GO:0033371) | mast cell secretory granule organization (GO:0033364) | protein processing (GO:0016485) | maintenance of granzyme B location in T cell secretory granule (GO:0033382) | negative regulation of bone mineralization (GO:0030502) | granzyme-mediated apoptotic signaling pathway (GO:0008626) | negative regulation of cytokine secretion (GO:0050710) | ma…	extracellular space (GO:0005615) | Golgi apparatus (GO:0005794) | mast cell granule (GO:0042629)	541.815	692.114	772.87	68.376	67.314	46.25	38.261	25.668
PEBP1/ENSOARG:02966 (assigned to ENSOARG00000002966)	.	ENSOARG00000002966	101108954	17:56657318-56661054:-1	protein-coding	phosphatidylethanolamine binding protein 1	unknown	unknown	unknown	769.353	654.391	670.889	500.466	468.203	291.129	433.351	280.078
RPL6/ENSOARG:04648 (assigned to ENSOARG00000004648)	.	ENSOARG00000004648	.	17:53141911-53142774:+1	protein-coding	ribosomal protein L6	structural constituent of ribosome (GO:0003735)	translation (GO:0006412)	intracellular (GO:0005622) | intracellular ribonucleoprotein complex (GO:0030529) | ribosome (GO:0005840)	768.112	760.323	694.645	321.457	277.212	501.883	276.526	669.512
UQCRFS1 (assigned to ENSOARG00000004471)	.	ENSOARG00000004471	101113001	14:391843-396460:-1	protein-coding	ubiquinol-cytochrome c reductase, Rieske iron-sulfur polypeptide 1	2 iron, 2 sulfur cluster binding (GO:0051537) | oxidoreductase activity, acting on diphenols and related substances as donors (GO:0016679) | ubiquinol-cytochrome-c reductase activity (GO:0008121) | iron-sulfur cluster binding (GO:0051536) | metal ion binding (GO:0046872) | oxidoreductase activity (GO:0016491)	hydrogen ion transmembrane transport (GO:1902600) | oxidation-reduction process (GO:0055114)	respiratory chain (GO:0070469) | membrane (GO:0016020) | mitochondrion (GO:0005739) | mitochondrial inner membrane (GO:0005743)	74.215	81.814	160.221	663.943	632.75	767.868	728.043	724.102
BSG	135/10 | 5A11 | 5F7 | AI115436 | AI325119 | Basigin | BcDNA:GH21853 | CD147 | CE9 | CG31605 | DKFZP468I1928 | Dmel\CG31605 | EMMPRIN | GB11183 | HT-7 | HT7 | M6 | NP6293 | OK | Ox47R | RPE7 | TCSF | basignin | bsg | gel | l(2)06243 | l(2)SH1217 | l(2)SH2 1217 | l(2)k06338 | l(2)k09030 | l(2)k13638 | l(2)k14308 | ms(2)08318 | wu:fb26a05 | wu:fo98e12	ENSOARG00000008783	101114353	5:40597750-40604316:+1	protein-coding	basigin (Ok blood group)	protein binding (GO:0005515)	unknown	acrosomal membrane (GO:0002080) | focal adhesion (GO:0005925) | plasma membrane (GO:0005886) | membrane (GO:0016020) | mitochondrion (GO:0005739) | extracellular exosome (GO:0070062)	330.286	314.686	397.766	620.611	590.012	767	596.716	306.882
RPL6/ENSOARG:09765 (assigned to ENSOARG00000009765)	.	ENSOARG00000009765	100135440	17:61490122-61494162:+1	protein-coding	ribosomal protein L6	structural constituent of ribosome (GO:0003735)	translation (GO:0006412)	intracellular (GO:0005622) | intracellular ribonucleoprotein complex (GO:0030529) | ribosome (GO:0005840)	762.307	735.15	654.261	274.498	267.561	231.058	248.529	332.417
ENSOARG00000013860	.	ENSOARG00000013860	100302078	19:50686976-50696070:+1	protein-coding	.	GTPase activity (GO:0003924) | nucleotide binding (GO:0000166) | GTP binding (GO:0005525)	small GTPase mediated signal transduction (GO:0007264) | wound healing, spreading of cells (GO:0044319) | signal transduction (GO:0007165) | protein transport (GO:0015031) | skeletal muscle satellite cell migration (GO:1902766)	intracellular (GO:0005622) | membrane (GO:0016020)	597.801	760.565	588.639	230.927	266.952	269.838	193.808	98.499
ENSOARG00000018587	.	ENSOARG00000018587	.	13:59028799-59048797:+1	protein-coding	Peptidyl-prolyl cis-trans isomerase	isomerase activity (GO:0016853) | peptidyl-prolyl cis-trans isomerase activity (GO:0003755)	protein folding (GO:0006457) | protein peptidyl-prolyl isomerization (GO:0000413)	unknown	524.073	749.979	580.747	232.642	286.658	223.304	199.303	136.049
SERPINF1	AI195227 | Dmrs91 | EPC-1 | OI12 | OI6 | PEDF | PIG35 | Pedf | Pedfl | SERPINF2 | Sdf3 | zgc:92072	ENSOARG00000014232	100192425	11:22471286-22478665:+1	protein-coding	serpin family F member 1	protein binding (GO:0005515)	negative regulation of angiogenesis (GO:0016525) | positive regulation of neurogenesis (GO:0050769) | negative regulation of epithelial cell proliferation involved in prostate gland development (GO:0060770)	extracellular space (GO:0005615) | extracellular matrix (GO:0031012) | extracellular region (GO:0005576) | extracellular exosome (GO:0070062)	744.51	663.912	660.494	98.914	84.242	19.359	26.981	77.578
ENSOARG00000009152	.	ENSOARG00000009152	105613550	11:20719581-20721806:-1	protein-coding	.	GTPase activity (GO:0003924) | translation elongation factor activity (GO:0003746) | nucleotide binding (GO:0000166) | GTP binding (GO:0005525)	translational elongation (GO:0006414)	cytoplasm (GO:0005737)	744.244	653.704	564.268	115.369	138.694	98.658	61.577	87.429
TUBA4A	ALS22 | H2-ALPHA | M[a]4 | TUBA1 | Tuba4 | tuba1	ENSOARG00000020020	100302357	2:220175495-220179114:-1	protein-coding	Ovis aries tubulin, alpha 4a (TUBA4A), mRNA.	protein binding (GO:0005515) | GTPase activity (GO:0003924) | structural constituent of cytoskeleton (GO:0005200) | nucleotide binding (GO:0000166) | enzyme binding (GO:0019899) | GTP binding (GO:0005525)	metabolic process (GO:0008152) | protein polymerization (GO:0051258) | microtubule-based process (GO:0007017)	protein complex (GO:0043234) | cytoskeleton (GO:0005856) | cytoplasm (GO:0005737) | microtubule (GO:0005874) | extracellular exosome (GO:0070062)	6.944	8.212	60.296	233.666	215.291	298.333	284.315	743.078
PSAP	AI037048 | GLBA | SAP1 | SGP-1 | SGP1A | cb759 | wu:fa14a06 | wu:fb36e02 | wu:fb58g07	ENSOARG00000006957	100135695	25:27821576-27854699:-1	protein-coding	prosaposin	protein binding (GO:0005515) | G-protein coupled receptor binding (GO:0001664)	epithelial cell differentiation involved in prostate gland development (GO:0060742) | prostate gland growth (GO:0060736) | cellular response to organic substance (GO:0071310) | developmental growth (GO:0048589) | regulation of lipid metabolic process (GO:0019216) | lipid metabolic process (GO:0006629) | regulation of MAPK cascade (GO:0043408) | sphingolipid metabolic process (GO:0006665) | positi…	extracellular space (GO:0005615) | lysosome (GO:0005764) | mitochondrion (GO:0005739) | extracellular exosome (GO:0070062)	690.872	739.21	646.527	228.465	247.861	180.953	193.366	174.4
MPC1	0610006G08Rik | 3830411I18Rik | BR44L | BRP44L | Brp44l | CG14290 | CGI-129 | Dmel\CG14290 | FMP37 | GekBS206P | MPYCD | brp44l | brp44l-a | brp44l-b | brp44la | brp44lb | dJ68L15.3 | dMPC1 | zgc:92707	ENSOARG00000004872	.	8:87995562-87996759:-1	protein-coding	mitochondrial pyruvate carrier 1	pyruvate transmembrane transporter activity (GO:0050833)	mitochondrial acetyl-CoA biosynthetic process from pyruvate (GO:0061732) | mitochondrial pyruvate transmembrane transport (GO:1902361) | mitochondrial pyruvate transport (GO:0006850)	mitochondrion (GO:0005739) | mitochondrial inner membrane (GO:0005743)	161.874	188.941	241.4	463.207	466.298	553.789	737.553	689.251
MYOZ1	2310001N11Rik | AV090278 | CS-2 | FATZ | MYOZ | Myoz | Myozenin-1 | RGD1561064 | SYNPO2L | cs-2 | fatz | myoz | myozenin-1	ENSOARG00000007876	101119610	25:29494918-29500989:-1	protein-coding	myozenin 1	protein binding (GO:0005515) | FATZ binding (GO:0051373)	unknown	actin cytoskeleton (GO:0015629)	0.183	0.119	0.178	0.357	0.332	0.14	0.293	736.084
ENSOARG00000004556	.	ENSOARG00000004556	.	26:40551480-40553109:-1	protein-coding	.	structural constituent of ribosome (GO:0003735)	translation (GO:0006412)	intracellular (GO:0005622) | intracellular ribonucleoprotein complex (GO:0030529) | ribosome (GO:0005840)	674.413	731.784	640.379	299.464	322.557	413.378	312.992	647.855
ATP5F1	AT5F1 | Atpsyn-b | C76477 | GB14321 | PIG47 | wu:fb59g11 | wu:fj08b08 | zgc:101887	ENSOARG00000019607	101114570	1:88006497-88021863:+1	protein-coding	ATP synthase, H+ transporting, mitochondrial Fo complex subunit B1	protein binding (GO:0005515) | ATPase activity (GO:0016887) | hydrogen ion transmembrane transporter activity (GO:0015078)	substantia nigra development (GO:0021762) | ATP synthesis coupled proton transport (GO:0015986)	mitochondrial proton-transporting ATP synthase complex (GO:0005753) | nucleus (GO:0005634) | membrane (GO:0016020) | mitochondrion (GO:0005739) | nucleoplasm (GO:0005654) | extracellular exosome (GO:0070062) | mitochondrial proton-transporting ATP synthase complex, coupling factor F(o) (GO:0000276)	114.966	121.573	176.612	524.668	534.559	729.168	667.528	391.091
SFRP4	FRP-4 | FRPHE | sFRP-4	ENSOARG00000008899	101107858	4:49723506-49732978:-1	protein-coding	secreted frizzled related protein 4	Wnt-protein binding (GO:0017147) | protein binding (GO:0005515)	positive regulation of apoptotic process (GO:0043065) | negative regulation of sequence-specific DNA binding transcription factor activity (GO:0043433) | mitophagy in response to mitochondrial depolarization (GO:0098779) | phosphate ion homeostasis (GO:0055062) | negative regulation of canonical Wnt signaling pathway (GO:0090090) | positive regulation of canonical Wnt signaling pathway (GO:009026…	nucleus (GO:0005634) | extracellular space (GO:0005615) | cytoplasm (GO:0005737) | cell surface (GO:0009986) | extracellular region (GO:0005576)	646.211	709.157	728.783	3.567	7.683	4.112	0.556	72.302
CKMT2	2300008A19Rik | MIBCK | MiCK | Mib-CK | RSMTCK | S-MtCK | SMTCK | ScCKmit	ENSOARG00000015170	101122189	5:78568574-78593686:+1	protein-coding	creatine kinase, mitochondrial 2	ATP binding (GO:0005524) | transferase activity, transferring phosphorus-containing groups (GO:0016772) | transferase activity (GO:0016740) | kinase activity (GO:0016301) | nucleotide binding (GO:0000166) | catalytic activity (GO:0003824)	phosphorylation (GO:0016310)	mitochondrion (GO:0005739)	1.628	0.971	88.669	359.328	401.908	381.279	727.27	494.587
FSTL1	AI316791 | AW107808 | FLIK | FRP | FSL1 | Frp | Fstl | LRRC58 | MIR198 | TSC-36 | frp | fsl1 | fstl | occ1	ENSOARG00000019900	.	1:183430322-183449385:-1	protein-coding	follistatin like 1	protein binding (GO:0005515) | calcium ion binding (GO:0005509)	response to starvation (GO:0042594)	extracellular space (GO:0005615) | extracellular exosome (GO:0070062)	718.889	531.152	491.801	123.334	184.233	175.392	65.65	85.754
KLHL41	BBS5 | Gm112 | KBTBD10 | Kbtbd10 | Krp1 | SARCOSIN | Sarcosin | kbtbd10 | sarcosin	ENSOARG00000003388	101120303	2:138842626-138856360:-1	protein-coding	kelch like family member 41	protein binding (GO:0005515)	protein ubiquitination (GO:0016567) | regulation of myoblast differentiation (GO:0045661) | skeletal muscle cell differentiation (GO:0035914) | regulation of myoblast proliferation (GO:2000291) | myofibril assembly (GO:0030239) | sarcomere organization (GO:0045214) | regulation of skeletal muscle cell differentiation (GO:2001014) | skeletal muscle fiber development (GO:0048741)	sarcoplasmic reticulum membrane (GO:0033017) | nucleus (GO:0005634) | cytoskeleton (GO:0005856) | endoplasmic reticulum membrane (GO:0005789) | Cul3-RING ubiquitin ligase complex (GO:0031463) | cytoplasm (GO:0005737) | M band (GO:0031430) | plasma membrane (GO:0005886)	0.715	0.624	19.472	86.512	74.631	38.055	68.569	713.048
ENSOARG00000005397	.	ENSOARG00000005397	.	2:1893053-1898364:+1	protein-coding	Uncharacterized protein	structural constituent of ribosome (GO:0003735)	translation (GO:0006412)	intracellular (GO:0005622) | ribosome (GO:0005840)	710.836	705.641	658.598	254.338	259.277	327.789	251.092	397.961
HSP90AA1	86kDa | 89kDa | AL024080 | AL024147 | EL52 | HEL-S-65p | HSP86 | HSP89A | HSP90 | HSP90A | HSP90N | HSP90a | HSPC1 | HSPCA | HSPCAL1 | HSPCAL4 | HSPN | Hsp86 | Hsp86-1 | Hsp89 | Hsp90 | Hsp90a | Hspca | LAP-2 | LAP2 | hsp4	ENSOARG00000003903	100127209	18:65639631-65644368:-1	protein-coding	heat shock protein 90kDa alpha family class A member 1	protein binding (GO:0005515) | TPR domain binding (GO:0030911) | nitric-oxide synthase regulator activity (GO:0030235) | histone deacetylase binding (GO:0042826) | GTPase binding (GO:0051020) | identical protein binding (GO:0042802) | ATP binding (GO:0005524) | protein tyrosine kinase activity (GO:0004713) | protein homodimerization activity (GO:0042803) | poly(A) RNA binding (GO:0044822) | ATPas…	positive regulation of nitric oxide biosynthetic process (GO:0045429) | protein import into mitochondrial outer membrane (GO:0045040) | regulation of protein ubiquitination (GO:0031396) | response to stress (GO:0006950) | chaperone-mediated protein complex assembly (GO:0051131) | protein folding (GO:0006457)	ruffle membrane (GO:0032587) | membrane (GO:0016020) | extracellular exosome (GO:0070062) | myelin sheath (GO:0043209) | intracellular (GO:0005622) | nucleus (GO:0005634) | cytosol (GO:0005829) | cytoplasm (GO:0005737) | nucleoplasm (GO:0005654)	710.699	677.603	653.825	298.477	363.831	379.344	244.226	503.824
UQCRC2	1500004O06Rik | MC3DN5 | NOL11 | QCR2 | UQCR2	ENSOARG00000015094	101102527	24:19686502-19711770:+1	protein-coding	ubiquinol-cytochrome c reductase core protein II	protein binding (GO:0005515) | metal ion binding (GO:0046872) | metalloendopeptidase activity (GO:0004222) | catalytic activity (GO:0003824)	proteolysis (GO:0006508)	myelin sheath (GO:0043209) | nucleoplasm (GO:0005654) | mitochondrion (GO:0005739) | extracellular exosome (GO:0070062) | mitochondrial inner membrane (GO:0005743) | mitochondrial respiratory chain complex III (GO:0005750)	71.981	75.653	139.469	521.515	498.477	706.382	553.84	620.587
SERPINE2	B230326M24Rik | GDN | GDNPF | Gdnpn1 | PAI-1 | PI-7 | PI7 | PN-1 | PN1 | PNI | Pn-1 | SERPINE1 | Spi4 | Spin4 | gdn | pn-1 | pn1 | xpn-1 | zgc:55929	ENSOARG00000020413	101122004	2:225124178-225153645:-1	protein-coding	serpin family E member 2	protein binding (GO:0005515) | glycosaminoglycan binding (GO:0005539) | heparin binding (GO:0008201) | receptor binding (GO:0005102) | serine-type endopeptidase inhibitor activity (GO:0004867)	long-term synaptic potentiation (GO:0060291) | blood coagulation (GO:0007596) | innervation (GO:0060384) | cerebellar granular layer morphogenesis (GO:0021683) | negative regulation of peptidase activity (GO:0010466) | negative regulation of blood coagulation (GO:0030195) | positive regulation of astrocyte differentiation (GO:0048711) | negative regulation of cell proliferation (GO:0008285) | neg…	platelet alpha granule (GO:0031091) | extracellular space (GO:0005615) | extracellular matrix (GO:0031012) | extracellular vesicle (GO:1903561) | neuromuscular junction (GO:0031594) | extracellular region (GO:0005576) | extrinsic component of external side of plasma membrane (GO:0031232) | cytosol (GO:0005829)	705.366	561.611	199.907	18.803	30.747	8.976	8.452	8.046
FBLN1	FBLN | FIBL-1 | FIBL1 | Fibulin-1 | fbln1c | fbln1d | wu:fc52c06	ENSOARG00000019404	100037704	3:219920951-220010977:+1	protein-coding	fibulin 1	fibronectin binding (GO:0001968) | protein binding (GO:0005515) | protein complex binding (GO:0032403) | peptidase activator activity (GO:0016504) | protein C-terminus binding (GO:0008022) | extracellular matrix structural constituent (GO:0005201) | identical protein binding (GO:0042802) | calcium ion binding (GO:0005509) | fibrinogen binding (GO:0070051)	negative regulation of protein phosphorylation (GO:0001933) | extracellular matrix organization (GO:0030198) | blood coagulation, fibrin clot formation (GO:0072378) | negative regulation of ERK1 and ERK2 cascade (GO:0070373) | negative regulation of cell motility (GO:2000146) | negative regulation of substrate adhesion-dependent cell spreading (GO:1900025) | negative regulation of stem cell proli…	basement membrane (GO:0005604) | extracellular space (GO:0005615) | extracellular matrix (GO:0031012) | proteinaceous extracellular matrix (GO:0005578) | fibrinogen complex (GO:0005577) | extracellular exosome (GO:0070062) | extracellular region (GO:0005576) | elastic fiber (GO:0071953)	703.862	394.319	335.177	48.519	56.964	24.212	14.608	24.432
DSTN	2610043P17Rik | ACTDP | ADF | AU042046 | BS007 | BS007P | Destrin | Dsn | GekBS022P | HEL32 | actdp | adf | bA462D18.2 | ba462d18.2 | corn1 | destrin | sid23p	ENSOARG00000017589	.	13:37101751-37107532:+1	protein-coding	destrin, actin depolymerizing factor	actin binding (GO:0003779) | protein binding (GO:0005515)	actin filament severing (GO:0051014) | positive regulation of actin filament depolymerization (GO:0030836) | actin filament depolymerization (GO:0030042)	intracellular (GO:0005622) | actin cytoskeleton (GO:0015629) | cytoplasm (GO:0005737) | cortical actin cytoskeleton (GO:0030864) | extracellular exosome (GO:0070062)	642.005	701.726	516.585	365.309	386.022	390.096	255.347	38.972
ENSOARG00000004370	.	ENSOARG00000004370	101113347	11:42498733-42499925:+1	protein-coding	60S ribosomal protein L27	structural constituent of ribosome (GO:0003735)	translation (GO:0006412)	intracellular (GO:0005622) | intracellular ribonucleoprotein complex (GO:0030529) | ribosome (GO:0005840)	606.005	593.627	545.016	356.215	332.81	539.185	322.411	701.188
ATF4	ATF4-1 | ATF4A | Atf-4 | C/ATF | CREB-2 | CREB2 | Mgat3 | TAXREB67 | TXREB | atf-4 | creb-2 | creb2 | taxreb67 | txreb	ENSOARG00000016775	100216465	3:214930338-214931586:+1	protein-coding	activating transcription factor 4	transcriptional activator activity, RNA polymerase II core promoter proximal region sequence-specific binding (GO:0001077) | protein binding (GO:0005515) | core promoter sequence-specific DNA binding (GO:0001046) | RNA polymerase II core promoter proximal region sequence-specific DNA binding (GO:0000978) | leucine zipper domain binding (GO:0043522) | RNA polymerase II transcription factor activit…	positive regulation of neuron apoptotic process (GO:0043525) | regulation of transcription, DNA-templated (GO:0006355) | response to endoplasmic reticulum stress (GO:0034976) | circadian regulation of gene expression (GO:0032922) | mRNA transcription from RNA polymerase II promoter (GO:0042789) | positive regulation of transcription from RNA polymerase II promoter (GO:0045944) | cellular response…	transcription factor complex (GO:0005667) | neuron projection (GO:0043005) | ATF1-ATF4 transcription factor complex (GO:1990590) | Lewy body core (GO:1990037) | ATF4-CREB1 transcription factor complex (GO:1990589) | nuclear periphery (GO:0034399) | CHOP-ATF4 complex (GO:1990617) | nucleus (GO:0005634) | cytoplasm (GO:0005737)	250.134	350.067	254.585	157.627	181.382	248.775	179.371	699.823
CD81	CVID6 | S5.7 | TAPA1 | TSPAN28 | Tapa-1 | Tapa1 | Tspan28 | s5.7 | tapa1 | tspan28	ENSOARG00000003182	100147790	21:48425698-48433056:-1	protein-coding	Ovis aries CD81 molecule (CD81), mRNA.	protein binding (GO:0005515) | transferrin receptor binding (GO:1990459) | MHC class II protein complex binding (GO:0023026)	regulation of protein stability (GO:0031647) | positive regulation of protein catabolic process in the vacuole (GO:1904352) | receptor internalization (GO:0031623) | protein localization (GO:0008104) | positive regulation of B cell proliferation (GO:0030890) | positive regulation of transcription from RNA polymerase II promoter (GO:0045944) | regulation of cell motility (GO:2000145) | activation …	integral component of membrane (GO:0016021) | focal adhesion (GO:0005925) | immunological synapse (GO:0001772) | vesicle (GO:0031982) | membrane (GO:0016020) | integral component of plasma membrane (GO:0005887) | extracellular exosome (GO:0070062)	690.591	665.371	665.811	260.146	288.91	184.056	193.07	168.437
RBP1	ATRBP1 | CG17136 | CRABP-I | CRABP1 | CRBP | CRBP1 | CRBPI | Crbp | Dmel\CG17136 | F9K23.11 | F9K23_11 | NMNAT3 | RBP1 | RBPC | RNA-binding protein 1 | RRM1 | RRM11 | Rbp-1 | Rbp11 | Rbp1D | rbp1 | rbp1b | rrm1 | rrm11 | zgc:100825	ENSOARG00000006989	.	1:247591841-247618993:+1	protein-coding	retinol binding protein 1	lipid binding (GO:0008289) | transporter activity (GO:0005215)	regulation of granulocyte differentiation (GO:0030852) | transport (GO:0006810) | response to vitamin A (GO:0033189) | retinoic acid metabolic process (GO:0042573) | retinol metabolic process (GO:0042572)	unknown	421.727	690.34	650.289	62.653	102.771	28.449	36.408	19.094
ENSOARG00000006700	.	ENSOARG00000006700	.	11:54085290-54098581:+1	protein-coding	.	unknown	unknown	unknown	688.472	564.123	574.465	90.68	117.03	36.626	36.621	36.897
ENSOARG00000018884	.	ENSOARG00000018884	101119975	3:136887717-136929972:+1	protein-coding	tubulin, alpha 1b	GTPase activity (GO:0003924) | structural constituent of cytoskeleton (GO:0005200) | nucleotide binding (GO:0000166) | GTP binding (GO:0005525)	metabolic process (GO:0008152) | protein polymerization (GO:0051258) | microtubule-based process (GO:0007017)	protein complex (GO:0043234) | cytoskeleton (GO:0005856) | cytoplasm (GO:0005737) | microtubule (GO:0005874)	556.07	686.145	609.135	330.893	380.258	277.81	236.357	156.441
MRPS6	AW046321 | BcDNA:RH10862 | C21orf101 | CG15016 | Dmel\CG15016 | GB16964 | MRP-S6 | Mrps6 | RPMS6 | RT06 | S6mt | SLC5A3 | zgc:153390	ENSOARG00000012707	.	1:119605108-119622827:-1	protein-coding	mitochondrial ribosomal protein S6	protein binding (GO:0005515) | rRNA binding (GO:0019843) | structural constituent of ribosome (GO:0003735)	translation (GO:0006412)	ribosome (GO:0005840) | mitochondrion (GO:0005739)	78.416	51.788	154.558	549.398	394.836	378.181	684.542	135.448
IDH2	D2HGA2 | E430004F23 | F6P23.14 | F6P23_14 | GRMZM5G829778 | ICD-M | IDH | IDH-II | IDH1 | IDHM | IDHP | IDP | IDPM | IDPm | Idh-2 | NAD+ DEPENDENT ISOCITRATE DEHYDROGENASE SUBUNIT 2 | glu2 | isocitrate dehydrogenase II | isocitrate dehydrogenase subunit 2 | mNADP-IDH | wu:fb33c06 | wu:fk31e05 | wu:fq43b01 | zgc:55485	ENSOARG00000012014	101102843	18:20589314-20606110:-1	protein-coding	isocitrate dehydrogenase (NADP(+)) 2, mitochondrial	oxidoreductase activity, acting on the CH-OH group of donors, NAD or NADP as acceptor (GO:0016616) | metal ion binding (GO:0046872) | isocitrate dehydrogenase activity (GO:0004448) | magnesium ion binding (GO:0000287) | NAD binding (GO:0051287) | isocitrate dehydrogenase (NADP+) activity (GO:0004450) | oxidoreductase activity (GO:0016491)	isocitrate metabolic process (GO:0006102) | oxidation-reduction process (GO:0055114)	cytosol (GO:0005829) | peroxisome (GO:0005777) | mitochondrion (GO:0005739) | mitochondrial inner membrane (GO:0005743) | extracellular exosome (GO:0070062)	13.087	15.636	98.595	425.672	368.829	667.911	684.287	395.398
LMNA	CDCD1 | CDDC | CMD1A | CMT2B1 | Dhe | EMD2 | FPL | FPLD | FPLD2 | HGPS | IDC | LAM | LDP1 | LFP | LGMD1B | LMN1 | LMNC | LMNL1 | Lamin-A | Lamin-A/C | PRO1 | cb948 | cdcd1 | cddc | cmd1a | cmt2b1 | emd2 | fk66d12 | fpl | fpld | hgps | idc | lamin | lamin-L(III)-like | ldp1 | lfp | lgmd1b | lmn1 | lmna-A | lmnc | pro1 | wu:fk66d12	ENSOARG00000005489	.	1:104711158-104729637:+1	protein-coding	lamin A/C	structural molecule activity (GO:0005198) | protein binding (GO:0005515)	nuclear envelope organization (GO:0006998) | negative regulation of extrinsic apoptotic signaling pathway (GO:2001237) | regulation of cell migration (GO:0030334) | negative regulation of release of cytochrome c from mitochondria (GO:0090201) | ventricular cardiac muscle cell development (GO:0055015) | positive regulation of cell aging (GO:0090343) | sterol regulatory element binding protein impo…	intermediate filament (GO:0005882) | nuclear envelope (GO:0005635) | nucleus (GO:0005634) | cytoplasm (GO:0005737) | lamin filament (GO:0005638) | nucleoplasm (GO:0005654) | nuclear membrane (GO:0031965)	332.524	683.871	387.608	52.128	50.24	52.69	33.251	73.033
ENSOARG00000004412	.	ENSOARG00000004412	.	11:34495182-34495274:-1	protein-coding	Uncharacterized protein	unknown	unknown	unknown	558.832	617.683	581.579	397.534	354.233	597.406	394.531	683.053
C7orf73	.	ENSOARG00000009351	.	4:99249556-99251056:+1	protein-coding	chromosome 7 open reading frame 73	unknown	unknown	unknown	622.694	680.414	643.447	311.045	318.586	239.463	237.098	476.093
NEDD8	CG10679 | DDBDRAFT_0218116 | DDBDRAFT_0238041 | DDB_0218116 | DDB_0238041 | Dmel\CG10679 | GB17785 | NEDD-8 | NEDD8 | Rub1 | dNEDD8 | nedd8 | si:zc14a17.5 | ubiquitin	ENSOARG00000019164	101115212	7:20563997-20564961:+1	protein-coding	neural precursor cell expressed, developmentally down-regulated 8	protein binding (GO:0005515) | ubiquitin protein ligase binding (GO:0031625)	protein neddylation (GO:0045116) | regulation of transcription from RNA polymerase II promoter (GO:0006357) | protein localization (GO:0008104)	nucleus (GO:0005634) | extracellular exosome (GO:0070062)	679.792	668.806	655.082	381.657	375.936	264.24	388.965	323.221
SUCLG1	1500000I01Rik | GALPHA | MTDPS9 | SCS | SCS-alpha | SUCLA1 | Sucla1 | galpha | mtdps9 | sucla1 | zgc:103729 | zgc:92738	ENSOARG00000020397	101122512	3:56150389-56177606:-1	protein-coding	succinate-CoA ligase alpha subunit	ATP citrate synthase activity (GO:0003878) | succinate-CoA ligase (ADP-forming) activity (GO:0004775) | cofactor binding (GO:0048037) | poly(A) RNA binding (GO:0044822) | ligase activity (GO:0016874) | catalytic activity (GO:0003824)	metabolic process (GO:0008152)	cytoplasm (GO:0005737) | plasma membrane (GO:0005886) | mitochondrion (GO:0005739) | extracellular exosome (GO:0070062) | mitochondrial inner membrane (GO:0005743)	79.929	76.814	139.753	410.287	406.825	674.154	530.31	391.206
PTGS2	CEF147 | COX-2 | COX2 | Cox-2 | Cox2 | GRIPGHS | PES-2 | PGG/HS | PGH2S | PGHS-2 | PGHS2 | PHS II | PHS-2 | PHSII | Pghs2 | TIS10 | cox-2 | cox2 | gripghs | hCox-2 | hcox-2 | pgg/hs | pghs-2 | phs-2	ENSOARG00000007592	443460	12:65834369-65841232:-1	protein-coding	prostaglandin-endoperoxide synthase 2	peroxidase activity (GO:0004601) | prostaglandin-endoperoxide synthase activity (GO:0004666) | heme binding (GO:0020037) | protein binding (GO:0005515) | protein homodimerization activity (GO:0042803) | enzyme binding (GO:0019899)	embryo implantation (GO:0007566) | inflammatory response (GO:0006954) | prostaglandin biosynthetic process (GO:0001516) | regulation of cell proliferation (GO:0042127) | positive regulation of brown fat cell differentiation (GO:0090336) | brown fat cell differentiation (GO:0050873) | cellular response to fluid shear stress (GO:0071498) | cyclooxygenase pathway (GO:0019371) | cellular response to …	neuron projection (GO:0043005) | cytoplasm (GO:0005737) | endoplasmic reticulum (GO:0005783)	294.313	673.899	576.074	30.389	33.422	1.786	0.693	1.863
CYC1	2610002H19Rik | AA408921 | CYC1b | Cyct1 | DDBDRAFT_0184465 | DDBDRAFT_0238603 | DDB_0184465 | DDB_0238603 | GB12510 | GRMZM2G034647 | MC3DN6 | UQCR4 | csh9 | fb80h03 | im:6911272 | sr:nyz104 | wu:fb80h03 | zgc:123089	ENSOARG00000015048	101113599	9:13690819-13692852:-1	protein-coding	cytochrome c1	protein binding (GO:0005515) | heme binding (GO:0020037) | electron carrier activity (GO:0009055)	unknown	nucleus (GO:0005634) | membrane (GO:0016020) | mitochondrion (GO:0005739) | mitochondrial inner membrane (GO:0005743)	69.503	76.616	154.952	516.531	465.085	672.971	626.506	521.648
C11orf96	.	ENSOARG00000010748	.	15:72228570-72228791:+1	protein-coding	chromosome 11 open reading frame 96	unknown	unknown	unknown	671.873	661.615	653.3	93.24	137.96	50.188	39.344	61.338
RAMP2	RAMP1 | zgc:174936	ENSOARG00000003452	101105172	11:42288243-42289793:+1	protein-coding	receptor activity modifying protein 2	protein binding (GO:0005515) | protein transporter activity (GO:0008565) | coreceptor activity (GO:0015026)	positive regulation of angiogenesis (GO:0045766) | receptor internalization (GO:0031623) | sprouting angiogenesis (GO:0002040) | adherens junction assembly (GO:0034333) | negative regulation of endothelial cell apoptotic process (GO:2000352) | positive regulation of vasculogenesis (GO:2001214) | calcium ion transport (GO:0006816) | regulation of G-protein coupled receptor protein signaling pathwa…	integral component of membrane (GO:0016021) | receptor complex (GO:0043235) | cytoplasm (GO:0005737) | cell surface (GO:0009986) | plasma membrane (GO:0005886)	330.925	670.179	482.721	87.361	124.763	92.661	70.277	76.136
ENSOARG00000012079	.	ENSOARG00000012079	.	3:8633742-8637580:+1	protein-coding	Uncharacterized protein	structural constituent of ribosome (GO:0003735)	translation (GO:0006412)	intracellular ribonucleoprotein complex (GO:0030529) | ribosome (GO:0005840)	666.789	563.91	555.067	227.38	215.403	334.264	219.801	508.942
MMP2	2-MMP | CG1794 | CLG4 | CLG4A | Clg4a | Dm2-MMP | Dmel\CG1794 | GelA | MMP-2 | MMP-II | MMP2 | MMP9 | MONA | TBE-1 | anon-WO0118547.84 | clg4 | clg4a | dm-2MMP | dmmp2 | fgmmp-2 | gel-a | l(2)02353 | mmp-2 | mmp-ii | mmp2 | mona | tbe-1 | wu:fa99h12 | wu:fk89d01	ENSOARG00000018035	443115	14:23241326-23267541:+1	protein-coding	72 kDa type IV collagenase precursor	protein binding (GO:0005515) | metal ion binding (GO:0046872) | hydrolase activity (GO:0016787) | serine-type endopeptidase activity (GO:0004252) | peptidase activity (GO:0008233) | metalloendopeptidase activity (GO:0004222) | zinc ion binding (GO:0008270) | metallopeptidase activity (GO:0008237)	embryo implantation (GO:0007566) | collagen catabolic process (GO:0030574) | positive regulation of innate immune response (GO:0045089) | proteolysis (GO:0006508) | endodermal cell differentiation (GO:0035987) | response to hypoxia (GO:0001666) | cellular response to amino acid stimulus (GO:0071230) | skeletal system morphogenesis (GO:0048705) | bone trabecula formation (GO:0060346) | blood vesse…	extracellular space (GO:0005615) | extracellular matrix (GO:0031012) | cytoplasm (GO:0005737) | plasma membrane (GO:0005886) | mitochondrion (GO:0005739) | sarcomere (GO:0030017)	665.207	532.526	543.05	92.634	119.701	91.029	51.916	70.554
BTG1	AI426953 | AW546738 | btg-a | sb:cb1010 | wu:fb14h05 | wu:fb40c11 | wu:fk92d10 | xbtg1 | zgc:65815	ENSOARG00000016760	.	3:128382099-128382467:-1	protein-coding	B-cell translocation gene 1, anti-proliferative	protein binding (GO:0005515) | enzyme binding (GO:0019899)	positive regulation of angiogenesis (GO:0045766) | positive regulation of fibroblast apoptotic process (GO:2000271) | positive regulation of endothelial cell differentiation (GO:0045603) | negative regulation of cell proliferation (GO:0008285) | positive regulation of myoblast differentiation (GO:0045663)	nucleus (GO:0005634) | cytoplasm (GO:0005737)	487.241	498.009	663.79	170.943	199.019	142.699	110.952	123.217
LAPTM4A	AA286466 | HUMORF13 | LAPTM4 | MBNT | MTP | Mtrp | laptm4 | mKIAA0108 | mbnt | mtrp | wu:fb57c07 | wu:fj99e08	ENSOARG00000017115	101103549	3:27772505-27789336:-1	protein-coding	lysosomal protein transmembrane 4 alpha	unknown	unknown	integral component of membrane (GO:0016021) | Golgi apparatus (GO:0005794)	662.303	616.581	583.507	431.735	432.345	335.973	278.257	133.13
TMEM100	1810057C19Rik | AV011897	ENSOARG00000013740	101118965	11:5734840-5735250:-1	protein-coding	transmembrane protein 100	protein binding (GO:0005515)	protein kinase B signaling (GO:0043491) | positive regulation of endothelial cell differentiation (GO:0045603) | cellular response to BMP stimulus (GO:0071773) | BMP signaling pathway (GO:0030509) | endocardial cushion development (GO:0003197) | positive regulation of vasculogenesis (GO:2001214) | arterial endothelial cell differentiation (GO:0060842) | epithelial to mesenchymal transition involv…	perikaryon (GO:0043204) | plasma membrane (GO:0005886) | endoplasmic reticulum (GO:0005783) | perinuclear region of cytoplasm (GO:0048471)	538.523	597.224	657.895	74.374	113.329	39.841	24.712	17.66
CLEC3B	TN | TNA | Tna	ENSOARG00000011122	101120024	19:54058404-54064238:-1	protein-coding	C-type lectin domain family 3 member B	calcium ion binding (GO:0005509) | heparin binding (GO:0008201) | kringle domain binding (GO:0036143)	bone mineralization (GO:0030282) | cellular response to transforming growth factor beta stimulus (GO:0071560) | ossification (GO:0001503) | cellular response to organic substance (GO:0071310)	extracellular space (GO:0005615) | granular component (GO:0001652) | cytoplasm (GO:0005737) | extracellular exosome (GO:0070062)	581.622	636.082	657.493	174.631	253.969	164.736	142.532	108.426
VNN2 (assigned to ENSOARG00000003386)	.	ENSOARG00000003386	101118850	26:35728802-35737811:+1	protein-coding	vanin 2	voltage-gated anion channel activity (GO:0008308)	regulation of anion transport (GO:0044070) | anion transport (GO:0006820) | regulation of anion transmembrane transport (GO:1903959) | regulation of cilium assembly (GO:1902017) | transmembrane transport (GO:0055085)	mitochondrial outer membrane (GO:0005741) | mitochondrion (GO:0005739)	95.995	96.395	128.28	275.623	293.436	238.653	276.549	656.425
IGFBP5	AI256729 | AW208790 | IBP-5 | IBP5 | IGF-BP5 | IGFBP-5 | IGFBP-5P | ibp5 | xIGFBP-5	ENSOARG00000019421	443133	2:217650010-217669182:-1	protein-coding	insulin like growth factor binding protein 5	fibronectin binding (GO:0001968) | protein binding (GO:0005515) | insulin-like growth factor I binding (GO:0031994) | insulin-like growth factor binding (GO:0005520)	negative regulation of skeletal muscle hypertrophy (GO:1904205) | negative regulation of growth (GO:0045926) | response to growth hormone (GO:0060416) | osteoblast differentiation (GO:0001649) | regulation of glucose metabolic process (GO:0010906) | striated muscle cell differentiation (GO:0051146) | negative regulation of translation (GO:0017148) | negative regulation of smooth muscle cell proli…	insulin-like growth factor ternary complex (GO:0042567) | extracellular region (GO:0005576)	489.368	654.806	620.872	248.702	326.757	97.859	74.114	88.67
ACTN2	1110008F24Rik | ACTN1 | CMD1AA | CMH23	ENSOARG00000003713	101116372	25:9356575-9438266:+1	protein-coding	actinin alpha 2	ligand-dependent nuclear receptor transcription coactivator activity (GO:0030374) | thyroid hormone receptor coactivator activity (GO:0030375) | FATZ binding (GO:0051373) | phosphatidylinositol-4,5-bisphosphate binding (GO:0005546) | identical protein binding (GO:0042802) | titin Z domain binding (GO:0070080) | calcium ion binding (GO:0005509) | ion channel binding (GO:0044325) | protein dimeriza…	phospholipase C-activating angiotensin-activated signaling pathway (GO:0086097) | cardiac muscle cell development (GO:0055013) | positive regulation of potassium ion transport (GO:0043268) | negative regulation of potassium ion transport (GO:0043267) | microspike assembly (GO:0030035) | focal adhesion assembly (GO:0048041) | negative regulation of potassium ion transmembrane transporter activity …	filopodium (GO:0030175) | focal adhesion (GO:0005925) | plasma membrane (GO:0005886) | extracellular exosome (GO:0070062) | Z disc (GO:0030018) | sarcomere (GO:0030017)	2.482	0.821	109.286	641.864	632.767	386.041	654.168	582.94
COX14	2310016M24Rik | AA959804 | C12orf62 | C27H12orf62 | C5H12orf62 | si:dkey-222f2.8	ENSOARG00000016862	101119459	3:136027278-136027451:-1	protein-coding	COX14 cytochrome c oxidase assembly factor	unknown	mitochondrial respiratory chain complex IV assembly (GO:0033617)	mitochondrion (GO:0005739)	222.392	218.276	253.553	331.763	311.026	389.104	377.851	645.498
NDUFB2	1810011O01Rik | 8kDa | AGGG | AI325567 | CI-AGGG | GB16200 | NV15 | wu:fb78c03 | zgc:73329	ENSOARG00000013450	101107189	4:103790997-103795700:+1	protein-coding	NADH:ubiquinone oxidoreductase subunit B2	unknown	unknown	mitochondrial respiratory chain complex I (GO:0005747) | mitochondrion (GO:0005739) | mitochondrial inner membrane (GO:0005743)	229.63	238.617	288.509	426.22	432.147	450.161	643.725	301.212
PTN	HARP | HB-GAM | HBBM | HBBN | HBGF-8 | HBGF8 | HBNF | HBNF-1 | Hbnf | NEGF1 | OSF | OSF-1 | Osf-1 | Osf1 | PTF-BETA | PTN-A | X-PTF | harp | hbgf8 | hbnf | negf1 | zHBNF | zgc:111787	ENSOARG00000009728	101103149	4:100677303-100682081:-1	protein-coding	pleiotrophin	growth factor activity (GO:0008083)	learning (GO:0007612) | bone mineralization (GO:0030282) | ossification (GO:0001503)	endoplasmic reticulum (GO:0005783)	581.731	461.208	643.361	33.588	42.486	25.985	36.583	10.544
ENSOARG00000019367	.	ENSOARG00000019367	.	3:19139797-19139898:-1	protein-coding	Uncharacterized protein	unknown	unknown	unknown	641.458	612.413	535.533	75.285	91.236	48.292	35.694	58.907
ENSOARG00000016941	.	ENSOARG00000016941	.	3:137088309-137088467:+1	protein-coding	Uncharacterized protein	nucleotide binding (GO:0000166) | GTP binding (GO:0005525)	unknown	unknown	488.815	641.042	549.375	132.279	144.779	85.933	89.082	56.47
ATP2A1	ATP2A | ATP2A2 | ATP2A3 | SERCA1 | SERCA1a | Serca1 | atp2a | atp2a2 | atp2b | ca-p60a | cb279 | dar | serca | serca1 | serca2 | wu:cegs655 | wu:fb17h11 | wu:fb19b10 | zgc:92110	ENSOARG00000002132	101111766	24:25931953-25950361:-1	protein-coding	ATPase sarcoplasmic/endoplasmic reticulum Ca2+ transporting 1	ATP binding (GO:0005524) | protein binding (GO:0005515) | calcium ion binding (GO:0005509) | protein homodimerization activity (GO:0042803) | metal ion binding (GO:0046872) | hydrolase activity (GO:0016787) | calcium-transporting ATPase activity (GO:0005388) | nucleotide binding (GO:0000166)	transport (GO:0006810) | response to endoplasmic reticulum stress (GO:0034976) | negative regulation of endoplasmic reticulum calcium ion concentration (GO:0032471) | ion transport (GO:0006811) | calcium ion transport (GO:0006816) | metabolic process (GO:0008152) | calcium ion import (GO:0070509) | intrinsic apoptotic signaling pathway in response to endoplasmic reticulum stress (GO:0070059) | ca…	integral component of membrane (GO:0016021) | sarcoplasmic reticulum membrane (GO:0033017) | membrane (GO:0016020) | endoplasmic reticulum (GO:0005783) | sarcoplasmic reticulum (GO:0016529)	1.85	1.972	2.098	1.137	1.593	0.259	1.296	639.168
NDUFB3	2700033I16Rik | B12 | CI-B12 | ndub3 | si:dkeyp-118h9.4	ENSOARG00000016831	101106662	2:202337476-202340818:+1	protein-coding	NADH:ubiquinone oxidoreductase subunit B3	unknown	electron transport chain (GO:0022900)	mitochondrial respiratory chain complex I (GO:0005747) | mitochondrion (GO:0005739) | mitochondrial inner membrane (GO:0005743) | extracellular exosome (GO:0070062)	180.908	211.959	250.359	460.294	449.922	413.159	629.98	480.776
VDAC2	ARABIDOPSIS THALIANA VOLTAGE DEPENDENT ANION CHANNEL 2 | ATVDAC2 | GRMZM2G115049 | K9I9.6 | K9I9_6 | POR | VDAC-2 | Vdac6 | mVDAC2 | mVDAC6 | voltage dependent anion channel 2 | wu:fa01a08 | wu:fa98a10 | wu:fb50g11 | zgc:55795 | zgc:77621	ENSOARG00000008758	101103533	25:30845597-30859494:+1	protein-coding	voltage dependent anion channel 2	voltage-gated anion channel activity (GO:0008308) | protein binding (GO:0005515)	regulation of anion transport (GO:0044070) | negative regulation of protein polymerization (GO:0032272) | anion transport (GO:0006820) | regulation of anion transmembrane transport (GO:1903959) | negative regulation of intrinsic apoptotic signaling pathway (GO:2001243) | transmembrane transport (GO:0055085)	integral component of membrane (GO:0016021) | mitochondrial nucleoid (GO:0042645) | mitochondrial inner membrane (GO:0005743) | extracellular exosome (GO:0070062) | myelin sheath (GO:0043209) | nucleus (GO:0005634) | mitochondrial outer membrane (GO:0005741) | mitochondrion (GO:0005739)	123.656	134.096	172.771	398.347	417.409	616.953	477.409	475.954
RNASEK	2310033H11Rik | AA571397 | BcDNA:GM16138 | CG40127 | D11Bwg0434e | Dmel\CG40127 | GM16138 | NC110 | RGD1305687 | anon-EST:Posey156 | dRNASEK | l(2)NC110	ENSOARG00000009470	101113944	11:26427862-26429422:+1	protein-coding	ribonuclease K	endoribonuclease activity (GO:0004521)	RNA phosphodiester bond hydrolysis, endonucleolytic (GO:0090502) | rRNA transcription (GO:0009303)	unknown	453.165	612.21	474.845	239.291	250.306	181.266	237.645	143.492
ENSOARG00000013789	.	ENSOARG00000013789	101117734	X:54237546-54239651:+1	protein-coding	Uncharacterized protein	unknown	unknown	unknown	243.812	258.307	329.926	521.821	477.466	590.282	609.196	519.664
RPS26/ENSOARG:12105	.	ENSOARG00000012105	.	2:52875396-52876084:+1	protein-coding	ribosomal protein S26	protein binding (GO:0005515) | mRNA binding (GO:0003729) | poly(A) RNA binding (GO:0044822) | structural constituent of ribosome (GO:0003735)	negative regulation of RNA splicing (GO:0033119) | translation (GO:0006412)	nucleolus (GO:0005730) | membrane (GO:0016020) | ribosome (GO:0005840) | extracellular exosome (GO:0070062) | intracellular (GO:0005622) | small ribosomal subunit (GO:0015935) | cytoplasm (GO:0005737) | cytosolic small ribosomal subunit (GO:0022627)	606.355	570.84	490.307	250.457	239.773	373.354	192.048	321.295
DAD1	AI323713 | DAD-1 | DEFECTIVE ANTHER DEHISCENCE 1 | F16B22.45 | OST2 | dad-1 | ost2 | si:ch211-9d9.5	ENSOARG00000019440	101106014	7:21835695-21847699:+1	protein-coding	defender against cell death 1	transferase activity (GO:0016740) | dolichyl-diphosphooligosaccharide-protein glycotransferase activity (GO:0004579)	blastocyst development (GO:0001824) | negative regulation of apoptotic process (GO:0043066) | protein glycosylation (GO:0006486)	integral component of membrane (GO:0016021) | endoplasmic reticulum membrane (GO:0005789) | membrane (GO:0016020) | endoplasmic reticulum (GO:0005783) | extracellular exosome (GO:0070062) | oligosaccharyltransferase complex (GO:0008250)	461.023	604.165	473.387	314.137	364.399	299.873	326.302	259.646
ENSOARG00000004460	.	ENSOARG00000004460	101119296	13:20917637-20918029:+1	protein-coding	Uncharacterized protein	structural constituent of ribosome (GO:0003735)	translation (GO:0006412)	intracellular ribonucleoprotein complex (GO:0030529) | ribosome (GO:0005840)	594.154	592.297	526.643	191.459	200.591	210.121	168.793	294.641
ENSOARG00000015615	.	ENSOARG00000015615	101119296	21:32201446-32201838:-1	protein-coding	Uncharacterized protein	structural constituent of ribosome (GO:0003735)	translation (GO:0006412)	intracellular ribonucleoprotein complex (GO:0030529) | ribosome (GO:0005840)	594.154	592.297	526.643	191.459	200.591	210.121	168.793	294.641
ENSOARG00000018407	.	ENSOARG00000018407	101119296	3:165532313-165532705:-1	protein-coding	.	structural constituent of ribosome (GO:0003735)	translation (GO:0006412)	intracellular ribonucleoprotein complex (GO:0030529) | ribosome (GO:0005840) | mitochondrion (GO:0005739)	594.154	592.297	526.643	191.459	200.591	210.121	168.793	294.641
ENSOARG00000018456	.	ENSOARG00000018456	101119296	3:175055192-175055584:-1	protein-coding	Uncharacterized protein	structural constituent of ribosome (GO:0003735)	translation (GO:0006412)	intracellular ribonucleoprotein complex (GO:0030529) | ribosome (GO:0005840)	594.154	592.297	526.643	191.459	200.591	210.121	168.793	294.641
RPS15A	A630031B11Rik | CYTOPLASMIC RIBOSOMAL PROTEIN S15A | DDBDRAFT_0167031 | DDBDRAFT_0185069 | DDB_0167031 | DDB_0185069 | F24B9.12 | F24B9_12 | RS15A | S15a | SpS24 | ribosomal protein S15A | wu:fb04b07	ENSOARG00000010484	101119296	24:16387268-16391608:-1	protein-coding	Uncharacterized protein	protein binding (GO:0005515) | poly(A) RNA binding (GO:0044822) | structural constituent of ribosome (GO:0003735)	translation (GO:0006412) | positive regulation of cell proliferation (GO:0008284) | positive regulation of cell cycle (GO:0045787) | response to virus (GO:0009615)	intracellular ribonucleoprotein complex (GO:0030529) | cytoplasm (GO:0005737) | membrane (GO:0016020) | ribosome (GO:0005840) | extracellular exosome (GO:0070062) | cytosolic small ribosomal subunit (GO:0022627)	594.154	592.297	526.643	191.459	200.591	210.121	168.793	294.641
UQCRC1	1110032G10Rik | D3S3191 | QCR1 | UQCR1 | zgc:73404 | zgc:85750	ENSOARG00000016718	101110095	19:51217881-51226160:+1	protein-coding	ubiquinol-cytochrome c reductase core protein I	protein binding (GO:0005515) | ubiquitin protein ligase binding (GO:0031625) | metal ion binding (GO:0046872) | catalytic activity (GO:0003824)	mitochondrial electron transport, ubiquinol to cytochrome c (GO:0006122)	myelin sheath (GO:0043209) | mitochondrion (GO:0005739) | mitochondrial inner membrane (GO:0005743)	43.58	47.983	104.117	415.443	392.967	592.811	517.802	337.227
TNNT1	ANM | AW146156 | Fang2 | NEM5 | STNT | TNT | TNTS | Tnnt | Tnt | cb328 | sTnT | sb:cb328 | ssTnT | stnt | tnTs | zgc:86847	ENSOARG00000001823	.	14:59548305-59556856:+1	protein-coding	troponin T1, slow skeletal type	protein binding (GO:0005515) | tropomyosin binding (GO:0005523)	transition between fast and slow fiber (GO:0014883) | regulation of muscle contraction (GO:0006937) | skeletal muscle contraction (GO:0003009) | negative regulation of muscle contraction (GO:0045932)	troponin complex (GO:0005861)	2.878	1.579	12.037	3.779	3.823	1.393	10.228	592.113
PCOLCE2	2400001O18Rik | PCOC2 | PCPE2 | Pcpe2	ENSOARG00000005926	101104952	1:244192902-244276222:+1	protein-coding	procollagen C-endopeptidase enhancer 2	protein binding (GO:0005515) | peptidase activator activity (GO:0016504) | heparin binding (GO:0008201) | collagen binding (GO:0005518)	unknown	extracellular exosome (GO:0070062) | extracellular region (GO:0005576)	591.448	142.51	131.139	45.981	93.168	44.82	23.605	32.016
NDUFB10	0610011B04Rik | 22kDa | NDUBA | PDSW | zgc:73147 | zgc:86843	ENSOARG00000016876	.	24:1503091-1505967:+1	protein-coding	NADH:ubiquinone oxidoreductase subunit B10	protein binding (GO:0005515)	unknown	mitochondrial respiratory chain complex I (GO:0005747) | mitochondrion (GO:0005739) | extracellular exosome (GO:0070062) | mitochondrial inner membrane (GO:0005743)	104.8	106.217	174.898	517.66	478.887	565.137	591.062	445.513
NDUFA2	AV000592 | B8 | C1-B8 | CD14 | CI-B8 | CIB8 | NDUA2 | b8 | cd14 | cib8 | zgc:112340	ENSOARG00000018374	101119470	5:49164184-49166046:-1	protein-coding	NADH:ubiquinone oxidoreductase subunit A2	unknown	oxidation-reduction process (GO:0055114)	mitochondrial membrane (GO:0031966) | respiratory chain (GO:0070469) | mitochondrial respiratory chain complex I (GO:0005747) | membrane (GO:0016020) | mitochondrion (GO:0005739) | mitochondrial inner membrane (GO:0005743)	208.905	213.404	274.911	480.997	414.566	439.051	590.272	433.009
PHPT1 (assigned to ENSOARG00000004142)	.	ENSOARG00000004142	.	JH922135.1:55-750:+1	protein-coding	phosphohistidine phosphatase 1	calcium channel inhibitor activity (GO:0019855) | phosphohistidine phosphatase activity (GO:0008969) | ion channel binding (GO:0044325)	negative regulation of lyase activity (GO:0051350) | negative regulation of ATP citrate synthase activity (GO:2000984) | negative regulation of T cell receptor signaling pathway (GO:0050860) | positive regulation of cell motility (GO:2000147) | protein dephosphorylation (GO:0006470) | regulation of actin cytoskeleton reorganization (GO:2000249) | peptidyl-histidine dephosphorylation (GO:0035971)	cytosol (GO:0005829) | extracellular exosome (GO:0070062)	262.493	268.16	335.919	468.977	419.767	444.995	589.203	559.693
APOE	AD2 | AI255918 | APO-E | APOEA | Apo-E | LDLCQ5 | LPG | ad2 | apo-e | apoprotein | ldlcq5 | lpg	ENSOARG00000009438	.	14:51709732-51711208:+1	protein-coding	apolipoprotein E	antioxidant activity (GO:0016209) | lipoprotein particle binding (GO:0071813) | lipid transporter activity (GO:0005319) | identical protein binding (GO:0042802) | lipid binding (GO:0008289) | very-low-density lipoprotein particle receptor binding (GO:0070326) | beta-amyloid binding (GO:0001540) | phospholipid binding (GO:0005543) | heparin binding (GO:0008201) | cholesterol transporter activity (…	high-density lipoprotein particle assembly (GO:0034380) | high-density lipoprotein particle clearance (GO:0034384) | reverse cholesterol transport (GO:0043691) | triglyceride metabolic process (GO:0006641) | vasodilation (GO:0042311) | cellular calcium ion homeostasis (GO:0006874) | lipid metabolic process (GO:0006629) | long-chain fatty acid transport (GO:0015909) | high-density lipoprotein part…	chylomicron (GO:0042627) | Golgi apparatus (GO:0005794) | extracellular space (GO:0005615) | extracellular matrix (GO:0031012) | membrane (GO:0016020) | endoplasmic reticulum (GO:0005783) | extracellular vesicle (GO:1903561) | high-density lipoprotein particle (GO:0034364) | extracellular exosome (GO:0070062) | low-density lipoprotein particle (GO:0034362) | extracellular region (GO:0005576) | in…	435.315	588.279	405.016	35.636	41.714	5.756	14.148	10.525
NDUFB9	1190008J14Rik | B22 | CI-B22 | LYRM3 | NDUB9 | UQOR22 | wu:fb10b03 | zgc:110657	ENSOARG00000008825	101106179	9:28424418-28431883:-1	protein-coding	NADH:ubiquinone oxidoreductase subunit B9	protein binding (GO:0005515)	mitophagy in response to mitochondrial depolarization (GO:0098779)	mitochondrial respiratory chain complex I (GO:0005747) | mitochondrion (GO:0005739) | extracellular exosome (GO:0070062) | mitochondrial inner membrane (GO:0005743)	87.433	98.131	154.139	431.262	408.744	484.263	587.713	320.288
DKK3	AW061014 | C87148 | GekBS205P | REIC | REIC/Dkk-3 | RIG | Reic | dkk-3 | p29 | reic	ENSOARG00000009341	101122131	15:40284779-40334453:+1	protein-coding	dickkopf WNT signaling pathway inhibitor 3	unknown	negative regulation of cortisol biosynthetic process (GO:2000065) | adrenal gland development (GO:0030325) | negative regulation of canonical Wnt signaling pathway (GO:0090090) | negative regulation of aldosterone biosynthetic process (GO:0032348) | multicellular organism development (GO:0007275) | negative regulation of Wnt signaling pathway (GO:0030178) | negative regulation of transcription, D…	extracellular region (GO:0005576)	100.827	39.791	71.27	586.759	560.391	51.047	63.829	3.001
PDIA3	25D3-membrane-associated | 58kDa | ER60 | ERp57 | ERp60 | ERp61 | Erp | Erp57 | GRP57 | GRP58 | Grp58 | HEL-S-269 | HEL-S-93n | HsT17083 | P58 | PDI | PDI-Q2 | PI-PLC | PLC[a] | Plca | erp57 | grp-58 | grp58 | sb:cb825	ENSOARG00000010912	.	18:54338798-54352776:+1	protein-coding	protein disulfide isomerase family A member 3	protein binding (GO:0005515) | protein disulfide isomerase activity (GO:0003756) | isomerase activity (GO:0016853) | poly(A) RNA binding (GO:0044822)	metabolic process (GO:0008152) | positive regulation of extrinsic apoptotic signaling pathway (GO:2001238) | protein folding (GO:0006457) | cell redox homeostasis (GO:0045454)	myelin sheath (GO:0043209) | nucleus (GO:0005634) | focal adhesion (GO:0005925) | cell surface (GO:0009986) | endoplasmic reticulum (GO:0005783) | extracellular exosome (GO:0070062)	548.852	585.749	445.652	163.497	191.962	184.494	116.975	111.437
COX6A1	CMTRID | COX6A | COX6AL | GB10253 | VIA L | VIaL | cox6a | cox6al | ns:zf-e250 | zgc:103782	ENSOARG00000012290	101117965	17:62376933-62378639:+1	protein-coding	cytochrome c oxidase subunit 6A1	cytochrome-c oxidase activity (GO:0004129)	hydrogen ion transmembrane transport (GO:1902600)	membrane (GO:0016020) | mitochondrion (GO:0005739) | mitochondrial inner membrane (GO:0005743) | mitochondrial respiratory chain complex IV (GO:0005751)	561.205	584.602	471.416	141.449	169.388	114.955	107.136	89.683
ENSOARG00000000079	.	ENSOARG00000000079	.	JH924719.1:555-614:+1	protein-coding	Uncharacterized protein	GTPase activity (GO:0003924) | nucleotide binding (GO:0000166) | GTP binding (GO:0005525)	metabolic process (GO:0008152) | microtubule-based process (GO:0007017)	microtubule (GO:0005874)	583.853	507.876	390.948	70.803	121.875	45.918	49.128	70.017
CS	2610511A05Rik | 9030605P22Rik | Ahl4 | BB234005 | CNPY2 | Cis | wu:fb58e04 | zgc:55507	ENSOARG00000009418	101109163	3:162970617-162991754:+1	protein-coding	citrate synthase	transferase activity (GO:0016740) | transferase activity, transferring acyl groups, acyl groups converted into alkyl on transfer (GO:0046912) | citrate (Si)-synthase activity (GO:0004108) | poly(A) RNA binding (GO:0044822)	carbohydrate metabolic process (GO:0005975) | tricarboxylic acid cycle (GO:0006099) | cellular carbohydrate metabolic process (GO:0044262)	nucleus (GO:0005634) | mitochondrion (GO:0005739) | extracellular exosome (GO:0070062) | mitochondrial matrix (GO:0005759)	42.912	55.419	91.832	295.903	327.532	583.235	351.749	280.828
PKIA/ENSOARG:07520 (assigned to ENSOARG00000007520)	.	ENSOARG00000007520	101110769	9:54692932-54697673:+1	protein-coding	protein kinase (cAMP-dependent, catalytic) inhibitor alpha	cAMP-dependent protein kinase inhibitor activity (GO:0004862)	negative regulation of protein kinase activity (GO:0006469) | negative regulation of protein serine/threonine kinase activity (GO:0071901)	unknown	14.325	14.847	38.762	98.046	99.939	97.078	97.245	581.566
TIMP1	CLGI | Clgi | EPA | EPO | HCI | TIMP | TIMP-1 | TPA-S1 | Timp	ENSOARG00000013157	.	X:53830533-53834499:-1	protein-coding	TIMP metallopeptidase inhibitor 1	protein binding (GO:0005515) | metalloendopeptidase inhibitor activity (GO:0008191) | cytokine activity (GO:0005125)	negative regulation of catalytic activity (GO:0043086) | positive regulation of cell proliferation (GO:0008284) | negative regulation of endopeptidase activity (GO:0010951) | regulation of integrin-mediated signaling pathway (GO:2001044) | negative regulation of trophoblast cell migration (GO:1901164) | negative regulation of membrane protein ectodomain proteolysis (GO:0051045)	basement membrane (GO:0005604) | extracellular space (GO:0005615) | proteinaceous extracellular matrix (GO:0005578) | extracellular exosome (GO:0070062) | extracellular region (GO:0005576)	434.914	580.125	394.643	35.195	31.616	11.133	12.675	12.12
ENSOARG00000017712	.	ENSOARG00000017712	.	JH922238.1:29651-29761:+1	protein-coding	Uncharacterized protein	unknown	unknown	unknown	435.905	531.839	579.211	284.864	284.971	349.983	288.206	308.267
ENSOARG00000015002	.	ENSOARG00000015002	.	20:27766473-27769637:-1	protein-coding	Uncharacterized protein	protein binding (GO:0005515) | peptide antigen binding (GO:0042605)	antigen processing and presentation (GO:0019882) | immune response (GO:0006955) | antigen processing and presentation of peptide antigen via MHC class I (GO:0002474) | immune system process (GO:0002376)	integral component of membrane (GO:0016021) | MHC class I protein complex (GO:0042612) | membrane (GO:0016020)	487.348	547.378	577.568	439.036	351.414	506.632	244.546	444.857
BTG2	AA959598 | APRO1 | Agl | An | PC3 | Pc3 | TIS21 | Tis21 | XBtg2 | an-1 | btg-b | cb56 | fb17g09 | wu:fb17g09 | wu:fi03a06	ENSOARG00000001574	100620047	12:485439-487221:+1	protein-coding	protein BTG2	protein binding (GO:0005515)	dentate gyrus development (GO:0021542) | skeletal muscle cell differentiation (GO:0035914) | neuron projection development (GO:0031175) | negative regulation of translation (GO:0017148) | negative regulation of neural precursor cell proliferation (GO:2000178) | negative regulation of cell proliferation (GO:0008285) | anterior/posterior pattern specification (GO:0009952) | positive regulation of n…	extracellular exosome (GO:0070062)	499.782	574.04	527.731	31.572	37.76	21.569	11.105	74.292
ENSOARG00000000949	.	ENSOARG00000000949	101103401	7:69340626-69341108:+1	protein-coding	Uncharacterized protein	structural constituent of ribosome (GO:0003735)	translation (GO:0006412)	intracellular (GO:0005622) | ribosome (GO:0005840)	561.878	562.334	573.385	227.941	231.338	189.007	185.496	254.914
TOMM6	1110002E23Rik | AI663970 | OBTP | PRICKLE4 | PRICKLE4_2 | Prickle4 | TOM6 | obtp | si:ch73-15b2.6	ENSOARG00000002660	.	20:15689252-15690318:+1	protein-coding	translocase of outer mitochondrial membrane 6	unknown	unknown	mitochondrial outer membrane translocase complex (GO:0005742) | mitochondrion (GO:0005739)	571.829	559.099	572.976	351.905	332.776	341.897	373.376	450.659
NDUFA12	2410011G03Rik | AW112974 | B17.2 | DAP13 | DDBDRAFT_0218741 | DDBDRAFT_0218742 | DDBDRAFT_0266466 | DDB_0218741 | DDB_0218742 | DDB_0266466 | RGD1311462 | si:dkey-183c16.3 | zgc:112053	ENSOARG00000015952	.	3:131047599-131075182:-1	protein-coding	NADH:ubiquinone oxidoreductase subunit A12	electron carrier activity (GO:0009055) | NADH dehydrogenase (ubiquinone) activity (GO:0008137)	response to oxidative stress (GO:0006979) | oxidation-reduction process (GO:0055114)	mitochondrial respiratory chain complex I (GO:0005747) | membrane (GO:0016020)	74.633	85.639	137.623	442.733	436.621	572.17	571.204	446.606
CALR	CG9429 | CRP55 | CRT | Calregulin | Clr | Crc | Dmel\CG9429 | ERp60 | HACBP | HEL-S-99n | RO | Rad23a | SSA | anon-EST:Liang-2.11 | anon-EST:Liang-2.17 | anon-EST:fe3D7 | cC1qR | calrl2 | cc1qr | chr3R:5454619..5454778 | clone 2.11 | clone 2.17 | crc | crt | eth | fc66d10 | potp | ssa | wu:fc66d10 | wu:fj50c03 | zgc:66153	ENSOARG00000009870	101104396	5:10700649-10703831:-1	protein-coding	calreticulin	protein binding (GO:0005515) | androgen receptor binding (GO:0050681) | glycoprotein binding (GO:0001948) | integrin binding (GO:0005178) | ubiquitin protein ligase binding (GO:0031625) | calcium ion binding (GO:0005509) | mRNA binding (GO:0003729) | poly(A) RNA binding (GO:0044822) | unfolded protein binding (GO:0051082) | carbohydrate binding (GO:0030246)	positive regulation of dendritic cell chemotaxis (GO:2000510) | negative regulation of neuron differentiation (GO:0045665) | positive regulation of DNA replication (GO:0045740) | positive regulation of phagocytosis (GO:0050766) | peptide antigen assembly with MHC class I protein complex (GO:0002502) | protein folding (GO:0006457) | negative regulation of retinoic acid receptor signaling pathway (…	extracellular space (GO:0005615) | polysome (GO:0005844) | membrane (GO:0016020) | endoplasmic reticulum (GO:0005783) | extracellular exosome (GO:0070062) | MHC class I peptide loading complex (GO:0042824) | external side of plasma membrane (GO:0009897) | nucleus (GO:0005634) | cytosol (GO:0005829) | focal adhesion (GO:0005925) | cytoplasm (GO:0005737) | perinuclear region of cytoplasm (GO:004847…	540.685	569.901	444.369	219.87	246.505	238.769	168.327	116.155
ENSOARG00000011313	.	ENSOARG00000011313	101114944	3:163451556-163453058:+1	protein-coding	Tetraspanin	unknown	unknown	integral component of membrane (GO:0016021) | membrane (GO:0016020)	566.452	568.858	457.88	191.995	215.366	133.803	119.945	164.239
MYOM2	AW146149 | Myomesin-2 | TTNAP | myomesin-2 | ttnap	ENSOARG00000005748	101102872	26:1180913-1244337:+1	protein-coding	myomesin 2	protein binding (GO:0005515)	muscle contraction (GO:0006936)	M band (GO:0031430) | mitochondrion (GO:0005739)	0.14	0.14	52.593	509.067	567.312	254.037	335.471	177.7
NDUFB4	0610006N12Rik | 1300010H20Rik | B15 | CI-B15 | NDUB4 | b15 | ci-b15 | fj49f11 | wu:fj49f10 | wu:fj49f11 | zgc:73370	ENSOARG00000019904	101108353	1:183608025-183613911:+1	protein-coding	NADH:ubiquinone oxidoreductase subunit B4	NADH dehydrogenase (ubiquinone) activity (GO:0008137)	response to oxidative stress (GO:0006979) | oxidation-reduction process (GO:0055114)	mitochondrial respiratory chain complex I (GO:0005747) | nucleoplasm (GO:0005654) | nuclear membrane (GO:0031965) | mitochondrion (GO:0005739) | extracellular exosome (GO:0070062) | mitochondrial inner membrane (GO:0005743)	134.675	147.632	190.501	499.967	449.469	497.966	566.748	411.88
ENSOARG00000012038	.	ENSOARG00000012038	.	20:9543485-9545402:+1	protein-coding	Ribosomal protein	RNA binding (GO:0003723) | structural constituent of ribosome (GO:0003735)	translation (GO:0006412)	large ribosomal subunit (GO:0015934) | intracellular ribonucleoprotein complex (GO:0030529) | ribosome (GO:0005840)	336.749	350.594	339.292	171.724	185.383	450.58	160.832	565.082
ENSOARG00000006973	.	ENSOARG00000006973	.	15:46632122-46632214:+1	protein-coding	Uncharacterized protein	unknown	unknown	unknown	459.837	336.707	487.838	324.073	518.1	336.261	564.035	251.308
NREP (assigned to ENSOARG00000016178)	.	ENSOARG00000016178	101105161	7:1958310-1963660:+1	protein-coding	neuronal regeneration related protein	protein binding (GO:0005515)	regulation of transforming growth factor beta receptor signaling pathway (GO:0017015)	unknown	213.726	183.033	338.51	145.056	188.731	124.707	124.398	563.94
FABP5	C-FABP | DA11 | E-FABP | EFABP | FABP5L2 | FABP5L7 | Fabpe | KFABP | Klbp | PA-FABP | PAFABP | mal1	ENSOARG00000008976	100270712	9:57354087-57359292:+1	protein-coding	fatty acid-binding protein, epidermal	lipid binding (GO:0008289) | transporter activity (GO:0005215)	transport (GO:0006810)	unknown	148.724	329.577	184.362	261.503	554.705	400.458	355.921	190.466
MPC2	0610006C01Rik | 2010002I07Rik | 2610205H19Rik | AA108335 | BRP44 | Brp44 | ESTM43 | RGD1563422 | brp44 | wu:fb22b02 | wu:fb22g07 | zgc:56391 | zgc:86614	ENSOARG00000012394	101115921	1:118189104-118215825:-1	protein-coding	mitochondrial pyruvate carrier 2	pyruvate transmembrane transporter activity (GO:0050833)	positive regulation of insulin secretion involved in cellular response to glucose stimulus (GO:0035774) | mitochondrial acetyl-CoA biosynthetic process from pyruvate (GO:0061732) | mitochondrial pyruvate transport (GO:0006850) | mitochondrial pyruvate transmembrane transport (GO:1902361)	nucleus (GO:0005634) | mitochondrion (GO:0005739) | mitochondrial inner membrane (GO:0005743)	79.419	88.606	143.907	310.365	319.596	516.503	547.276	554.603
ENSOARG00000006887	.	ENSOARG00000006887	.	15:62534593-62534679:+1	protein-coding	Uncharacterized protein	unknown	unknown	unknown	243.502	216.79	248.02	179.494	181.905	198.799	149.734	554.181
PFDN5/ENSOARG:16558 (assigned to ENSOARG00000016558)	.	ENSOARG00000016558	101105486	3:133057430-133060766:-1	protein-coding	prefoldin subunit 5	unfolded protein binding (GO:0051082)	protein folding (GO:0006457)	prefoldin complex (GO:0016272)	553.642	477.361	490.229	243.137	236.118	191.183	230.522	206.423
MYBPC1	8030451F13Rik | LCCS4 | MYBPCC | MYBPCS | zgc:92073	ENSOARG00000015112	101107588	3:170486337-170544238:+1	protein-coding	myosin binding protein C, slow type	protein binding (GO:0005515)	muscle contraction (GO:0006936) | positive regulation of protein targeting to mitochondrion (GO:1903955)	unknown	0.025	0.01	0.01	0.033	0.024	0.015	0.105	553.565
SLC25A6	AAC3 | ANT | ANT 2 | ANT 3 | ANT3 | ANT3Y | RGD1560896 | SLC25A5 | si:dkey-21o13.4 | wu:fj78b08	ENSOARG00000007688	.	X:611852-614111:-1	protein-coding	solute carrier family 25 member 6	protein binding (GO:0005515) | transporter activity (GO:0005215)	transport (GO:0006810) | transmembrane transport (GO:0055085)	integral component of membrane (GO:0016021) | nucleus (GO:0005634) | membrane (GO:0016020) | mitochondrion (GO:0005739) | mitochondrial inner membrane (GO:0005743)	524.386	550.86	497.21	125.248	134.669	126.264	87.433	90.972
ATP6V0E1 (assigned to ENSOARG00000004031)	.	ENSOARG00000004031	101108422	16:4774643-4794334:+1	protein-coding	ATPase H+ transporting V0 subunit e1	hydrogen ion transmembrane transporter activity (GO:0015078)	ATP hydrolysis coupled proton transport (GO:0015991)	proton-transporting V-type ATPase, V0 domain (GO:0033179)	550.84	525.128	454.391	151.453	188.669	117.158	148.657	93.574
ENSOARG00000007547	.	ENSOARG00000007547	101110151	10:15065088-15067047:-1	protein-coding	.	transcription factor activity, sequence-specific DNA binding (GO:0003700)	regulation of transcription, DNA-templated (GO:0006355)	unknown	511.543	535.829	550.713	358.664	266.251	245.501	176.384	119.103
ANXA5	ANX5 | Annexin-5 | Anx5 | ENX2 | HEL-S-7 | LC5 | PP4 | R74653 | RPRGL3 | anx5 | enx2	ENSOARG00000014830	101114445	6:3796404-3840343:+1	protein-coding	annexin A5	protein binding (GO:0005515) | calcium ion binding (GO:0005509) | calcium-dependent phospholipid binding (GO:0005544)	xenophagy (GO:0098792) | mitophagy in response to mitochondrial depolarization (GO:0098779) | negative regulation of coagulation (GO:0050819) | positive regulation of defense response to virus by host (GO:0002230) | response to organic substance (GO:0010033)	intracellular (GO:0005622) | external side of plasma membrane (GO:0009897) | endothelial microparticle (GO:0072563) | focal adhesion (GO:0005925) | membrane (GO:0016020) | extracellular exosome (GO:0070062)	476.092	550.578	402.751	97.477	114.336	76.113	61.386	66.405
ENSOARG00000012237	.	ENSOARG00000012237	.	11:22131840-22142919:-1	protein-coding	14-3-3 protein epsilon	protein domain specific binding (GO:0019904)	unknown	unknown	471.69	550.049	527.039	385.355	423.615	502.029	359.701	445.646
FGL2	AI385601 | T49 | fgl-2 | fibroleukin | musfiblp | pT49	ENSOARG00000018670	101118266	4:44004725-44008211:+1	protein-coding	fibrinogen like 2	unknown	unknown	extracellular exosome (GO:0070062)	502.254	548.843	496.003	96.218	96.636	55.91	31.869	40.818
ENSOARG00000005051	.	ENSOARG00000005051	.	12:25727059-25727433:-1	protein-coding	Uncharacterized protein	unknown	unknown	unknown	490.091	545.402	403.418	178.9	234.895	194.36	149.337	90.669
ACO2	ACC OXIDASE | ACC oxidase 2 | ACONM | ATACO2 | Aco-2 | Aco3 | D10Wsu183e | DDBDRAFT_0206187 | DDBDRAFT_0230168 | DDB_0206187 | DDB_0230168 | F10M23.310 | F10M23_310 | F24O1.40 | F24O1_40 | GRMZM5G858454 | HEL-S-284 | ICRD | OCA8 | OPA9 | aconitase 2 | cb1017 | wu:fa10e03 | wu:fb69g04 | wu:fc20c11	ENSOARG00000018307	.	3:216599148-216619489:+1	protein-coding	aconitase 2	iron ion binding (GO:0005506) | aconitate hydratase activity (GO:0003994) | 4 iron, 4 sulfur cluster binding (GO:0051539)	metabolic process (GO:0008152) | tricarboxylic acid cycle (GO:0006099) | citrate metabolic process (GO:0006101)	myelin sheath (GO:0043209) | nucleus (GO:0005634) | mitochondrion (GO:0005739)	41.696	51.263	105.249	484.916	450.196	542.53	481.669	289.828
HSPA1B	HSP70-1B | HSP70-2 | HSP70.2 | HSPA1A | Hsp70 | Hsp70-1 | Hsp70-2 | Hsp70.1 | Hsp72 | Hspa1 | Hspa1a | Hspa2 | hsp68	ENSOARG00000008817	494436	20:26660385-26662316:-1	protein-coding	heat shock 70 kDa protein 1A/1B	protein binding involved in protein folding (GO:0044183) | protein binding (GO:0005515) | ATPase activity, coupled (GO:0042623) | C3HC4-type RING finger domain binding (GO:0055131) | receptor binding (GO:0005102) | heat shock protein binding (GO:0031072) | histone deacetylase binding (GO:0042826) | nucleotide binding (GO:0000166) | enzyme binding (GO:0019899) | ATP binding (GO:0005524) | ubiquiti…	positive regulation of NF-kappaB transcription factor activity (GO:0051092) | negative regulation of inclusion body assembly (GO:0090084) | cellular response to heat (GO:0034605) | positive regulation of tumor necrosis factor-mediated signaling pathway (GO:1903265) | negative regulation of cell death (GO:0060548) | positive regulation of interleukin-8 production (GO:0032757) | negative regulation…	ubiquitin ligase complex (GO:0000151) | centriole (GO:0005814) | blood microparticle (GO:0072562) | focal adhesion (GO:0005925) | cytosol (GO:0005829) | inclusion body (GO:0016234) | cytoplasm (GO:0005737) | perinuclear region of cytoplasm (GO:0048471)	514.673	308.57	542.362	233.789	282.45	26.472	66.625	217.671
OGN	3110079A16Rik | Mimecan | OG | OIF | SLRR3A | mimecan | mimican | oif | si:ch211-103f16.4 | slrr3a | zgc:113545	ENSOARG00000008277	101108451	2:28723253-28737039:+1	protein-coding	osteoglycin	protein binding (GO:0005515)	unknown	extracellular space (GO:0005615) | extracellular matrix (GO:0031012) | extracellular vesicle (GO:1903561) | extracellular exosome (GO:0070062)	539.687	89.353	170.311	98.965	107.36	86.671	67.608	90.827
GSTM1/ENSOARG:19297 (assigned to ENSOARG00000019297)	.	ENSOARG00000019297	101108092	1:86179771-86193370:+1	protein-coding	glutathione S-transferase mu 1	protein binding (GO:0005515) | glutathione transferase activity (GO:0004364)	metabolic process (GO:0008152)	unknown	538.61	298.865	426.392	167.26	186.191	79.192	91.099	150.476
EIF4A2/ENSOARG:20517 (assigned to ENSOARG00000020517)	.	ENSOARG00000020517	.	1:198667413-198673019:-1	protein-coding	eukaryotic translation initiation factor 4A2	ATP binding (GO:0005524) | nucleic acid binding (GO:0003676) | hydrolase activity (GO:0016787) | nucleotide binding (GO:0000166) | helicase activity (GO:0004386)	metabolic process (GO:0008152)	unknown	527.005	532.018	538.579	285.435	336.921	433.862	290.553	507.392
ENSOARG00000001540	.	ENSOARG00000001540	101119804	AMGL01127362.1:1075-1422:-1	protein-coding	Uncharacterized protein	electron carrier activity (GO:0009055) | protein disulfide oxidoreductase activity (GO:0015035)	cell redox homeostasis (GO:0045454) | oxidation-reduction process (GO:0055114)	cell (GO:0005623)	496.885	537.812	467.805	121.788	124.041	177.475	116.892	120.965
NUPR1	2310032H04Rik | COM1 | Com1 | P8 | p8 | wu:fd46g12	ENSOARG00000003184	101113556	24:26091081-26091741:-1	protein-coding	nuclear protein 1, transcriptional regulator	chromatin binding (GO:0003682)	protein complex assembly (GO:0006461) | positive regulation of protein modification process (GO:0031401) | cell growth (GO:0016049) | skeletal muscle cell differentiation (GO:0035914) | positive regulation of apoptotic process (GO:0043065) | response to toxic substance (GO:0009636) | intrinsic apoptotic signaling pathway in response to DNA damage by p53 class mediator (GO:0042771) | acute inflamm…	nucleus (GO:0005634) | cytoplasm (GO:0005737)	535.052	292.183	354.79	202.925	190.367	38.98	74.664	35.44
PKIG	IPKG | PKI-gamma | PKIgamma | wu:fl39e07	ENSOARG00000004128	101109727	13:72588722-72592434:+1	protein-coding	protein kinase (cAMP-dependent, catalytic) inhibitor gamma	cAMP-dependent protein kinase inhibitor activity (GO:0004862)	negative regulation of transcription from RNA polymerase II promoter (GO:0000122) | negative regulation of protein kinase activity (GO:0006469) | negative regulation of protein import into nucleus (GO:0042308) | negative regulation of protein serine/threonine kinase activity (GO:0071901)	unknown	290.99	306.077	365.068	444.834	365.748	440.996	534.624	35.661
MFAP4	1110007F23Rik | ANGPTL7 | Magp-36 | zgc:77076	ENSOARG00000018248	.	11:33626558-33628606:+1	protein-coding	microfibrillar associated protein 4	protein binding (GO:0005515)	elastic fiber assembly (GO:0048251) | UV protection (GO:0009650) | extracellular fibril organization (GO:0043206) | cellular response to UV-B (GO:0071493) | regulation of collagen metabolic process (GO:0010712)	elastic fiber (GO:0071953) | microfibril (GO:0001527) | extracellular matrix (GO:0031012) | extracellular region (GO:0005576) | extracellular exosome (GO:0070062)	532.833	231.657	257.285	72.584	130.678	45.946	30.329	67.821
CHCHD10	1620401E04Rik | AI267078 | C17H22ORF16 | C22orf16 | CV016 | FTDALS2 | IMMD | N27C7-4 | Ndg2 | SMAJ | chchd2 | n27c7-4 | zgc:73308	ENSOARG00000013108	.	17:70490260-70494310:-1	protein-coding	coiled-coil-helix-coiled-coil-helix domain containing 10	unknown	unknown	mitochondrion (GO:0005739)	55.531	40.559	112.565	425.854	374.139	514.629	530.974	433.427
GABARAPL2	0610012F20Rik | 2900019O08Rik | AI173605 | ATG8 | ATG8C | GATE-16 | GATE16 | GBRL2 | GEF-2 | GEF2 | Gef2 | atg8 | gate-16 | gate16 | gef2 | zgc:92319	ENSOARG00000006877	101118469	14:2251815-2262220:+1	protein-coding	GABA type A receptor associated protein like 2	protein binding (GO:0005515) | ubiquitin protein ligase binding (GO:0031625)	autophagosome assembly (GO:0000045) | autophagy (GO:0006914) | negative regulation of proteasomal protein catabolic process (GO:1901799)	intracellular (GO:0005622) | autophagosome (GO:0005776) | Golgi membrane (GO:0000139) | Golgi apparatus (GO:0005794) | autophagosome membrane (GO:0000421) | cytoplasm (GO:0005737)	529.318	517.711	468.148	259.144	263.363	199.095	230.143	248.077
ENSOARG00000007092	.	ENSOARG00000007092	.	10:11975761-11978542:+1	protein-coding	.	protein kinase activator activity (GO:0030295) | protein binding (GO:0005515) | R-SMAD binding (GO:0070412) | protein kinase binding (GO:0019901)	complement activation (GO:0006956) | positive regulation of endothelial cell apoptotic process (GO:2000353) | negative regulation of endothelial cell proliferation (GO:0001937) | fibroblast activation (GO:0072537) | positive regulation of mitotic nuclear division (GO:0045840) | positive regulation of transcription from RNA polymerase II promoter (GO:0045944) | negative regulation of cell prolifer…	centrosome (GO:0005813) | nucleus (GO:0005634) | cytoplasm (GO:0005737)	154.664	183.76	125.366	408.554	498.039	467.226	528.937	273.206
HNRNPA2B1	9130414A06Rik | HNRNPA2 | HNRNPA2/B1 | HNRNPB1 | HNRPA2 | HNRPA2B1 | HNRPB1 | Hnrpa2 | Hnrpa2b1 | IBMPFD2 | RNPA2 | SNRPB1 | hnRNP | hnRNPA2/B1 | hnrnp-A | hnrnpa2 | hnrnpb1 | hnrpa2 | hnrpa2b1 | hnrpb1 | rnpa2 | snrpb1	ENSOARG00000010132	101107187	4:69718406-69726811:+1	protein-coding	heterogeneous nuclear ribonucleoprotein A2/B1	RNA binding (GO:0003723) | protein binding (GO:0005515) | miRNA binding (GO:0035198) | nucleic acid binding (GO:0003676) | N6-methyladenosine-containing RNA binding (GO:1990247) | mRNA 3'-UTR binding (GO:0003730) | single-stranded telomeric DNA binding (GO:0043047) | nucleotide binding (GO:0000166) | pre-mRNA intronic binding (GO:0097157) | poly(A) RNA binding (GO:0044822)	primary miRNA processing (GO:0031053) | RNA transport (GO:0050658) | miRNA transport (GO:1990428) | negative regulation of transcription from RNA polymerase II promoter (GO:0000122) | mRNA export from nucleus (GO:0006406) | negative regulation of mRNA splicing, via spliceosome (GO:0048025) | mRNA processing (GO:0006397) | mRNA splicing, via spliceosome (GO:0000398)	catalytic step 2 spliceosome (GO:0071013) | spliceosomal complex (GO:0005681) | intracellular ribonucleoprotein complex (GO:0030529) | nucleus (GO:0005634) | cytoplasm (GO:0005737) | membrane (GO:0016020) | nucleoplasm (GO:0005654) | extracellular exosome (GO:0070062)	446.343	528.887	473.73	290.564	312.77	311.188	241.993	350.703
SERF2	4F5REL | 4f5 | 4f5rel | C80083 | FAM2C | H4F5REL | HsT17089 | Msmac1l | fam2a | fam2c | m4F5rel | serf1 | serf1a | serf1b | smam1	ENSOARG00000011129	.	18:54373161-54374982:+1	protein-coding	small EDRK-rich factor 2	unknown	unknown	unknown	527.924	492.147	483.95	420.23	451.225	525.108	501.895	479.557
CXCL12	IRH | PBSF | Pbsf | SCYB12 | SDF-1 | SDF1 | Scyb12 | Sdf1 | TLSF | TPAR1 | Tlsf | Tpar1 | pbsf | scyb12 | sdf-1 | sdf-1a | sdf-1b | sdf1 | sdf1a | sdf1b | tlsf-a | tlsf-b | tpar1 | xSDF-1 | xSDF-1alpha	ENSOARG00000002991	.	25:44535990-44543183:+1	protein-coding	C-X-C motif chemokine ligand 12	chemokine activity (GO:0008009) | CXCR chemokine receptor binding (GO:0045236) | chemokine receptor binding (GO:0042379)	chemokine-mediated signaling pathway (GO:0070098) | negative regulation of leukocyte tethering or rolling (GO:1903237) | cell chemotaxis (GO:0060326) | negative regulation of intrinsic apoptotic signaling pathway in response to DNA damage (GO:1902230) | immune response (GO:0006955) | positive regulation of cell adhesion (GO:0045785) | positive regulation of monocyte chemotaxis (GO:0090026) | nega…	extracellular exosome (GO:0070062) | extracellular region (GO:0005576)	527.713	171.174	246.53	138.371	207.797	72.434	107.702	68.658
BMP10	BMP-10 | si:dkey-13n15.5	ENSOARG00000019859	101109160	3:39373054-39380489:+1	protein-coding	bone morphogenetic protein 10	protein binding (GO:0005515) | telethonin binding (GO:0031433) | growth factor activity (GO:0008083) | hormone activity (GO:0005179) | receptor serine/threonine kinase binding (GO:0033612)	positive regulation of cardiac muscle hypertrophy (GO:0010613) | BMP signaling pathway (GO:0030509) | positive regulation of sarcomere organization (GO:0060298) | heart trabecula formation (GO:0060347) | ventricular cardiac muscle cell development (GO:0055015) | negative regulation of cell migration (GO:0030336) | regulation of cardiac muscle hypertrophy in response to stress (GO:1903242) | ventr…	extracellular space (GO:0005615) | cytoplasm (GO:0005737) | cell surface (GO:0009986) | Z disc (GO:0030018) | extracellular region (GO:0005576)	0	0	0	0.32	526.522	0	0	0
ROMO1	2010100O12Rik | AI853864 | C13H20ORF52 | C20orf52 | DDBDRAFT_0186824 | DDBDRAFT_0304361 | DDB_0186824 | DDB_0304361 | MGR2 | MTGM | MTGMP | RA_r333_jsm669B4f | bA353C18.2 | mgr2 | mtgmp | zgc:73345 | zgc:77111	ENSOARG00000014753	101117865	13:64467859-64469002:+1	protein-coding	reactive oxygen species modulator 1	unknown	positive regulation of reactive oxygen species metabolic process (GO:2000379) | replicative cell aging (GO:0001302) | cellular response to reactive oxygen species (GO:0034614) | positive regulation of cell proliferation (GO:0008284)	mitochondrion (GO:0005739)	414.413	404.392	443.12	407.385	368.338	413.675	523.52	365.293
COX17 (assigned to ENSOARG00000005172)	.	ENSOARG00000005172	101117181	13:64391117-64391305:+1	protein-coding	COX17, cytochrome c oxidase copper chaperone	copper ion binding (GO:0005507) | copper chaperone activity (GO:0016531)	copper ion transport (GO:0006825)	mitochondrial intermembrane space (GO:0005758)	150.87	162.48	167.663	255.532	227.793	271.388	247.079	523.229
C14orf2	.	ENSOARG00000006466	105603125	18:67135509-67144388:-1	protein-coding	chromosome 14 open reading frame 2	unknown	unknown	mitochondrion (GO:0005739)	134.747	145.935	189.874	467.206	443.668	398.868	522.589	428.758
PPM1J	2310008J22Rik | PP2CZ | PP2Czeta | PPM1H | PPP2CZ | Ppp2cz | pp2cz | pp2czeta | ppm1h | ppp2cz	ENSOARG00000019749	101118144	1:89224985-89245105:-1	protein-coding	protein phosphatase, Mg2+/Mn2+ dependent 1J	protein serine/threonine phosphatase activity (GO:0004722) | protein binding (GO:0005515) | GTPase activity (GO:0003924) | nucleotide binding (GO:0000166) | catalytic activity (GO:0003824) | GTP binding (GO:0005525)	small GTPase mediated signal transduction (GO:0007264) | wound healing, spreading of cells (GO:0044319) | signal transduction (GO:0007165) | protein transport (GO:0015031) | protein dephosphorylation (GO:0006470) | skeletal muscle satellite cell migration (GO:1902766)	intracellular (GO:0005622) | membrane (GO:0016020)	459.624	519.634	409.081	111.987	137.718	188.374	113.51	128.071
HTRA1	AI429470 | ARMD7 | CADASIL2 | CARASIL | HTRA | HtrA | L56 | ORF480 | PRSS11 | Prss11 | RSPP11 | Xhtra1 | htra | l56 | prss11	ENSOARG00000007785	101101854	22:41254510-41282240:+1	protein-coding	HtrA serine peptidase 1	protein binding (GO:0005515) | serine-type peptidase activity (GO:0008236) | serine-type endopeptidase activity (GO:0004252)	placenta development (GO:0001890) | negative regulation of BMP signaling pathway (GO:0030514) | chorionic trophoblast cell differentiation (GO:0060718) | negative regulation of transforming growth factor beta receptor signaling pathway (GO:0030512) | proteolysis (GO:0006508)	extracellular matrix (GO:0031012) | plasma membrane (GO:0005886) | extracellular exosome (GO:0070062)	517.294	500.068	453.853	95.077	109.005	38.314	47.069	51.418
IGFBP4	AI875747 | BP-4 | Deb2 | HT29-IGFBP | IBP-4 | IBP4 | IGF-BP4 | IGFBP-4 | XBP4 | XIGFBP-4	ENSOARG00000014604	.	11:40250021-40260382:+1	protein-coding	insulin like growth factor binding protein 4	insulin-like growth factor binding (GO:0005520)	regulation of glucose metabolic process (GO:0010906) | positive regulation of MAPK cascade (GO:0043410) | regulation of growth (GO:0040008) | positive regulation of insulin-like growth factor receptor signaling pathway (GO:0043568) | type B pancreatic cell proliferation (GO:0044342) | regulation of cell growth (GO:0001558)	extracellular space (GO:0005615) | extracellular region (GO:0005576)	335.836	514.16	465.509	59.548	91.589	28.039	27.456	20.886
NDUFAB1	2210401F17Rik | 2310039H15Rik | 2610003B19Rik | 8kDa | 9130423F15Rik | ACP | ACPM | CI-SDAP | DDBDRAFT_0184099 | DDBDRAFT_0238774 | DDB_0184099 | DDB_0238774 | FASN2A | Mtacp1 | SDAP	ENSOARG00000000521	.	JH922500.1:6908-9789:+1	protein-coding	NADH:ubiquinone oxidoreductase subunit AB1	unknown	protein lipoylation (GO:0009249) | fatty acid biosynthetic process (GO:0006633)	mitochondrial respiratory chain complex I (GO:0005747) | mitochondrion (GO:0005739)	77.692	90.692	133.87	406.795	389.14	514.092	489.216	453.57
TPPP3	2700055K07Rik | CGI-38 | Ceacam9 | RGD1305061 | TPPP/p20 | mmCGM8 | p20 | p25gamma | zgc:77934	ENSOARG00000002965	101113519	14:34345474-34346277:-1	protein-coding	tubulin polymerization promoting protein family member 3	tubulin binding (GO:0015631)	microtubule bundle formation (GO:0001578) | microtubule polymerization (GO:0046785)	extracellular exosome (GO:0070062)	175.765	509.426	421.339	62.351	83.856	28.073	37.825	186.355
ENSOARG00000018515	.	ENSOARG00000018515	.	2:243688775-243689122:-1	protein-coding	Uncharacterized protein	transcription factor activity, sequence-specific DNA binding (GO:0003700)	regulation of transcription, DNA-templated (GO:0006355) | transcription, DNA-templated (GO:0006351)	nucleus (GO:0005634)	503.596	507.924	438.373	133.149	140.803	127.956	121.386	258.365
SMIM3	2010002N04Rik | AI195350 | AW561905 | C4H5orf62 | C5orf62 | MST150 | NID67 | Nid67 | cI-41	ENSOARG00000014392	101103892	5:59664155-59664334:+1	protein-coding	small integral membrane protein 3	protein binding (GO:0005515)	unknown	unknown	505.985	463.861	338.87	81.826	82.938	75.697	73.82	34.27
ENSOARG00000003938	.	ENSOARG00000003938	.	21:48872428-48873916:+1	protein-coding	Uncharacterized protein	aspartic-type endopeptidase activity (GO:0004190)	proteolysis (GO:0006508)	unknown	503.469	458.528	417.995	260.5	281.057	261.038	287.851	168.205
CNN3	1600014M03Rik | C85854 | Calpo3 | Calponin-3 | calponin-3	ENSOARG00000017424	101108091	1:71197685-71203535:-1	protein-coding	Calponin	actin binding (GO:0003779) | protein binding (GO:0005515) | calmodulin binding (GO:0005516)	actomyosin structure organization (GO:0031032) | epithelial cell differentiation (GO:0030855)	actin cytoskeleton (GO:0015629) | focal adhesion (GO:0005925) | cytoplasm (GO:0005737)	401.809	502.574	440.49	73.73	105.528	77.906	59.928	55.358
ENSOARG00000001878	.	ENSOARG00000001878	.	20:26502171-26515796:-1	protein-coding	Uncharacterized protein	protein binding (GO:0005515) | endopeptidase inhibitor activity (GO:0004866)	negative regulation of endopeptidase activity (GO:0010951)	extracellular space (GO:0005615) | extracellular region (GO:0005576)	495.387	285.157	245.634	66.667	76.19	10.409	15.653	2.376
SNURF (assigned to ENSOARG00000009075)	.	ENSOARG00000009075	105601857	18:964555-968030:+1	protein-coding	SNRPN upstream reading frame	unknown	unknown	unknown	444.452	486.373	494.686	248.025	281.658	162.077	214.945	116.177
PFN1 (assigned to ENSOARG00000005695)	.	ENSOARG00000005695	.	11:26067347-26068270:+1	protein-coding	profilin 1	actin binding (GO:0003779)	regulation of actin polymerization or depolymerization (GO:0008064) | positive regulation of epithelial cell migration (GO:0010634) | actin cytoskeleton organization (GO:0030036)	unknown	410.933	493.586	374.078	203.238	227.359	285.652	192.006	268.43
NDUFB5	0610007D05Rik | AU015782 | CI-SGDH | CISGDH | SGDH | hm:zeh0024 | zgc:123331	ENSOARG00000020690	101108008	1:205688435-205703763:-1	protein-coding	NADH:ubiquinone oxidoreductase subunit B5	unknown	unknown	mitochondrial respiratory chain complex I (GO:0005747) | nucleoplasm (GO:0005654) | mitochondrion (GO:0005739) | mitochondrial inner membrane (GO:0005743)	88.406	99.539	135.091	326.019	335.553	493.498	455.894	395.225
ATP6V1G1	1810024D14Rik | AA960677 | ATP6G | ATP6G1 | ATP6GL | ATP6J | Atp6g1 | VAG1 | VATG1 | Vma10 | wu:fa12a02 | wu:fq38h02 | zgc:73282	ENSOARG00000005993	101103451	2:9128650-9136979:-1	protein-coding	ATPase H+ transporting V1 subunit G1	protein binding (GO:0005515) | ATPase activity (GO:0016887) | hydrolase activity, acting on acid anhydrides, catalyzing transmembrane movement of substances (GO:0016820) | ATPase binding (GO:0051117) | hydrogen-exporting ATPase activity, phosphorylative mechanism (GO:0008553)	proton transport (GO:0015992)	intracellular (GO:0005622) | lysosomal membrane (GO:0005765) | cytosol (GO:0005829) | vacuolar proton-transporting V-type ATPase complex (GO:0016471) | plasma membrane (GO:0005886) | extracellular exosome (GO:0070062)	480.715	493.382	424.105	200.841	212.969	173.442	181.417	120.265
CSDE1	AA960392 | BC016898 | D1S155E | D3Jfr1 | UNR | Unr | d1s155e | fa92c07 | mKIAA0885 | si:ch211-261n11.2 | unr | wu:fa92c07 | wu:fa97c10 | wu:fb53f07 | wu:fb78d03	ENSOARG00000020034	101102685	1:91242050-91268955:-1	protein-coding	cold shock domain containing E1	protein binding (GO:0005515) | nucleic acid binding (GO:0003676) | poly(A) RNA binding (GO:0044822) | DNA binding (GO:0003677)	regulation of transcription, DNA-templated (GO:0006355) | nuclear-transcribed mRNA catabolic process, no-go decay (GO:0070966)	CRD-mediated mRNA stability complex (GO:0070937) | Golgi apparatus (GO:0005794) | cytoplasm (GO:0005737) | plasma membrane (GO:0005886) | mitochondrial inner membrane (GO:0005743)	178.912	170.679	180.351	148.975	170.253	189.104	128.403	490.773
HSPA8	2410008N15Rik | HEL-33 | HEL-S-72p | HSC54 | HSC70 | HSC71 | HSP70 | HSP70B | HSP71 | HSP73 | HSPA10 | Hsc70 | Hsc71 | Hsc73 | Hsp73 | Hspa10 | LAP-1 | LAP1 | NIP71 | hsc54 | hsc70 | hsc71 | hsp71 | hsp73 | hspa10 | lap1 | nip71 | wu:fb01g06 | wu:fi48b06	ENSOARG00000000142	101112844	15:33230597-33237578:-1	protein-coding	heat shock protein family A (Hsp70) member 8	C3HC4-type RING finger domain binding (GO:0055131) | protein binding (GO:0005515) | ATPase activity, coupled (GO:0042623) | heat shock protein binding (GO:0031072) | nucleotide binding (GO:0000166) | enzyme binding (GO:0019899) | ATP binding (GO:0005524) | ubiquitin protein ligase binding (GO:0031625) | poly(A) RNA binding (GO:0044822) | ATPase activity (GO:0016887) | unfolded protein binding (GO…	regulation of protein stability (GO:0031647) | protein folding (GO:0006457) | clathrin coat disassembly (GO:0072318) | chaperone mediated protein folding requiring cofactor (GO:0051085) | protein refolding (GO:0042026) | regulation of cell cycle (GO:0051726) | late endosomal microautophagy (GO:0061738) | negative regulation of fibril organization (GO:1902904) | cell morphogenesis (GO:0000902) | p…	extracellular space (GO:0005615) | membrane (GO:0016020) | ubiquitin ligase complex (GO:0000151) | extracellular exosome (GO:0070062) | myelin sheath (GO:0043209) | intracellular (GO:0005622) | blood microparticle (GO:0072562) | nucleus (GO:0005634) | late endosome (GO:0005770) | intracellular ribonucleoprotein complex (GO:0030529) | focal adhesion (GO:0005925) | cytosol (GO:0005829) | Prp19 comp…	377.293	488.333	398.757	133.186	154.103	213.645	132.053	288.465
PRDX2	AL022839 | Band-8 | HEL-S-2a | NKEF-B | NKEFB | NkefB | PRP | PRX2 | PRXII | PTX1 | PrxII | TDPX1 | TDX1 | TPX1 | TPx | TPx-B | TR | TSA | Tdpx1 | Torin | cb58 | nkefb | prdx1 | prx-2 | prx2 | prxii | tdpx1 | tpx1 | wu:fq19b09 | zgc:92891	ENSOARG00000010800	100307046	5:10811752-10813968:+1	protein-coding	peroxiredoxin 2	thioredoxin peroxidase activity (GO:0008379) | antioxidant activity (GO:0016209) | peroxiredoxin activity (GO:0051920) | oxidoreductase activity (GO:0016491)	regulation of apoptotic process (GO:0042981) | cellular response to oxidative stress (GO:0034599) | removal of superoxide radicals (GO:0019430) | response to oxidative stress (GO:0006979) | oxidation-reduction process (GO:0055114)	extracellular exosome (GO:0070062)	242.825	266.959	318.483	383.857	397.701	454.436	487.761	359.654
CISD1	AU043990 | AW743335 | C10orf70 | D10Ertd214e | MDS029 | MitoNEET | RGD1309529 | ZCD1 | Zcd1 | mitoNEET | mitoneet | si:dkey-18n13.4 | zcd1 | zgc:63561	ENSOARG00000012940	.	22:337191-347902:-1	protein-coding	CDGSH iron sulfur domain 1	2 iron, 2 sulfur cluster binding (GO:0051537)	regulation of cellular respiration (GO:0043457)	mitochondrial outer membrane (GO:0005741) | mitochondrion (GO:0005739) | extracellular exosome (GO:0070062) | intracellular membrane-bounded organelle (GO:0043231)	88.112	81.345	135.572	408.297	460.489	299.698	487.545	166.148
DAP (assigned to ENSOARG00000013884)	.	ENSOARG00000013884	101105188	16:62353233-62401948:+1	protein-coding	death associated protein	unknown	unknown	unknown	340.685	485.278	381.128	71.251	59.828	28.935	40.413	27.353
ENSOARG00000017984	.	ENSOARG00000017984	.	25:29725477-29725650:-1	protein-coding	.	unknown	unknown	unknown	417.849	418.218	386.332	436.459	404.962	276.542	485.244	362.979
ENSOARG00000015378	.	ENSOARG00000015378	100415906	22:20557569-20562826:-1	protein-coding	NADH dehydrogenase (ubiquinone) 1 beta subcomplex, 8, 19kDa	NADH dehydrogenase activity (GO:0003954) | NADH dehydrogenase (ubiquinone) activity (GO:0008137)	mitochondrial electron transport, NADH to ubiquinone (GO:0006120)	mitochondrial respiratory chain complex I (GO:0005747) | mitochondrion (GO:0005739) | mitochondrial inner membrane (GO:0005743)	159.484	164.055	218.158	426.182	388.749	392.218	484.898	359.743
MYOT	5530402I04Rik | LGMD1 | LGMD1A | MFM3 | Palladin | TTID | TTOD | Ttid | fi31g01 | si:ch211-194m19.4 | ttid | wu:fi31g01	ENSOARG00000015514	101107350	5:46724176-46739388:+1	protein-coding	myotilin	protein binding (GO:0005515)	unknown	Z disc (GO:0030018)	0.141	0.019	3.341	1.104	0.757	1.73	2.393	483.722
SVBP	2410005K17Rik | AI851162 | CCDC23 | Ccdc23 | RGD1311232 | ccd23 | ccdc23	ENSOARG00000020465	101106376	1:17059213-17064233:-1	protein-coding	small vasohibin binding protein	unknown	negative regulation of endothelial cell migration (GO:0010596) | protein secretion (GO:0009306) | negative regulation of protein ubiquitination (GO:0031397)	apical part of cell (GO:0045177)	482.635	428.928	441.517	226.074	200.752	71.166	105.38	39.781
PECAM1	C85791 | CD31 | CD31/EndoCAM | Cd31 | GPIIA' | PECA1 | PECAM-1 | Pecam | cd31 | endoCAM | pecam | pecam-1 | zmp:0000000686	ENSOARG00000014779	100303608	11:47943720-48008979:-1	protein-coding	platelet and endothelial cell adhesion molecule 1	protein binding (GO:0005515)	endothelial cell morphogenesis (GO:0001886) | wound healing (GO:0042060) | endothelial cell migration (GO:0043542) | regulation of cell migration (GO:0030334) | Rho protein signal transduction (GO:0007266) | endothelial cell-matrix adhesion (GO:0090673) | angiogenesis (GO:0001525) | positive regulation of tyrosine phosphorylation of Stat5 protein (GO:0042523)	external side of plasma membrane (GO:0009897) | cell periphery (GO:0071944) | smooth muscle contractile fiber (GO:0030485) | membrane raft (GO:0045121) | plasma membrane (GO:0005886) | membrane (GO:0016020)	222.542	481.755	349.192	72.163	113.263	67.017	51.764	50.806
ARF4	AA407803 | ARF2 | GRMZM2G034840 | MUF9.7 | MUF9_7 | arf2 | auxin response factor 4	ENSOARG00000013565	100302304	19:43620611-43638153:+1	protein-coding	ADP ribosylation factor 4	G-protein beta/gamma-subunit complex binding (GO:0031683) | protein binding (GO:0005515) | GTPase activity (GO:0003924) | epidermal growth factor receptor binding (GO:0005154) | nucleotide binding (GO:0000166) | guanyl nucleotide binding (GO:0019001) | signal transducer activity (GO:0004871) | GTP binding (GO:0005525)	regulation of reactive oxygen species metabolic process (GO:2000377) | protein localization to cilium (GO:0061512) | negative regulation of apoptotic process (GO:0043066) | cell migration (GO:0016477) | learning (GO:0007612) | small GTPase mediated signal transduction (GO:0007264) | activation of phospholipase D activity (GO:0031584) | establishment or maintenance of epithelial cell apical/basal …	ruffle membrane (GO:0032587) | Golgi apparatus (GO:0005794) | dendritic spine (GO:0043197) | membrane (GO:0016020) | plasma membrane (GO:0005886) | extracellular exosome (GO:0070062) | intracellular (GO:0005622) | cytosol (GO:0005829) | cytoplasm (GO:0005737)	427.359	477.789	371.261	106.808	122.422	101.501	73.159	87.43
ENSOARG00000010228	.	ENSOARG00000010228	.	24:27743597-27746528:-1	protein-coding	Uncharacterized protein	unknown	unknown	unknown	139.495	145.986	191.543	400.912	388.157	441.879	472.552	477.643
LDB3	AW742271 | CMD1C | CMH24 | CMPD3 | CYPHER | LDB3Z1 | LDB3Z4 | LVNC3 | MFM4 | OPN4 | ORACLE | PDLIM6 | RGD1564875 | ZASP | ldb3l	ENSOARG00000000611	.	25:40917748-40978158:+1	protein-coding	LIM domain binding 3	protein binding (GO:0005515) | cytoskeletal protein binding (GO:0008092) | metal ion binding (GO:0046872) | protein kinase C binding (GO:0005080) | muscle alpha-actinin binding (GO:0051371) | zinc ion binding (GO:0008270)	sarcomere organization (GO:0045214)	cytoskeleton (GO:0005856) | Z disc (GO:0030018)	0.902	0.239	76.138	303.18	305.822	287.578	477.066	271.869
RBP4	CG9654 | Dmel\CG9654 | MCOPCB10 | PRBP | RBP | RBPA | RDCCAS | RETB1 | RRM4 | Rbp-4 | TSR | Tsr | rbp | retb1 | rrm4 | srbp | tsr | wu:fb58d04 | wu:fb72b04 | zgc:86911	ENSOARG00000003236	.	22:14598701-14604325:-1	protein-coding	retinol binding protein 4	retinoid binding (GO:0005501) | protein binding (GO:0005515) | retinol binding (GO:0019841) | transporter activity (GO:0005215)	maintenance of gastrointestinal epithelium (GO:0030277) | transport (GO:0006810) | gluconeogenesis (GO:0006094) | response to retinoic acid (GO:0032526) | positive regulation of insulin secretion (GO:0032024) | glucose homeostasis (GO:0042593) | retinol metabolic process (GO:0042572) | eye development (GO:0001654)	extracellular space (GO:0005615) | extracellular exosome (GO:0070062)	474.654	323.783	344.865	60.313	92.189	5.383	22.338	8.736
NPC2	2700012J19Rik | AA408070 | AU045843 | CE1 | EDDM1 | EPI-1 | ESP14.6 | F12C20.9 | F12C20_9 | HE1 | cb292 | non-specific phospholipase C2 | np-c2 | re1 | sb:cb292	ENSOARG00000001076	100037669	7:82687433-82696115:-1	protein-coding	NPC intracellular cholesterol transporter 2	protein binding (GO:0005515) | cholesterol binding (GO:0015485) | enzyme binding (GO:0019899)	intracellular sterol transport (GO:0032366) | cholesterol efflux (GO:0033344) | cholesterol homeostasis (GO:0042632) | intracellular cholesterol transport (GO:0032367) | response to virus (GO:0009615) | cholesterol transport (GO:0030301)	lysosome (GO:0005764) | extracellular exosome (GO:0070062)	430.075	474.613	335.147	80.123	88.145	49.35	56.632	34.788
RARRES2	0610007L05Rik | AI303516 | HP10433 | TIG2 | chemerin | tig2	ENSOARG00000001055	101122516	4:112122338-112124900:-1	protein-coding	retinoic acid receptor responder 2	protein binding (GO:0005515) | receptor binding (GO:0005102)	inflammatory response (GO:0006954) | positive regulation of chemotaxis (GO:0050921) | positive regulation of protein phosphorylation (GO:0001934) | positive regulation of glucose import in response to insulin stimulus (GO:2001275) | retinoid metabolic process (GO:0001523) | embryonic digestive tract development (GO:0048566) | positive regulation of fat cell differentiation (GO:0045600) | brown fa…	extracellular matrix (GO:0031012) | extracellular region (GO:0005576) | extracellular exosome (GO:0070062)	458.886	474.57	436.874	105.366	117.335	40.482	53.056	34.761
ATOX1	AI256639 | ATX1 | Atx1 | CG12562 | CG32446 | DDBDRAFT_0185901 | DDBDRAFT_0266724 | DDB_0185901 | DDB_0266724 | DmAtox1 | Dmel\CG32446 | HAH1 | SAH | atx1 | hah1	ENSOARG00000009040	443451	5:60474740-60479122:-1	protein-coding	copper transport protein ATOX1	metal ion binding (GO:0046872)	metal ion transport (GO:0030001)	unknown	404.04	474.341	453.025	233.005	242.877	289.401	332.045	186.439
CD99	1110061M03Rik | 2410026K10Rik | D4 | HBA71 | MIC2 | MIC2X | MIC2Y | MSK5X | Pilr-l | im:7159661 | pilr-1 | zgc:153928	ENSOARG00000008203	.	X:1210289-1227094:+1	protein-coding	CD99 molecule	unknown	unknown	focal adhesion (GO:0005925)	462.152	473.122	451.056	122.401	118.279	77.27	74.727	121.604
ENSOARG00000006694	.	ENSOARG00000006694	101109923	21:17367736-17375692:+1	protein-coding	NADH dehydrogenase (ubiquinone) 1, subcomplex unknown, 2, 14.5kDa	NADH dehydrogenase (ubiquinone) activity (GO:0008137)	mitochondrial electron transport, NADH to ubiquinone (GO:0006120)	mitochondrion (GO:0005739) | mitochondrial inner membrane (GO:0005743)	141.655	153.544	191.907	387.348	380.987	416.062	415.37	471.965
PCBP2	AW412548 | HNRNPE2 | HNRPE2 | Hnrpx | PCBP3 | alphaCP-2 | fb36h02 | hnRNP-E2 | wu:fb36h02 | zgc:55964	ENSOARG00000016466	101103142	3:132881801-132900379:-1	protein-coding	poly(rC) binding protein 2	C-rich single-stranded DNA binding (GO:1990829) | RNA binding (GO:0003723) | protein binding (GO:0005515) | nucleic acid binding (GO:0003676) | enzyme binding (GO:0019899) | ubiquitin protein ligase binding (GO:0031625) | poly(A) RNA binding (GO:0044822) | DNA binding (GO:0003677)	negative regulation of defense response to virus (GO:0050687) | viral RNA genome replication (GO:0039694) | IRES-dependent viral translational initiation (GO:0075522) | proteasome-mediated ubiquitin-dependent protein catabolic process (GO:0043161)	nucleus (GO:0005634) | focal adhesion (GO:0005925) | cytoplasm (GO:0005737) | membrane (GO:0016020) | nucleoplasm (GO:0005654) | extracellular exosome (GO:0070062)	460.724	470.241	454.096	231.2	246.134	311.663	225.581	140.505
SDHC	0610010E03Rik | AGR_C_4794 | AI316496 | AU019277 | BA4755 | BB253_4734 | BPP5_3194 | BcDNA:RH04289 | C560 | C813_08155 | CFNIH1_13680 | CG6666 | CYB560 | CYBL | DDBDRAFT_0167473 | DDBDRAFT_0231385 | DDB_0167473 | DDB_0231385 | Dmel\CG6666 | ECK0710 | ESA_02626 | Entcl_3105 | GB12875 | Gchil_023 | JW0711 | PGL3 | PSPTO2195 | QPS1 | QPs-1 | QPs1 | RH04289p | SDH | SDH3 | VF0819 | cybA | fa91d04 | s…	ENSOARG00000010008	101105616	1:110836468-110865960:+1	protein-coding	succinate dehydrogenase complex subunit C	oxidoreductase activity, acting on the CH-CH group of donors (GO:0016627) | succinate dehydrogenase activity (GO:0000104) | electron carrier activity (GO:0009055)	tricarboxylic acid cycle (GO:0006099)	membrane (GO:0016020) | succinate dehydrogenase complex (GO:0045281) | mitochondrion (GO:0005739)	122.815	120.916	165.358	331.49	322.718	467.184	436.116	454.068
SFRP1	2210415K03Rik | AW011917 | AW107218 | AW742929 | CSFRP1 | FRP | FRP-1 | FRP1 | FrzA | SARP2 | XfrzA | frp | frp-1 | frp1 | frzA | sFRP-1 | sarp2 | sfrp1-a	ENSOARG00000002359	101121066	26:34708544-34747853:-1	protein-coding	secreted frizzled related protein 1	identical protein binding (GO:0042802) | Wnt-protein binding (GO:0017147) | frizzled binding (GO:0005109) | cysteine-type endopeptidase activity (GO:0004197) | protein binding (GO:0005515) | heparin binding (GO:0008201) | drug binding (GO:0008144)	Wnt signaling pathway involved in somitogenesis (GO:0090244) | cellular response to estradiol stimulus (GO:0071392) | convergent extension involved in somitogenesis (GO:0090246) | planar cell polarity pathway involved in neural tube closure (GO:0090179) | positive regulation of extrinsic apoptotic signaling pathway (GO:2001238) | negative regulation of osteoblast proliferation (GO:0033689) | resp…	intracellular (GO:0005622) | extracellular space (GO:0005615) | cytosol (GO:0005829) | extracellular matrix (GO:0031012) | proteinaceous extracellular matrix (GO:0005578) | cell surface (GO:0009986) | extracellular exosome (GO:0070062) | extracellular region (GO:0005576)	219.095	303.295	466.919	23.097	27.147	10.687	6.84	2.825
MRFAP1	9130413I22Rik | AL022827 | PAM14 | PGR1 | Pam14 | Pgr1 | RGD1306635	ENSOARG00000007973	101108390	6:112533887-112534267:+1	protein-coding	Morf4 family associated protein 1	protein binding (GO:0005515)	unknown	nucleus (GO:0005634)	466.122	447.347	443.429	292.428	319.431	163.762	234.969	187.607
ENSOARG00000016470	.	ENSOARG00000016470	.	5:47225278-47227722:+1	protein-coding	.	transcriptional activator activity, RNA polymerase II core promoter proximal region sequence-specific binding (GO:0001077) | protein binding (GO:0005515) | transcription factor activity, RNA polymerase II core promoter proximal region sequence-specific binding (GO:0000982) | sequence-specific DNA binding (GO:0043565) | histone acetyltransferase binding (GO:0035035) | transcription regulatory regi…	skeletal muscle cell differentiation (GO:0035914) | regulation of protein sumoylation (GO:0033233) | regulation of transcription, DNA-templated (GO:0006355) | cellular response to organic substance (GO:0071310) | response to glucose (GO:0009749) | BMP signaling pathway (GO:0030509) | response to insulin (GO:0032868) | negative regulation of canonical Wnt signaling pathway (GO:0090090) | T cell di…	nucleus (GO:0005634) | cytoplasm (GO:0005737) | nucleoplasm (GO:0005654)	263.795	465.811	431.927	69.118	97.609	7.4	6.639	29.688
PKM	AA414905 | AL024370 | AL024424 | CTHBP | HEL-S-30 | OIP3 | PARP6 | PK-S | PK3 | PKM12 | PKM2 | Pk-2 | Pk-3 | Pk3 | Pkm2 | TCB | THBP1 | cthbp | oip3 | pk3 | pklr | pkm2 | tcb | thbp1	ENSOARG00000018886	101110145	7:18780797-18808500:-1	protein-coding	pyruvate kinase, muscle	protein binding (GO:0005515) | potassium ion binding (GO:0030955) | kinase activity (GO:0016301) | catalytic activity (GO:0003824) | transferase activity (GO:0016740) | poly(A) RNA binding (GO:0044822) | magnesium ion binding (GO:0000287) | MHC class II protein complex binding (GO:0023026) | pyruvate kinase activity (GO:0004743)	programmed cell death (GO:0012501) | glycolytic process (GO:0006096) | phosphorylation (GO:0016310)	extracellular matrix (GO:0031012) | plasma membrane (GO:0005886) | vesicle (GO:0031982) | extracellular vesicle (GO:1903561) | extracellular exosome (GO:0070062) | myelin sheath (GO:0043209) | nucleus (GO:0005634) | cytoplasm (GO:0005737) | cilium (GO:0005929) | mitochondrion (GO:0005739)	149.217	177.743	170.031	156.293	179.893	219.258	222.914	460.665
CD34	AU040960	ENSOARG00000013714	101105675	12:73589869-73605431:+1	protein-coding	CD34 molecule	sulfate binding (GO:0043199) | carbohydrate binding (GO:0030246) | transcription factor binding (GO:0008134)	positive regulation of angiogenesis (GO:0045766) | endothelial cell proliferation (GO:0001935) | stem cell proliferation (GO:0072089) | positive regulation of vasculogenesis (GO:2001214) | negative regulation of cellular response to heat (GO:1900035) | positive regulation of interleukin-10 production (GO:0032733) | glomerular filtration (GO:0003094) | negative regulation of neuron death (GO:19012…	cell periphery (GO:0071944) | cell surface (GO:0009986) | plasma membrane (GO:0005886) | membrane (GO:0016020) | extracellular region (GO:0005576) | external side of plasma membrane (GO:0009897) | cytoplasm (GO:0005737) | intercellular bridge (GO:0045171) | perinuclear region of cytoplasm (GO:0048471)	330.28	460.649	335.488	109.998	136.708	105.102	84.669	75.797
ENSOARG00000001649	.	ENSOARG00000001649	101119226	9:14515827-14516593:+1	protein-coding	Uncharacterized protein	protein binding (GO:0005515) | acetylcholine receptor inhibitor activity (GO:0030550) | ion channel inhibitor activity (GO:0008200)	unknown	plasma membrane (GO:0005886) | membrane (GO:0016020)	50.923	32.154	91.523	382.692	276.184	331.197	460.538	108.631
ATP1B1	ATP1B | ATPBS | Atp4b | Atpb | Atpb-1 | NKbeta1 | Na+-K+-ATPase | atp1b | atp1b1a	ENSOARG00000009371	443384	12:34912304-34939647:+1	protein-coding	ATPase Na+/K+ transporting subunit beta 1	sodium:potassium-exchanging ATPase activity (GO:0005391) | protein binding (GO:0005515) | potassium ion binding (GO:0030955) | sodium ion binding (GO:0031402) | protein C-terminus binding (GO:0008022) | ATP binding (GO:0005524) | ATPase activator activity (GO:0001671) | MHC class II protein complex binding (GO:0023026) | ATPase activity (GO:0016887) | drug binding (GO:0008144) | ATPase binding (G…	regulation of cardiac muscle contraction by calcium ion signaling (GO:0010882) | xenophagy (GO:0098792) | positive regulation of calcium:sodium antiporter activity (GO:1903281) | regulation of gene expression (GO:0010468) | cellular calcium ion homeostasis (GO:0006874) | mitophagy in response to mitochondrial depolarization (GO:0098779) | sodium ion export from cell (GO:0036376) | ion transport (…	integral component of membrane (GO:0016021) | basolateral plasma membrane (GO:0016323) | sodium:potassium-exchanging ATPase complex (GO:0005890) | extracellular vesicle (GO:1903561) | membrane (GO:0016020) | plasma membrane (GO:0005886) | extracellular exosome (GO:0070062) | myelin sheath (GO:0043209) | sarcolemma (GO:0042383) | apical plasma membrane (GO:0016324) | intercalated disc (GO:0014704)	306.325	460.428	364.606	203.63	215.745	271.688	251.576	157.329
HSP90AB1	90kDa | AL022974 | C81438 | D6S182 | HS90B | HSP84 | HSP90 | HSP90-BETA | HSP90AA1 | HSP90B | HSP90b | HSPC2 | HSPCB | Hsp84 | Hsp84-1 | Hsp90 | Hspcb | d6s182 | hsp90-beta | hsp90b | hsp90beta | hspc2 | hspcb | wu:fa29f01 | wu:fa91e11 | wu:fd59e11 | wu:gcd22h07	ENSOARG00000009343	101117797	20:17829611-17833587:+1	protein-coding	heat shock protein 90kDa alpha family class B member 1	protein binding (GO:0005515) | histone deacetylase binding (GO:0042826) | ATP binding (GO:0005524) | kinase binding (GO:0019900) | protein kinase regulator activity (GO:0019887) | unfolded protein binding (GO:0051082) | MHC class II protein complex binding (GO:0023026) | double-stranded RNA binding (GO:0003725) | poly(A) RNA binding (GO:0044822)	placenta development (GO:0001890) | fibril organization (GO:0097435) | negative regulation of apoptotic process (GO:0043066) | virion attachment to host cell (GO:0019062) | response to stress (GO:0006950) | cellular response to interleukin-4 (GO:0071353) | protein folding (GO:0006457) | regulation of interferon-gamma-mediated signaling pathway (GO:0060334) | regulation of type I interferon-mediat…	intracellular (GO:0005622) | cytoplasm (GO:0005737) | COP9 signalosome (GO:0008180) | membrane (GO:0016020) | mitochondrion (GO:0005739) | extracellular exosome (GO:0070062)	442.131	460.103	410.582	155.133	171.129	229.543	172.308	294.584
CTSB	APPS | CATB | CB | CPSB | DDBDRAFT_0185750 | DDBDRAFT_0233997 | DDB_0185750 | DDB_0233997 | apps | cpsb	ENSOARG00000015263	780470	2:104431014-104438581:-1	protein-coding	cathepsin B	protein binding (GO:0005515) | cysteine-type endopeptidase activity (GO:0004197) | cysteine-type peptidase activity (GO:0008234) | hydrolase activity (GO:0016787) | collagen binding (GO:0005518) | proteoglycan binding (GO:0043394) | peptidase activity (GO:0008233)	viral entry into host cell (GO:0046718) | epithelial cell differentiation (GO:0030855) | decidualization (GO:0046697) | collagen catabolic process (GO:0030574) | proteolysis involved in cellular protein catabolic process (GO:0051603) | cellular response to thyroid hormone stimulus (GO:0097067) | regulation of catalytic activity (GO:0050790) | proteolysis (GO:0006508)	extracellular space (GO:0005615) | nucleolus (GO:0005730) | perinuclear region of cytoplasm (GO:0048471) | mitochondrion (GO:0005739) | lysosome (GO:0005764) | extracellular exosome (GO:0070062) | intracellular membrane-bounded organelle (GO:0043231)	411.269	459.729	285.001	80.637	85.889	73.679	58.363	85.842
TPM4	2610528G24Rik | HEL-S-108 | RAB8A | Tpm4.2 | Tpm4.2cy | tm-4 | tm4 | tpm3	ENSOARG00000000875	101117499	5:6646331-6669722:-1	protein-coding	tropomyosin 4	protein binding (GO:0005515)	osteoblast differentiation (GO:0001649)	stress fiber (GO:0001725) | podosome (GO:0002102) | filamentous actin (GO:0031941) | cortical cytoskeleton (GO:0030863) | focal adhesion (GO:0005925) | cytoplasm (GO:0005737) | membrane (GO:0016020) | extracellular exosome (GO:0070062)	375.449	457.235	273.06	52.907	75.254	51.025	34.73	43.609
ENSOARG00000012084	.	ENSOARG00000012084	101119659	12:70224382-70225419:+1	protein-coding	Uncharacterized protein	unknown	unknown	unknown	454.985	456.873	433.394	102.721	118.96	107.857	80.191	56.589
ENSOARG00000008077	.	ENSOARG00000008077	.	2:37106381-37106638:+1	protein-coding	Uncharacterized protein	structural constituent of ribosome (GO:0003735)	translation (GO:0006412)	intracellular ribonucleoprotein complex (GO:0030529) | ribosome (GO:0005840)	454.329	157.339	316.671	190.411	164.348	128.62	131.783	157.482
IGFBP6	IBP6 | IGF-BP6 | IGFBP-6 | IGFBP-6B1 | RBP6A	ENSOARG00000016699	.	3:133213326-133216912:-1	protein-coding	insulin like growth factor binding protein 6	insulin-like growth factor binding (GO:0005520)	regulation of cell growth (GO:0001558)	extracellular exosome (GO:0070062) | extracellular region (GO:0005576)	417.805	452.44	417.845	89.091	97.807	43.563	34.428	75.532
ARF1	ADP-RIBOSYLATION FACTOR | ADP-RIBOSYLATION FACTOR 1A | ADP-ribosylation factor 1 | ATARF | ATARF1 | ATARFA1A | F23H11.7 | F23H11_7 | F28C11.12 | GRMZM2G169820 | GRMZM2G169820_T01 | GRMZM2G395844 | LeARF1 | arf2 | arf3 | auxin response factor 1 | wu:fb33e02 | wu:fb78h01	ENSOARG00000006511	100302302	5:2701370-2702230:-1	protein-coding	ADP ribosylation factor 1	G-protein beta/gamma-subunit complex binding (GO:0031683) | protein binding (GO:0005515) | GTPase activity (GO:0003924) | nucleotide binding (GO:0000166) | guanyl nucleotide binding (GO:0019001) | poly(A) RNA binding (GO:0044822) | signal transducer activity (GO:0004871) | GTP binding (GO:0005525)	G-protein coupled receptor signaling pathway (GO:0007186) | small GTPase mediated signal transduction (GO:0007264) | cellular copper ion homeostasis (GO:0006878) | protein transport (GO:0015031) | intracellular protein transport (GO:0006886) | vesicle-mediated transport (GO:0016192)	Golgi apparatus (GO:0005794) | endomembrane system (GO:0012505) | extracellular exosome (GO:0070062) | intracellular (GO:0005622) | focal adhesion (GO:0005925) | cytosol (GO:0005829) | cell leading edge (GO:0031252) | sarcomere (GO:0030017)	385.806	449.582	386.853	240.737	262.665	216.334	195.493	185.961
ENSOARG00000012429	.	ENSOARG00000012429	101118902	17:62424499-62426333:+1	protein-coding	Uncharacterized protein	protein binding (GO:0005515) | dynein intermediate chain binding (GO:0045505) | protein domain specific binding (GO:0019904) | protein C-terminus binding (GO:0008022)	cilium morphogenesis (GO:0060271) | intraciliary retrograde transport (GO:0035721) | microtubule-based process (GO:0007017)	cytoplasmic dynein complex (GO:0005868) | cytoskeleton (GO:0005856) | cytosol (GO:0005829) | microtubule associated complex (GO:0005875) | membrane (GO:0016020)	381.221	435.582	448.705	237.977	216.626	172.791	191.402	138.249
ENSOARG00000016781	.	ENSOARG00000016781	101118902	1:69790494-69792328:+1	protein-coding	.	unknown	microtubule-based process (GO:0007017)	microtubule associated complex (GO:0005875)	381.221	435.582	448.705	237.977	216.626	172.791	191.402	138.249
S100B	AI850290 | Bpb | NEF | S100 | S100-B | S100P | S100beta | si:dkey-110p14.2 | wu:fq18b10 | zgc:92776	ENSOARG00000013432	101113190	1:264414341-264417467:-1	protein-coding	S100 calcium binding protein B	identical protein binding (GO:0042802) | protein binding (GO:0005515) | calcium ion binding (GO:0005509) | protein homodimerization activity (GO:0042803) | S100 protein binding (GO:0044548) | metal ion binding (GO:0046872) | calcium-dependent protein binding (GO:0048306) | RAGE receptor binding (GO:0050786) | zinc ion binding (GO:0008270)	learning or memory (GO:0007611) | regulation of neuronal synaptic plasticity (GO:0048168) | memory (GO:0007613) | positive regulation of I-kappaB kinase/NF-kappaB signaling (GO:0043123)	nucleus (GO:0005634) | cytoplasm (GO:0005737) | ruffle (GO:0001726) | perinuclear region of cytoplasm (GO:0048471) | neuronal cell body (GO:0043025) | intracellular membrane-bounded organelle (GO:0043231)	448.391	351.74	333.683	47.247	64.377	5.49	28.951	3.525
GBAS	AV006093 | NIPS2 | NIPSNAP2 | Nipsnap2 | nipsnap2 | wu:fc08b08 | zgc:92497	ENSOARG00000009926	.	24:27650613-27667523:+1	protein-coding	glioblastoma amplified sequence	protein binding (GO:0005515)	ATP biosynthetic process (GO:0006754) | negative regulation of ATP citrate synthase activity (GO:2000984) | oxidative phosphorylation (GO:0006119)	mitochondrion (GO:0005739)	64.654	64.074	91.981	267.822	288.855	308.275	239.934	448.192
CTSK	AI323530 | CTS02 | CTSO | CTSO1 | CTSO2 | MMS10-Q | Ms10q | OC-2 | PKND | PYCD | catK | cts02 | ctso | ctso1 | ctso2 | pknd | pycd | wu:fa95f03 | wu:fb08b05 | zgc:110367	ENSOARG00000020869	101108972	1:99667716-99677407:-1	protein-coding	cathepsin K	fibronectin binding (GO:0001968) | protein binding (GO:0005515) | cysteine-type endopeptidase activity (GO:0004197) | cysteine-type peptidase activity (GO:0008234) | hydrolase activity (GO:0016787) | collagen binding (GO:0005518) | peptidase activity (GO:0008233) | proteoglycan binding (GO:0043394)	collagen catabolic process (GO:0030574) | proteolysis involved in cellular protein catabolic process (GO:0051603) | regulation of mitophagy (GO:1903146) | positive regulation of protein targeting to mitochondrion (GO:1903955) | proteolysis (GO:0006508)	extracellular space (GO:0005615)	446.537	393.161	332.964	63.182	111.589	25.867	30.875	22.236
HNRNPH1	AI642080 | CBY3 | E430005G16Rik | HNRPH | HNRPH1 | Hnrnph | Hnrph | Hnrph1 | hnRNPH | hnrnph | hnrnph2 | hnrph | hnrph1 | hnrph2 | zgc:77712	ENSOARG00000003368	101122518	5:1388595-1396810:+1	protein-coding	heterogeneous nuclear ribonucleoprotein H1 (H)	RNA binding (GO:0003723) | protein binding (GO:0005515) | nucleic acid binding (GO:0003676) | poly(A) RNA binding (GO:0044822) | nucleotide binding (GO:0000166)	regulation of RNA splicing (GO:0043484)	catalytic step 2 spliceosome (GO:0071013) | cytoplasm (GO:0005737) | membrane (GO:0016020) | nucleoplasm (GO:0005654)	377.202	445.357	391.826	175.141	187.032	150.749	139.405	186.628
GOT1	AI789014 | ASAT | AST1 | ASTQTL1 | Aspat | BEST:GH07823 | CASPAT | CG8430 | Dmel\CG8430 | FBgn 1124 | GIG18 | GOT-1 | Gaspat | Got-1 | Got2 | aatc | ast1 | cAspAT | cCAT | gig18 | wu:fj63b09 | xr406 | zgc:55996	ENSOARG00000012426	101118747	22:19598844-19759436:-1	protein-coding	glutamic-oxaloacetic transaminase 1	L-aspartate:2-oxoglutarate aminotransferase activity (GO:0004069) | transferase activity (GO:0016740) | pyridoxal phosphate binding (GO:0030170) | phosphatidylserine decarboxylase activity (GO:0004609) | transaminase activity (GO:0008483) | catalytic activity (GO:0003824) | L-phenylalanine:2-oxoglutarate aminotransferase activity (GO:0080130)	aspartate catabolic process (GO:0006533) | oxaloacetate metabolic process (GO:0006107) | cellular response to insulin stimulus (GO:0032869) | cellular amino acid metabolic process (GO:0006520) | glycerol biosynthetic process (GO:0006114) | glutamate catabolic process to 2-oxoglutarate (GO:0019551) | Notch signaling pathway (GO:0007219) | glutamate catabolic process to aspartate (GO:0019550) | fat…	nucleus (GO:0005634) | cytosol (GO:0005829) | cytoplasm (GO:0005737) | extracellular exosome (GO:0070062)	13.211	13.643	56.812	334.451	326.097	289.982	444.545	138.698
SEC61B	1190006C12Rik | AI326121 | AW122942 | DDBDRAFT_0204435 | DDBDRAFT_0235194 | DDB_0204435 | DDB_0235194 | fa20b05 | sec61beta | wu:fa20b05 | zgc:92922	ENSOARG00000020274	101102793	3:201795911-201796198:+1	protein-coding	Sec61 translocon beta subunit	epidermal growth factor binding (GO:0048408) | protein binding (GO:0005515) | poly(A) RNA binding (GO:0044822)	retrograde protein transport, ER to cytosol (GO:0030970) | intracellular protein transport (GO:0006886) | ER-associated ubiquitin-dependent protein catabolic process (GO:0030433) | protein import into nucleus, translocation (GO:0000060)	Sec61 translocon complex (GO:0005784) | membrane (GO:0016020) | endoplasmic reticulum (GO:0005783)	426.236	435.117	365.906	97.433	102.211	58.122	70.28	60.587
CAST	BS-17 | DKFZP468M2312 | PLACK | calp3 | sb:cb966 | xcalp3 | zgc:194249	ENSOARG00000017709	.	5:93354399-93484087:+1	protein-coding	calpastatin	protein binding (GO:0005515) | poly(A) RNA binding (GO:0044822)	negative regulation of type B pancreatic cell apoptotic process (GO:2000675)	cytosol (GO:0005829) | cytoplasm (GO:0005737) | membrane (GO:0016020) | endoplasmic reticulum (GO:0005783)	76.101	87.925	124.467	421.83	394.251	435.116	265.263	61.291
NDUFV2	2900010C23Rik | CI-24k | DDBDRAFT_0189294 | DDBDRAFT_0233206 | DDB_0189294 | DDB_0233206 | GB17038 | NDUV2 | NUDFV2 | zgc:73198	ENSOARG00000000891	.	23:41731159-41785983:+1	protein-coding	NADH:ubiquinone oxidoreductase core subunit V2	2 iron, 2 sulfur cluster binding (GO:0051537) | iron-sulfur cluster binding (GO:0051536) | metal ion binding (GO:0046872) | oxidoreductase activity (GO:0016491) | NADH dehydrogenase (ubiquinone) activity (GO:0008137)	nervous system development (GO:0007399) | cardiac muscle tissue development (GO:0048738) | mitochondrial electron transport, NADH to ubiquinone (GO:0006120) | oxidation-reduction process (GO:0055114)	myelin sheath (GO:0043209) | mitochondrial respiratory chain complex I (GO:0005747) | mitochondrion (GO:0005739)	98	101.835	130.297	339.525	328.248	428.538	397.652	418.766
PGK1	HEL-S-68p | MIG10 | PGK | PGKA | Pgk | Pgk-1 | Pgk2 | pgk | pgk2 | pgka | phosphoglycerate kinase 1 | wu:fd59b07 | wu:fj36g06 | zgc:56252 | zgc:77899	ENSOARG00000018803	100216440	X:65709703-65731937:+1	protein-coding	phosphoglycerate kinase 1	ATP binding (GO:0005524) | phosphoglycerate kinase activity (GO:0004618) | protein binding (GO:0005515) | transferase activity (GO:0016740) | kinase activity (GO:0016301)	epithelial cell differentiation (GO:0030855) | glycolytic process (GO:0006096) | phosphorylation (GO:0016310)	membrane raft (GO:0045121) | membrane (GO:0016020) | extracellular exosome (GO:0070062)	107.724	114.43	102.352	157.418	171.202	125.941	134.515	426.713
EIF4G2	AAG1 | CG10192 | DAP-5 | DAP5 | DKFZP459G247 | Dmel\CG10192 | E130105L11Rik | NAT1 | Nat1 | Natm1 | P97 | dap5 | eIF4G-2 | ms(3)nc32 | nat1 | nc32 | ofs | p97	ENSOARG00000010243	.	15:41432300-41442594:+1	protein-coding	eukaryotic translation initiation factor 4 gamma 2	RNA binding (GO:0003723) | protein binding (GO:0005515) | binding (GO:0005488)	unknown	unknown	361.798	426.612	361.962	178.687	214.655	285.488	142.312	397.058
S100A16	2300002L21Rik | AAG13 | AI325039 | AI663996 | DT1P1A7 | S100F	ENSOARG00000000691	101105789	1:102622513-102623113:-1	protein-coding	S100 calcium binding protein A16	protein binding (GO:0005515) | calcium ion binding (GO:0005509) | protein homodimerization activity (GO:0042803) | metal ion binding (GO:0046872) | poly(A) RNA binding (GO:0044822)	response to calcium ion (GO:0051592)	nucleus (GO:0005634) | cytosol (GO:0005829) | cytoplasm (GO:0005737) | nucleolus (GO:0005730) | plasma membrane (GO:0005886) | extracellular exosome (GO:0070062)	381.004	363.111	374.388	178.627	223.584	196.545	148.691	425.398
ENSOARG00000007018	.	ENSOARG00000007018	101108484	5:16078615-16083594:+1	protein-coding	NADH dehydrogenase (ubiquinone) 1 alpha subcomplex, 11, 14.7kDa	unknown	unknown	integral component of membrane (GO:0016021) | membrane (GO:0016020)	91.826	104.918	156.669	365.135	298.839	368.113	424.771	244.95
THY1	CD7 | CD90 | CDw90 | Pro0273 | T25 | Thy-1 | Thy-1.2 | Thy1.1 | Thy1.2 | cd90 | wu:fb15c03 | wu:fb18g05 | zgc:123140	ENSOARG00000016042	101109906	15:29450455-29452173:-1	protein-coding	Thy-1 cell surface antigen	protein binding (GO:0005515) | integrin binding (GO:0005178)	negative regulation of T cell receptor signaling pathway (GO:0050860) | angiogenesis (GO:0001525) | retinal cone cell development (GO:0046549)	anchored component of external side of plasma membrane (GO:0031362) | dendrite (GO:0030425) | endoplasmic reticulum (GO:0005783) | extracellular exosome (GO:0070062) | myelin sheath (GO:0043209) | external side of plasma membrane (GO:0009897) | focal adhesion (GO:0005925) | membrane raft (GO:0045121) | apical plasma membrane (GO:0016324)	423.566	355.51	290.609	58.466	58.801	26.51	30.438	54.281
LINC00998	.	ENSOARG00000008353	.	4:55341914-55342090:+1	protein-coding	Uncharacterized protein	unknown	unknown	unknown	342.062	366.189	363.729	416.256	404.916	299.225	422.602	227.822
PTGES3	5730442A20Rik | CPGES | GekBS072P | P23 | Ptges | RGD1561913 | TEBP | Tebp | cPGES | p23 | sid3177 | tebp	ENSOARG00000008286	.	3:162705713-162710618:+1	protein-coding	prostaglandin E synthase 3	unknown	prostaglandin biosynthetic process (GO:0001516) | skin development (GO:0043588) | glucocorticoid receptor signaling pathway (GO:0042921) | lung saccule development (GO:0060430) | glycogen biosynthetic process (GO:0005978) | cell proliferation (GO:0008283)	unknown	387.314	422.506	411.029	192.006	215.508	217.621	162.144	198.733
RAC1	2248 | AL023026 | CG2248 | CRAC1A | D-Rac | D-Rac 1 | D-Rac1 | D5Ertd559e | DRac | DRac1 | DRacA | Dm Rac1 | DmRAC | DmRAC1 | Dmel\CG2248 | Dmrac1 | Drac | Drac1 | Drac1a | DracA | GTPase Rac1 | MIG5 | P40792 | RAC1 | RAC2 | Rac | Rac GTPase | Rac-1 | Rac3 | RacA | TC-25 | Xrac | dRac | dRac1 | mig5 | p21-Rac1 | p21-rac1 | rac | rac1 | tc-25	ENSOARG00000002021	100101233	24:38166137-38175158:+1	protein-coding	ras-related C3 botulinum toxin substrate 1	protein binding (GO:0005515) | GTPase activity (GO:0003924) | GTP-dependent protein binding (GO:0030742) | nucleotide binding (GO:0000166) | enzyme binding (GO:0019899) | thioesterase binding (GO:0031996) | GTP binding (GO:0005525)	positive regulation of actin filament polymerization (GO:0030838) | cell-cell junction organization (GO:0045216) | engulfment of apoptotic cell (GO:0043652) | cell migration (GO:0016477) | regulation of cell migration (GO:0030334) | small GTPase mediated signal transduction (GO:0007264) | positive regulation of GTPase activity (GO:0043547) | negative regulation of interleukin-23 production (GO:00…	plasma membrane (GO:0005886) | extracellular exosome (GO:0070062) | cytoplasmic, membrane-bounded vesicle (GO:0016023) | intracellular (GO:0005622) | nucleus (GO:0005634) | actin filament (GO:0005884) | cytoplasm (GO:0005737) | lamellipodium (GO:0030027) | extrinsic component of plasma membrane (GO:0019897) | cell projection (GO:0042995) | ruffle membrane (GO:0032587) | early endosome membrane (G…	337.529	421.824	352.271	138.188	172.985	178.58	123.433	218.684
HSPB8	AU018630 | AW413033 | CMT2L | Cryac | D5Ucla4 | DHMN2 | E2IG1 | H11 | H11K | HMN2 | HMN2A | HSP20-like | HSP22 | Hsp22 | cmt2l | dhmn2 | e2ig1 | fc09c11 | h11 | hmn2 | hmn2a | hsp22 | wu:fc04b04 | wu:fc09c11 | zgc:64202	ENSOARG00000001872	101108164	17:55714371-55726502:-1	protein-coding	heat shock protein family B (small) member 8	identical protein binding (GO:0042802) | protein binding (GO:0005515)	unknown	intracellular (GO:0005622) | nucleus (GO:0005634) | Golgi apparatus (GO:0005794) | cytoplasm (GO:0005737) | nucleoplasm (GO:0005654)	177.066	416.044	332.57	156.14	288.471	198.715	232.389	389.161
TNNT3	TNTF | TnTf | Tnt | amcd2b | da2b | fTnT | fssv | tnnt3a	ENSOARG00000000697	101104467	JH922959.1:17616-26464:+1	protein-coding	troponin T3, fast skeletal type	actin binding (GO:0003779) | calcium-dependent ATPase activity (GO:0030899) | tropomyosin binding (GO:0005523) | calcium-dependent protein binding (GO:0048306) | troponin C binding (GO:0030172) | troponin I binding (GO:0031013)	regulation of ATPase activity (GO:0043462) | regulation of muscle contraction (GO:0006937) | regulation of striated muscle contraction (GO:0006942) | skeletal muscle contraction (GO:0003009)	troponin complex (GO:0005861)	6.598	7.596	7.967	1.529	2.015	7.637	1.508	415.604
CDC42SE1	1300002M12Rik | AW558204 | Cdcse1 | SCIP1 | SPEC1 | Spec1 | scip1 | spec1 | wu:fa55c04 | wu:fc05d06 | zgc:55642	ENSOARG00000020926	101110804	1:99897673-99899278:-1	protein-coding	CDC42 small effector 1	unknown	unknown	unknown	304.247	412.188	350.806	118.812	149.639	79.924	82.988	58.762
ENSOARG00000014893	.	ENSOARG00000014893	.	1:63359961-63395131:-1	protein-coding	15 kDa selenoprotein	unknown	unknown	unknown	379.792	411.485	334.444	149.594	158.193	127.197	111.579	128.101
ISCU	2310020H20Rik | AA407971 | BB253_0105 | BPP5_2155 | CG9836 | Dmel\CG9836 | ECK2526 | GB13375 | HML | ISU2 | JW2513 | LA3559 | NIFU | NIFUN | Nifu | Nifun | PSPTO1424 | RGD1309562 | VF0618 | cg9836 | dIscU | hnifU | hsm-5 | iscu | isu2 | miaC | nifU | nifu | nifun | yfhN	ENSOARG00000018011	.	17:64035323-64040929:-1	protein-coding	iron-sulfur cluster assembly enzyme	protein complex scaffold (GO:0032947) | iron ion binding (GO:0005506) | protein binding (GO:0005515) | iron-sulfur cluster binding (GO:0051536)	iron-sulfur cluster assembly (GO:0016226)	cytosol (GO:0005829) | cytoplasm (GO:0005737) | mitochondrion (GO:0005739)	197.405	174.705	207.761	334.955	319.307	344.511	411.422	174.86
NR4A2	HZF-3 | NGFI-B | NOT | NURR1 | Nurr1 | RNR-1 | RNR1 | TINOR | TINUR | hzf-3 | not | nurr1 | rnr1 | tinur	ENSOARG00000007984	101114494	2:152145600-152150524:+1	protein-coding	nuclear receptor subfamily 4 group A member 2	transcriptional activator activity, RNA polymerase II core promoter proximal region sequence-specific binding (GO:0001077) | protein binding (GO:0005515) | steroid hormone receptor activity (GO:0003707) | sequence-specific DNA binding (GO:0043565) | metal ion binding (GO:0046872) | RNA polymerase II transcription factor activity, ligand-activated sequence-specific DNA binding (GO:0004879) | RNA p…	central nervous system neuron differentiation (GO:0021953) | positive regulation of transcription from RNA polymerase II promoter (GO:0045944) | cellular response to extracellular stimulus (GO:0031668) | intracellular receptor signaling pathway (GO:0030522) | transcription, DNA-templated (GO:0006351) | neuron migration (GO:0001764) | cellular response to corticotropin-releasing hormone stimulus (…	nucleus (GO:0005634) | nucleoplasm (GO:0005654)	265.209	410.624	288.183	9.404	13.787	6.237	1.628	24.997
SMIM11A	C1H21ORF51 | C21orf51 | FAM165B | SMIM11 | Smim11 | fam165b | smim11	ENSOARG00000007650	101119598	1:119324986-119325162:-1	protein-coding	small integral membrane protein 11A	unknown	unknown	unknown	308.835	313.695	354.589	175.715	198.677	219.854	266.515	409.807
TGM2	G-ALPHA-h | GNAH | G[a]h | HEL-S-45 | TG2 | TGC | TGL2 | TGase2 | TgaseII | g-alpha-h | gnah | tTG | tTGas | tg2 | tgc	ENSOARG00000018528	101123140	13:66592413-66621019:-1	protein-coding	transglutaminase 2	protein binding (GO:0005515) | metal ion binding (GO:0046872) | protein-glutamine gamma-glutamyltransferase activity (GO:0003810)	apoptotic cell clearance (GO:0043277) | salivary gland cavitation (GO:0060662) | positive regulation of apoptotic process (GO:0043065) | peptide cross-linking (GO:0018149) | negative regulation of endoplasmic reticulum calcium ion concentration (GO:0032471) | positive regulation of cell adhesion (GO:0045785) | branching involved in salivary gland morphogenesis (GO:0060445) | positive regulation o…	cytosol (GO:0005829) | focal adhesion (GO:0005925) | mitochondrion (GO:0005739) | intrinsic component of plasma membrane (GO:0031226) | extracellular exosome (GO:0070062)	310.284	273.012	409.422	95.27	122.587	69.084	50.062	14.05
CNBP	AA408710 | CNBP1 | Cchc | Cnbp1 | DM2 | PROMM | RNF163 | ZCCHC22 | ZNF9 | Znf9 | cnbp1 | cnbpa | dm2 | promm | rnf163 | xcnbp | zcchc22 | znf9	ENSOARG00000003577	101106550	19:58870691-58871992:-1	protein-coding	CCHC-type zinc finger nucleic acid binding protein	protein binding (GO:0005515) | nucleic acid binding (GO:0003676) | metal ion binding (GO:0046872) | poly(A) RNA binding (GO:0044822) | zinc ion binding (GO:0008270)	positive regulation of transcription from RNA polymerase II promoter (GO:0045944) | positive regulation of cell proliferation (GO:0008284) | positive regulation of transcription, DNA-templated (GO:0045893)	nucleus (GO:0005634) | cytosol (GO:0005829) | endoplasmic reticulum (GO:0005783)	356.802	335.483	386.827	270.249	269.933	235.265	272.157	408.878
NOV	C130088N23Rik | CCN3 | F18A5.140 | F18A5_140 | IBP-9 | IGFBP-9 | IGFBP9 | NO VEIN | NOVh | NovH | nov-A | xnov	ENSOARG00000009469	101113859	9:57701139-57708761:-1	protein-coding	nephroblastoma overexpressed	protein binding (GO:0005515) | Notch binding (GO:0005112) | integrin binding (GO:0005178) | insulin-like growth factor binding (GO:0005520)	cell chemotaxis (GO:0060326) | negative regulation of insulin secretion (GO:0046676) | hematopoietic stem cell homeostasis (GO:0061484) | negative regulation of monocyte chemotaxis (GO:0090027) | smooth muscle cell migration (GO:0014909) | fibroblast migration (GO:0010761) | negative regulation of inflammatory response (GO:0050728) | positive regulation of Notch signaling pathway (GO:0045747) | e…	cytoplasm (GO:0005737) | gap junction (GO:0005921) | intracellular membrane-bounded organelle (GO:0043231) | extracellular region (GO:0005576)	407.915	376.259	331.982	36.136	56.893	22.188	7.981	23.436
ENSOARG00000018602	.	ENSOARG00000018602	.	JH924890.1:127-267:+1	protein-coding	Uncharacterized protein	unknown	unknown	unknown	324.526	406.333	363.186	154.344	157.98	120.892	169.572	199.991
ENSOARG00000011945	.	ENSOARG00000011945	101111152	24:33207713-33230245:-1	protein-coding	.	protein binding (GO:0005515) | extracellular matrix binding (GO:0050840) | extracellular matrix structural constituent (GO:0005201)	extracellular matrix organization (GO:0030198) | regulation of actin filament polymerization (GO:0030833) | stress fiber assembly (GO:0043149) | skeletal muscle tissue development (GO:0007519)	elastic fiber (GO:0071953) | proteinaceous extracellular matrix (GO:0005578) | mitochondrion (GO:0005739)	405.591	333.669	300.977	29.128	41.353	20.222	8.953	20.106
PEA15	HMAT1 | HUMMAT1H | MAT1 | MAT1H | PEA-15 | PED | Pea15a	ENSOARG00000008483	101118912	1:109563513-109565533:+1	protein-coding	phosphoprotein enriched in astrocytes 15	protein binding (GO:0005515)	regulation of apoptotic process (GO:0042981) | DNA damage checkpoint (GO:0000077) | negative regulation of glucose import (GO:0046325) | negative regulation of extrinsic apoptotic signaling pathway via death domain receptors (GO:1902042) | positive regulation of extrinsic apoptotic signaling pathway via death domain receptors (GO:1902043)	unknown	395.19	405.306	353.277	144.841	196.286	79.22	102.11	57.171
ENSOARG00000010798	.	ENSOARG00000010798	.	13:6063924-6064738:-1	protein-coding	.	ribose phosphate diphosphokinase activity (GO:0004749) | magnesium ion binding (GO:0000287)	nucleotide biosynthetic process (GO:0009165)	unknown	385.442	404.215	299.38	157.083	272.475	250.48	135.579	333.774
PSENEN (assigned to ENSOARG00000005020)	.	ENSOARG00000005020	101120856	14:45580974-45581877:+1	protein-coding	presenilin enhancer gamma-secretase subunit	protein binding (GO:0005515)	Notch receptor processing (GO:0007220)	unknown	388.719	404.076	368.579	219.968	218.837	194.234	246.941	236.607
HMGN3	1110002A15Rik | 6330514M13Rik | BB071015 | PNAS-24 | PNAS-25 | TRIP7 | fa04b03 | pnas-24 | pnas-25 | trip7 | wu:fa04b03 | zgc:92355	ENSOARG00000006997	101112400	8:5957391-5969627:-1	protein-coding	high mobility group nucleosomal binding domain 3	chromatin binding (GO:0003682) | nucleosomal DNA binding (GO:0031492)	positive regulation of transcription from RNA polymerase II promoter (GO:0045944) | regulation of insulin secretion involved in cellular response to glucose stimulus (GO:0061178) | positive regulation of sequence-specific DNA binding transcription factor activity (GO:0051091) | regulation of transcription from RNA polymerase II promoter (GO:0006357)	nucleus (GO:0005634) | chromatin (GO:0000785)	342.685	359.178	403.845	173.811	190.194	113.962	166.26	143.558
NDUFA7 (assigned to ENSOARG00000003683)	.	ENSOARG00000003683	101103062	5:14642645-14649676:-1	protein-coding	NADH:ubiquinone oxidoreductase subunit A7	NADH dehydrogenase (ubiquinone) activity (GO:0008137)	ATP synthesis coupled electron transport (GO:0042773)	mitochondrion (GO:0005739) | mitochondrial inner membrane (GO:0005743)	72.923	71.501	112.484	239.476	240.417	313.055	400.891	285.244
CSRP1	AA408841 | AA959891 | AW545626 | CRP | CRP1 | CSRP | CYRP | Csrp | D1S181E | HEL-141 | HEL-S-286	ENSOARG00000018693	.	12:78543637-78552280:+1	protein-coding	cysteine and glycine rich protein 1	protein binding (GO:0005515) | metal ion binding (GO:0046872) | poly(A) RNA binding (GO:0044822) | zinc ion binding (GO:0008270)	platelet aggregation (GO:0070527)	focal adhesion (GO:0005925) | extracellular exosome (GO:0070062)	400.608	386.882	345.862	217.447	205.937	44.257	61.541	39.593
EIF4A1	BM-010 | DDX2A | Ddx2a | EIF-4A | EIF4A | Eif4 | RH4 | TIF4A1 | ddx2a | eIF-4A-I | eIF4A-I | eif-4a | eif4a | eukaryotic translation initiation factor 4A1	ENSOARG00000014476	105601858	11:26864899-26870392:+1	protein-coding	eukaryotic translation initiation factor 4A1	nucleic acid binding (GO:0003676) | protein binding (GO:0005515) | hydrolase activity (GO:0016787) | nucleotide binding (GO:0000166) | ATP binding (GO:0005524) | double-stranded RNA binding (GO:0003725) | poly(A) RNA binding (GO:0044822) | helicase activity (GO:0004386)	metabolic process (GO:0008152)	cytoplasm (GO:0005737) | membrane (GO:0016020) | extracellular exosome (GO:0070062)	287.674	400.183	253.399	75.342	92.866	72.925	59.024	55.714
NDUFA6	14kDa | 2700038D15Rik | B14 | B230217P19Rik | CI-B14 | DDBDRAFT_0189250 | DDBDRAFT_0233241 | DDB_0189250 | DDB_0233241 | LYRM6 | NADHB14 | NDUA6 | zgc:56717	ENSOARG00000018854	101114007	3:217072782-217082377:-1	protein-coding	NADH:ubiquinone oxidoreductase subunit A6	unknown	response to oxidative stress (GO:0006979)	mitochondrial membrane (GO:0031966) | mitochondrial respiratory chain complex I (GO:0005747) | mitochondrion (GO:0005739)	85.48	87.207	129.661	285.132	279.263	336.006	400.006	209.604
PABPC1	DKFZP469O2326 | PAB1 | PABP | PABP1 | PABPC2 | PABPL1 | Pabp | Pabp1 | PabpI | Pabpl1 | ePAB | pab1 | pabp | pabp1 | pabpc2	ENSOARG00000000095	100135436	9:76238586-76252134:+1	protein-coding	poly(A) binding protein cytoplasmic 1	RNA binding (GO:0003723) | nucleic acid binding (GO:0003676) | protein binding (GO:0005515) | poly(U) RNA binding (GO:0008266) | poly(A) binding (GO:0008143) | protein C-terminus binding (GO:0008022) | nucleotide binding (GO:0000166) | poly(A) RNA binding (GO:0044822)	negative regulation of nuclear-transcribed mRNA catabolic process, nonsense-mediated decay (GO:2000623) | positive regulation of viral genome replication (GO:0045070) | positive regulation of nuclear-transcribed mRNA poly(A) tail shortening (GO:0060213) | positive regulation of nuclear-transcribed mRNA catabolic process, deadenylation-dependent decay (GO:1900153) | gene silencing by RNA (GO:00310…	cytoplasmic stress granule (GO:0010494) | membrane (GO:0016020) | extracellular exosome (GO:0070062) | cytoplasmic ribonucleoprotein granule (GO:0036464) | catalytic step 2 spliceosome (GO:0071013) | intracellular ribonucleoprotein complex (GO:0030529) | nucleus (GO:0005634) | focal adhesion (GO:0005925) | cytoplasm (GO:0005737)	398.747	398.397	353.445	83.451	98.033	137.678	64.864	79.431
PCOLCE	Astt-2 | Astt2 | P14 | PCPE | PCPE-1 | PCPE1	ENSOARG00000016574	101104033	24:35843017-35847949:-1	protein-coding	procollagen C-endopeptidase enhancer	protein binding (GO:0005515) | peptidase activator activity (GO:0016504) | heparin binding (GO:0008201) | collagen binding (GO:0005518)	proteolysis (GO:0006508) | positive regulation of peptidase activity (GO:0010952)	extracellular space (GO:0005615) | extracellular matrix (GO:0031012) | extracellular exosome (GO:0070062) | extracellular region (GO:0005576)	397.171	341.338	311.096	79.123	84.615	71.123	54.077	96.67
NDFIP1	0610010M22Rik | N4WBP5 | N4wbp5 | n4wbp5 | wu:fc17e11 | zgc:55546	ENSOARG00000001779	.	5:50550206-50570222:+1	protein-coding	Nedd4 family interacting protein 1	protein binding (GO:0005515) | signal transducer activity (GO:0004871)	negative regulation of isotype switching to IgE isotypes (GO:0048294) | negative regulation of gene expression (GO:0010629) | negative regulation of inflammatory response (GO:0050728) | regulation of lymphocyte differentiation (GO:0045619) | negative regulation of type 2 immune response (GO:0002829) | positive regulation of protein ubiquitination (GO:0031398) | ubiquitin-dependent protein catabol…	Golgi apparatus (GO:0005794) | cell cortex (GO:0005938) | perinuclear region of cytoplasm (GO:0048471)	380.731	396.353	356.476	122.188	134.35	115.824	105.017	111.894
TCEB2	0610040H15Rik | ELOB | SIII | cb162 | elob | elongin-B | elonginb | siii | wu:fb47e08	ENSOARG00000000340	101118496	24:2254105-2257982:+1	protein-coding	transcription elongation factor B subunit 2	protein binding (GO:0005515) | ubiquitin protein ligase binding (GO:0031625)	unknown	Cul2-RING ubiquitin ligase complex (GO:0031462) | elongin complex (GO:0070449) | extracellular exosome (GO:0070062) | Cul5-RING ubiquitin ligase complex (GO:0031466)	326.415	346.743	373.82	338.623	310.36	305.97	396.239	300.385
PTHLH	BDE2 | HHM | PLP | PTH-RP | PTH-like | PTHR | PTHRP | PTHrP | Pthrp | pthrp	ENSOARG00000019663	443135	3:186632460-186639002:+1	protein-coding	parathyroid hormone-like hormone	hormone activity (GO:0005179) | peptide hormone receptor binding (GO:0051428)	regulation of gene expression (GO:0010468) | adenylate cyclase-activating G-protein coupled receptor signaling pathway (GO:0007189) | skeletal system development (GO:0001501) | negative regulation of chondrocyte differentiation (GO:0032331) | positive regulation of cAMP biosynthetic process (GO:0030819) | regulation of chondrocyte differentiation (GO:0032330)	Golgi apparatus (GO:0005794) | cytoplasm (GO:0005737) | nucleoplasm (GO:0005654) | extracellular region (GO:0005576)	95.748	396.193	226.805	3.784	5.252	0.957	0.352	7.45
EF-1	.	ENSOARG00000000129	443504	9:14066880-14071946:+1	protein-coding	elongation factor 1-delta	translation elongation factor activity (GO:0003746)	translation (GO:0006412) | translational elongation (GO:0006414)	eukaryotic translation elongation factor 1 complex (GO:0005853)	390.013	351.515	395.423	273.087	236.55	238.626	239.701	350.942
ARPC3	1110006A04Rik | ARC21 | T13D8.30 | T13D8_30 | actin-related protein C3 | arc21 | p21-ARC | p21-Ar | p21-Arc | p21-arc | p21Arc | zgc:86828	ENSOARG00000016761	.	17:53911301-53919327:-1	protein-coding	actin related protein 2/3 complex subunit 3	protein binding (GO:0005515) | structural constituent of cytoskeleton (GO:0005200) | actin filament binding (GO:0051015)	Arp2/3 complex-mediated actin nucleation (GO:0034314) | regulation of actin filament polymerization (GO:0030833)	cytoskeleton (GO:0005856) | focal adhesion (GO:0005925) | lamellipodium (GO:0030027) | membrane (GO:0016020) | Arp2/3 protein complex (GO:0005885) | extracellular exosome (GO:0070062)	349.046	394.922	289.67	76.147	98.665	87.946	68.62	69.263
FOSB	AP-1 | G0S3 | GOS3 | GOSB | fra-2 | zgc:92354	ENSOARG00000009983	.	14:52143114-52147300:+1	protein-coding	FosB proto-oncogene, AP-1 transcription factor subunit	transcriptional activator activity, RNA polymerase II core promoter proximal region sequence-specific binding (GO:0001077) | sequence-specific DNA binding (GO:0043565) | RNA polymerase II core promoter proximal region sequence-specific DNA binding (GO:0000978) | DNA binding (GO:0003677) | transcription factor activity, sequence-specific DNA binding (GO:0003700)	positive regulation of transcription from RNA polymerase II promoter (GO:0045944) | cellular response to calcium ion (GO:0071277) | regulation of transcription, DNA-templated (GO:0006355) | regulation of transcription from RNA polymerase II promoter (GO:0006357)	nucleus (GO:0005634)	215.486	393.767	221.919	16.528	30.465	2.157	1.745	9.81
ANXA1	ANX1 | Annexin-1 | Anx-1 | Anx-A1 | Anx1 | C430014K04Rik | LPC1 | Lpc-1 | Lpc1 | anx1 | lpc1 | p35	ENSOARG00000012672	101123269	2:62999570-63011634:-1	protein-coding	annexin A1	structural molecule activity (GO:0005198) | protein binding (GO:0005515) | calcium ion binding (GO:0005509) | phospholipase A2 inhibitor activity (GO:0019834) | calcium-dependent protein binding (GO:0048306) | phospholipase inhibitor activity (GO:0004859) | protein binding, bridging (GO:0030674) | calcium-dependent phospholipid binding (GO:0005544)	inflammatory response (GO:0006954) | peptide cross-linking (GO:0018149) | actin cytoskeleton reorganization (GO:0031532) | regulation of hormone secretion (GO:0046883) | cellular response to glucocorticoid stimulus (GO:0071385) | positive regulation of T-helper 1 cell differentiation (GO:0045627) | phagocytosis (GO:0006909) | neutrophil homeostasis (GO:0001780) | regulation of leukocyte migration…	lateral plasma membrane (GO:0016328) | extracellular space (GO:0005615) | cell surface (GO:0009986) | plasma membrane (GO:0005886) | extracellular exosome (GO:0070062) | cornified envelope (GO:0001533) | endosome (GO:0005768) | nucleus (GO:0005634) | sarcolemma (GO:0042383) | cytoplasm (GO:0005737) | nucleoplasm (GO:0005654) | vesicle (GO:0031982) | extrinsic component of external side of plasma …	378.881	393.512	287.081	66.68	74.884	102.47	40.588	95.072
LTBP4	2310046A13Rik | ARCL1C | LTBP-4 | LTBP4L | LTBP4S	ENSOARG00000006826	.	14:49041927-49069895:+1	protein-coding	latent transforming growth factor beta binding protein 4	transforming growth factor beta binding (GO:0050431) | protein binding (GO:0005515) | calcium ion binding (GO:0005509)	regulation of proteolysis (GO:0030162)	extracellular space (GO:0005615) | extracellular matrix (GO:0031012) | proteinaceous extracellular matrix (GO:0005578) | extracellular exosome (GO:0070062)	389.747	364.388	392.333	101.468	125.283	109.921	55.401	48.146
ECM1	AI663821 | URBWD | p85	ENSOARG00000020820	101105541	1:99441346-99446281:+1	protein-coding	extracellular matrix protein 1	protein binding (GO:0005515) | laminin binding (GO:0043236) | protease binding (GO:0002020) | interleukin-2 receptor binding (GO:0005134) | protein C-terminus binding (GO:0008022) | signal transducer activity (GO:0004871) | enzyme binding (GO:0019899)	positive regulation of angiogenesis (GO:0045766) | inflammatory response (GO:0006954) | regulation of type 2 immune response (GO:0002828) | regulation of T cell migration (GO:2000404) | positive regulation of endothelial cell proliferation (GO:0001938) | negative regulation of peptidase activity (GO:0010466) | negative regulation of bone mineralization (GO:0030502) | regulation of transcription f…	extracellular space (GO:0005615) | extracellular matrix (GO:0031012) | extracellular exosome (GO:0070062) | extracellular region (GO:0005576)	311.155	391.612	371.113	59.829	71.838	31.555	15.147	20.698
SDHA	1500032O14Rik | 2310034D06Rik | 4921513A11 | A284_08130 | A458_11480 | ACTODO_00294 | AGR_C_4792 | ASA_2359 | AT03_06860 | ATZ20_04575 | Abm4_0015 | Aflv_0581 | Ahos_2158 | B739_1097 | BA4754 | BACINT_00967 | BAMF_2650 | BB253_4736 | BD94_0317 | BD94_0883 | BDI_3209 | BL00322 | BMD_4710 | BN140_0103 | BPP5_3192 | BRM9_0092 | BVU_1240 | Bache_0806 | Bcoa_2586 | C81073 | C813_08145 | CFNIH1_13690 |…	ENSOARG00000015619	100036762	16:70491222-70512526:+1	protein-coding	succinate dehydrogenase complex flavoprotein subunit A	succinate dehydrogenase activity (GO:0000104) | oxidoreductase activity, acting on the CH-CH group of donors (GO:0016627) | protein binding (GO:0005515) | flavin adenine dinucleotide binding (GO:0050660) | succinate dehydrogenase (ubiquinone) activity (GO:0008177) | oxidoreductase activity (GO:0016491)	succinate metabolic process (GO:0006105) | nervous system development (GO:0007399) | tricarboxylic acid cycle (GO:0006099) | respiratory electron transport chain (GO:0022904) | electron transport chain (GO:0022900) | oxidation-reduction process (GO:0055114)	myelin sheath (GO:0043209) | mitochondrion (GO:0005739) | mitochondrial inner membrane (GO:0005743)	49.648	55.156	91.615	283.885	284.579	391.419	340.741	326.636
ENSOARG00000017251	.	ENSOARG00000017251	.	5:48108302-48116211:-1	protein-coding	Uncharacterized protein	unknown	negative regulation of angiogenesis (GO:0016525)	cytosol (GO:0005829) | plasma membrane (GO:0005886)	244.503	391.149	294.554	92.475	110.763	75.437	66.984	43.736
ENSOARG00000006087	.	ENSOARG00000006087	101113516	13:73805251-73809842:+1	protein-coding	Uncharacterized protein	serine-type endopeptidase inhibitor activity (GO:0004867)	negative regulation of endopeptidase activity (GO:0010951)	unknown	7.053	10.706	390.851	2.893	2.141	1.508	1.013	0.47
SRSF5	HRS | SFRS5 | SRP40 | SRp40 | Sfrs5 | hrs | sfrs5 | srp40	novel transcript reconstruction	.	undetermined	protein-coding	serine/arginine-rich splicing factor 5	unknown	unknown	unknown	321.312	357.003	390.851	163.195	164.923	110.134	153.872	80.579
ENSOARG00000017508	.	ENSOARG00000017508	101102096	20:29179938-29180801:+1	protein-coding	.	structural constituent of ribosome (GO:0003735)	translation (GO:0006412)	intracellular (GO:0005622) | small ribosomal subunit (GO:0015935) | intracellular ribonucleoprotein complex (GO:0030529) | cytoplasm (GO:0005737) | ribosome (GO:0005840)	390.421	359.045	376.74	160.963	149.638	212.916	152.65	261.237
ITIH4	GP120 | H4P | IHRP | ITI-HC4 | ITIHL1 | Itih-4 | PK-120 | PK120	ENSOARG00000000729	101108959	19:48037537-48056296:+1	protein-coding	inter-alpha-trypsin inhibitor heavy chain family member 4	protein binding (GO:0005515) | serine-type endopeptidase inhibitor activity (GO:0004867)	response to cytokine (GO:0034097) | hyaluronan metabolic process (GO:0030212) | acute-phase response (GO:0006953) | negative regulation of endopeptidase activity (GO:0010951)	blood microparticle (GO:0072562) | cytoplasm (GO:0005737) | plasma membrane (GO:0005886) | extracellular exosome (GO:0070062)	246.453	389.517	268.823	45.846	35.028	11.722	38.187	3.553
IDH3B	C78231 | H-IDHB | IDH1 | IDH3 | RP46 | zgc:86647	ENSOARG00000006341	101104080	13:51851446-51856015:+1	protein-coding	isocitrate dehydrogenase 3 (NAD(+)) beta	oxidoreductase activity, acting on the CH-OH group of donors, NAD or NADP as acceptor (GO:0016616) | metal ion binding (GO:0046872) | magnesium ion binding (GO:0000287) | isocitrate dehydrogenase (NAD+) activity (GO:0004449) | NAD binding (GO:0051287) | oxidoreductase activity (GO:0016491)	tricarboxylic acid cycle (GO:0006099) | oxidation-reduction process (GO:0055114)	nucleus (GO:0005634) | mitochondrion (GO:0005739)	54.698	59.915	102.604	365.427	338.056	334.481	389.452	305.859
ZNF706	HSPC038 | PNAS-106 | PNAS-113 | zgc:92624	ENSOARG00000018582	101102740	9:75783370-75786047:+1	protein-coding	zinc finger protein 706	unknown	negative regulation of stem cell population maintenance (GO:1902455) | negative regulation of transcription, DNA-templated (GO:0045892)	nucleus (GO:0005634) | cytoplasm (GO:0005737)	348.556	384.02	366.524	134.626	150.327	141.47	129.363	323.115
EGFL7	NEU1 | VE-STATIN | VE-statin | ZNEU1 | Zneu1 | xegfl7 | zgc:136669 | zgc:152804 | zneu1	ENSOARG00000003778	.	3:2733290-2735571:-1	protein-coding	EGF like domain multiple 7	protein binding (GO:0005515)	positive regulation of endothelial cell proliferation (GO:0001938) | negative regulation of Notch signaling pathway (GO:0045746)	extracellular matrix (GO:0031012)	257.519	383.674	318.713	101.654	136.642	73.885	63.07	42.73
FABP3	FABP | FABP-3 | FABP11 | Fabph-1 | Fabph-4 | Fabph1 | Fabph4 | H-FABP | HFABP | M-FABP | MDGI | Mdgi | O-FABP | cb889 | fabp11 | h-fabp | mdgi | o-fabp	ENSOARG00000001603	100913166	2:235135457-235145925:+1	protein-coding	fatty acid binding protein 3	lipid binding (GO:0008289) | protein binding (GO:0005515) | cytoskeletal protein binding (GO:0008092) | transporter activity (GO:0005215) | long-chain fatty acid binding (GO:0036041) | oleic acid binding (GO:0070538)	transport (GO:0006810)	extracellular space (GO:0005615) | extracellular exosome (GO:0070062)	4.052	4.275	44.174	114.418	82.435	241.829	382.798	324.979
RBM3	2600016C11Rik | IS1-RNPL | RNPL	ENSOARG00000012250	101110819	X:53214367-53216953:-1	protein-coding	RNA binding motif (RNP1, RRM) protein 3	protein binding (GO:0005515) | nucleic acid binding (GO:0003676) | poly(A) RNA binding (GO:0044822) | nucleotide binding (GO:0000166)	unknown	nucleolus (GO:0005730) | nucleoplasm (GO:0005654)	313.692	382.245	296.144	224.656	203.834	109.996	146.408	82.593
FAM162A	2310056P07Rik | C3orf28 | E2IG5 | HGTD-P | fam162b | fb08c12 | wu:fb08c12 | zgc:162943	ENSOARG00000020132	101113293	1:185084260-185123825:+1	protein-coding	family with sequence similarity 162 member A	protein binding (GO:0005515)	positive regulation of apoptotic process (GO:0043065) | positive regulation of release of cytochrome c from mitochondria (GO:0090200) | cellular response to hypoxia (GO:0071456) | obsolete transformed cell apoptotic process (GO:0006927) | activation of cysteine-type endopeptidase activity involved in apoptotic process (GO:0006919) | neuron apoptotic process (GO:0051402)	cytoplasm (GO:0005737) | mitochondrion (GO:0005739) | extracellular exosome (GO:0070062)	86.685	93.927	122.894	171.232	177.911	381.396	235.147	321.465
SDC2	4833414L08Rik | AA960457 | CD362 | HSPG | HSPG1 | Hspg1 | SYND2 | Synd2 | Syndecan-2 | cb440 | hspg | hspg1 | synd2 | syndecan-2 | zgc:103676	ENSOARG00000004813	101108398	9:80189588-80207192:-1	protein-coding	syndecan 2	PDZ domain binding (GO:0030165) | protein binding (GO:0005515)	regulation of dendrite morphogenesis (GO:0048814)	integral component of membrane (GO:0016021) | membrane (GO:0016020)	331.486	304.747	381.064	39.972	68.102	13.841	18.813	20.333
TCEAL8	3930402F23Rik | UR-NR#1 | WEX3	ENSOARG00000000378	.	X:122038906-122039483:+1	protein-coding	transcription elongation factor A like 8	unknown	unknown	unknown	379.15	380.746	341.407	279.921	290.664	165.999	255.481	103.279
ENSOARG00000005814	.	ENSOARG00000005814	.	22:15996222-16019181:-1	protein-coding	.	protein binding (GO:0005515) | metal ion binding (GO:0046872) | zinc ion binding (GO:0008270)	unknown	cytoskeleton (GO:0005856)	198.697	368.758	267.665	266.462	289.538	380.242	197.946	330.761
RPL13 (assigned to ENSOARG00000003957)	.	ENSOARG00000003957	.	11:13771903-13772896:-1	protein-coding	60S ribosomal protein L13	structural constituent of ribosome (GO:0003735)	translation (GO:0006412)	intracellular (GO:0005622) | intracellular ribonucleoprotein complex (GO:0030529) | ribosome (GO:0005840)	338.16	379.272	357.687	131.592	139.283	191.711	124.569	264.374
POLR2K	ABC10-alpha | MafY | Mt1a | RPABC4 | RPB10alpha | RPB12 | RPB7.0 | abc10-alpha | hRPB7.0 | hrpb7.0 | hsRPB10a | hsrpb10a | rpabc4 | rpb10alpha | rpb12 | rpb7.0 | zgc:171795	ENSOARG00000001480	.	9:76826125-76827336:-1	protein-coding	polymerase (RNA) II subunit K	DNA-directed RNA polymerase activity (GO:0003899) | DNA binding (GO:0003677)	transcription, DNA-templated (GO:0006351) | transcription from RNA polymerase II promoter (GO:0006366)	DNA-directed RNA polymerase II, core complex (GO:0005665) | nucleus (GO:0005634)	363.935	379.213	361.41	266.267	283.387	165.225	282.93	189.622
AK1	AK | Ak 1 | Ak-1 | B430205N08Rik | DDBDRAFT_0184264 | DDBDRAFT_0220120 | DDB_0184264 | DDB_0220120 | HTL-S-58j | Myokinase | ak5 | zgc:91930	ENSOARG00000011321	100302085	3:8260726-8268916:+1	protein-coding	adenylate kinase isoenzyme 1	ATP binding (GO:0005524) | nucleobase-containing compound kinase activity (GO:0019205) | transferase activity (GO:0016740) | nucleoside diphosphate kinase activity (GO:0004550) | kinase activity (GO:0016301) | adenylate kinase activity (GO:0004017)	nucleobase-containing compound metabolic process (GO:0006139) | cell cycle arrest (GO:0007050) | phosphorylation (GO:0016310) | nucleoside diphosphate phosphorylation (GO:0006165) | nucleoside triphosphate biosynthetic process (GO:0009142) | ATP metabolic process (GO:0046034)	outer dense fiber (GO:0001520) | sperm flagellum (GO:0036126) | cytoplasm (GO:0005737) | plasma membrane (GO:0005886) | extracellular exosome (GO:0070062)	29.395	27.313	43.985	65.639	64.737	52.204	101.373	379.145
ENSOARG00000017448	.	ENSOARG00000017448	.	5:48780105-48781798:+1	protein-coding	Uncharacterized protein	unknown	unknown	unknown	156.009	230.934	177.661	93.132	93.402	86.593	85.526	378.89
PAIP2	2310050K10Rik | AU045972 | AYCPI006445 | CG12358 | Dmel\CG12358 | GB12412 | Matrin-3 | PAIP-2 | PAIP2A | dPaip2 | paip2	ENSOARG00000017013	101114440	5:48033227-48036848:+1	protein-coding	poly(A) binding protein interacting protein 2	protein binding (GO:0005515) | translation repressor activity (GO:0030371) | mRNA binding (GO:0003729)	negative regulation of translational initiation (GO:0045947) | regulation of long-term synaptic potentiation (GO:1900271) | memory (GO:0007613) | negative regulation of translation (GO:0017148) | spermatogenesis (GO:0007283) | regulation of translation (GO:0006417)	cytoplasm (GO:0005737)	298.334	283.817	322.896	334.545	378.858	295.717	302.53	217.881
CD59	16.3A5 | 1F5 | CIP | Cd59a | Cd59b | EJ16 | EJ30 | EL32 | G344 | HRF-20 | HRF20 | MAC-IP | MACIF | MACIP | MEM43 | MIC11 | MIN1 | MIN2 | MIN3 | MIRL | MSK21 | Protectin | QmoA-10351 | QnpA-17056 | ej16 | ej30 | el32 | fj38b04 | g344 | hrf-20 | hrf20 | lndc1 | ly6/neurotoxin like | mac-ip | p18-20 | wu:fj38b04	ENSOARG00000017909	101102670	15:62538805-62552821:-1	protein-coding	CD59 molecule	protein binding (GO:0005515)	negative regulation of activation of membrane attack complex (GO:0001971)	extracellular space (GO:0005615) | focal adhesion (GO:0005925) | cell surface (GO:0009986) | anchored component of external side of plasma membrane (GO:0031362) | vesicle (GO:0031982) | extracellular exosome (GO:0070062)	378.286	371.316	307.686	177.335	182.778	113.926	122.033	140.368
TAGLN	SM22 | SM22A | SMCC | Sm22 | Sm22a | TAGL | TAGLN1 | WS3-10 | Ws310 | sm22 | smcc | tagln1 | ws3-10 | zgc:153186	ENSOARG00000004174	101118555	15:27382416-27383822:+1	protein-coding	transgelin	protein binding (GO:0005515) | actin filament binding (GO:0051015)	epithelial cell differentiation (GO:0030855)	unknown	376.144	268.078	166.671	84.001	100.412	60.27	48.226	73.171
PPIB	AA408962 | AA553318 | AGR_C_3088 | AGR_C_3090 | AI844835 | BB253_1782 | BPP5_1436 | CYCLOPHILIN B | CYP-5 | CYP-S1 | CYPB | Cphn-2 | Cphn2 | CyP-20b | CypB | ECK0518 | GB12089 | HEL-S-39 | JW0514 | LA2535 | OI9 | PSPTO3744 | Pro0025 | Pro0942 | Pro1252 | SCYLP | Scylp | VF1601 | cb87 | cyp-s1 | cypb | ppi | sb:cb87 | scylp | wu:fa97f08 | zgc:73214 | zgc:86796	ENSOARG00000020749	554319	7:42899182-42905385:+1	protein-coding	peptidylprolyl isomerase B	protein binding (GO:0005515) | isomerase activity (GO:0016853) | poly(A) RNA binding (GO:0044822) | RNA polymerase binding (GO:0070063) | peptidyl-prolyl cis-trans isomerase activity (GO:0003755)	chaperone-mediated protein folding (GO:0061077) | protein folding (GO:0006457) | positive regulation by host of viral genome replication (GO:0044829) | positive regulation of multicellular organism growth (GO:0040018) | bone development (GO:0060348) | positive regulation by host of viral process (GO:0044794) | protein stabilization (GO:0050821) | protein peptidyl-prolyl isomerization (GO:0000413)	endoplasmic reticulum chaperone complex (GO:0034663) | nucleus (GO:0005634) | focal adhesion (GO:0005925) | membrane (GO:0016020) | endoplasmic reticulum (GO:0005783) | perinuclear region of cytoplasm (GO:0048471) | extracellular exosome (GO:0070062)	375.846	340.725	304.369	116.481	121.009	71.994	71.553	44.897
ENSOARG00000015163	.	ENSOARG00000015163	105601842	17:29186272-29186766:-1	protein-coding	Uncharacterized protein	isomerase activity (GO:0016853) | peptidyl-prolyl cis-trans isomerase activity (GO:0003755)	protein folding (GO:0006457) | protein peptidyl-prolyl isomerization (GO:0000413)	unknown	308.399	375.252	283.355	117.021	162.714	74.65	95.09	36.28
ENSOARG00000011916	.	ENSOARG00000011916	101112071	10:30583831-30588285:+1	protein-coding	Uncharacterized protein	DNA binding (GO:0003677)	unknown	nucleus (GO:0005634)	345.649	373.925	331.958	199.541	231.996	239.769	167.532	223.119
CLIC1	Clcp | G6 | NCC27 | ncc27 | wu:fc30e04 | xclic1 | zgc:77044	ENSOARG00000005464	101118140	20:26713897-26718853:+1	protein-coding	chloride intracellular channel 1	protein binding (GO:0005515) | voltage-gated ion channel activity (GO:0005244) | chloride channel activity (GO:0005254)	platelet aggregation (GO:0070527) | transport (GO:0006810) | ion transport (GO:0006811) | chloride transmembrane transport (GO:1902476) | regulation of ion transmembrane transport (GO:0034765) | regulation of cell cycle (GO:0051726) | chloride transport (GO:0006821) | regulation of mitochondrial membrane potential (GO:0051881) | positive regulation of osteoblast differentiation (GO:0045669)	nuclear envelope (GO:0005635) | extracellular space (GO:0005615) | vesicle (GO:0031982) | membrane (GO:0016020) | extracellular exosome (GO:0070062) | blood microparticle (GO:0072562) | nucleus (GO:0005634) | chloride channel complex (GO:0034707) | cytoplasm (GO:0005737) | perinuclear region of cytoplasm (GO:0048471) | mitochondrion (GO:0005739)	275.83	373.705	243.919	59.015	66.893	46.41	31.99	39.629
EPYC	DSPG3 | Dspg3 | PG-Lb | PGLB | Pg-Lb | SLRR3B | dspg3 | im:6901189 | si:dkeyp-38g8.4 | wu:fb48c08 | zgc:110596	ENSOARG00000015702	101112468	3:127257338-127295253:-1	protein-coding	epiphycan	unknown	unknown	unknown	371.823	8.624	12.487	2.296	43.006	23.257	0.652	0.569
NDUFA5/ENSOARG:00717 (assigned to ENSOARG00000000717)	.	ENSOARG00000000717	.	4:87868028-87883164:-1	protein-coding	NADH:ubiquinone oxidoreductase subunit A5	oxidoreductase activity, acting on NAD(P)H (GO:0016651)	respiratory electron transport chain (GO:0022904)	mitochondrial inner membrane (GO:0005743)	62.036	62.237	80.35	313.997	323.863	371.369	354.275	318.243
SERPINH1	AsTP3 | BERF-1 | CBP1 | CBP2 | Cbp1 | Cbp2 | Gp50 | HSP47 | Hsp47 | J6 | OI10 | PIG14 | PPROM | RA-A47 | SERPINH2 | Serpinh2 | astp3 | cbp1 | cbp2 | gp46 | hsp47 | pig14 | pprom | ra-a47 | serpinh2	ENSOARG00000011824	101109208	15:52925655-52931691:+1	protein-coding	serpin family H member 1	protein binding (GO:0005515) | poly(A) RNA binding (GO:0044822) | unfolded protein binding (GO:0051082)	collagen biosynthetic process (GO:0032964) | protein maturation (GO:0051604) | chondrocyte development involved in endochondral bone morphogenesis (GO:0003433) | collagen fibril organization (GO:0030199)	endoplasmic reticulum-Golgi intermediate compartment (GO:0005793) | extracellular space (GO:0005615) | membrane raft (GO:0045121) | cytoplasm (GO:0005737) | endoplasmic reticulum (GO:0005783) | extracellular exosome (GO:0070062)	370.765	354.254	297.816	75.492	93.269	58.777	53.393	62.337
PMP22	22-KD PEROXISOMAL MEMBRANE PROTEIN | 22kDa | CMT1A | CMT1E | DSS | GAS-3 | GAS3 | Gas-3 | HMSNIA | HNPP | Sp110 | T26N6.9 | T26N6_9 | Tr | cmt1a | cmt1e | dss | gas-3 | hmsnia | hnpp | sp110 | trembler	ENSOARG00000016485	100302348	11:32318382-32341045:-1	protein-coding	peripheral myelin protein 22	protein binding (GO:0005515)	cell death (GO:0008219) | bleb assembly (GO:0032060)	integral component of membrane (GO:0016021) | plasma membrane (GO:0005886) | membrane (GO:0016020)	370.757	345.969	253.019	38.322	44.55	24.436	21.295	53.191
COL6A1	AI747156 | BTHLM1 | Col6a-1 | OPLL | RGD1565398 | UCHMD1	ENSOARG00000012810	101111927	1:263809116-263828452:+1	protein-coding	collagen type VI alpha 1	platelet-derived growth factor binding (GO:0048407)	osteoblast differentiation (GO:0001649) | protein heterotrimerization (GO:0070208) | endodermal cell differentiation (GO:0035987) | cellular response to amino acid stimulus (GO:0071230)	lysosomal membrane (GO:0005765) | protein complex (GO:0043234) | proteinaceous extracellular matrix (GO:0005578) | extracellular matrix (GO:0031012) | membrane (GO:0016020) | extracellular region (GO:0005576) | extracellular exosome (GO:0070062) | sarcolemma (GO:0042383)	370.581	285.485	251.511	84.399	69.238	83.525	57.717	98.849
RCAN1	ADAPT78 | Adapt78 | CALP1L | CSP1 | DSC1 | DSCR1 | Dscr1 | MCIP1 | Mcip1 | RCN1 | adapt78 | csp1 | dsc1 | dscr1 | mcip1 | rcn1	ENSOARG00000012673	443255	1:119195553-119205035:+1	protein-coding	regulator of calcineurin 1	unknown	calcium-mediated signaling (GO:0019722)	unknown	197.206	370.487	187.075	26.963	31.985	36.663	13.153	174.265
ENSOARG00000017015	.	ENSOARG00000017015	101115901	10:32569072-32569377:-1	protein-coding	HSP10; Uncharacterized protein	ATP binding (GO:0005524)	protein folding (GO:0006457)	cytoplasm (GO:0005737)	260.869	278.898	264.152	230.993	281.596	306.498	274.215	369.765
ENSOARG00000009527	.	ENSOARG00000009527	.	8:23643674-23645782:-1	protein-coding	.	calmodulin binding (GO:0005516)	unknown	unknown	229.674	238.047	368.275	60.913	82.453	44.618	44.755	30.187
ENSOARG00000001568	.	ENSOARG00000001568	101123159	20:26463053-26475301:-1	protein-coding	Uncharacterized protein	endopeptidase inhibitor activity (GO:0004866)	negative regulation of endopeptidase activity (GO:0010951)	extracellular space (GO:0005615)	367.838	219.797	175.671	44.973	47.515	6.698	7.584	1.534
COL6A2	BTHLM1 | Col6a-2 | PP3610 | UCMD1 | colVIA2	ENSOARG00000012880	.	1:263959138-263975267:+1	protein-coding	collagen type VI alpha 2	protein binding (GO:0005515)	protein heterotrimerization (GO:0070208)	protein complex (GO:0043234) | extracellular space (GO:0005615) | proteinaceous extracellular matrix (GO:0005578) | extracellular matrix (GO:0031012) | extracellular vesicle (GO:1903561) | extracellular region (GO:0005576) | extracellular exosome (GO:0070062) | sarcolemma (GO:0042383)	365.939	271.491	263.385	87.572	80.742	66.264	49.92	90.478
AEBP1	ACLP | AEBP1L | aclp | fc06f06 | si:dkey-24n17.4 | wu:fc06f06	ENSOARG00000016204	.	4:77244620-77254115:-1	protein-coding	AE binding protein 1	metallocarboxypeptidase activity (GO:0004181) | carboxypeptidase activity (GO:0004180) | transcription corepressor activity (GO:0003714) | transcriptional repressor activity, RNA polymerase II transcription regulatory region sequence-specific binding (GO:0001227) | RNA polymerase II regulatory region sequence-specific DNA binding (GO:0000977) | zinc ion binding (GO:0008270)	negative regulation of transcription from RNA polymerase II promoter (GO:0000122) | regulation of transcription, DNA-templated (GO:0006355) | proteolysis (GO:0006508)	extracellular space (GO:0005615) | extracellular matrix (GO:0031012) | extracellular exosome (GO:0070062)	363.789	227.526	207.94	27.85	30.342	7.116	6.791	8.056
C12orf57	.	ENSOARG00000005133	101108904	3:207470552-207471945:-1	protein-coding	chromosome 12 open reading frame 57	unknown	unknown	unknown	350.441	345.074	362.568	132.913	139.026	79.301	97.028	57.209
ENSOARG00000005542	.	ENSOARG00000005542	101103196	21:49324530-49327337:-1	protein-coding	Uncharacterized protein	structural constituent of ribosome (GO:0003735)	translational elongation (GO:0006414)	intracellular (GO:0005622) | intracellular ribonucleoprotein complex (GO:0030529) | ribosome (GO:0005840)	362.323	359.301	341.502	146.679	156.003	137.74	137.458	147.81
KDELR3	AI173274 | ERD2 | ERD2L3 | erd2l3 | kdelr | kdelr1 | zgc:64171	ENSOARG00000015413	.	3:214141250-214150500:+1	protein-coding	KDEL endoplasmic reticulum protein retention receptor 3	ER retention sequence binding (GO:0046923)	protein retention in ER lumen (GO:0006621) | transport (GO:0006810) | protein transport (GO:0015031)	integral component of membrane (GO:0016021) | endoplasmic reticulum membrane (GO:0005789) | membrane (GO:0016020) | endoplasmic reticulum (GO:0005783)	330.024	350.976	361.317	159.299	174.364	142.411	142.456	105.646
FXYD6	0610030I18Rik | Php | si:dkey-36i7.1 | wu:fi25c12 | zgc:63716	ENSOARG00000007061	.	15:27987868-27990954:-1	protein-coding	Uncharacterized protein	ion channel activity (GO:0005216) | protein binding (GO:0005515)	ion transmembrane transport (GO:0034220) | ion transport (GO:0006811)	plasma membrane (GO:0005886) | membrane (GO:0016020)	333.359	359.174	297.678	46.054	49.029	13.931	28.735	9.576
CASQ2	AA033488 | AW146219 | CAL | CASQ1 | Csq2 | ESTM52 | PDIB2 | cCSQ | cardCSQ | pdib2 | wu:fa02h03 | zgc:86817	ENSOARG00000020163	101105292	1:92171986-92243108:-1	protein-coding	calsequestrin 2	protein binding (GO:0005515) | calcium ion binding (GO:0005509) | calcium-dependent protein binding (GO:0048306)	regulation of cell communication by electrical coupling (GO:0010649) | negative regulation of ryanodine-sensitive calcium-release channel activity (GO:0060315) | cellular response to caffeine (GO:0071313) | negative regulation of potassium ion transport (GO:0043267) | regulation of release of sequestered calcium ion into cytosol by sarcoplasmic reticulum (GO:0010880) | protein polymerization (GO:…	intracellular (GO:0005622) | junctional membrane complex (GO:0030314) | sarcoplasmic reticulum lumen (GO:0033018) | cytoplasm (GO:0005737) | Z disc (GO:0030018)	1.173	0.247	61.654	341.653	356.566	321.105	304.418	29.331
JUN	AP-1 | AP1 | C-JUN | JunA | Junc | c-JUN | c-Jun | c-jun | c-junl | fj36h07 | wu:fj36h07 | zgc:65863	ENSOARG00000009999	443219	1:33248219-33249157:-1	protein-coding	Jun proto-oncogene, AP-1 transcription factor subunit	RNA polymerase II activating transcription factor binding (GO:0001102) | R-SMAD binding (GO:0070412) | transcription factor binding (GO:0008134) | identical protein binding (GO:0042802) | sequence-specific DNA binding (GO:0043565) | transcription coactivator activity (GO:0003713) | RNA polymerase II distal enhancer sequence-specific DNA binding (GO:0000980) | GTPase activator activity (GO:0005096…	positive regulation of ERK1 and ERK2 cascade (GO:0070374) | positive regulation of endothelial cell proliferation (GO:0001938) | positive regulation of transcription from RNA polymerase II promoter (GO:0045944) | response to drug (GO:0042493) | response to muscle stretch (GO:0035994) | angiogenesis (GO:0001525) | transcription, DNA-templated (GO:0006351) | eyelid development in camera-type eye (G…	transcription factor complex (GO:0005667) | nucleus (GO:0005634) | transcriptional repressor complex (GO:0017053) | nucleoplasm (GO:0005654) | nuclear euchromatin (GO:0005719)	167.175	247.225	356.429	120.323	138.411	63.449	40.041	161.949
S100A14	1110013O05Rik | BCMP84 | S100A15 | S100a15 | S114	ENSOARG00000002406	101111615	AMGL01123244.1:11354-12328:+1	protein-coding	S100 calcium binding protein A14	protein binding (GO:0005515) | calcium ion binding (GO:0005509) | chemokine receptor binding (GO:0042379)	positive regulation of monocyte chemotaxis (GO:0090026) | defense response to bacterium (GO:0042742) | positive regulation of granulocyte chemotaxis (GO:0071624) | response to lipopolysaccharide (GO:0032496) | toll-like receptor 4 signaling pathway (GO:0034142)	microtubule cytoskeleton (GO:0015630) | cytoplasm (GO:0005737) | cell junction (GO:0030054) | plasma membrane (GO:0005886) | perinuclear region of cytoplasm (GO:0048471) | nucleoplasm (GO:0005654) | extracellular exosome (GO:0070062)	266.582	204.161	251.146	74.137	74.497	49.681	33.628	355.579
HSPA5	AL022860 | AU019543 | BIP | BiP | Bip | D2Wsu141e | D2Wsu17e | GRP-78 | GRP78 | Grp78 | HEL-S-89n | Hsce70 | MIF2 | SEZ-7 | Sez7 | XAP-1 | baffled | cb865 | fb60h09 | fi36d04 | grp78 | hspa5a | mBiP | wu:fb60h09 | wu:fi36d04 | zgc:55994 | zgc:77606	ENSOARG00000012928	780447	3:10721674-10725535:+1	protein-coding	heat shock protein family A (Hsp70) member 5	protein binding (GO:0005515) | misfolded protein binding (GO:0051787) | glycoprotein binding (GO:0001948) | nucleotide binding (GO:0000166) | enzyme binding (GO:0019899) | ATP binding (GO:0005524) | ubiquitin protein ligase binding (GO:0031625) | ribosome binding (GO:0043022) | ATPase activity (GO:0016887) | protein domain specific binding (GO:0019904)	negative regulation of apoptotic process (GO:0043066) | proteolysis involved in cellular protein catabolic process (GO:0051603) | negative regulation of transforming growth factor beta receptor signaling pathway (GO:0030512) | activation of signaling protein activity involved in unfolded protein response (GO:0006987) | cerebellar Purkinje cell layer development (GO:0021680) | cellular response to…	integral component of endoplasmic reticulum membrane (GO:0030176) | midbody (GO:0030496) | cell surface (GO:0009986) | plasma membrane (GO:0005886) | membrane (GO:0016020) | endoplasmic reticulum (GO:0005783) | extracellular exosome (GO:0070062) | myelin sheath (GO:0043209) | endoplasmic reticulum chaperone complex (GO:0034663) | endoplasmic reticulum-Golgi intermediate compartment (GO:0005793) |…	312.03	355.224	225.06	108.043	114.712	127.144	75.573	74.876
CCL2	AI323594 | GDCF-2 | HC11 | HSMCR30 | JE | MCAF | MCP-1 | MCP-1A | MCP1 | MCP1A | SCY2 | SCYA2 | SMC-CF | Scya2 | Sigje	ENSOARG00000009627	.	11:15505826-15507249:-1	protein-coding	C-C motif chemokine ligand 2	protein binding (GO:0005515) | chemokine activity (GO:0008009) | CCR2 chemokine receptor binding (GO:0031727) | cytokine activity (GO:0005125) | G-protein coupled receptor binding (GO:0001664)	inflammatory response (GO:0006954) | protein kinase B signaling (GO:0043491) | cytoskeleton organization (GO:0007010) | negative regulation of natural killer cell chemotaxis (GO:2000502) | negative regulation of glial cell apoptotic process (GO:0034351) | immune response (GO:0006955) | positive regulation of T cell activation (GO:0050870) | cytokine-mediated signaling pathway (GO:0019221) | cellu…	extracellular space (GO:0005615) | extracellular region (GO:0005576)	355.21	239.406	62.7	49.044	44.782	27.639	30.811	26.601
RPS27L	1810034D23Rik	ENSOARG00000020791	.	7:43920350-43922710:+1	protein-coding	ribosomal protein S27 like	translation activator activity (GO:0008494) | protein binding (GO:0005515) | metal ion binding (GO:0046872) | poly(A) RNA binding (GO:0044822) | cysteine-type endopeptidase activator activity involved in apoptotic process (GO:0008656) | structural constituent of ribosome (GO:0003735)	intrinsic apoptotic signaling pathway in response to DNA damage by p53 class mediator (GO:0042771) | translation (GO:0006412) | DNA repair (GO:0006281) | mitotic G1 DNA damage checkpoint (GO:0031571) | cellular response to DNA damage stimulus (GO:0006974)	intracellular (GO:0005622) | nucleus (GO:0005634) | intracellular ribonucleoprotein complex (GO:0030529) | ribosome (GO:0005840)	306.159	354.767	262.58	129.149	164.112	206.755	154.726	209.347
ENSOARG00000010652	.	ENSOARG00000010652	.	24:7097294-7097770:-1	protein-coding	Uncharacterized protein	unknown	unknown	unknown	350.854	343.949	353.975	129.245	134.794	147.164	109.145	117.932
ENSOARG00000013891	.	ENSOARG00000013891	101122294	12:73700588-73737242:-1	protein-coding	Membrane cofactor protein	unknown	single fertilization (GO:0007338)	cell surface (GO:0009986) | membrane (GO:0016020) | inner acrosomal membrane (GO:0002079)	149.812	353.135	171.511	23.447	28.51	25.728	14.911	22.773
RRAD	RAD | RAD1 | REM3 | Rad | ZGC:63471 | fi06a10 | gem | rad | rad1 | rem3 | wu:fi06a10 | zgc:63471	ENSOARG00000002486	101105434	14:33974653-33977376:-1	protein-coding	RRAD, Ras related glycolysis inhibitor and calcium channel regulator	protein binding (GO:0005515) | nucleotide binding (GO:0000166) | GTP binding (GO:0005525)	small GTPase mediated signal transduction (GO:0007264) | signal transduction (GO:0007165) | protein transport (GO:0015031)	intracellular (GO:0005622) | membrane (GO:0016020)	84.652	162.323	150.242	180.713	208.715	221.718	352.925	85.268
GTF2H5	2700017P07Rik | 2810432H05Rik | C6orf175 | D17Wsu155e | DDBDRAFT_0190660 | DDBDRAFT_0266451 | DDB_0190660 | DDB_0266451 | RGD1560991 | TF2H5 | TFB5 | TFIIH | TGF2H5 | TTD | TTD-A | TTD3 | TTDA | bA120J8.2 | ba120j8.2 | si:dkey-12h9.4 | tf2h5 | tfb5 | tgf2h5 | ttd | ttd-a | ttda | zgc:153434	ENSOARG00000004345	.	8:81357231-81368412:+1	protein-coding	general transcription factor IIH subunit 5	rDNA binding (GO:0000182)	transcription elongation from RNA polymerase I promoter (GO:0006362) | cellular response to gamma radiation (GO:0071480) | regulation of transcription, DNA-templated (GO:0006355) | nucleotide-excision repair (GO:0006289) | rRNA processing (GO:0006364) | nucleotide-excision repair, preincision complex assembly (GO:0006294)	core TFIIH complex (GO:0000439) | nucleolus (GO:0005730)	342.604	351.626	321.264	232.889	238.162	179.944	263.691	183.545
ENSOARG00000004866	.	ENSOARG00000004866	.	17:71560278-71560370:+1	protein-coding	.	unknown	unknown	unknown	102.933	124.884	126.077	119.63	134.018	238.077	130.553	351.141
HSPE1	10kDa | CPN10 | Cpn10 | EPF | GROES | HSP10 | Hsp10 | MOB4 | MOBKL3 | PREI3 | cpn10 | hsp10 | mt-cpn10 | zgc:86747	ENSOARG00000015545	.	2:198721727-198723054:+1	protein-coding	heat shock protein family E (Hsp10) member 1	chaperone binding (GO:0051087) | ATP binding (GO:0005524) | protein binding (GO:0005515) | poly(A) RNA binding (GO:0044822)	osteoblast differentiation (GO:0001649) | protein folding (GO:0006457)	cytoplasm (GO:0005737) | membrane (GO:0016020) | mitochondrion (GO:0005739) | extracellular exosome (GO:0070062)	217.044	204.109	208.596	214.266	235.743	260.409	261.502	350.867
NDUFS4	6720411N02Rik | AQDQ | Aqdq | C1-18k | CI-18 | CI-18 kDa | CI-AQDQ | DDBDRAFT_0237483 | DDB_0237483 | GB16917 | NDUS4 | zgc:112289	ENSOARG00000008081	101118899	16:25456014-25569438:-1	protein-coding	NADH:ubiquinone oxidoreductase subunit S4	oxidoreductase activity, acting on NAD(P)H (GO:0016651) | NADH dehydrogenase (ubiquinone) activity (GO:0008137)	response to cAMP (GO:0051591) | electron transport chain (GO:0022900) | brain development (GO:0007420) | cellular respiration (GO:0045333) | reactive oxygen species metabolic process (GO:0072593) | regulation of protein phosphorylation (GO:0001932) | positive regulation of fibroblast proliferation (GO:0048146) | mitochondrial respiratory chain complex I assembly (GO:0032981) | cAMP-mediated signa…	mitochondrial respiratory chain complex I (GO:0005747) | mitochondrion (GO:0005739)	97.029	112.094	134.268	288.814	326.77	265.23	350.303	247.411
SSR2	1500032E05Rik | AI315033 | AU020133 | DDBDRAFT_0206509 | DDBDRAFT_0266464 | DDB_0206509 | DDB_0266464 | HSD25 | LeSSR2 | SSR-beta | SSRB | TLAP | TRAP-BETA | TRAP-beta | TRAPB | TRAP[b] | TRAPb | TRAPbeta | gp25H | wu:fb75b04 | zgc:92180	ENSOARG00000005196	101122235	1:104609520-104616269:-1	protein-coding	signal sequence receptor subunit 2	unknown	unknown	integral component of membrane (GO:0016021) | endoplasmic reticulum membrane (GO:0005789) | membrane (GO:0016020) | endoplasmic reticulum (GO:0005783)	327.19	350.117	310.316	103.718	107.477	97.983	88.015	85.228
MAP1LC3A	1010001H21Rik | 4922501H04Rik | ATG8E | LC3 | LC3A | LC3a | MAP1ALC3 | MAP1BLC3 | MLP3A | atg8e | lc3 | lc3a | map1alc3 | map1blc3 | zgc:77094	ENSOARG00000009989	101118292	13:63487401-63488149:+1	protein-coding	microtubule associated protein 1 light chain 3 alpha	protein binding (GO:0005515) | ubiquitin protein ligase binding (GO:0031625) | phospholipid binding (GO:0005543) | phosphatidylethanolamine binding (GO:0008429)	autophagosome assembly (GO:0000045) | mitophagy (GO:0000422) | autophagy (GO:0006914)	autophagosome (GO:0005776) | cytosol (GO:0005829) | autophagosome membrane (GO:0000421) | cytoplasm (GO:0005737) | organelle membrane (GO:0031090)	258.494	349.502	293.767	220.161	239.172	155.975	223.458	117.916
CLIC4	CLIC4L | D0Jmb3 | H1 | MTCLIC | TU-74 | cb142 | huH1 | mc3s5 | mtCLIC | p64H1 | wu:fb33c05 | wu:fc30h10 | xclic4	ENSOARG00000006435	101115514	2:241007048-241085278:-1	protein-coding	chloride intracellular channel 4	voltage-gated ion channel activity (GO:0005244) | protein binding (GO:0005515) | chloride channel activity (GO:0005254)	ion transport (GO:0006811) | negative regulation of cell migration (GO:0030336) | multicellular organism growth (GO:0035264) | chloride transmembrane transport (GO:1902476) | cellular response to calcium ion (GO:0071277) | regulation of ion transmembrane transport (GO:0034765) | angiogenesis (GO:0001525) | endothelial cell morphogenesis (GO:0001886) | branching morphogenesis of an epithelial tube…	nuclear matrix (GO:0016363) | midbody (GO:0030496) | cell surface (GO:0009986) | plasma membrane (GO:0005886) | extracellular exosome (GO:0070062) | microvillus (GO:0005902) | intracellular (GO:0005622) | cytosol (GO:0005829) | cytoplasm (GO:0005737) | perinuclear region of cytoplasm (GO:0048471) | mitochondrion (GO:0005739) | centrosome (GO:0005813) | microtubule cytoskeleton (GO:0015630) | memb…	308.331	348.13	222.165	115.228	131.252	115.853	69.505	45.482
THBD	AHUS6 | AI385582 | BDCA3 | CD141 | THPH12 | THRM | TM | fTM | thrm	ENSOARG00000005117	101103256	13:40956482-40958250:-1	protein-coding	thrombomodulin	protein binding (GO:0005515) | calcium ion binding (GO:0005509) | transmembrane signaling receptor activity (GO:0004888)	negative regulation of blood coagulation (GO:0030195) | signal transduction (GO:0007165) | female pregnancy (GO:0007565)	integral component of membrane (GO:0016021) | cell surface (GO:0009986) | integral component of plasma membrane (GO:0005887)	88.928	347.322	231.716	11.068	7.633	14.617	4.888	8.354
NDUFS2	CI-49 | CI-49kD | GB17868 | NDUS2 | im:7149850 | zgc:112036	ENSOARG00000009782	.	1:110747785-110756501:+1	protein-coding	NADH:ubiquinone oxidoreductase core subunit S2	quinone binding (GO:0048038) | protein binding (GO:0005515) | oxidoreductase activity, acting on NAD(P)H (GO:0016651) | ubiquitin protein ligase binding (GO:0031625) | NADH dehydrogenase activity (GO:0003954) | NAD binding (GO:0051287) | oxidoreductase activity (GO:0016491)	response to oxidative stress (GO:0006979) | oxidation-reduction process (GO:0055114)	mitochondrial respiratory chain complex I (GO:0005747) | nucleoplasm (GO:0005654) | mitochondrion (GO:0005739)	71.471	69.862	98.357	273.891	256.664	347.019	287.732	313.853
RFK	0610038L10Rik | AF031381 | KOI-4 | RIFK | rifk | si:dkey-162f21.5	ENSOARG00000012496	.	2:59861585-59865836:+1	protein-coding	riboflavin kinase	protein binding (GO:0005515) | riboflavin kinase activity (GO:0008531)	riboflavin biosynthetic process (GO:0009231) | reactive oxygen species metabolic process (GO:0072593) | apoptotic process (GO:0006915) | phosphorylation (GO:0016310) | positive regulation of NAD(P)H oxidase activity (GO:0033864)	mitochondrion (GO:0005739)	189.329	345.853	203.32	23.862	32.144	13.322	11.007	14.732
RHOB	AA017882 | ARH6 | ARHB | Arh6 | Arhb | MST081 | MSTP081 | RHO | RHOH6 | arh6 | arhb | rhoh6 | xrhob	ENSOARG00000019441	100158235	3:28196686-28197309:+1	protein-coding	rho-related GTP-binding protein RhoB	protein binding (GO:0005515) | GTPase activity (GO:0003924) | GDP binding (GO:0019003) | nucleotide binding (GO:0000166) | GTP binding (GO:0005525)	positive regulation of angiogenesis (GO:0045766) | cellular response to ionizing radiation (GO:0071479) | endothelial tube morphogenesis (GO:0061154) | regulation of cell migration (GO:0030334) | small GTPase mediated signal transduction (GO:0007264) | positive regulation of endothelial cell migration (GO:0010595) | negative regulation of cell migration (GO:0030336) | protein transport (GO:001503…	cleavage furrow (GO:0032154) | endosome membrane (GO:0010008) | early endosome (GO:0005769) | plasma membrane (GO:0005886) | membrane (GO:0016020) | extracellular exosome (GO:0070062) | intracellular (GO:0005622) | late endosome (GO:0005770) | nucleus (GO:0005634) | focal adhesion (GO:0005925)	196.764	280.44	345.411	107.316	133.986	98.845	89.33	32.121
ACADVL	ACAD6 | LCACD | VLCAD | fb52d04 | vlcad | wu:fb52d04 | wu:fc75e01 | zgc:64067	ENSOARG00000010662	101117173	11:26561092-26570595:+1	protein-coding	acyl-CoA dehydrogenase, very long chain	oxidoreductase activity, acting on the CH-CH group of donors (GO:0016627) | flavin adenine dinucleotide binding (GO:0050660) | acyl-CoA dehydrogenase activity (GO:0003995) | oxidoreductase activity (GO:0016491)	metabolic process (GO:0008152) | epithelial cell differentiation (GO:0030855) | fatty acid beta-oxidation using acyl-CoA dehydrogenase (GO:0033539) | regulation of cholesterol metabolic process (GO:0090181) | temperature homeostasis (GO:0001659) | negative regulation of fatty acid biosynthetic process (GO:0045717) | negative regulation of fatty acid oxidation (GO:0046322) | oxidation-reduction pr…	nucleus (GO:0005634) | mitochondrial nucleoid (GO:0042645) | cytoplasm (GO:0005737) | nucleolus (GO:0005730) | mitochondrion (GO:0005739)	44.104	51.647	76.53	155.175	171.736	304.147	344.56	197.252
SMDT1	1500032L24Rik | C10H22orf32 | C1H22orf32 | C22H22orf32 | C22ORF32 | C22orf32 | C3H22orf32 | C5H22orf32 | C7BH22orf32 | CB4H22orf32 | DDDD | EMRE | Emre | RGD1311310 | c22orf32 | dJ186O1.1	ENSOARG00000018850	.	3:217068276-217070109:+1	protein-coding	single-pass membrane protein with aspartate rich tail 1	unknown	mitochondrial calcium ion homeostasis (GO:0051560) | calcium ion transmembrane import into mitochondrion (GO:0036444) | mitochondrial calcium ion transport (GO:0006851)	nucleus (GO:0005634) | uniplex complex (GO:1990246) | integral component of mitochondrial inner membrane (GO:0031305) | mitochondrion (GO:0005739)	171.299	180.125	209.383	229.715	220.414	268.094	343.032	215.598
ENSOARG00000000660	.	ENSOARG00000000660	.	25:41127437-41128738:+1	protein-coding	Transcription factor BTF3	unknown	unknown	unknown	313.63	315.897	327.242	188.427	198.847	225.027	176.745	342.675
ENSOARG00000017662	.	ENSOARG00000017662	.	AMGL01125833.1:298-549:+1	protein-coding	Uncharacterized protein	oxidoreductase activity, acting on the CH-CH group of donors (GO:0016627) | acyl-CoA dehydrogenase activity (GO:0003995)	oxidation-reduction process (GO:0055114)	unknown	47.032	52.461	85.766	312.815	299.804	274.978	342.38	245.062
PFKM	AI131669 | ATP-PFK | GSD7 | M-PFK | PFK-1 | PFK-A | PFK-M | PFK1 | PFKA | PFKX | PFMK | PPP1R122 | Pfk-4 | Pfk-M | Pfk4 | Pfka | Pfkx | pfk	ENSOARG00000019300	443489	3:138238132-138280543:-1	protein-coding	phosphofructokinase, muscle	protein binding (GO:0005515) | fructose binding (GO:0070061) | phosphofructokinase activity (GO:0008443) | kinase activity (GO:0016301) | protein C-terminus binding (GO:0008022) | nucleotide binding (GO:0000166) | catalytic activity (GO:0003824) | 6-phosphofructokinase activity (GO:0003872) | identical protein binding (GO:0042802) | ATP binding (GO:0005524) | kinase binding (GO:0019900) | transfe…	muscle cell cellular homeostasis (GO:0046716) | glycolysis from storage polysaccharide through glucose-1-phosphate (GO:0093001) | canonical glycolysis (GO:0061621) | carbohydrate phosphorylation (GO:0046835) | fructose 6-phosphate metabolic process (GO:0006002) | metabolic process (GO:0008152) | glycogen catabolic process (GO:0005980) | glycolytic process (GO:0006096) | positive regulation of ins…	6-phosphofructokinase complex (GO:0005945) | sperm principal piece (GO:0097228) | cytosol (GO:0005829) | cytoplasm (GO:0005737) | apical plasma membrane (GO:0016324) | extracellular exosome (GO:0070062)	13.032	11.693	55.286	191.291	218.462	249.327	341.292	308.013
ENSOARG00000005107	.	ENSOARG00000005107	101120819	13:62368095-62369057:+1	protein-coding	Uncharacterized protein	nucleic acid binding (GO:0003676) | nucleotide binding (GO:0000166)	unknown	unknown	319.041	340.685	319.694	113.616	133.542	113.828	96.956	103.624
TMEM258	1810006K21Rik | C11H11orf10 | C11orf10 | C14H11orf10 | C21H11orf10 | C29H11orf10 | C5H11ORF10 | CD1H11orf10 | NEF1 | RGD1560328 | c11orf10 | zgc:73269	ENSOARG00000013704	101108351	21:39641349-39642599:-1	protein-coding	transmembrane protein 258	unknown	unknown	unknown	302.339	340.13	304.773	217.836	235.645	198.156	225.284	199.254
DBI	ACBD1 | ACBP | Acbp | Acoabp3 | BcDNA:RH39533 | CCK-RP | CG8627 | CPN2 | DBI | Dmel\CG8627 | EP | Ep | Odn | RNACOABP3 | Ttn | acbd1 | acbp | anon-WO0172774.131 | cck-rp | dbi | endozepine | wu:fb63e10 | zgc:56108 | zgc:77734	ENSOARG00000012490	.	2:183674973-183679298:+1	protein-coding	diazepam binding inhibitor, acyl-CoA binding protein	long-chain fatty acyl-CoA binding (GO:0036042) | fatty-acyl-CoA binding (GO:0000062) | protein dimerization activity (GO:0046983)	phosphatidylcholine acyl-chain remodeling (GO:0036151)	extracellular exosome (GO:0070062)	339.331	331.342	326.512	217.377	234.635	307.487	250.248	287.691
ENSOARG00000011430	.	ENSOARG00000011430	101107412	2:50866190-50869311:+1	protein-coding	Uncharacterized protein	unknown	unknown	mitochondrial outer membrane translocase complex (GO:0005742) | mitochondrion (GO:0005739)	287.728	324.375	324.733	339.251	336.15	228.078	337.832	242.399
NENF	1110060M21Rik | CIR2 | Neudesin | SCIRP10 | SPUF | Spuf | cir2 | scirp10 | sp2 | spuf | wu:fa11a04 | wu:fb73f07 | zgc:112953 | zgc:152703	ENSOARG00000010550	.	12:69270759-69273680:-1	protein-coding	neudesin neurotrophic factor	growth factor activity (GO:0008083)	negative regulation of appetite (GO:0032099) | positive regulation of MAPK cascade (GO:0043410)	extracellular space (GO:0005615) | nucleus (GO:0005634) | nucleoplasm (GO:0005654)	339.211	279.313	317.65	194.497	188.334	230.515	200.04	229.728
MYH8	4832426G23Rik | AI327267 | DA7 | MHC 67 | MHCp | MYH1 | MyHC | MyHC-peri | MyHC-pn | Myhs-p | Myhsp | Myosin-8 | gtMHC-F | gtmhc-f | myh1 | myhc-peri | myhc-pn	ENSOARG00000007268	101111723	11:28953967-28981097:-1	protein-coding	myosin, heavy chain 8, skeletal muscle, perinatal	ATP binding (GO:0005524) | actin binding (GO:0003779) | protein binding (GO:0005515) | motor activity (GO:0003774) | ATPase activity (GO:0016887) | nucleotide binding (GO:0000166) | microfilament motor activity (GO:0000146)	metabolic process (GO:0008152) | skeletal muscle contraction (GO:0003009) | muscle filament sliding (GO:0030049) | ATP metabolic process (GO:0046034)	myosin complex (GO:0016459) | cytoplasm (GO:0005737)	0.098	0.084	1.135	9.625	1.548	2.169	0.032	338.819
SERPING1	C1-INH | C1IN | C1INH | C1Inh | C1NH | C1nh | HAE1 | HAE2 | fb64f02 | im:7159527 | si:dkeyp-110g5.2 | wu:fb60c09 | wu:fb62a08 | wu:fb64f02	ENSOARG00000010035	.	15:78057065-78071172:+1	protein-coding	serpin family G member 1	protein binding (GO:0005515) | serine-type endopeptidase inhibitor activity (GO:0004867)	negative regulation of complement activation (GO:0045916) | negative regulation of endopeptidase activity (GO:0010951) | negative regulation of complement activation, lectin pathway (GO:0001869) | regulation of blood coagulation (GO:0030193)	blood microparticle (GO:0072562) | extracellular space (GO:0005615) | extracellular exosome (GO:0070062)	338.671	240.762	205.284	67.7	55.468	15.144	29.198	5.902
CYR61	AI325051 | CCN1 | GIG1 | IGFBP10 | Igfbp10 | Xcyr61 | ccn1 | cyr61-l2 | gig1 | igfbp10 | sumo3 | zgc:158158	ENSOARG00000014336	100037673	1:62004819-62007353:+1	protein-coding	cysteine rich angiogenic inducer 61	protein binding (GO:0005515) | extracellular matrix binding (GO:0050840) | integrin binding (GO:0005178) | insulin-like growth factor binding (GO:0005520)	osteoblast differentiation (GO:0001649) | positive regulation of cell differentiation (GO:0045597) | regulation of ERK1 and ERK2 cascade (GO:0070372) | positive regulation of osteoblast proliferation (GO:0033690) | chondroblast differentiation (GO:0060591) | positive regulation of transcription from RNA polymerase II promoter (GO:0045944) | positive regulation of ceramide biosynthetic process (GO…	extracellular matrix (GO:0031012) | extracellular region (GO:0005576)	281.44	338.613	209.293	78.712	68.261	35.367	26.921	58.426
CDKN2AIPNL	A430101B06Rik | AA409260 | D11Ertd497e | MNCb-1520 | RGD1308696 | wu:fc08b10 | zgc:101768	ENSOARG00000013946	100135688	5:43343819-43345426:-1	protein-coding	CDKN2A interacting protein N-terminal like	unknown	unknown	unknown	299.254	316.377	337.418	268.926	278.928	214.886	280.607	127.56
BIN1	150001_at | ALP-1 | AMPH2 | AMPHL | Amphl | BRAMP-2 | BcDNA:RE02417 | Bin 1 | CG6046 | Dmel\CG6046 | SAP18 | SH3P9 | amph2 | amphl | bin1 | bin1/dSAP18 | dSAP18 | dSap18 | dsap18 | sap18 | sh3p9	ENSOARG00000016188	.	2:117267199-117314475:+1	protein-coding	bridging integrator 1	identical protein binding (GO:0042802) | tau protein binding (GO:0048156) | protein binding (GO:0005515) | RNA polymerase binding (GO:0070063) | actin filament binding (GO:0051015)	positive regulation of apoptotic process (GO:0043065) | regulation of endocytosis (GO:0030100) | nucleus localization (GO:0051647) | nucleus organization (GO:0006997) | positive regulation of astrocyte differentiation (GO:0048711) | lipid tube assembly (GO:0060988) | regulation of cell cycle arrest (GO:0071156) | muscle cell differentiation (GO:0042692) | regulation of neuron differentiation (GO:…	axon (GO:0030424) | nuclear envelope (GO:0005635) | lipid tube (GO:0060987) | nucleus (GO:0005634) | cytoplasm (GO:0005737) | membrane (GO:0016020)	20.036	16.812	19.373	7.71	6.591	2.145	5.112	336.639
CLK1	CLK | CLK/STY | CLK4A | PPIL3 | STY	ENSOARG00000016541	101105634	2:202169815-202176898:-1	protein-coding	CDC like kinase 1	ATP binding (GO:0005524) | transferase activity, transferring phosphorus-containing groups (GO:0016772) | protein binding (GO:0005515) | protein tyrosine kinase activity (GO:0004713) | protein kinase activity (GO:0004672) | protein serine/threonine kinase activity (GO:0004674) | nucleotide binding (GO:0000166)	protein phosphorylation (GO:0006468) | protein autophosphorylation (GO:0046777) | peptidyl-threonine phosphorylation (GO:0018107) | regulation of RNA splicing (GO:0043484) | peptidyl-tyrosine phosphorylation (GO:0018108) | peptidyl-serine phosphorylation (GO:0018105)	nucleus (GO:0005634)	303.608	290.56	336.426	152.311	160.323	115.193	118.751	84.876
MXRA5	adlican	ENSOARG00000008760	101116543	X:1448294-1472806:-1	protein-coding	matrix remodeling associated 5	protein binding (GO:0005515)	unknown	extracellular exosome (GO:0070062)	335.994	284.861	169.333	2.369	3.017	8.603	1.372	19.995
ENSOARG00000000250	.	ENSOARG00000000250	.	6:6177567-6177770:+1	protein-coding	.	unknown	unknown	unknown	300.633	319.025	335.925	145.795	185.278	164.945	178.995	91.26
PROS1	AW214361 | BA0396 | PROS | PS21 | PS22 | PS23 | PS24 | PS25 | PSA | THPH5 | THPH6 | zgc:154001	ENSOARG00000017273	101122999	1:156720183-156786262:-1	protein-coding	protein S (alpha)	protein binding (GO:0005515) | calcium ion binding (GO:0005509)	unknown	blood microparticle (GO:0072562) | extracellular space (GO:0005615) | extracellular exosome (GO:0070062) | extracellular region (GO:0005576)	335.748	245.942	232.109	47.703	82.158	32.003	22.106	8.005
GSTM1/ENSOARG:19281 (assigned to ENSOARG00000019281)	.	ENSOARG00000019281	101107401	1:86103887-86112545:+1	protein-coding	glutathione S-transferase mu 1	protein binding (GO:0005515) | glutathione transferase activity (GO:0004364)	metabolic process (GO:0008152)	unknown	335.575	137.347	199.678	49.355	51.657	4.982	15.749	4.086
TGFBI	68kDa | AI181842 | AI747162 | BIGH3 | Beta-ig | Big-h3 | CDB1 | CDG2 | CDGG1 | CSD | CSD1 | CSD2 | CSD3 | EBMD | LCD1 | MP70 | MP78 | RGD-CAP | betaig-h3 | bgh3 | big-h3 | bigh3 | cdb1 | cdg2 | cdgg1 | csd | csd1 | csd2 | csd3 | ebmd | hm:zeh0933 | lcd1 | wu:fa13f05 | xtgfbi | zgc:110495	ENSOARG00000015081	101106006	5:44831112-44859061:+1	protein-coding	transforming growth factor beta induced	protein binding (GO:0005515) | extracellular matrix binding (GO:0050840) | collagen binding (GO:0005518)	extracellular matrix organization (GO:0030198) | cell adhesion (GO:0007155) | angiogenesis (GO:0001525)	extracellular space (GO:0005615) | proteinaceous extracellular matrix (GO:0005578) | extracellular matrix (GO:0031012) | extracellular exosome (GO:0070062) | trans-Golgi network (GO:0005802)	274.669	335.03	259.041	34.387	32.513	26.969	15.874	30.024
ENSOARG00000009298	.	ENSOARG00000009298	.	17:69427789-69430160:-1	protein-coding	Uncharacterized protein	unknown	response to selenium ion (GO:0010269) | adipose tissue development (GO:0060612) | corticosterone secretion (GO:0035934) | multicellular organism growth (GO:0035264) | hormone metabolic process (GO:0042445)	Golgi apparatus (GO:0005794) | endoplasmic reticulum (GO:0005783)	264.429	333.367	295.422	131.686	139.699	99.44	149.363	31.954
C19orf70	.	ENSOARG00000007562	101121949	5:16225500-16226953:+1	protein-coding	chromosome 19 open reading frame 70	unknown	unknown	mitochondrion (GO:0005739)	152.233	155.06	181.098	253.365	247.979	300.878	332.487	258.56
GOT2	152801_at | AL022787 | ASPATA | CG4233 | Dmel\CG4233 | FABP-1 | FABP-pm | FABPpm | GB10467 | Got | Got 2 | Got-2 | KAT4 | KATIV | MAST | got2 | mAspAT | mitAAT	ENSOARG00000001717	443093	14:25868550-25890497:-1	protein-coding	glutamic-oxaloacetic transaminase 2	L-aspartate:2-oxoglutarate aminotransferase activity (GO:0004069) | transferase activity (GO:0016740) | pyridoxal phosphate binding (GO:0030170) | poly(A) RNA binding (GO:0044822) | transaminase activity (GO:0008483) | catalytic activity (GO:0003824) | L-phenylalanine:2-oxoglutarate aminotransferase activity (GO:0080130)	fatty acid transport (GO:0015908) | aspartate catabolic process (GO:0006533) | oxaloacetate metabolic process (GO:0006107) | cellular amino acid metabolic process (GO:0006520) | response to ethanol (GO:0045471) | glutamate catabolic process to 2-oxoglutarate (GO:0019551) | glutamate catabolic process to aspartate (GO:0019550) | aspartate biosynthetic process (GO:0006532) | biosynthetic process (G…	myelin sheath (GO:0043209) | plasma membrane (GO:0005886) | mitochondrion (GO:0005739) | extracellular exosome (GO:0070062) | mitochondrial inner membrane (GO:0005743)	40.709	46.677	69.585	237.761	234.852	264.28	285.696	332.193
NDRG4	BDM1 | Bdm1 | D8Bwg1337e | Ndr1-rs | Ndr4 | R74996 | SMAP-8 | SMAP8 | ndrg3 | si:ch211-194m7.2 | smap-8 | smap8 | zgc:136766	ENSOARG00000001432	.	14:25701810-25717354:+1	protein-coding	NDRG family member 4	protein binding (GO:0005515)	vesicle docking (GO:0048278) | positive regulation of ERK1 and ERK2 cascade (GO:0070374) | negative regulation of smooth muscle cell proliferation (GO:0048662) | regulation of endocytic recycling (GO:2001135) | visual learning (GO:0008542) | negative regulation of platelet-derived growth factor receptor signaling pathway (GO:0010642) | negative regulation of smooth muscle cell migration (GO:00149…	basolateral plasma membrane (GO:0016323) | cytoplasm (GO:0005737) | cell projection membrane (GO:0031253)	28.061	16.784	90.834	331.814	214.84	187.098	301.296	1.354
ACTN1	3110023F10Rik | Actn1a | BDPLT15 | a-actinin | actinin	ENSOARG00000021179	.	7:77577780-77619469:-1	protein-coding	actinin alpha 1	ligand-dependent nuclear receptor transcription coactivator activity (GO:0030374) | protein binding (GO:0005515) | integrin binding (GO:0005178) | actin filament binding (GO:0051015) | actin binding (GO:0003779) | calcium ion binding (GO:0005509) | ion channel binding (GO:0044325) | protein homodimerization activity (GO:0042803) | double-stranded RNA binding (GO:0003725) | vinculin binding (GO:00…	platelet formation (GO:0030220) | focal adhesion assembly (GO:0048041) | platelet morphogenesis (GO:0036344) | actin crosslink formation (GO:0051764) | actin filament bundle assembly (GO:0051017) | actin filament organization (GO:0007015) | actin filament network formation (GO:0051639) | negative regulation of cellular component movement (GO:0051271)	cell projection (GO:0042995) | extracellular space (GO:0005615) | ruffle (GO:0001726) | Z disc (GO:0030018) | brush border (GO:0005903) | extracellular exosome (GO:0070062) | intracellular (GO:0005622) | fascia adherens (GO:0005916) | stress fiber (GO:0001725) | focal adhesion (GO:0005925) | actin filament (GO:0005884) | cytoplasm (GO:0005737) | cell-cell junction (GO:0005911) | sarcomere (GO:003…	180.288	331.507	172.104	23.743	31.192	24.601	15.447	10.79
ENSOARG00000019701	.	ENSOARG00000019701	101105144	3:37984699-37991970:+1	protein-coding	.	RNA binding (GO:0003723)	mRNA splicing, via spliceosome (GO:0000398)	small nucleolar ribonucleoprotein complex (GO:0005732)	285.108	331.445	292.609	149.59	172.245	153.722	168.368	198.229
ASPN	4631401G09Rik | AA986886 | OS3 | PLAP-1 | PLAP1 | Plap1 | SLRR1C | Slrr1c | aspnl | bgl3 | os3 | plap-1 | plap1 | slrr1c | wu:fk08c11 | zgc:109936	ENSOARG00000008249	101108885	2:28671301-28688743:+1	protein-coding	asporin	protein binding (GO:0005515) | calcium ion binding (GO:0005509) | collagen binding (GO:0005518)	negative regulation of tooth mineralization (GO:0070171) | bone mineralization (GO:0030282) | negative regulation of transforming growth factor beta receptor signaling pathway (GO:0030512)	extracellular matrix (GO:0031012) | proteinaceous extracellular matrix (GO:0005578)	330.937	149.707	96.049	11.385	16.313	35.312	10.516	17.72
ACYP2	2310004B09Rik | ACYM | ACYP | AcPDro2 | CG18505 | Dmel\CG18505 | acym | acyp	ENSOARG00000003600	.	3:69651114-69819801:-1	protein-coding	acylphosphatase 2	protein binding (GO:0005515) | acylphosphatase activity (GO:0003998)	metabolic process (GO:0008152)	mitochondrion (GO:0005739)	88.477	88.86	106.886	190.062	196.143	111.599	265.411	330.812
ENSOARG00000014576	.	ENSOARG00000014576	.	18:24180370-24196808:+1	protein-coding	.	unknown	unknown	nucleus (GO:0005634)	330.075	325.844	318.261	213.459	229.647	212.241	194.131	103.685
ARHGDIA	5330430M07Rik | Bles01 | GDIA1 | Gdi-1 | HEL-S-47e | NPHS8 | RHOGDI | RHOGDI-1 | Rho-GDI | RhoDGI | RhoGDI-1 | gdia1 | rhogdi | rhogdi-1 | rhogdi1 | wu:fa96g11 | zgc:55554 | zgc:77681	ENSOARG00000017985	101114713	11:50189207-50190485:+1	protein-coding	Rho GDP dissociation inhibitor alpha	Rho GDP-dissociation inhibitor activity (GO:0005094) | protein binding (GO:0005515)	semaphorin-plexin signaling pathway (GO:0071526) | Rho protein signal transduction (GO:0007266) | regulation of protein localization (GO:0032880)	nucleus (GO:0005634) | cytoplasm (GO:0005737) | immunological synapse (GO:0001772) | membrane (GO:0016020)	283.935	329.552	275.051	87.134	97.347	79.231	67.936	64.77
THBS1	THBS | THBS-1 | TSP | TSP-1 | TSP1 | Thbs-1 | Tsp-1 | Tsp1 | si:dkey-11e23.1 | tbsp1 | thbs | thbs-1 | thrombospondin-1 | tsp | tsp-1 | tsp1 | wu:fc48c03	ENSOARG00000020058	101106433	7:32243494-32406527:+1	protein-coding	thrombospondin 1	fibronectin binding (GO:0001968) | collagen V binding (GO:0070052) | protein binding (GO:0005515) | laminin binding (GO:0043236) | integrin binding (GO:0005178) | low-density lipoprotein particle binding (GO:0030169) | fibroblast growth factor binding (GO:0017134) | calcium ion binding (GO:0005509) | extracellular matrix binding (GO:0050840) | heparin binding (GO:0008201) | phosphatidylserine bin…	positive regulation of angiogenesis (GO:0045766) | inflammatory response (GO:0006954) | engulfment of apoptotic cell (GO:0043652) | sprouting angiogenesis (GO:0002040) | cell migration (GO:0016477) | response to drug (GO:0042493) | negative regulation of endothelial cell migration (GO:0010596) | negative regulation of cGMP-mediated signaling (GO:0010754) | negative regulation of blood vessel endo…	platelet alpha granule (GO:0031091) | extracellular space (GO:0005615) | extracellular matrix (GO:0031012) | cell surface (GO:0009986) | fibrinogen complex (GO:0005577) | extracellular exosome (GO:0070062) | extracellular region (GO:0005576) | external side of plasma membrane (GO:0009897) | secretory granule (GO:0030141)	272.217	329.3	196.249	4.531	3.938	6.318	2.224	15.696
ENSOARG00000007749	.	ENSOARG00000007749	.	5:3560150-3576196:-1	protein-coding	Uncharacterized protein	unknown	extrinsic apoptotic signaling pathway (GO:0097191)	nucleus (GO:0005634) | mitochondrion (GO:0005739) | mitochondrial inner membrane (GO:0005743)	62.514	64.03	98.358	253.93	219.441	213.902	329.177	181.066
ENSOARG00000006331	.	ENSOARG00000006331	.	18:66999358-66999599:+1	protein-coding	.	metal ion binding (GO:0046872)	unknown	unknown	290.157	254.356	328.749	157.552	147.764	123.382	161.405	86.034
RCN1	ATB BETA BETA | EER1 | ENHANCED ETHYLENE RESPONSE 1 | F2J7.19 | F2J7_19 | HEL-S-84 | PHOSPHOPROTEIN PHOSPHATASE 2A REGULATORY SUBUNIT A | PIG20 | RCAL | RCN | REGA | ROOTS CURL IN NPA | Rcn | SERINE/THREONINE PROTEIN PHOSPHATASE TYPE 2A REGULATORY SUBUNIT A | im:7158588 | pig20 | rcal | rcn | wu:fa06h02	ENSOARG00000016258	.	15:61058970-61065790:+1	protein-coding	reticulocalbin 1	protein binding (GO:0005515) | calcium ion binding (GO:0005509)	camera-type eye development (GO:0043010) | in utero embryonic development (GO:0001701)	endoplasmic reticulum (GO:0005783)	304.549	328.599	244.171	61.868	80.404	47.629	30.962	37.115
EEF2	EEF-2 | EF-2 | EF2 | Ef-2 | Ef2 | SCA26 | ef2 | zef2	ENSOARG00000011109	.	5:17593660-17606951:+1	protein-coding	eukaryotic translation elongation factor 2	protein binding (GO:0005515) | poly(A) RNA binding (GO:0044822) | protein kinase binding (GO:0019901) | GTPase activity (GO:0003924) | nucleotide binding (GO:0000166) | GTP binding (GO:0005525)	metabolic process (GO:0008152) | positive regulation of translation (GO:0045727) | translational elongation (GO:0006414) | hematopoietic progenitor cell differentiation (GO:0002244)	polysome (GO:0005844) | plasma membrane (GO:0005886) | membrane (GO:0016020) | aggresome (GO:0016235) | extracellular exosome (GO:0070062) | intracellular ribonucleoprotein complex (GO:0030529) | nucleus (GO:0005634) | cytoplasm (GO:0005737)	312.289	323.465	327.573	161.056	155.452	218.516	159.387	241.057
PRDX1	BS003 | BS003P | GekBS014P | Hbp23 | MSP23 | NKEF-A | NKEFA | NkefA | OSF-3 | OSF3 | PAG | PAGA | PAGB | PRX1 | PRXI | Pag | Paga | PrdxI | PrxI | TDPX2 | TDX2 | TPX-2 | TPxA | Tdpx2 | hm:zehl0637 | msp23 | nkefa | pag | paga | pagb | prx-1 | prx1 | prxi | prxi-1 | tdpx2 | zgc:110343	ENSOARG00000001702	101120966	1:19912292-19922232:-1	protein-coding	peroxiredoxin 1	peroxidase activity (GO:0004601) | protein binding (GO:0005515) | thioredoxin peroxidase activity (GO:0008379) | antioxidant activity (GO:0016209) | peroxiredoxin activity (GO:0051920) | identical protein binding (GO:0042802) | poly(A) RNA binding (GO:0044822) | oxidoreductase activity (GO:0016491)	natural killer cell mediated cytotoxicity (GO:0042267) | response to reactive oxygen species (GO:0000302) | hydrogen peroxide catabolic process (GO:0042744) | regulation of NF-kappaB import into nucleus (GO:0042345) | removal of superoxide radicals (GO:0019430) | regulation of stress-activated MAPK cascade (GO:0032872) | retina homeostasis (GO:0001895) | erythrocyte homeostasis (GO:0034101) | res…	myelin sheath (GO:0043209) | nucleus (GO:0005634) | extracellular space (GO:0005615) | cytoplasm (GO:0005737) | mitochondrion (GO:0005739) | extracellular exosome (GO:0070062)	310.52	325.985	295.216	197.749	200.206	213.619	211.2	271.387
IFI6	6-16 | FAM14C | G1P3 | IFI-6-16 | IFI616 | ISG12-2 | Ifi-6-16	ENSOARG00000003341	101106828	2:238537980-238539929:+1	protein-coding	interferon alpha inducible protein 6	protein binding (GO:0005515)	negative regulation of cysteine-type endopeptidase activity involved in apoptotic process (GO:0043154) | negative regulation of mitochondrial depolarization (GO:0051902) | release of cytochrome c from mitochondria (GO:0001836) | negative regulation of extrinsic apoptotic signaling pathway in absence of ligand (GO:2001240)	integral component of membrane (GO:0016021) | mitochondrion (GO:0005739)	325.52	254.131	255.401	40.757	55.981	10.509	24.625	4.366
ENSOARG00000005297	.	ENSOARG00000005297	.	3:77129124-77141270:+1	protein-coding	.	calcium ion binding (GO:0005509)	unknown	unknown	291.201	324.569	255.022	108.572	105.706	99.219	106.901	97.716
EMP1	CL-20 | EMP-1 | EMP2 | ENP1MR | I-8-09 | TMP | si:ch73-90k17.2	ENSOARG00000020808	101109432	3:201508686-201517182:-1	protein-coding	epithelial membrane protein 1	protein binding (GO:0005515)	cell growth (GO:0016049) | cell death (GO:0008219) | bleb assembly (GO:0032060)	integral component of membrane (GO:0016021) | plasma membrane (GO:0005886) | membrane (GO:0016020)	218.67	324.379	154.494	17.22	21.474	41.465	10.619	38.222
ENSOARG00000018661	.	ENSOARG00000018661	780452	9:76021905-76053607:+1	protein-coding	.	protein binding (GO:0005515) | protein domain specific binding (GO:0019904)	protein targeting (GO:0006605) | regulation of cell death (GO:0010941)	nucleus (GO:0005634) | mitochondrion (GO:0005739)	247.043	323.406	223.211	44.449	51.944	58.151	38.968	25.073
PTRF	2310075E07Rik | AW546441 | CAVIN | CAVIN1 | CGL4 | Cav-p60 | Cavin | Cavin-1 | FKSG13 | cavin-1	ENSOARG00000001836	101110525	11:41994203-42005842:-1	protein-coding	polymerase I and transcript release factor	protein binding (GO:0005515) | rRNA primary transcript binding (GO:0042134) | poly(A) RNA binding (GO:0044822)	termination of RNA polymerase I transcription (GO:0006363) | transcription initiation from RNA polymerase I promoter (GO:0006361)	protein complex (GO:0043234) | nucleus (GO:0005634) | cytoplasm (GO:0005737) | membrane raft (GO:0045121) | caveola (GO:0005901) | mitochondrion (GO:0005739)	262.209	322.171	242.625	168.247	191.104	121.952	141.7	114.124
S1PR1	AI849002 | CD363 | CHEDG1 | D1S3362 | ECGF1 | EDG-1 | EDG1 | Edg1 | Lpb1 | S1P1 | S1p | S1p1 | edg1 | etID43307.22 | s1p1 | wu:fb98f05 | xts1p1	ENSOARG00000010691	101115839	1:77748845-77749996:+1	protein-coding	sphingosine-1-phosphate receptor 1	G-protein coupled receptor activity (GO:0004930) | sphingosine-1-phosphate receptor activity (GO:0038036) | G-protein coupled receptor binding (GO:0001664) | signal transducer activity (GO:0004871)	cell migration (GO:0016477) | actin cytoskeleton reorganization (GO:0031532) | regulation of cell adhesion (GO:0030155) | brain development (GO:0007420) | regulation of bone resorption (GO:0045124) | regulation of bone mineralization (GO:0030500) | positive regulation of cell proliferation (GO:0008284) | angiogenesis (GO:0001525) | blood vessel maturation (GO:0001955) | adenylate cyclase-inhibiti…	integral component of membrane (GO:0016021) | external side of plasma membrane (GO:0009897) | intrinsic component of plasma membrane (GO:0031226)	173.695	322.136	252.431	45.863	52.258	29.242	21.093	20.795
SMIM7 (assigned to ENSOARG00000018764)	.	ENSOARG00000018764	.	5:6124418-6129660:+1	protein-coding	small integral membrane protein 7	unknown	unknown	unknown	321.649	299.587	313.76	116.686	129.651	76.203	109.978	63.358
ENSOARG00000007930	.	ENSOARG00000007930	.	18:45103354-45200543:-1	protein-coding	Uncharacterized protein	5S rRNA binding (GO:0008097) | structural constituent of ribosome (GO:0003735)	translation (GO:0006412)	intracellular (GO:0005622) | ribosome (GO:0005840)	320.973	286.495	275.283	95.536	107.702	139.033	85.956	162.688
ENSOARG00000003945	.	ENSOARG00000003945	101115926	23:49324541-49329864:-1	protein-coding	Uncharacterized protein	structural constituent of ribosome (GO:0003735)	translation (GO:0006412)	intracellular (GO:0005622) | large ribosomal subunit (GO:0015934) | intracellular ribonucleoprotein complex (GO:0030529) | ribosome (GO:0005840)	320.019	299.173	286.937	79.746	92.677	63.488	62.666	75.055
ENSOARG00000009364	.	ENSOARG00000009364	.	X:81136648-81136788:-1	protein-coding	Uncharacterized protein	unknown	unknown	unknown	278.822	285.592	319.965	133.682	144.034	178.836	112.359	139.092
TNNI1	2700018B22Rik | AI747285 | SSTNI | TNN1 | TnI-S4 | ssTnI	ENSOARG00000018755	.	12:78591681-78596742:+1	protein-coding	troponin I1, slow skeletal type	protein binding (GO:0005515)	transition between fast and slow fiber (GO:0014883) | ventricular cardiac muscle tissue morphogenesis (GO:0055010)	troponin complex (GO:0005861)	0.033	0.137	2.845	14.765	3.185	0.471	10.456	319.018
ENSOARG00000001995	.	ENSOARG00000001995	101119027	AMGL01124730.1:246-2054:+1	protein-coding	Uncharacterized protein	protein binding (GO:0005515) | calcium ion binding (GO:0005509)	unknown	unknown	246.897	318.914	271.065	106.666	104.801	147.605	96.66	32.86
TOMM20	1810060K07Rik | BB284719 | Gm19268 | MAS20 | MOM19 | TOM20 | Tom20 | mKIAA0016 | mas20 | mom19 | tom20 | tomm20b | zgc:92628	ENSOARG00000003459	.	25:7925956-7932498:-1	protein-coding	translocase of outer mitochondrial membrane 20	protein binding (GO:0005515) | P-P-bond-hydrolysis-driven protein transmembrane transporter activity (GO:0015450) | unfolded protein binding (GO:0051082)	protein targeting (GO:0006605) | intracellular protein transport (GO:0006886) | protein targeting to mitochondrion (GO:0006626)	mitochondrial envelope (GO:0005740) | mitochondrial outer membrane (GO:0005741) | ER-mitochondrion membrane contact site (GO:0044233) | mitochondrial outer membrane translocase complex (GO:0005742) | mitochondrion (GO:0005739)	309.585	318.303	300.785	199.271	206.645	164.544	162.844	282.557
YWHAQ	14-3-3 | 14-3-3t | 1C5 | 1c5 | 2700028P07Rik | AA409740 | AU021156 | HS1 | R74690 | hs1	ENSOARG00000015184	101117574	3:18788569-18818377:-1	protein-coding	tyrosine 3-monooxygenase/tryptophan 5-monooxygenase activation protein theta	protein binding (GO:0005515) | protein N-terminus binding (GO:0047485) | protein domain specific binding (GO:0019904)	substantia nigra development (GO:0021762) | small GTPase mediated signal transduction (GO:0007264) | protein targeting (GO:0006605) | negative regulation of transcription, DNA-templated (GO:0045892)	protein complex (GO:0043234) | focal adhesion (GO:0005925) | cytoplasm (GO:0005737) | membrane (GO:0016020) | extracellular exosome (GO:0070062)	295.425	316.882	283.305	74.532	93.355	91.533	63.159	36.836
SLIRP (assigned to ENSOARG00000002642)	.	ENSOARG00000002642	100270716	7:85795918-85801678:+1	protein-coding	SRA stem-loop interacting RNA binding protein	nucleic acid binding (GO:0003676) | nucleotide binding (GO:0000166)	unknown	unknown	180.042	162.421	162.776	230.064	209.594	265.42	239.547	316.23
EFEMP1	DHRD | DRAD | FBLN3 | FBNL | FIBL-3 | Fibulin-3 | MLVT | MTLV | S1-5 | T16	ENSOARG00000002053	101120648	3:68110961-68179006:+1	protein-coding	EGF containing fibulin like extracellular matrix protein 1	protein binding (GO:0005515) | calcium ion binding (GO:0005509) | epidermal growth factor receptor binding (GO:0005154) | epidermal growth factor-activated receptor activity (GO:0005006)	embryonic eye morphogenesis (GO:0048048) | regulation of transcription, DNA-templated (GO:0006355) | epidermal growth factor receptor signaling pathway (GO:0007173) | negative regulation of chondrocyte differentiation (GO:0032331) | camera-type eye development (GO:0043010) | peptidyl-tyrosine phosphorylation (GO:0018108) | post-embryonic eye morphogenesis (GO:0048050)	extracellular space (GO:0005615) | extracellular matrix (GO:0031012) | extracellular exosome (GO:0070062)	315.232	304.896	148.041	38.763	41.707	32.203	19.765	23.075
ENSOARG00000014550	.	ENSOARG00000014550	101110118	X:16816665-16836838:+1	protein-coding	Pyruvate dehydrogenase E1 component subunit alpha	oxidoreductase activity, acting on the aldehyde or oxo group of donors, disulfide as acceptor (GO:0016624) | pyruvate dehydrogenase (acetyl-transferring) activity (GO:0004739) | oxidoreductase activity (GO:0016491)	metabolic process (GO:0008152) | glycolytic process (GO:0006096) | oxidation-reduction process (GO:0055114)	intracellular membrane-bounded organelle (GO:0043231)	27.417	33.893	55.139	203.278	219.367	315.052	216.011	284.945
EIF3K	1200009C21Rik | ARG134 | ATTIF3K1 | EIF3-p28 | EIF3S12 | Eif3s12 | F17M5.10 | F17M5_10 | HSPC029 | M9 | MSTP001 | PLAC-24 | PLAC24 | PRO1474 | PTD001 | TIF3K1 | eif3s12 | eukaryotic translation initiation factor 3K | zgc:110726	ENSOARG00000005760	101111219	14:47570175-47582605:+1	protein-coding	eukaryotic translation initiation factor 3 subunit K	RNA binding (GO:0003723) | protein binding (GO:0005515) | translation initiation factor activity (GO:0003743) | ribosome binding (GO:0043022) | binding (GO:0005488)	translational initiation (GO:0006413) | formation of translation preinitiation complex (GO:0001731) | translation (GO:0006412) | regulation of translational initiation (GO:0006446)	nucleus (GO:0005634) | eukaryotic 43S preinitiation complex (GO:0016282) | eukaryotic translation initiation factor 3 complex (GO:0005852) | eukaryotic 48S preinitiation complex (GO:0033290) | cytoplasm (GO:0005737) | membrane (GO:0016020) | extracellular exosome (GO:0070062)	314.633	309.153	312.505	193.445	174.938	236.932	220.144	296.514
DDX39B	0610030D10Rik | AI428441 | BAT1 | Bat-1 | Bat1 | Bat1a | D17H6S81E | D17H6S81E-1 | D6S81E | D6S81Eh | UAP56 | bat1 | bat1a | d6s81e | p47 | uap56 | zgc:63773	ENSOARG00000008787	101101929	20:26887456-26896963:+1	protein-coding	DEAD-box helicase 39B	protein binding (GO:0005515) | nucleic acid binding (GO:0003676) | hydrolase activity (GO:0016787) | ATP binding (GO:0005524) | ATP-dependent RNA helicase activity (GO:0004004) | RNA-dependent ATPase activity (GO:0008186) | U4 snRNA binding (GO:0030621) | poly(A) RNA binding (GO:0044822) | ATPase activity (GO:0016887) | DNA binding (GO:0003677) | U6 snRNA binding (GO:0017070) | ATP-dependent prot…	mRNA export from nucleus (GO:0006406) | positive regulation of DNA-templated transcription, elongation (GO:0032786) | mRNA splicing, via spliceosome (GO:0000398) | viral mRNA export from host cell nucleus (GO:0046784) | negative regulation of DNA damage checkpoint (GO:2000002) | RNA secondary structure unwinding (GO:0010501) | spliceosomal complex assembly (GO:0000245) | RNA splicing (GO:0008380)	U4 snRNP (GO:0005687) | spliceosomal complex (GO:0005681) | nucleus (GO:0005634) | transcription export complex (GO:0000346) | U6 snRNP (GO:0005688) | cytoplasm (GO:0005737) | nucleoplasm (GO:0005654)	282.5	308.708	314.175	205.928	200.259	185.531	183.6	174.646
C1QC	AI385742 | C1Q-C | C1QA | C1QG | C1qg | Ciqc | c1q-c | c1qg | zgc:103597	ENSOARG00000007991	.	2:243066612-243070884:-1	protein-coding	complement component 1, q subcomponent, C chain	protein binding (GO:0005515) | tumor necrosis factor receptor binding (GO:0005164)	negative regulation of macrophage differentiation (GO:0045650) | immune response (GO:0006955) | negative regulation of granulocyte differentiation (GO:0030853)	blood microparticle (GO:0072562) | extracellular space (GO:0005615) | collagen trimer (GO:0005581) | membrane (GO:0016020) | extracellular exosome (GO:0070062) | extracellular region (GO:0005576)	296.541	314.116	221.936	34.98	56.861	26.094	20.443	17.095
ENSOARG00000008178	.	ENSOARG00000008178	.	21:49751580-49752838:-1	protein-coding	Uncharacterized protein	unknown	response to biotic stimulus (GO:0009607)	integral component of membrane (GO:0016021)	280.785	265.304	313.815	95.727	108.178	73.074	74.089	38.036
[truncated: 14,660 more rows]
