# Supplementary material for: Expression of Calcification and Extracellular Matrix Genes in the Cardiovascular System of the Healthy Domestic Sheep (Ovis aries)
Source: Front Genet. 2020 Sep 8;11:919. doi: 10.3389/fgene.2020.00919 (PMC7506100; doi:10.3389/fgene.2020.00919)
Supplement: DATASET S3 — RT-qPCR results for all genes analyzed including standard deviations. [file Table_3.XLSX]

## Sheet: adult qPCR data with SD
Results from RT-qPCR for adult cardiovascular regions
			Gene expression (Log_Delta)								SD
Tissue no.	Sheep ID	Tissue name	FBN1	OPG	MGP	ANKH	NT5E	RUNX2	ENPP1	OPN	FBN1	OPG	MGP	ANKH	NT5E	RUNX2	ENPP1	OPN
1	Sheep_Adult_3	Left auricle	-0.569551	-3.3768	1.20144	-0.58688	-4.38533	-5.0958	-3.33174	-5.10967
1	Sheep_Adult_4	Left auricle	-2.598	-6.52468	-0.196246	-2.93418	-3.01389	-5.29088	-4.21303	-7.6857
1	Sheep_Adult_5	Left auricle	-2.557	-7.33625	-0.0131459	-2.47728	-3.90517	-6.54606	-3.92596	-8.3933
1	Sheep_Adult_6	Left auricle	-2.08527	-6.70163	1.15519	-2.05061	-2.9517	-5.65498	-2.63632	-5.84213
1	Sheep_Adult_7	Left auricle	-1.76947	-5.79665	-0.0955182	-1.72095	-3.23201	-6.1051	-3.72761	-5.94568	0.827504	1.538	0.704242	0.889837	0.623836	0.593075	0.611048	1.38005
2	Sheep_Adult_4	Left atrium	-3.33135	-8.83841	-0.03544	-2.8011	-4.35375	-5.55982	-4.63447	-5.43852
2	Sheep_Adult_6	Left atrium	-2.2976	-9.70734	1.26864	-1.61138	-3.41703	-5.62817	-2.89371	-7.68682
2	Sheep_Adult_7	Left atrium	-2.49506	-9.20472	-0.498794	-1.52465	-4.5537	-6.17913	-3.87789	-10.4628	0.548791	0.436245	0.916439	0.713238	0.606828	0.339553	0.872859	2.51674
3	Sheep_Adult_3	Left ventricle	-2.16827	-6.51776	1.07913	-0.00218045	-4.0259	-5.0067	-3.5199	-5.38793
3	Sheep_Adult_4	Left ventricle	-3.85216	-8.64527	-0.913218	-1.89749	-4.45867	-5.87962	-4.86416	-6.46879
3	Sheep_Adult_5	Left ventricle	-3.50589	-11.3211	-0.508026	-1.45071	-4.50402	-5.59573	-3.54748	-10.427
3	Sheep_Adult_6	Left ventricle	-2.69243	-13.7724	-0.0376813	-0.931841	-4.77534	-5.01794	-2.61965	-7.58605
3	Sheep_Adult_7	Left ventricle	-2.68998	-10.4498	-1.68492	-1.67452	-4.94618	-6.57507	-3.94805	-9.30954	0.682445	2.74044	1.03009	0.755119	0.350911	0.655484	0.812347	2.04995
4	Sheep_Adult_3	Right auricle	-1.48617	-4.7405	1.27256	-1.53469	-4.85833	-4.92071	-3.45817	-4.97963
4	Sheep_Adult_6	Right auricle	-2.09203	-6.62175	1.19695	-2.34503	-2.99312	-6.02564	-2.62575	-5.27011
4	Sheep_Adult_7	Right auricle	-2.17669	-7.34757	-0.353714	-2.41583	-4.08285	-5.65629	-3.88876	-8.17241	0.376619	1.34553	0.917882	0.489568	0.937007	0.562487	0.642072	1.76548
5	Sheep_Adult_3	Right atrium	-2.60279	-4.72382	2.83495	-0.377786	-4.43963	-5.10505	-3.45883	-5.37538
5	Sheep_Adult_4	Right atrium	-3.73363	-6.54781	0.394061	-3.00236	-3.88612	-5.07834	-4.66938	-7.36226
5	Sheep_Adult_6	Right atrium	-2.5513	-6.56809	0.949091	-2.41614	-4.48865	-6.13487	-3.22712	-5.161
5	Sheep_Adult_7	Right atrium	-2.84225	-7.43435	-0.381579	-2.49568	-4.36024	-6.20748	-3.87851	-8.47061	0.548931	1.14062	1.37055	1.15958	0.276795	0.62404	0.634111	1.59691
6	Sheep_Adult_3	Right ventricle	-0.630175	-5.44755	3.73319	1.9414	-1.66643	-2.97994	-2.41849	-6.86157
6	Sheep_Adult_4	Right ventricle	-3.7628	-8.33411	-0.248544	-2.15816	-4.63617	-5.6239	-5.28772	-6.16456
6	Sheep_Adult_5	Right ventricle	-2.78469	-6.50689	0.13693	-1.27016	-3.90065	-4.95424	-3.48476	-7.86892
6	Sheep_Adult_6	Right ventricle	-2.9433	-11.3685	0.16893	-1.75109	-4.39198	-5.553	-3.19977	-6.33626
6	Sheep_Adult_7	Right ventricle	-2.84044	-8.35442	-1.1145	-1.63436	-4.97879	-6.29577	-3.59597	-6.94733	1.16638	2.25435	1.86116	1.66053	1.31677	1.26725	1.05093	0.667187
7	Sheep_Adult_3	Interventricular septum	-1.97218	-7.00097	0.838528	-0.672533	-4.39473	-4.73438	-3.6496	-5.88153
7	Sheep_Adult_4	Interventricular septum	-3.34451	-9.30211	-0.540731	-1.42103	-4.41542	-5.28532	-4.42929	-7.37516
7	Sheep_Adult_7	Interventricular septum	-2.82049	-8.29289	-1.0599	-1.69066	-5.24304	-6.50111	-3.94339	-6.77143	0.692521	1.15346	0.98115	0.527501	0.48391	0.903974	0.393768	0.75137
8	Sheep_Adult_4	Aortic base	-2.02483	-3.6156	0.50169	-1.42872	-2.22584	-5.20638	-4.11467	-9.41378
8	Sheep_Adult_5	Aortic base	-0.657804	-0.987049	1.75088	-0.328559	-1.65594	-5.2811	-1.63168	-5.57222
8	Sheep_Adult_6	Aortic base	-1.29299	-2.45055	0.897355	-2.27379	-3.01546	-6.34257	-1.37617	-6.46733
8	Sheep_Adult_7	Aortic base	-0.795571	-0.941132	2.19883	-1.41594	-5.05149	-4.5455	-2.26158	-6.43779	0.618149	1.28588	0.775687	0.79723	1.48482	0.743335	1.23641	1.67946
9	Sheep_Adult_3	Aortic arch	-0.132044	0.71013	3.20546	2.02364	-2.16296	-2.98088	-0.658835	-1.047
9	Sheep_Adult_4	Aortic arch	-1.6844	-3.1608	0.589122	-1.99632	-2.22852	-5.10508	-3.69106	-6.63694
9	Sheep_Adult_5	Aortic arch	-0.656727	-4.07394	-0.105675	-2.13313	-4.02542	-4.89186	-1.90093	-5.20724
9	Sheep_Adult_6	Aortic arch	-0.563456	-7.54345	0.302978	-2.83351	-2.66369	-4.47974	-1.42296	-7.86923
9	Sheep_Adult_7	Aortic arch	-0.790897	-2.51683	1.0806	-1.76823	-2.79409	-5.03642	-2.44752	-7.01536	0.569856	2.97146	1.29872	1.92275	0.749923	0.882547	1.14001	2.69731
10	Sheep_Adult_3	Descending thoracic aorta	-0.695822	-0.00960664	2.87735	0.368159	-3.28819	-3.95361	-2.40096	-3.5204
10	Sheep_Adult_4	Descending thoracic aorta	-2.66489	-8.03678	0.436946	-2.77579	-3.00106	-5.70087	-4.87949	-6.52225
10	Sheep_Adult_5	Descending thoracic aorta	-0.424304	-1.59919	0.36935	-1.01001	-1.89031	-5.17583	-1.80713	-4.35098
10	Sheep_Adult_6	Descending thoracic aorta	-1.31166	-2.23354	1.01732	-0.881905	-4.70808	-4.73234	-1.97361	-5.51213	0.998709	3.50512	1.17142	1.29318	1.15974	0.739569	1.43148	1.31501
11	Sheep_Adult_3	Abdominal aorta	-0.201651	1.2193	4.04388	1.51042	-3.02969	-3.65699	-1.78549	-1.88253
11	Sheep_Adult_4	Abdominal aorta	-1.33433	-2.44336	1.11941	-1.55613	-2.69289	-4.49508	-2.71022	-6.99041
11	Sheep_Adult_5	Abdominal aorta	-1.27718	-2.44167	0.968616	-1.27025	-3.44327	-4.82609	-3.19027	-6.18466
11	Sheep_Adult_6	Abdominal aorta	0.0559424	-2.55722	1.73336	-1.25757	-3.136	-4.09254	-2.20718	-5.14266	0.719919	1.85082	1.42398	1.44247	0.309514	0.505685	0.609391	2.24307
12	Sheep_Adult_3	Pulmonary artery	-0.613754	-0.457796	3.10151	1.31666	-2.35702	-4.28397	-2.15601	-3.63934
12	Sheep_Adult_4	Pulmonary artery	-2.51118	-2.34136	0.632246	-1.53384	-2.33442	-4.93719	-3.47119	-6.7775
12	Sheep_Adult_5	Pulmonary artery	-0.485477	-0.54786	2.0861	-0.461217	-0.977611	-4.0032	-1.46628	-4.89389
12	Sheep_Adult_6	Pulmonary artery	-0.977576	-4.0101	1.341	-0.811221	-2.7347	-5.33747	-1.77816	-8.9661
12	Sheep_Adult_7	Pulmonary artery	0.350789	-2.34555	2.40597	-0.851822	0.267611	-4.7889	-2.08216	-3.93979	1.04956	1.47867	0.955649	1.07077	1.25216	0.530257	0.766094	2.22524
13	Sheep_Adult_3	Cranial vena cava	-2.06943	-4.74151	3.07026	0.668506	-4.1558	-4.81775	-3.50424	-3.65327
13	Sheep_Adult_4	Cranial vena cava	-1.25916	-2.71477	0.484101	-1.8726	-2.83607	-5.07147	-12.3599	-6.13545
13	Sheep_Adult_5	Cranial vena cava	-1.82455	-7.1202	0.566804	-2.41373	-4.10154	-5.02689	-3.04449	-3.98371
13	Sheep_Adult_6	Cranial vena cava	-1.65722	-8.8001	0.0756472	-2.73506	-4.84916	-5.68787	-2.95687	-3.34503
13	Sheep_Adult_7	Cranial vena cava	-2.16545	-7.62398	-0.806879	-1.90205	-4.48402	-6.25848	-4.09586	-6.56347	0.360387	2.44484	1.444	1.34622	0.759649	0.592078	4.03227	1.49759
14	Sheep_Adult_3	Aortic valve	0.525829	-2.91218	2.78549	-0.645589		-3.6989	-0.863931	-1.92098
14	Sheep_Adult_5	Aortic valve	0.848236	-1.55352	3.06284	0.0719107	0.0823079	-3.68495	-1.20695	-1.52579
14	Sheep_Adult_6	Aortic valve	0.422502	-2.89421	2.63018	-0.915272	-0.793971	-4.1696	-1.12668	-3.12988	0.222063	0.779287	0.219182	0.510239	0.619623	0.275873	0.179416	0.835732
15	Sheep_Adult_3	Left atrioventricular valve	-0.308052	-2.76179	1.3659	-0.60264		-4.25899	-0.706612	-1.69088
15	Sheep_Adult_4	Left atrioventricular valve	-0.00204154	-4.14706	1.06887	-1.20119	-0.965516	-5.21797	-1.12494	-2.52856
15	Sheep_Adult_6	Left atrioventricular valve	0.688193	-1.24569	2.38987	-0.251021	-0.420842	-3.46029	-0.736224	-1.62345	0.510322	1.45118	0.693035	0.4804	0.385143	0.880058	0.233444	0.504229
16	Sheep_Adult_3	Right atrioventricular valve	0.370467	-3.45224	1.99243	-0.717774		-4.02409	-1.05742	-2.76949
16	Sheep_Adult_5	Right atrioventricular valve	0.197687	-3.25419	1.7746	-1.65648	-0.699938	-4.35282	-1.40695	-3.58343
16	Sheep_Adult_6	Right atrioventricular valve	0.386217	-3.44342	2.30623	-1.1803	-1.12138	-4.51087	-1.53033	-3.25627	0.104598	0.111888	0.267259	0.46937	0.298003	0.248329	0.245306	0.409571
17	Sheep_Adult_5	Pulmonary valve	0.311003	-3.29336	2.14784	-0.624746	0.0614696	-4.25684	-1.11688	-2.67993
17	Sheep_Adult_5	Pulmonary valve	-0.102653	-3.28766	1.44306	-1.52707	-0.833924	-4.73981	-1.5444	-3.64464
17	Sheep_Adult_6	Pulmonary valve	0.419294	-3.36876	1.97887	-1.00859	-1.10216	-4.31144	-1.43834	-2.9702	0.275459	0.0452627	0.367957	0.452833	0.609334	0.264495	0.22262	0.494939

## Sheet: developmental qPCR data with SD
Results from RT-qPCR for cardiovascular regions during development
						Gene expression (Ave Log_Delta)													SD
Sheep_ID	Age	Age_no	Tissue	Tissue_no	Tissue_abbrev	FBN1	FBN2	RUNX2	ENPP1	MGP	OPG	ANKH	OPN	COL1A1	MMP2	TIMP1	BGN	KCNK3	FBN1	FBN2	RUNX2	ENPP1	MGP	OPG	ANKH	OPN	COL1A1	MMP2	TIMP1	BGN	KCNK3
F1	f100d	1	Left_ventricle	1	LV	-0.687961	-1.62718	-6.60397	-2.93722	-1.39151	-8.45121	-2.79166	-2.14704	-1.5131	1.16591	-2.62214	-0.102546	-4.89219
F3	f100d	1	Left_ventricle	1	LV	-0.286546	-1.5862	-6.20949	-2.42491	-0.754421	-6.8957	-2.3244	-1.83226	-1.44987	0.844451	-2.89508	-0.184872	-4.83936
F4	f100d	1	Left_ventricle	1	LV	0.0905005	-1.25421	-5.40962	-2.37017	-1.10864	-6.25526	-2.59544	-1.3859	-1.12735	1.01101	-3.32463	-0.292109	-5.48032
F5	f100d	1	Left_ventricle	1	LV	-0.168989	-0.9973	-4.92051	-1.81521	-0.210578	-7.84559	-2.03355	-3.05248	-1.43405	0.953846	-3.38179	-0.636927	-5.10426	0.32401	0.297286	0.761391	0.458769	0.50894	0.976822	0.329816	0.704976	0.172573	0.133941	0.361678	0.235058	0.290986
L1	0d	2	Left_ventricle	1	LV	-1.38333	-1.6086	-5.76056	-1.96904	-0.0663511	-9.05994	-2.20124	-4.68618	-1.26421	0.732054	-3.31246	-1.47562	-4.97255
L3	0d	2	Left_ventricle	1	LV	-1.86874	-1.71278	-5.86473	-2.05936	-0.212119	-9.70477	-2.21531	-4.11454	-1.67199	0.365862	-3.88313	-2.31315	-5.18278
L4	0d	2	Left_ventricle	1	LV	-1.92387	-2.61356	-5.41734	-2.50265	-0.558374	-9.21232	-2.29471	-5.63914	-1.11985	0.713524	-3.75728	-2.10759	-5.45202	0.297447	0.552596	0.234101	0.285601	0.252727	0.337031	0.0503928	0.770209	0.286352	0.20628	0.299824	0.436482	0.240341
L8	8w	4	Left_ventricle	1	LV	-1.08156	-3.28576	-4.49531	-2.4124	-0.381478	-8.93491	-1.62568	-5.88507	-2.19527	-0.413879	-4.10835	-1.95613	-5.84815
L9	8w	4	Left_ventricle	1	LV	-1.04005	-3.19574	-4.21466	-2.67588	-0.391958	-8.85528	-1.3381	-5.18854	-1.40528	-0.143749	-3.62335	-1.99792	-5.19679
L10	8w	4	Left_ventricle	1	LV	-0.733682	-3.95682	-4.83711	-2.7958	-1.2882	-9.15542	-1.84272	-6.28926	-1.79546	0.426072	-3.57685	-1.62564	-5.61124	0.19	0.415864	0.311725	0.196127	0.520498	0.155481	0.253127	0.556793	0.395005	0.428794	0.29436	0.203943	0.329688
A3	2y	5	Left_ventricle	1	LV	-0.737382	-4.83735	-5.2671	-2.86534	-1.44093	-9.45371	-2.19299	-6.61874	-1.94308	0.0843779	-3.50266	-1.3747	-5.25979
A4	2y	5	Left_ventricle	1	LV	-1.52766	-5.37463	-5.08351	-2.82038	-1.18802	-9.81077	-0.921159	-6.92381	-1.89112	0.108614	-3.59626	-2.41098	-4.35525
A5	2y	5	Left_ventricle	1	LV	-1.45715	-5.69228	-4.33024	-2.4934	-0.639233	-10.0071	-0.47981	-7.5811	-2.98191	-1.05842	-4.13946	-2.35114	-6.76649
A6	2y	5	Left_ventricle	1	LV	-1.58457	-5.60136	-4.50965	-2.44407	-0.770122	-10.3875	-1.27958	-7.17827	-2.77991	-0.378154	-3.934	-2.22193	-6.07236
A7	2y	5	Left_ventricle	1	LV	-1.34473	-5.61105	-3.87818	-2.23889	-4.26635	-7.1845	-1.58733	-6.60572	-3.75647	-0.425901	-4.04413	-2.25581	-6.66076	0.343313	0.348214	0.565643	0.265164	1.49145	1.26679	0.651217	0.410602	0.778599	0.475955	0.279883	0.424959	1.01559
F2	f100d	1	Interventricular_septum	2	IS	0.628015	-0.429035	-6.77826	-4.86171	-3.31599	-7.22881	-1.86385	-3.26401	-3.55935	-0.831818	-3.44152	1.55607	7.784
F3	f100d	1	Interventricular_septum	2	IS	0.229595	-0.52247	-5.10071	-1.58992	-0.106581	-6.27559	-1.1463	-1.531	-3.29556	-0.55416	-2.92126	1.72283	-1.11561
F4	f100d	1	Interventricular_septum	2	IS	0.446605	-0.291597	-5.71547	-3.34838	-1.62937	-5.64962	-0.440623	-1.44915	-3.43999	-0.826824	-2.97905	1.49868	-0.747112
F5	f100d	1	Interventricular_septum	2	IS	-0.0213954	-0.79772	-5.29971	-3.59803	-1.46314	-4.57537	-0.867035	-1.983	-2.97871	-0.472978	-2.7673	1.40892	-0.570019	0.280252	0.213849	0.748344	1.34718	1.31545	1.11354	0.598044	0.838351	0.250836	0.185299	0.29026	0.13216	4.30346
L1	0d	2	Interventricular_septum	2	IS	-1.18391	-0.878925	-4.73629	-3.66884	-0.844268	-9.1551	-0.397188	-5.09326	-3.10149	-1.52458	-4.12041	-0.200668	-3.57283
L2	0d	2	Interventricular_septum	2	IS	-0.210144	-0.899825	-4.41755	-3.30158	0.216141	-5.89049	-0.144295	-4.41062	-0.196393	-0.445926	-1.1668	2.59699	-1.09402
L4	0d	2	Interventricular_septum	2	IS	-0.784438	-1.01664	-5.1582	-2.67673	-0.451728	-7.02623	-0.281907	-3.93133	-3.60147	-1.61213	-4.32927	-0.18425	-1.89286	0.489491	0.0742173	0.37152	0.501598	0.536129	1.65729	0.126611	0.583925	1.83866	0.649512	1.76865	1.61051	1.26524
L5	1w	3	Interventricular_septum	2	IS	-0.396576	-1.22489	-4.2782	-0.933765	0.514912	-7.49094	0.209928	-2.50028	-2.54476	-1.16193	-3.80975	0.123861	-7.84387
L6	1w	3	Interventricular_septum	2	IS	-0.29994	-1.42284	-6.23328	-3.83499	-0.611856	-4.43803	-0.466296	-3.75874	-2.57033	-1.2984	-3.60312	0.729051	-6.80546
L7	1w	3	Interventricular_septum	2	IS	0.207095	-0.978186	-5.7609	-3.54976	-0.184533	-6.3882	-0.129081	-3.36954	-2.67678	-5.9519	-11.1505	1.16672	-6.43017	0.324254	0.222771	1.02012	1.59906	0.568835	1.54593	0.338112	0.644314	0.0700199	2.72695	4.29908	0.523667	0.732309
L8	8w	4	Interventricular_septum	2	IS	-0.3939	-2.60504	-5.57171	-3.71061	-0.84098	-7.38429	-0.0507918	-5.9772	-3.90957	-1.72962	-3.88877	0.453795	-1.61525
L9	8w	4	Interventricular_septum	2	IS	0.0793037	-2.57545	-4.36724	-3.51466	-0.814856	-7.22647	0.363494	-5.18168	-3.59188	-1.66493	-3.62654	0.0506102	-3.01657
L10	8w	4	Interventricular_septum	2	IS	-1.15505	-2.78394	-5.79567	-4.37818	1.02144	-9.44855	-0.448037	-6.69329	-3.15168	-1.17621	-3.43933	0.83392	-4.66274	0.622748	0.112806	0.768259	0.452715	1.0678	1.23988	0.405795	0.756152	0.380592	0.302572	0.225761	0.391711	1.52538
A3	2y	5	Interventricular_septum	2	IS	-0.454163	-3.33766	-4.40164	-3.18863	-0.280876	-5.73594	0.485052	-5.77753	-3.11102	-1.16674	-2.91347	0.58692	-4.97212
A4	2y	5	Interventricular_septum	2	IS	-0.497514	-4.54896	-4.69799	-3.35328	-0.650007	-7.03043	0.167907	-6.45858	-4.12524	-1.52594	-3.18603	-0.0633971	-5.02287
A7	2y	5	Interventricular_septum	2	IS	-0.551189	-4.23873	-5.29578	-3.94761	-0.783393	-8.44614	0.342971	-5.98893	-5.2016	-1.20214	-2.71666	0.236143	-3.66974	0.0486045	0.629211	0.455463	0.399247	0.260312	1.35555	0.158858	0.348589	1.04544	0.197956	0.235697	0.325495	0.766997
L1	0d	2	Pulmonary_artery	3	PA	0.278449	-0.55934	-4.88014	1.0196	4.91022	-3.91868	-0.850089	-1.62164	1.53149	1.04629	-0.776691	3.2193	-2.16992
L3	0d	2	Pulmonary_artery	3	PA	0.306559	-0.37023	-4.58242	1.41039	4.31693	-3.67137	-1.52234	-1.79314	1.35749	1.9224	-0.621445	3.91867	-1.22102
L4	0d	2	Pulmonary_artery	3	PA	0.569071	-0.886536	-5.28206	1.76833	4.37576	-2.48468	-1.64107	-0.736987	1.32476	0.77371	-0.539803	4.12854	-1.49288	0.160294	0.261213	0.351113	0.374485	0.326879	0.766566	0.42655	0.566787	0.111118	0.600192	0.120334	0.476074	0.488654
L8	8w	4	Pulmonary_artery	3	PA	0.290974	-1.2754	-4.79389	1.50211	4.66637	-2.93714	-0.782235	-2.12256	1.21766	1.47066	-0.331527	3.99371	-2.22382
L9	8w	4	Pulmonary_artery	3	PA	0.166585	-1.14608	-4.05602	1.09944	3.43346	-3.26393	-0.523271	-1.03086	0.909508	1.04467	-0.241116	4.03907	-1.2947
L10	8w	4	Pulmonary_artery	3	PA	0.549182	-1.72844	-3.79993	1.30254	3.5108	-3.03136	0.393337	-1.64729	1.0781	1.05384	-0.710224	3.89574	-1.03947	0.19516	0.305811	0.516075	0.20134	0.690578	0.168203	0.617684	0.547366	0.154302	0.243339	0.24888	0.073256	0.62331
A3	2y	5	Pulmonary_artery	3	PA	0.097703	-1.52384	-4.37069	1.4283	3.94629	-1.91228	-1.1338	-4.015	0.770951	0.965032	-0.448989	2.95436	-5.03762
A4	2y	5	Pulmonary_artery	3	PA	0.739428	-2.99418	-3.01983	2.48412	3.66438	-1.42679	-1.83981	-3.65516	2.13928	3.49785	0.988657	4.10782	0.399482
A5	2y	5	Pulmonary_artery	3	PA	0.301081	-3.80542	-2.60709	2.30703	4.51975	-0.494369	-2.64861	-2.99143	0.162009	2.06816	-0.260811	3.14254	-2.89477
A6	2y	5	Pulmonary_artery	3	PA	-0.316505	-2.42966	-3.33768	2.20759	4.46669	-3.61017	-0.272212	-3.37791	1.04459	3.34584	0.347981	4.29545	-1.76612
A7	2y	5	Pulmonary_artery	3	PA	-0.198144	-3.94231	-3.22725	2.20241	4.85968	-2.54698	-1.6553	-3.74203	-1.19748	-0.909822	1.12456	2.54898	-1.79358	0.420898	1.0028	0.654011	0.406296	0.47908	1.17207	0.880337	0.389093	1.22655	1.82923	0.710512	0.75688	1.97761
L1	0d	2	Aortic_base	4	Ab	0.884701	-0.754592	-5.11449	-0.155019	1.84471	-3.92227	-3.40935	-6.52851	-0.733651	0.472425	-2.02637	0.836328	-3.26017
L2	0d	2	Aortic_base	4	Ab	1.06259	-0.618293	-3.86569	0.123375	1.73148	-3.35969	-3.30424	-4.09096	-0.129677	0.972427	-1.54716	0.913509	-3.24537
L3	0d	2	Aortic_base	4	Ab	0.210091	-1.23859	-4.96425	-1.18314	0.664102	-4.34735	-3.38388	-5.44946	-0.330156	1.24675	-2.4096	0.865523	-2.85321	0.449722	0.325984	0.681777	0.688173	0.651402	0.495424	0.0548309	1.22144	0.307621	0.392607	0.432106	0.0389701	0.230805
L5	1w	3	Aortic_base	4	Ab	0.397306	-1.28704	-4.1636	-0.351293	0.962221	-4.7805	-1.95939	-2.41341	0.00445085	0.857022	-2.37304	1.33876	-2.35572
L6	1w	3	Aortic_base	4	Ab	0.625192	-1.11461	-4.55955	-0.296694	1.51242	-2.67419	-2.58755	-2.92026	0.105692	1.28751	-1.99801	1.8247	-3.43629
L7	1w	3	Aortic_base	4	Ab	0.482299	-1.69072	-4.40092	-0.73764	1.49776	-3.73204	-2.82055	-3.47557	0.14343	1.12077	-2.08157	1.05145	-3.22527	0.115162	0.295688	0.199272	0.240374	0.313511	1.05316	0.44543	0.531267	0.0718668	0.217057	0.196888	0.390851	0.572755
L8	8w	4	Aortic_base	4	Ab	0.140754	-2.43082	-4.43055	-1.11731	1.18394	-2.63183	-3.07891	-5.65396	-0.720767	0.967047	-12.2305	1.10221	-3.07747
L9	8w	4	Aortic_base	4	Ab	0.484547	-2.31577	-4.13874	-0.624488	0.942024	-3.03317	-2.23606	-4.26698	-0.731723	0.529804	-2.00711	1.12245	-2.60669
L10	8w	4	Aortic_base	4	Ab	0.477818	-2.02098	-3.66374	-0.828765	0.384243	-3.10575	-1.97592	-5.21985	-0.637034	0.607165	-1.63517	1.36963	-4.56025	0.196575	0.211389	0.387038	0.247608	0.410114	0.255258	0.57658	0.709475	0.0517965	0.233338	6.01271	0.148896	1.01953
A4	2y	5	Aortic_base	4	Ab	0.015511	-2.68776	-4.44489	-0.954895	2.0291	-2.45902	-2.84372	-5.20042	-0.606429	0.693222	-1.5699	0.772934	-5.65254
A5	2y	5	Aortic_base	4	Ab	-0.0906032	-4.41584	-5.02928	-1.49769	1.21251	-2.44037	-2.89785	-6.62698	-2.44061	-0.510193	-1.09937	0.0512563	-7.89221
A6	2y	5	Aortic_base	4	Ab	-0.497915	-4.46965	-5.03803	-1.71092	-1.66933	-4.37261	-6.81595	-11.0649	-0.675052	0.0284921	-1.42019	0.156724	-3.2397
A7	2y	5	Aortic_base	4	Ab	-0.667032	-5.2418	-4.84324	-1.95629	1.96693	-1.86271	-4.10158	-8.2258	-3.17559	-1.78236	-0.53123	-0.517367	-5.02282	0.325001	1.0788	0.277583	0.426709	1.74274	1.09486	1.86038	2.51484	1.2871	1.04906	0.459946	0.528699	1.92123
L1	0d	2	Aortic_arch	5	Aa	0.654809	-1.29045	-5.62523	3.01004	4.17442	-4.84384	-2.45752	-0.480702	0.973094	1.03548	-0.208722	3.13571	-3.06795
L3	0d	2	Aortic_arch	5	Aa	0.109035	-0.802335	-3.89753	1.88571	3.89884	-3.08934	-3.94094	-2.58697	1.07829	0.99165	0.821829	3.00871	-3.12564
L4	0d	2	Aortic_arch	5	Aa	0.0711745	-0.618707	-4.83733	1.82065	4.15872	-3.94326	-2.9928	-1.6468	1.75317	0.765432	-0.2327	2.62653	-3.81627	0.326581	0.34718	0.86496	0.668704	0.15477	0.87735	0.751229	1.05515	0.423288	0.144925	0.60203	0.265033	0.416388
L5	1w	3	Aortic_arch	5	Aa	-0.369032	-1.46613	-3.59044	2.4017	3.33146	-3.80452	-2.16351	0.536828	1.59028	1.06003	-0.0178182	3.01817	-2.49929
L6	1w	3	Aortic_arch	5	Aa	-0.139061	-1.6289	-3.07082	1.78113	3.45456	-3.12735	-2.71978	-0.707128	1.12831	0.864912	-0.13322	2.9097	-1.84529
L7	1w	3	Aortic_arch	5	Aa	0.0933446	-2.17501	-3.33063	2.57258	3.42921	-3.94716	-1.79463	-0.624324	1.95369	1.33332	0.383709	3.38504	-3.67467	0.231189	0.371311	0.259811	0.416469	0.0650033	0.437985	0.465724	0.695528	0.41367	0.235289	0.271342	0.249101	0.926988
A3	2y	5	Aortic_arch	5	Aa	0.436679	-3.64599	-2.22896	2.40674	3.14881	-1.09325	-2.6609	-2.43191	1.4978	2.03845	1.22747	3.39009	-3.42701
A4	2y	5	Aortic_arch	5	Aa	0.582593	-3.10639	-3.46186	2.12677	4.12414	-2.12972	-3.4257	-3.50493	2.58243	1.42141	1.18227	3.27904	-2.35971
A5	2y	5	Aortic_arch	5	Aa	-0.18593	-4.62664	-3.36505	1.96841	4.51426	-2.22389	-3.05043	-3.21941	1.08113	0.131514	0.859319	2.50554	-2.23558
A6	2y	5	Aortic_arch	5	Aa	-0.563008	-4.21607	-1.68597	3.14502	4.42302	-2.71995	-2.71543	-4.32865	0.678606	0.671675	0.779113	2.49119	-3.19609
A7	2y	5	Aortic_arch	5	Aa	-0.32701	-5.87617	-1.63278	3.19537	4.84871	-1.91495	-3.36109	-5.66792	-0.738607	-1.0228	1.13289	2.19687	-3.43148	0.496977	1.05479	0.88861	0.571564	0.647957	0.594428	0.353907	1.23083	1.21269	1.1822	0.202887	0.529093	0.586676
L1	0d	2	Abdominal_aorta	6	AA	-0.0646923	-1.73518	-4.57015	-2.31742	0.728961	-3.86314	-2.31395	-3.2497	-2.25623	0.630728	-2.05175	0.207908	-2.79689
L2	0d	2	Abdominal_aorta	6	AA	-0.5725	-2.48905	-4.36748	-2.56876	0.34592	-4.00704	-3.67433	-4.39867	-3.88214	-0.537709	-3.15781	-2.85282	-5.55263
L3	0d	2	Abdominal_aorta	6	AA	0.0349574	-1.35827	-6.32813	-1.66672	0.419654	-4.11006	-2.06181	-5.73203	-2.4885	-0.821479	-2.15579	0.751966	-3.05688	0.325782	0.575769	1.07825	0.465523	0.203235	0.124025	0.867413	1.2423	0.879374	0.769705	0.610767	1.9433	1.52154
L8	8w	4	Abdominal_aorta	6	AA	0.859078	-1.7125	-4.25635	-2.00709	1.26457	-3.01908	-1.75062	-3.61519	-0.694886	1.4504	-1.71381	0.594368	-3.28379
L9	8w	4	Abdominal_aorta	6	AA	1.02317	-1.1845	-3.62091	-1.87072	0.853352	-2.94163	-0.723558	-2.01281	-1.66638	0.361071	-1.604	0.912123	-2.59867
L10	8w	4	Abdominal_aorta	6	AA	0.810928	-1.50765	-3.60789	-2.13841	1.00501	-2.77264	-0.908077	-3.77078	-0.840232	0.199489	-1.86956	0.719349	-3.10682	0.111275	0.266198	0.370686	0.133856	0.207955	0.12602	0.547538	0.97316	0.524001	0.680386	0.133438	0.160078	0.355653
A3	2y	5	Abdominal_aorta	6	AA	0.779597	-2.93221	-4.99779	-2.46433	0.363708	-2.13509	-1.5979	-4.63735	-1.1228	1.1022	-0.91486	1.31707	-1.57682
A4	2y	5	Abdominal_aorta	6	AA	0.455503	-3.46771	-4.97877	-2.22351	0.691173	-2.38293	-1.80069	-5.39812	-0.874955	0.473217	-0.857626	1.13864	-2.78111
A5	2y	5	Abdominal_aorta	6	AA	-0.193046	-4.06081	-4.87872	-3.21517	0.295623	-2.65718	-1.05601	-4.8406	-2.99852	0.117179	-1.00225	0.779135	-2.25685
A6	2y	5	Abdominal_aorta	6	AA	0.239913	-4.58439	-4.52201	-2.9451	1.31429	-2.87925	-1.35433	-4.73342	-1.47278	0.818073	-1.30296	0.523485	-2.4016	0.407929	0.716653	0.221131	0.44999	0.465286	0.323863	0.321049	0.340769	0.952934	0.426571	0.198157	0.356372	0.502731
